# Supplementary material for: Forkhead transcription factor FKH-8 cooperates with RFX in the direct regulation of sensory cilia in Caenorhabditis elegans
Source: eLife. 2023 Jul 14;12:e89702. doi: 10.7554/eLife.89702 (PMC10393296; doi:10.7554/eLife.89702)
Supplement: Figure 1—source data 1. [file elife-89702-fig1-data1.xlsx]

## Sheet: F1C and F1S2
Gene	Reporter	Rep. Lenght	Background	Temp. (º)	N	Worm	Stage	Labial Region	Amphid Region	Anterior Deirid Region	Posterior Deirid Region	Phasmid Region	Neurons
che-11	vlcEx827	207	wild type	25	8	1	Young Adult	14	22	1	1	5	43
che-11	vlcEx827	207	wild type	25	8	2	Young Adult	17	21	1	2	4	45
che-11	vlcEx827	207	wild type	25	8	3	Young Adult	10	20	0	0	4	34
che-11	vlcEx827	207	wild type	25	8	4	Young Adult	10	19	2	1	4	36
che-11	vlcEx827	207	wild type	25	8	5	Young Adult	14	19	1	1	4	39
che-11	vlcEx827	207	wild type	25	8	6	Young Adult	12	20	1	0	4	37
che-11	vlcEx827	207	wild type	25	8	7	Young Adult	12	19	1	0	4	36
che-11	vlcEx827	207	wild type	25	8	8	Young Adult	18	19	2	1	4	44
che-11	vlcEx827	207	wild type	25	8	ALL	Mean	13.375	19.875	1.125	0.75	4.125	39.25
che-11	vlcEx827	207	wild type	25	8	ALL	SD	2.97309	1.12599	0.64087	0.707107	0.353553	4.20034
che-11	vlcEx827	207	daf-19(m86); daf-12(sa204)	25	8	1	Young Adult	6	0	0	0	1	7
che-11	vlcEx827	207	daf-19(m86); daf-12(sa204)	25	8	2	Young Adult	4	0	0	0	1	5
che-11	vlcEx827	207	daf-19(m86); daf-12(sa204)	25	8	3	Young Adult	6	0	0	0	1	7
che-11	vlcEx827	207	daf-19(m86); daf-12(sa204)	25	8	4	Young Adult	5	0	0	0	1	6
che-11	vlcEx827	207	daf-19(m86); daf-12(sa204)	25	8	5	Young Adult	5	1	0	0	1	7
che-11	vlcEx827	207	daf-19(m86); daf-12(sa204)	25	8	6	Young Adult	6	2	0	0	0	8
che-11	vlcEx827	207	daf-19(m86); daf-12(sa204)	25	8	7	Young Adult	7	2	0	0	1	10
che-11	vlcEx827	207	daf-19(m86); daf-12(sa204)	25	8	8	Young Adult	3	2	3	0	1	9
che-11	vlcEx827	207	daf-19(m86); daf-12(sa204)	25	8	ALL	Mean	5.25	0.875	0.375	0	0.875	7.375
che-11	vlcEx827	207	daf-19(m86); daf-12(sa204)	25	8	ALL	SD	1.28174	0.991031	1.06066	0	0.353553	1.59799
che-11	vlcEx827	207	daf-12(sa204)	25	8	1	Young Adult	15	14	1	1	5	36
che-11	vlcEx827	207	daf-12(sa204)	25	8	2	Young Adult	14	18	0	0	5	37
che-11	vlcEx827	207	daf-12(sa204)	25	8	3	Young Adult	16	17	0	0	5	38
che-11	vlcEx827	207	daf-12(sa204)	25	8	4	Young Adult	17	18	2	0	5	42
che-11	vlcEx827	207	daf-12(sa204)	25	8	5	Young Adult	13	18	1	0	5	37
che-11	vlcEx827	207	daf-12(sa204)	25	8	6	Young Adult	15	19	3	2	5	44
che-11	vlcEx827	207	daf-12(sa204)	25	8	7	Young Adult	15	21	1	0	4	41
che-11	vlcEx827	207	daf-12(sa204)	25	8	8	Young Adult	17	17	2	1	4	41
che-11	vlcEx827	207	daf-12(sa204)	25	8	ALL	Mean	15.25	17.75	1.25	0.5	4.75	39.5
che-11	vlcEx827	207	daf-12(sa204)	25	8	ALL	SD	1.38873	1.98206	1.0351	0.755929	0.46291	2.87849
che-13	vlcEx812	525	wild type	25	5	1	Young Adult	19	21	3	2	5	50
che-13	vlcEx812	525	wild type	25	5	2	Young Adult	18	26	3	2	5	54
che-13	vlcEx812	525	wild type	25	5	3	Young Adult	21	22	2	1	5	51
che-13	vlcEx812	525	wild type	25	5	4	Young Adult	18	22	3	2	5	50
che-13	vlcEx812	525	wild type	25	5	5	Young Adult	17	27	3	1	5	53
che-13	vlcEx812	525	wild type	25	5	ALL	Mean	18.6	23.6	2.8	1.6	5	51.6
che-13	vlcEx812	525	wild type	25	5	ALL	SD	1.51658	2.70185	0.447214	0.547723	0	1.81659
che-13	vlcEx812	525	daf-19(m86); daf-12(sa204)	25	14	1	Young Adult	2	3	0	0	0	5
che-13	vlcEx812	525	daf-19(m86); daf-12(sa204)	25	14	2	Young Adult	2	2	0	0	0	4
che-13	vlcEx812	525	daf-19(m86); daf-12(sa204)	25	14	3	Young Adult	2	2	0	0	0	4
che-13	vlcEx812	525	daf-19(m86); daf-12(sa204)	25	14	4	Young Adult	1	2	0	0	0	3
che-13	vlcEx812	525	daf-19(m86); daf-12(sa204)	25	14	5	Young Adult	2	2	0	0	0	4
che-13	vlcEx812	525	daf-19(m86); daf-12(sa204)	25	14	6	Young Adult	3	2	0	0	0	5
che-13	vlcEx812	525	daf-19(m86); daf-12(sa204)	25	14	7	Young Adult	2	2	0	0	0	4
che-13	vlcEx812	525	daf-19(m86); daf-12(sa204)	25	14	8	Young Adult	1	1	0	0	0	2
che-13	vlcEx812	525	daf-19(m86); daf-12(sa204)	25	14	9	Young Adult	2	1	0	0	0	3
che-13	vlcEx812	525	daf-19(m86); daf-12(sa204)	25	14	10	Young Adult	2	2	0	0	0	4
che-13	vlcEx812	525	daf-19(m86); daf-12(sa204)	25	14	11	Young Adult	2	2	0	0	0	4
che-13	vlcEx812	525	daf-19(m86); daf-12(sa204)	25	14	12	Young Adult	1	2	0	0	0	3
che-13	vlcEx812	525	daf-19(m86); daf-12(sa204)	25	14	13	Young Adult	1	1	0	0	0	2
che-13	vlcEx812	525	daf-19(m86); daf-12(sa204)	25	14	14	Young Adult	2	2	0	0	0	4
che-13	vlcEx812	525	daf-19(m86); daf-12(sa204)	25	14	ALL	Mean	1.78571	1.85714	0	0	0	3.64286
che-13	vlcEx812	525	daf-19(m86); daf-12(sa204)	25	14	ALL	SD	0.578934	0.534522	0	0	0	0.928783
che-13	vlcEx812	525	daf-12(sa204)	25	7	1	Young Adult	18	24	3	1	4	50
che-13	vlcEx812	525	daf-12(sa204)	25	7	2	Young Adult	17	19	2	0	4	42
che-13	vlcEx812	525	daf-12(sa204)	25	7	3	Young Adult	19	19	0	1	5	44
che-13	vlcEx812	525	daf-12(sa204)	25	7	4	Young Adult	16	19	3	2	5	45
che-13	vlcEx812	525	daf-12(sa204)	25	7	5	Young Adult	14	21	2	0	5	42
che-13	vlcEx812	525	daf-12(sa204)	25	7	6	Young Adult	18	22	1	0	5	46
che-13	vlcEx812	525	daf-12(sa204)	25	7	7	Young Adult	22	21	3	1	5	52
che-13	vlcEx812	525	daf-12(sa204)	25	7	ALL	Mean	17.7143	20.7143	2	0.714286	4.71429	45.8571
che-13	vlcEx812	525	daf-12(sa204)	25	7	ALL	SD	2.49762	1.88982	1.1547	0.755929	0.48795	3.84831
ift-20	otIs395	171	wild type	25	10	1	Young Adult	22	23	4	2	5	56
ift-20	otIs395	171	wild type	25	10	2	Young Adult	20	23	2	2	5	52
ift-20	otIs395	171	wild type	25	10	3	Young Adult	22	23	1	2	5	53
ift-20	otIs395	171	wild type	25	10	4	Young Adult	23	24	3	2	5	57
ift-20	otIs395	171	wild type	25	10	5	Young Adult	23	23	3	2	4	55
ift-20	otIs395	171	wild type	25	10	6	Young Adult	24	24	3	2	5	58
ift-20	otIs395	171	wild type	25	10	7	Young Adult	24	24	3	2	5	58
ift-20	otIs395	171	wild type	25	10	8	Young Adult	24	24	1	2	5	56
ift-20	otIs395	171	wild type	25	10	9	Young Adult	22	23	2	2	5	54
ift-20	otIs395	171	wild type	25	10	10	Young Adult	24	24	5	2	5	60
ift-20	otIs395	171	wild type	25	10	ALL	Mean	22.8	23.5	2.7	2	4.9	55.9
ift-20	otIs395	171	wild type	25	10	ALL	SD	1.31656	0.527046	1.25167	0	0.316228	2.46982
ift-20	otIs395	171	daf-19(m86); daf-12(sa204)	25	9	1	Young Adult	8	0	0	0	1	9
ift-20	otIs395	171	daf-19(m86); daf-12(sa204)	25	9	2	Young Adult	6	0	1	0	3	10
ift-20	otIs395	171	daf-19(m86); daf-12(sa204)	25	9	3	Young Adult	10	0	0	0	2	12
ift-20	otIs395	171	daf-19(m86); daf-12(sa204)	25	9	4	Young Adult	7	0	0	0	0	7
ift-20	otIs395	171	daf-19(m86); daf-12(sa204)	25	9	5	Young Adult	9	0	0	0	2	11
ift-20	otIs395	171	daf-19(m86); daf-12(sa204)	25	9	6	Young Adult	9	2	0	0	1	12
ift-20	otIs395	171	daf-19(m86); daf-12(sa204)	25	9	7	Young Adult	13	0	0	0	1	14
ift-20	otIs395	171	daf-19(m86); daf-12(sa204)	25	9	8	Young Adult	9	0	0	0	2	11
ift-20	otIs395	171	daf-19(m86); daf-12(sa204)	25	9	9	Young Adult	5	0	0	0	0	5
ift-20	otIs395	171	daf-19(m86); daf-12(sa204)	25	9	ALL	Mean	8.44444	0.222222	0.111111	0	1.33333	10.1111
ift-20	otIs395	171	daf-19(m86); daf-12(sa204)	25	9	ALL	SD	2.35112	0.666667	0.333333	0	1	2.75882
ift-20	otIs395	171	daf-12(sa204)	25	12	1	Young Adult	16	18	3	2	5	44
ift-20	otIs395	171	daf-12(sa204)	25	12	2	Young Adult	12	19	3	2	4	40
ift-20	otIs395	171	daf-12(sa204)	25	12	3	Young Adult	14	17	1	1	5	38
ift-20	otIs395	171	daf-12(sa204)	25	12	4	Young Adult	15	16	3	2	4	40
ift-20	otIs395	171	daf-12(sa204)	25	12	5	Young Adult	17	18	3	2	4	44
ift-20	otIs395	171	daf-12(sa204)	25	12	6	Young Adult	13	14	3	1	4	35
ift-20	otIs395	171	daf-12(sa204)	25	12	7	Young Adult	10	20	2	2	4	38
ift-20	otIs395	171	daf-12(sa204)	25	12	8	Young Adult	14	18	3	2	5	42
ift-20	otIs395	171	daf-12(sa204)	25	12	9	Young Adult	12	20	2	2	4	40
ift-20	otIs395	171	daf-12(sa204)	25	12	10	Young Adult	19	24	2	2	4	51
ift-20	otIs395	171	daf-12(sa204)	25	12	11	Young Adult	17	22	3	2	4	48
ift-20	otIs395	171	daf-12(sa204)	25	12	12	Young Adult	15	21	2	2	5	45
ift-20	otIs395	171	daf-12(sa204)	25	12	ALL	Mean	14.5	18.9167	2.5	1.83333	4.33333	42.0833
ift-20	otIs395	171	daf-12(sa204)	25	12	ALL	SD	2.54058	2.71221	0.6742	0.389249	0.492366	4.54189
mks-1	vlcEx1131	144	wild type	25	13	1	Young Adult	5	8	0	0	4	17
mks-1	vlcEx1131	144	wild type	25	13	2	Young Adult	5	6	0	0	4	15
mks-1	vlcEx1131	144	wild type	25	13	3	Young Adult	5	8	0	0	4	17
mks-1	vlcEx1131	144	wild type	25	13	4	Young Adult	5	6	0	0	3	14
mks-1	vlcEx1131	144	wild type	25	13	5	Young Adult	5	7	0	0	4	16
mks-1	vlcEx1131	144	wild type	25	13	6	Young Adult	6	4	0	0	4	14
mks-1	vlcEx1131	144	wild type	25	13	7	Young Adult	6	8	0	0	3	17
mks-1	vlcEx1131	144	wild type	25	13	8	Young Adult	6	6	0	0	3	15
mks-1	vlcEx1131	144	wild type	25	13	9	Young Adult	6	4	0	0	4	14
mks-1	vlcEx1131	144	wild type	25	13	10	Young Adult	4	6	0	0	4	14
mks-1	vlcEx1131	144	wild type	25	13	11	Young Adult	5	5	0	0	5	15
mks-1	vlcEx1131	144	wild type	25	13	12	Young Adult	5	6	0	0	3	14
mks-1	vlcEx1131	144	wild type	25	13	13	Young Adult	6	5	0	0	4	15
mks-1	vlcEx1131	144	wild type	25	13	ALL	Mean	5.30769	6.07692	0	0	3.76923	15.1538
mks-1	vlcEx1131	144	wild type	25	13	ALL	SD	0.630425	1.38212	0	0	0.599145	1.21423
mks-1	vlcEx1131	144	daf-19(m86); daf-12(sa204)	25	12	1	Young Adult	0	0	0	0	0	0
mks-1	vlcEx1131	144	daf-19(m86); daf-12(sa204)	25	12	2	Young Adult	0	0	0	0	0	0
mks-1	vlcEx1131	144	daf-19(m86); daf-12(sa204)	25	12	3	Young Adult	0	0	0	0	0	0
mks-1	vlcEx1131	144	daf-19(m86); daf-12(sa204)	25	12	4	Young Adult	0	0	0	0	0	0
mks-1	vlcEx1131	144	daf-19(m86); daf-12(sa204)	25	12	5	Young Adult	0	0	0	0	0	0
mks-1	vlcEx1131	144	daf-19(m86); daf-12(sa204)	25	12	6	Young Adult	0	0	0	0	0	0
mks-1	vlcEx1131	144	daf-19(m86); daf-12(sa204)	25	12	7	Young Adult	0	0	0	0	0	0
mks-1	vlcEx1131	144	daf-19(m86); daf-12(sa204)	25	12	8	Young Adult	0	0	0	0	0	0
mks-1	vlcEx1131	144	daf-19(m86); daf-12(sa204)	25	12	9	Young Adult	0	0	0	0	0	0
mks-1	vlcEx1131	144	daf-19(m86); daf-12(sa204)	25	12	10	Young Adult	0	0	0	0	0	0
mks-1	vlcEx1131	144	daf-19(m86); daf-12(sa204)	25	12	11	Young Adult	0	0	0	0	0	0
mks-1	vlcEx1131	144	daf-19(m86); daf-12(sa204)	25	12	12	Young Adult	0	0	0	0	0	0
mks-1	vlcEx1131	144	daf-19(m86); daf-12(sa204)	25	12	ALL	Mean	0	0	0	0	0	0
mks-1	vlcEx1131	144	daf-19(m86); daf-12(sa204)	25	12	ALL	SD	0	0	0	0	0	0
mks-1	vlcEx1131	144	daf-12(sa204)	25	10	1	Young Adult	5	3	0	0	1	9
mks-1	vlcEx1131	144	daf-12(sa204)	25	10	2	Young Adult	5	4	0	0	3	12
mks-1	vlcEx1131	144	daf-12(sa204)	25	10	3	Young Adult	5	4	0	0	4	13
mks-1	vlcEx1131	144	daf-12(sa204)	25	10	4	Young Adult	4	3	0	0	0	7
mks-1	vlcEx1131	144	daf-12(sa204)	25	10	5	Young Adult	3	4	0	0	3	10
mks-1	vlcEx1131	144	daf-12(sa204)	25	10	6	Young Adult	4	6	0	0	2	12
mks-1	vlcEx1131	144	daf-12(sa204)	25	10	7	Young Adult	6	5	0	0	4	15
mks-1	vlcEx1131	144	daf-12(sa204)	25	10	8	Young Adult	6	5	0	0	3	14
mks-1	vlcEx1131	144	daf-12(sa204)	25	10	9	Young Adult	6	6	0	0	2	14
mks-1	vlcEx1131	144	daf-12(sa204)	25	10	10	Young Adult	5	3	0	0	3	11
mks-1	vlcEx1131	144	daf-12(sa204)	25	10	ALL	Mean	4.9	4.3	0	0	2.5	11.7
mks-1	vlcEx1131	144	daf-12(sa204)	25	10	ALL	SD	0.994429	1.1595	0	0	1.2693	2.49666
osm-1	vlcEx815	1770	wild type	25	9	1	Young Adult	20	25	0	0	5	50
osm-1	vlcEx815	1770	wild type	25	9	2	Young Adult	19	17	3	0	5	44
osm-1	vlcEx815	1770	wild type	25	9	3	Young Adult	16	24	0	0	3	43
osm-1	vlcEx815	1770	wild type	25	9	4	Young Adult	20	22	2	1	4	49
osm-1	vlcEx815	1770	wild type	25	9	5	Young Adult	21	22	1	0	5	49
osm-1	vlcEx815	1770	wild type	25	9	6	Young Adult	21	26	0	0	5	52
osm-1	vlcEx815	1770	wild type	25	9	7	Young Adult	20	24	0	0	4	48
osm-1	vlcEx815	1770	wild type	25	9	8	Young Adult	21	22	3	0	5	51
osm-1	vlcEx815	1770	wild type	25	9	9	Young Adult	20	21	2	0	5	48
osm-1	vlcEx815	1770	wild type	25	9	ALL	Mean	19.7778	22.5556	1.22222	0.111111	4.55556	48.2222
osm-1	vlcEx815	1770	wild type	25	9	ALL	SD	1.56347	2.651	1.30171	0.333333	0.726483	2.99073
osm-1	vlcEx815	1770	daf-19(m86); daf-12(sa204)	25	12	1	Young Adult	4	2	0	0	2	8
osm-1	vlcEx815	1770	daf-19(m86); daf-12(sa204)	25	12	2	Young Adult	5	2	0	0	2	9
osm-1	vlcEx815	1770	daf-19(m86); daf-12(sa204)	25	12	3	Young Adult	4	1	0	0	2	7
osm-1	vlcEx815	1770	daf-19(m86); daf-12(sa204)	25	12	4	Young Adult	2	7	0	0	2	11
osm-1	vlcEx815	1770	daf-19(m86); daf-12(sa204)	25	12	5	Young Adult	4	2	0	0	2	8
osm-1	vlcEx815	1770	daf-19(m86); daf-12(sa204)	25	12	6	Young Adult	3	7	0	0	1	11
osm-1	vlcEx815	1770	daf-19(m86); daf-12(sa204)	25	12	7	Young Adult	3	2	0	0	2	7
osm-1	vlcEx815	1770	daf-19(m86); daf-12(sa204)	25	12	8	Young Adult	2	4	0	0	2	8
osm-1	vlcEx815	1770	daf-19(m86); daf-12(sa204)	25	12	9	Young Adult	3	2	0	0	2	7
osm-1	vlcEx815	1770	daf-19(m86); daf-12(sa204)	25	12	10	Young Adult	5	3	0	0	2	10
osm-1	vlcEx815	1770	daf-19(m86); daf-12(sa204)	25	12	11	Young Adult	2	4	0	0	1	7
osm-1	vlcEx815	1770	daf-19(m86); daf-12(sa204)	25	12	12	Young Adult	4	5	0	0	2	11
osm-1	vlcEx815	1770	daf-19(m86); daf-12(sa204)	25	12	ALL	Mean	3.41667	3.41667	0	0	1.83333	8.66667
osm-1	vlcEx815	1770	daf-19(m86); daf-12(sa204)	25	12	ALL	SD	1.08362	2.02073	0	0	0.389249	1.66969
osm-1	vlcEx815	1770	daf-12(sa204)	25	7	1	Young Adult	16	21	0	0	5	42
osm-1	vlcEx815	1770	daf-12(sa204)	25	7	2	Young Adult	14	16	1	1	4	36
osm-1	vlcEx815	1770	daf-12(sa204)	25	7	3	Young Adult	15	18	1	1	5	40
osm-1	vlcEx815	1770	daf-12(sa204)	25	7	4	Young Adult	14	18	1	2	5	40
osm-1	vlcEx815	1770	daf-12(sa204)	25	7	5	Young Adult	14	19	1	0	3	37
osm-1	vlcEx815	1770	daf-12(sa204)	25	7	6	Young Adult	14	20	1	0	4	39
osm-1	vlcEx815	1770	daf-12(sa204)	25	7	7	Young Adult	16	21	0	0	4	41
osm-1	vlcEx815	1770	daf-12(sa204)	25	7	ALL	Mean	14.7143	19	0.714286	0.571429	4.28571	39.2857
osm-1	vlcEx815	1770	daf-12(sa204)	25	7	ALL	SD	0.95119	1.82574	0.48795	0.786796	0.755929	2.13809
osm-5	vlcEx1133	142	wild type	25	8	1	Young Adult	4	4	3	2	4	17
osm-5	vlcEx1133	142	wild type	25	8	2	Young Adult	6	6	1	1	4	18
osm-5	vlcEx1133	142	wild type	25	8	3	Young Adult	3	7	1	1	3	15
osm-5	vlcEx1133	142	wild type	25	8	4	Young Adult	3	7	1	0	3	14
osm-5	vlcEx1133	142	wild type	25	8	5	Young Adult	2	8	2	1	3	16
osm-5	vlcEx1133	142	wild type	25	8	6	Young Adult	7	5	1	1	4	18
osm-5	vlcEx1133	142	wild type	25	8	7	Young Adult	6	6	0	1	4	17
osm-5	vlcEx1133	142	wild type	25	8	8	Young Adult	2	7	1	0	5	15
osm-5	vlcEx1133	142	wild type	25	8	ALL	Mean	4.125	6.25	1.25	0.875	3.75	16.25
osm-5	vlcEx1133	142	wild type	25	8	ALL	SD	1.95941	1.28174	0.886405	0.64087	0.707107	1.48805
osm-5	vlcEx1133	142	daf-19(m86); daf-12(sa204)	25	12	1	Young Adult	0	0	0	0	0	0
osm-5	vlcEx1133	142	daf-19(m86); daf-12(sa204)	25	12	2	Young Adult	0	0	0	0	0	0
osm-5	vlcEx1133	142	daf-19(m86); daf-12(sa204)	25	12	3	Young Adult	0	0	0	0	0	0
osm-5	vlcEx1133	142	daf-19(m86); daf-12(sa204)	25	12	4	Young Adult	0	0	0	0	0	0
osm-5	vlcEx1133	142	daf-19(m86); daf-12(sa204)	25	12	5	Young Adult	0	0	0	0	0	0
osm-5	vlcEx1133	142	daf-19(m86); daf-12(sa204)	25	12	6	Young Adult	0	0	0	0	0	0
osm-5	vlcEx1133	142	daf-19(m86); daf-12(sa204)	25	12	7	Young Adult	2	0	0	0	0	2
osm-5	vlcEx1133	142	daf-19(m86); daf-12(sa204)	25	12	8	Young Adult	2	0	0	0	0	2
osm-5	vlcEx1133	142	daf-19(m86); daf-12(sa204)	25	12	9	Young Adult	1	0	0	0	0	1
osm-5	vlcEx1133	142	daf-19(m86); daf-12(sa204)	25	12	10	Young Adult	0	0	0	0	0	0
osm-5	vlcEx1133	142	daf-19(m86); daf-12(sa204)	25	12	11	Young Adult	0	0	0	0	0	0
osm-5	vlcEx1133	142	daf-19(m86); daf-12(sa204)	25	12	12	Young Adult	0	0	0	0	1	1
osm-5	vlcEx1133	142	daf-19(m86); daf-12(sa204)	25	12	ALL	Mean	0.416667	0	0	0	0.0833333	0.5
osm-5	vlcEx1133	142	daf-19(m86); daf-12(sa204)	25	12	ALL	SD	0.792961	0	0	0	0.288675	0.797724
osm-5	vlcEx1133	142	daf-12(sa204)	25	10	1	Young Adult	6	8	2	2	3	21
osm-5	vlcEx1133	142	daf-12(sa204)	25	10	2	Young Adult	8	9	2	1	3	23
osm-5	vlcEx1133	142	daf-12(sa204)	25	10	3	Young Adult	5	7	0	0	4	16
osm-5	vlcEx1133	142	daf-12(sa204)	25	10	4	Young Adult	3	4	1	0	5	13
osm-5	vlcEx1133	142	daf-12(sa204)	25	10	5	Young Adult	9	8	1	0	5	23
osm-5	vlcEx1133	142	daf-12(sa204)	25	10	6	Young Adult	9	8	1	0	1	19
osm-5	vlcEx1133	142	daf-12(sa204)	25	10	7	Young Adult	10	10	3	0	3	26
osm-5	vlcEx1133	142	daf-12(sa204)	25	10	8	Young Adult	4	4	4	1	4	17
osm-5	vlcEx1133	142	daf-12(sa204)	25	10	9	Young Adult	7	7	2	0	5	21
osm-5	vlcEx1133	142	daf-12(sa204)	25	10	10	Young Adult	5	4	2	0	3	14
osm-5	vlcEx1133	142	daf-12(sa204)	25	10	ALL	Mean	6.6	6.9	1.8	0.4	3.6	19.3
osm-5	vlcEx1133	142	daf-12(sa204)	25	10	ALL	SD	2.36643	2.18327	1.13529	0.699206	1.26491	4.24395
peli-1	vlcEx835	225	wild type	25	7	1	Young Adult	3	16	0	0	5	24
peli-1	vlcEx835	225	wild type	25	7	2	Young Adult	7	15	0	0	3	25
peli-1	vlcEx835	225	wild type	25	7	3	Young Adult	6	10	0	0	5	21
peli-1	vlcEx835	225	wild type	25	7	4	Young Adult	6	15	0	0	5	26
peli-1	vlcEx835	225	wild type	25	7	5	Young Adult	8	13	0	0	4	25
peli-1	vlcEx835	225	wild type	25	7	6	Young Adult	7	15	0	0	5	27
peli-1	vlcEx835	225	wild type	25	7	7	Young Adult	10	15	0	0	4	29
peli-1	vlcEx835	225	wild type	25	7	ALL	Mean	6.71429	14.1429	0	0	4.42857	25.2857
peli-1	vlcEx835	225	wild type	25	7	ALL	SD	2.13809	2.0354	0	0	0.786796	2.49762
peli-1	vlcEx824	1108	wild type	25	6	1	Young Adult	15	18	1	2	3	39
peli-1	vlcEx824	1108	wild type	25	6	2	Young Adult	18	15	1	2	4	40
peli-1	vlcEx824	1108	wild type	25	6	3	Young Adult	20	19	2	2	6	49
peli-1	vlcEx824	1108	wild type	25	6	4	Young Adult	17	21	3	2	6	49
peli-1	vlcEx824	1108	wild type	25	6	5	Young Adult	22	19	1	2	5	49
peli-1	vlcEx824	1108	wild type	25	6	6	Young Adult	16	18	3	2	5	44
peli-1	vlcEx824	1108	wild type	25	6	ALL	Mean	18	18.3333	1.83333	2	4.83333	45
peli-1	vlcEx824	1108	wild type	25	6	ALL	SD	2.60768	1.96638	0.983192	0	1.16905	4.69042
peli-1	vlcEx835	225	daf-19(m86); daf-12(sa204)	25	10	1	Young Adult	4	0	0	0	0	4
peli-1	vlcEx835	225	daf-19(m86); daf-12(sa204)	25	10	2	Young Adult	4	1	0	0	1	6
peli-1	vlcEx835	225	daf-19(m86); daf-12(sa204)	25	10	3	Young Adult	5	1	1	0	2	9
peli-1	vlcEx835	225	daf-19(m86); daf-12(sa204)	25	10	4	Young Adult	6	1	1	0	1	9
peli-1	vlcEx835	225	daf-19(m86); daf-12(sa204)	25	10	5	Young Adult	4	1	1	0	0	6
peli-1	vlcEx835	225	daf-19(m86); daf-12(sa204)	25	10	6	Young Adult	3	1	0	0	1	5
peli-1	vlcEx835	225	daf-19(m86); daf-12(sa204)	25	10	7	Young Adult	3	2	0	0	1	6
peli-1	vlcEx835	225	daf-19(m86); daf-12(sa204)	25	10	8	Young Adult	4	1	0	0	1	6
peli-1	vlcEx835	225	daf-19(m86); daf-12(sa204)	25	10	9	Young Adult	5	2	1	0	1	9
peli-1	vlcEx835	225	daf-19(m86); daf-12(sa204)	25	10	10	Young Adult	3	3	0	0	1	7
peli-1	vlcEx835	225	daf-19(m86); daf-12(sa204)	25	10	ALL	Mean	4.1	1.3	0.4	0	0.9	6.7
peli-1	vlcEx835	225	daf-19(m86); daf-12(sa204)	25	10	ALL	SD	0.994429	0.823273	0.516398	0	0.567646	1.76698
peli-1	vlcEx824	1108	daf-19(m86); daf-12(sa204)	25	9	1	Young Adult	17	5	1	1	2	26
peli-1	vlcEx824	1108	daf-19(m86); daf-12(sa204)	25	9	2	Young Adult	14	11	2	2	2	31
peli-1	vlcEx824	1108	daf-19(m86); daf-12(sa204)	25	9	3	Young Adult	13	12	2	1	0	28
peli-1	vlcEx824	1108	daf-19(m86); daf-12(sa204)	25	9	4	Young Adult	13	11	2	1	0	27
peli-1	vlcEx824	1108	daf-19(m86); daf-12(sa204)	25	9	5	Young Adult	12	11	2	2	0	27
peli-1	vlcEx824	1108	daf-19(m86); daf-12(sa204)	25	9	6	Young Adult	13	10	2	1	0	26
peli-1	vlcEx824	1108	daf-19(m86); daf-12(sa204)	25	9	7	Young Adult	12	11	2	2	0	27
peli-1	vlcEx824	1108	daf-19(m86); daf-12(sa204)	25	9	8	Young Adult	14	12	2	2	0	30
peli-1	vlcEx824	1108	daf-19(m86); daf-12(sa204)	25	9	9	Young Adult	13	10	3	2	1	29
peli-1	vlcEx824	1108	daf-19(m86); daf-12(sa204)	25	9	ALL	Mean	13.4444	10.3333	2	1.55556	0.555556	27.8889
peli-1	vlcEx824	1108	daf-19(m86); daf-12(sa204)	25	9	ALL	SD	1.50923	2.12132	0.5	0.527046	0.881917	1.76383
peli-1	vlcEx835	225	daf-12(sa204)	25	9	1	Young Adult	7	12	1	0	5	25
peli-1	vlcEx835	225	daf-12(sa204)	25	9	2	Young Adult	8	12	2	0	4	26
peli-1	vlcEx835	225	daf-12(sa204)	25	9	3	Young Adult	4	11	2	0	4	21
peli-1	vlcEx835	225	daf-12(sa204)	25	9	4	Young Adult	6	12	0	0	5	23
peli-1	vlcEx835	225	daf-12(sa204)	25	9	5	Young Adult	6	12	2	0	5	25
peli-1	vlcEx835	225	daf-12(sa204)	25	9	6	Young Adult	6	12	2	0	4	24
peli-1	vlcEx835	225	daf-12(sa204)	25	9	7	Young Adult	6	11	1	0	5	23
peli-1	vlcEx835	225	daf-12(sa204)	25	9	8	Young Adult	5	11	2	0	5	23
peli-1	vlcEx835	225	daf-12(sa204)	25	9	9	Young Adult	5	11	2	0	5	23
peli-1	vlcEx835	225	daf-12(sa204)	25	9	ALL	Mean	5.88889	11.5556	1.55556	0	4.66667	23.6667
peli-1	vlcEx835	225	daf-12(sa204)	25	9	ALL	SD	1.16667	0.527046	0.726483	0	0.5	1.5
peli-1	vlcEx824	1108	daf-12(sa204)	25	8	1	Young Adult	19	18	2	2	4	45
peli-1	vlcEx824	1108	daf-12(sa204)	25	8	2	Young Adult	20	18	2	1	4	45
peli-1	vlcEx824	1108	daf-12(sa204)	25	8	3	Young Adult	18	18	2	0	3	41
peli-1	vlcEx824	1108	daf-12(sa204)	25	8	4	Young Adult	19	17	2	2	5	45
peli-1	vlcEx824	1108	daf-12(sa204)	25	8	5	Young Adult	19	18	2	2	4	45
peli-1	vlcEx824	1108	daf-12(sa204)	25	8	6	Young Adult	18	17	2	2	2	41
peli-1	vlcEx824	1108	daf-12(sa204)	25	8	7	Young Adult	19	14	2	2	3	40
peli-1	vlcEx824	1108	daf-12(sa204)	25	8	8	Young Adult	18	17	2	2	4	43
peli-1	vlcEx824	1108	daf-12(sa204)	25	8	ALL	Mean	18.75	17.125	2	1.625	3.625	43.125
peli-1	vlcEx824	1108	daf-12(sa204)	25	8	ALL	SD	0.707107	1.3562	0	0.744024	0.916125	2.16712
tmem-107	vlcEx1135	143	wild type	25	6	1	Young Adult	15	12	0	0	5	32
tmem-107	vlcEx1135	143	wild type	25	6	2	Young Adult	16	15	1	1	4	37
tmem-107	vlcEx1135	143	wild type	25	6	3	Young Adult	15	12	2	1	3	33
tmem-107	vlcEx1135	143	wild type	25	6	4	Young Adult	19	17	1	1	5	43
tmem-107	vlcEx1135	143	wild type	25	6	5	Young Adult	15	14	1	0	4	34
tmem-107	vlcEx1135	143	wild type	25	6	6	Young Adult	14	12	1	0	4	31
tmem-107	vlcEx1135	143	wild type	25	6	ALL	Mean	15.6667	13.6667	1	0.5	4.16667	35
tmem-107	vlcEx1135	143	wild type	25	6	ALL	SD	1.75119	2.06559	0.632456	0.547723	0.752773	4.42719
tmem-107	vlcEx1135	143	daf-19(m86); daf-12(sa204)	25	12	1	Young Adult	0	0	0	0	0	0
tmem-107	vlcEx1135	143	daf-19(m86); daf-12(sa204)	25	12	2	Young Adult	0	0	0	0	0	0
tmem-107	vlcEx1135	143	daf-19(m86); daf-12(sa204)	25	12	3	Young Adult	0	0	0	0	0	0
tmem-107	vlcEx1135	143	daf-19(m86); daf-12(sa204)	25	12	4	Young Adult	0	0	0	0	0	0
tmem-107	vlcEx1135	143	daf-19(m86); daf-12(sa204)	25	12	5	Young Adult	0	0	0	0	0	0
tmem-107	vlcEx1135	143	daf-19(m86); daf-12(sa204)	25	12	6	Young Adult	0	0	0	0	0	0
tmem-107	vlcEx1135	143	daf-19(m86); daf-12(sa204)	25	12	7	Young Adult	0	0	0	0	0	0
tmem-107	vlcEx1135	143	daf-19(m86); daf-12(sa204)	25	12	8	Young Adult	0	0	0	0	0	0
tmem-107	vlcEx1135	143	daf-19(m86); daf-12(sa204)	25	12	9	Young Adult	0	0	0	0	0	0
tmem-107	vlcEx1135	143	daf-19(m86); daf-12(sa204)	25	12	10	Young Adult	0	0	0	0	0	0
tmem-107	vlcEx1135	143	daf-19(m86); daf-12(sa204)	25	12	11	Young Adult	0	0	0	0	0	0
tmem-107	vlcEx1135	143	daf-19(m86); daf-12(sa204)	25	12	12	Young Adult	0	0	0	0	0	0
tmem-107	vlcEx1135	143	daf-19(m86); daf-12(sa204)	25	12	ALL	Mean	0	0	0	0	0	0
tmem-107	vlcEx1135	143	daf-19(m86); daf-12(sa204)	25	12	ALL	SD	0	0	0	0	0	0
tmem-107	vlcEx1135	143	daf-12(sa204)	25	10	1	Young Adult	8	10	0	0	5	23
tmem-107	vlcEx1135	143	daf-12(sa204)	25	10	2	Young Adult	8	7	0	0	5	20
tmem-107	vlcEx1135	143	daf-12(sa204)	25	10	3	Young Adult	7	6	0	0	5	18
tmem-107	vlcEx1135	143	daf-12(sa204)	25	10	4	Young Adult	9	6	1	0	5	21
tmem-107	vlcEx1135	143	daf-12(sa204)	25	10	5	Young Adult	7	9	0	0	5	21
tmem-107	vlcEx1135	143	daf-12(sa204)	25	10	6	Young Adult	12	6	2	0	5	25
tmem-107	vlcEx1135	143	daf-12(sa204)	25	10	7	Young Adult	7	6	1	0	3	17
tmem-107	vlcEx1135	143	daf-12(sa204)	25	10	8	Young Adult	8	7	1	0	2	18
tmem-107	vlcEx1135	143	daf-12(sa204)	25	10	9	Young Adult	12	11	2	0	5	30
tmem-107	vlcEx1135	143	daf-12(sa204)	25	10	10	Young Adult	11	12	2	0	4	29
tmem-107	vlcEx1135	143	daf-12(sa204)	25	10	ALL	Mean	8.9	8	0.9	0	4.4	22.2
tmem-107	vlcEx1135	143	daf-12(sa204)	25	10	ALL	SD	2.02485	2.3094	0.875595	0	1.07497	4.54117
tub-1	vlcEx821	424	wild type	25	10	1	Young Adult	22	21	3	2	5	53
tub-1	vlcEx821	424	wild type	25	10	2	Young Adult	20	23	2	2	5	52
tub-1	vlcEx821	424	wild type	25	10	3	Young Adult	22	23	3	2	4	54
tub-1	vlcEx821	424	wild type	25	10	4	Young Adult	18	23	2	2	4	49
tub-1	vlcEx821	424	wild type	25	10	5	Young Adult	22	22	1	1	5	51
tub-1	vlcEx821	424	wild type	25	10	6	Young Adult	22	26	3	2	5	58
tub-1	vlcEx821	424	wild type	25	10	7	Young Adult	20	24	3	2	5	54
tub-1	vlcEx821	424	wild type	25	10	8	Young Adult	21	21	1	2	5	50
tub-1	vlcEx821	424	wild type	25	10	9	Young Adult	22	25	3	2	3	55
tub-1	vlcEx821	424	wild type	25	10	10	Young Adult	20	25	2	2	3	52
tub-1	vlcEx821	424	wild type	25	10	ALL	Mean	20.9	23.3	2.3	1.9	4.4	52.8
tub-1	vlcEx821	424	wild type	25	10	ALL	SD	1.37032	1.70294	0.823273	0.316228	0.843274	2.61619
tub-1	vlcEx821	424	daf-19(m86); daf-12(sa204)	25	11	1	Young Adult	12	6	2	1	5	26
tub-1	vlcEx821	424	daf-19(m86); daf-12(sa204)	25	11	2	Young Adult	9	7	6	2	5	29
tub-1	vlcEx821	424	daf-19(m86); daf-12(sa204)	25	11	3	Young Adult	7	7	3	1	5	23
tub-1	vlcEx821	424	daf-19(m86); daf-12(sa204)	25	11	4	Young Adult	7	5	5	1	6	24
tub-1	vlcEx821	424	daf-19(m86); daf-12(sa204)	25	11	5	Young Adult	6	8	3	2	7	26
tub-1	vlcEx821	424	daf-19(m86); daf-12(sa204)	25	11	6	Young Adult	8	7	4	1	7	27
tub-1	vlcEx821	424	daf-19(m86); daf-12(sa204)	25	11	7	Young Adult	9	8	2	2	7	28
tub-1	vlcEx821	424	daf-19(m86); daf-12(sa204)	25	11	8	Young Adult	5	7	5	1	7	25
tub-1	vlcEx821	424	daf-19(m86); daf-12(sa204)	25	11	9	Young Adult	5	6	5	1	7	24
tub-1	vlcEx821	424	daf-19(m86); daf-12(sa204)	25	11	10	Young Adult	6	6	3	2	4	21
tub-1	vlcEx821	424	daf-19(m86); daf-12(sa204)	25	11	11	Young Adult	9	7	3	1	6	26
tub-1	vlcEx821	424	daf-19(m86); daf-12(sa204)	25	11	ALL	Mean	7.54545	6.72727	3.72727	1.36364	6	25.3636
tub-1	vlcEx821	424	daf-19(m86); daf-12(sa204)	25	11	ALL	SD	2.11488	0.904534	1.3484	0.504525	1.09545	2.29228
tub-1	vlcEx821	424	daf-12(sa204)	25	10	1	Young Adult	23	24	3	2	5	57
tub-1	vlcEx821	424	daf-12(sa204)	25	10	2	Young Adult	18	21	5	2	4	50
tub-1	vlcEx821	424	daf-12(sa204)	25	10	3	Young Adult	20	20	4	2	2	48
tub-1	vlcEx821	424	daf-12(sa204)	25	10	4	Young Adult	23	20	5	2	5	55
tub-1	vlcEx821	424	daf-12(sa204)	25	10	5	Young Adult	20	19	4	2	5	50
tub-1	vlcEx821	424	daf-12(sa204)	25	10	6	Young Adult	19	23	3	2	5	52
tub-1	vlcEx821	424	daf-12(sa204)	25	10	7	Young Adult	21	23	3	2	5	54
tub-1	vlcEx821	424	daf-12(sa204)	25	10	8	Young Adult	22	23	3	2	5	55
tub-1	vlcEx821	424	daf-12(sa204)	25	10	9	Young Adult	20	23	5	2	5	55
tub-1	vlcEx821	424	daf-12(sa204)	25	10	10	Young Adult	20	23	5	2	5	55
tub-1	vlcEx821	424	daf-12(sa204)	25	10	ALL	Mean	20.6	21.9	4	2	4.6	53.1
tub-1	vlcEx821	424	daf-12(sa204)	25	10	ALL	SD	1.64655	1.72884	0.942809	0	0.966092	2.92309
xbx-1	vlcEx1137	105	wild type	25	5	1	Young Adult	19	17	3	2	5	46
xbx-1	vlcEx1137	105	wild type	25	5	2	Young Adult	17	16	2	2	5	42
xbx-1	vlcEx1137	105	wild type	25	5	3	Young Adult	20	21	3	2	5	51
xbx-1	vlcEx1137	105	wild type	25	5	4	Young Adult	20	22	3	1	3	49
xbx-1	vlcEx1137	105	wild type	25	5	5	Young Adult	21	17	2	1	5	46
xbx-1	vlcEx1137	105	wild type	25	5	ALL	Mean	19.4	18.6	2.6	1.6	4.6	46.8
xbx-1	vlcEx1137	105	wild type	25	5	ALL	SD	1.51658	2.70185	0.547723	0.547723	0.894427	3.42053
xbx-1	vlcEx822	370	wild type	25	5	1	Young Adult	21	26	2	2	5	56
xbx-1	vlcEx822	370	wild type	25	5	2	Young Adult	18	21	3	1	3	46
xbx-1	vlcEx822	370	wild type	25	5	3	Young Adult	20	25	2	1	5	53
xbx-1	vlcEx822	370	wild type	25	5	4	Young Adult	20	24	2	1	5	52
xbx-1	vlcEx822	370	wild type	25	5	5	Young Adult	21	25	2	1	4	53
xbx-1	vlcEx822	370	wild type	25	5	ALL	Mean	20	24.2	2.2	1.2	4.4	52
xbx-1	vlcEx822	370	wild type	25	5	ALL	SD	1.22474	1.92354	0.447214	0.447214	0.894427	3.67423
xbx-1	vlcEx1137	105	daf-19(m86); daf-12(sa204)	25	12	1	Young Adult	4	0	0	0	2	6
xbx-1	vlcEx1137	105	daf-19(m86); daf-12(sa204)	25	12	2	Young Adult	4	0	0	0	2	6
xbx-1	vlcEx1137	105	daf-19(m86); daf-12(sa204)	25	12	3	Young Adult	7	0	0	0	0	7
xbx-1	vlcEx1137	105	daf-19(m86); daf-12(sa204)	25	12	4	Young Adult	5	0	2	1	1	9
xbx-1	vlcEx1137	105	daf-19(m86); daf-12(sa204)	25	12	5	Young Adult	6	0	0	0	0	6
xbx-1	vlcEx1137	105	daf-19(m86); daf-12(sa204)	25	12	6	Young Adult	5	0	1	0	1	7
xbx-1	vlcEx1137	105	daf-19(m86); daf-12(sa204)	25	12	7	Young Adult	4	0	0	1	1	6
xbx-1	vlcEx1137	105	daf-19(m86); daf-12(sa204)	25	12	8	Young Adult	4	0	0	0	1	5
xbx-1	vlcEx1137	105	daf-19(m86); daf-12(sa204)	25	12	9	Young Adult	6	0	1	0	1	8
xbx-1	vlcEx1137	105	daf-19(m86); daf-12(sa204)	25	12	10	Young Adult	4	0	0	0	1	5
xbx-1	vlcEx1137	105	daf-19(m86); daf-12(sa204)	25	12	11	Young Adult	4	0	0	1	0	5
xbx-1	vlcEx1137	105	daf-19(m86); daf-12(sa204)	25	12	12	Young Adult	6	0	0	0	2	8
xbx-1	vlcEx1137	105	daf-19(m86); daf-12(sa204)	25	12	ALL	Mean	4.91667	0	0.333333	0.25	1	6.5
xbx-1	vlcEx1137	105	daf-19(m86); daf-12(sa204)	25	12	ALL	SD	1.08362	0	0.651339	0.452267	0.738549	1.31426
xbx-1	vlcEx822	370	daf-19(m86); daf-12(sa204)	25	12	1	Young Adult	10	4	2	2	5	23
xbx-1	vlcEx822	370	daf-19(m86); daf-12(sa204)	25	12	2	Young Adult	9	5	2	2	4	22
xbx-1	vlcEx822	370	daf-19(m86); daf-12(sa204)	25	12	3	Young Adult	10	4	0	1	1	16
xbx-1	vlcEx822	370	daf-19(m86); daf-12(sa204)	25	12	4	Young Adult	11	2	2	1	3	19
xbx-1	vlcEx822	370	daf-19(m86); daf-12(sa204)	25	12	5	Young Adult	9	4	2	2	4	21
xbx-1	vlcEx822	370	daf-19(m86); daf-12(sa204)	25	12	6	Young Adult	8	4	2	1	2	17
xbx-1	vlcEx822	370	daf-19(m86); daf-12(sa204)	25	12	7	Young Adult	8	6	2	2	5	23
xbx-1	vlcEx822	370	daf-19(m86); daf-12(sa204)	25	12	8	Young Adult	10	3	2	2	5	22
xbx-1	vlcEx822	370	daf-19(m86); daf-12(sa204)	25	12	9	Young Adult	9	5	2	2	5	23
xbx-1	vlcEx822	370	daf-19(m86); daf-12(sa204)	25	12	10	Young Adult	11	4	2	2	3	22
xbx-1	vlcEx822	370	daf-19(m86); daf-12(sa204)	25	12	11	Young Adult	12	3	2	2	5	24
xbx-1	vlcEx822	370	daf-19(m86); daf-12(sa204)	25	12	12	Young Adult	11	4	1	2	3	21
xbx-1	vlcEx822	370	daf-19(m86); daf-12(sa204)	25	12	ALL	Mean	9.83333	4	1.75	1.75	3.75	21.0833
xbx-1	vlcEx822	370	daf-19(m86); daf-12(sa204)	25	12	ALL	SD	1.2673	1.04447	0.621582	0.452267	1.3568	2.50303
xbx-1	vlcEx1137	105	daf-12(sa204)	25	5	1	Young Adult	18	16	0	2	3	39
xbx-1	vlcEx1137	105	daf-12(sa204)	25	5	2	Young Adult	19	15	3	2	4	43
xbx-1	vlcEx1137	105	daf-12(sa204)	25	5	3	Young Adult	16	15	3	1	4	39
xbx-1	vlcEx1137	105	daf-12(sa204)	25	5	4	Young Adult	19	20	6	2	4	51
xbx-1	vlcEx1137	105	daf-12(sa204)	25	5	5	Young Adult	17	16	3	2	3	41
xbx-1	vlcEx1137	105	daf-12(sa204)	25	5	ALL	Mean	17.8	16.4	3	1.8	3.6	42.6
xbx-1	vlcEx1137	105	daf-12(sa204)	25	5	ALL	SD	1.30384	2.07364	2.12132	0.447214	0.547723	4.97996
xbx-1	vlcEx822	370	daf-12(sa204)	25	6	1	Young Adult	22	20	3	2	4	51
xbx-1	vlcEx822	370	daf-12(sa204)	25	6	2	Young Adult	20	21	3	2	5	51
xbx-1	vlcEx822	370	daf-12(sa204)	25	6	3	Young Adult	19	19	2	2	4	46
xbx-1	vlcEx822	370	daf-12(sa204)	25	6	4	Young Adult	20	18	2	2	4	46
xbx-1	vlcEx822	370	daf-12(sa204)	25	6	5	Young Adult	18	21	3	2	5	49
xbx-1	vlcEx822	370	daf-12(sa204)	25	6	6	Young Adult	19	20	3	2	4	48
xbx-1	vlcEx822	370	daf-12(sa204)	25	6	ALL	Mean	19.6667	19.8333	2.66667	2	4.33333	48.5
xbx-1	vlcEx822	370	daf-12(sa204)	25	6	ALL	SD	1.36626	1.16905	0.516398	0	0.516398	2.25832

## Sheet: F1C and F1S2 pval
REPORTERS (expression defects)															Bonferroni
															0.0166667
Background 1	Background 2	che-11	che-13	ift-20	mks-1	osm-1	osm-5	peli-1s	peli-1l	tmem-107	tub-1	xbx-1s	xbx-1l
wild type	daf-12(sa204)	0.891534	0.0118392	3.77206e-08	0.00161657	1.06277e-05	0.0566663	0.128701	0.334193	7.72195e-05	0.811642	0.158675	0.0836653
wild type	daf-19(m86); daf-12(sa204)	9.03899e-09	4.75128e-23	6.40302e-18	9.45772e-15	1.56511e-19	4.85492e-17	1.39392e-11	0.000147086	6.7748e-06	3.39012e-16	4.78296e-06	2.56072e-12
daf-12(sa204)	daf-19(m86); daf-12(sa204)	1.31729e-13	5.91998e-08	1.15269e-13	1.25332e-07	3.00622e-17	1.28429e-07	4.57831e-14	7.93041e-11	8.67976e-08	8.85816e-16	6.04311e-05	1.46997e-13
