# Supplementary material for: Forkhead transcription factor FKH-8 cooperates with RFX in the direct regulation of sensory cilia in Caenorhabditis elegans
Source: eLife. 2023 Jul 14;12:e89702. doi: 10.7554/eLife.89702 (PMC10393296; doi:10.7554/eLife.89702)
Supplement: Figure 1—source data 2. [file elife-89702-fig1-data2.xlsx]

## Sheet: Ciliome Genes
Gene	WormBase Gene ID	Category	Celullar Component	Biological Process	Burghoorn et al.	Curation	Reference ID
aqp-6	WBGene00000174	Subtype-specific	X				17
arl-13	WBGene00021349	Core	X				5, 6, 18, 28, 30, 37
daf-11	WBGene00000907	Subtype-specific	X				3, 4, 8, 13, 19, 41, 46
gpa-13	WBGene00001675	Subtype-specific	X				13, 22
asb-1	WBGene00000206	Male	X				50
asg-2	WBGene00000210	Male	X				50
asic-1	WBGene00022815	Subtype-specific				X	44
asic-2	WBGene00012137	Subtype-specific			X		7
atp-2	WBGene00000229	Male	X				18, 50
bbs-1	WBGene00000241	Core	X		X		5, 6, 7, 12, 18, 20, 26, 40, 42
bbs-2	WBGene00000242	Core	X		X		5, 7, 12, 18, 20, 26, 51
bbs-4	WBGene00043992	Core	X				20, 54
bbs-5	WBGene00010974	Core	X		X		2, 5, 7, 18, 20, 54
bbs-8	WBGene00000244	Core	X		X		6, 7, 12, 14, 18, 20, 23, 26, 37, 38, 40, 55
bbs-9	WBGene00016744	Core	X				5, 20, 51
ccep-290	WBGene00021643	Core	X				30
cdkl-1	WBGene00012779	Expression	X				30
cfap-36	WBGene00022435	Core				X	23
che-10	WBGene00018051	Core	X	X			8, 13, 20, 40
che-11	WBGene00000490	Core	X		X		5, 7, 8, 11, 12, 18, 20, 22, 23, 31, 37, 39, 40, 42, 51, 55
che-12	WBGene00000491	Core		X			3, 8, 20,
che-13	WBGene00000492	Core	X		X		5, 7, 8, 12, 20, 22, 30, 40, 42, 59, 55
che-2	WBGene00000484	Core	X		X		5, 7, 8, 12, 13, 20, 22, 26, 40, 42, 46, 51
che-3	WBGene00000485	Core	X				3, 8, 13, 20, 22, 31, 46, 59
cil-1	WBGene00086546	Male	X				2
cil-7	WBGene00021017	Male	X				32
clhm-1	WBGene00016626	Subtype-specific	X				47
clic-1	WBGene00020246	Core	X				18
cng-3	WBGene00000563	Subtype-specific	X				24, 53
cwp-5	WBGene00009844	Male	X				34
daf-10	WBGene00000906	Core	X				3, 6, 20, 41, 46
gpa-3	WBGene00001665	Subtype-specific	X				6, 13
pef-1	WBGene00003969	Subtype-specific	X				43
daf-37	WBGene00016246	Subtype-specific	X				41
dcar-1	WBGene00007395	Subtype-specific	X				1
dli-1	WBGene00001007	Core				X	5, 31,
dyci-1	WBGene00015927	Core				X	31
dyf-1	WBGene00001117	Core	X				5, 14, 20, 22, 31, 40, 55
dyf-11	WBGene00001127	Core	X		X		5, 18, 20, 26, 30, 39, 40
dyf-13	WBGene00001129	Core	X		X		5, 7, 20, 55
dyf-17	WBGene00012673	Expression	X				42
dyf-19	WBGene00012826	Core	X	X			51
dyf-2	WBGene00001118	Core	X		X		5, 7, 18, 20, 40, 51
dyf-3	WBGene00001119	Core	X		X		7, 18, 20, 40
dyf-5	WBGene00001121	Core	X		X		7, 18, 20, 40
dyf-6	WBGene00001122	Core	X				14, 20, 40
dyf-7	WBGene00001123	Core				X	18, 20, 40
dylt-2	WBGene00017014	Core	X				5, 18,20
flp-17	WBGene00001460	Expression				X	25
gar-2	WBGene00001518	Subtype-specific				X	29
gasr-8	WBGene00008144	Expression			X		5, 7
gcy-1	WBGene00001528	Subtype-specific				X	4, 19, 39 ,52
gcy-12	WBGene00001538	Subtype-specific	X				4, 19, 52
gcy-14	WBGene00001540	Subtype-specific	X				4, 19, 39 ,52
gcy-15	WBGene00001541	Subtype-specific				X	19, 39
gcy-18	WBGene00001543	Subtype-specific	X				18, 19, 24, 37, 39
gcy-19	WBGene00001544	Subtype-specific				X	19, 39
gcy-2	WBGene00001529	Subtype-specific				X	4, 19, 39 ,52
gcy-20	WBGene00001545	Subtype-specific				X	19, 39
gcy-21	WBGene00001546	Subtype-specific				X	4, 19,39
gcy-22	WBGene00001547	Subtype-specific				X	4, 19
gcy-23	WBGene00001548	Subtype-specific	X				13, 19, 37, 39
gcy-27	WBGene00001550	Subtype-specific				X	19, 39
gcy-29	WBGene00007314	Subtype-specific				X	19, 39
gcy-3	WBGene00001530	Subtype-specific				X	4, 19, 39 ,52
gcy-31	WBGene00001551	Subtype-specific				X	13, 52
gcy-33	WBGene00001553	Subtype-specific				X	13, 52
gcy-4	WBGene00001531	Subtype-specific				X	4, 19, 39 ,52
gcy-5	WBGene00001532	Subtype-specific				X	4, 8, 13, 18, 19, 21, 39, 46, 52
gcy-6	WBGene00001533	Subtype-specific				X	4, 8, 19, 26, 52
gcy-7	WBGene00001534	Subtype-specific				X	4, 8, 19, 52
gcy-8	WBGene00001535	Subtype-specific	X				19, 24, 33, 37, 46, 52
gcy-9	WBGene00001536	Subtype-specific	X				4, 19, 39 ,52
peli-1	WBGene00017766	Core				X	10, 18
pitp-1	WBGene00010813	Subtype-specific	X				21
hyls-1	WBGene00015466	Core	X				11
ift-139	WBGene00022696	Core	X		X		5, 7
ift-20	WBGene00022465	Core	X		X		7, 18, 20, 40, 51,
ift-74	WBGene00016005	Core	X				14, 20
ift-81	WBGene00017973	Core	X				5, 14, 18, 20
ifta-1	WBGene00016935	Core	X				5, 18, 20
ifta-2	WBGene00012132	Core	X				20
jbts-14	WBGene00018727	Core	X				26, 28
K07C11.10	WBGene00019482	Expression	X				26
kap-1	WBGene00002182	Core	X				6, 20, 22, 38, 42, 51, 55
kin-10	WBGene00002196	Male	X				15
klp-11	WBGene00002222	Core				X	14, 20
klp-20	WBGene00002230	Core		X			18, 20
klp-6	WBGene00002218	Male	X				18, 20, 32
lov-1	WBGene00003058	Male	X				2, 3, 15, 20, 32, 34
mks-1	WBGene00020100	Core	X	X	X		6, 7, 12, 20, 28, 39
mks-2	WBGene00194710	Core	X	X			28, 30
mks-3	WBGene00018042	Core	X		X		5, 7, 20, 28, 30, 39, 42, 51
mks-5	WBGene00007490	Core	X				6, 28, 30, 37, 39, 51
mks-6	WBGene00010642	Core	X	X			5, 18, 28, 37, 39,51
mksr-1	WBGene00019364	Core	X	X	X		5, 6, 7, 18, 28, 30, 39
mksr-2	WBGene00021416	Core	X	X	X		5, 6, 7, 28, 30, 38, 39
nphp-1	WBGene00010898	Core	X		X		7, 18, 26, 30, 37, 39, 51, 55
nphp-2	WBGene00021304	Core	X	X			5, 6, 37
nphp-4	WBGene00011261	Core	X		X		6, 7, 11, 26, 28, 30, 38, 39, 55
nsy-4	WBGene00021415	Subtype-specific	X				59
nubp-1	WBGene00008664	Core	X				27
nud-1	WBGene00003829	Expression			X		7, 12
ocr-1	WBGene00003838	Subtype-specific				X	35, 48
ocr-2	WBGene00003839	Subtype-specific	X				1, 13, 20, 22, 48
ocr-4	WBGene00003841	Subtype-specific				X	35, 48
odr-1	WBGene00003848	Subtype-specific	X				3, 4, 8, 19, 24, 59, 52
odr-10	WBGene00003856	Subtype-specific	X				2, 3, 26, 42, 46
odr-3	WBGene00003850	Subtype-specific	X				1, 3, 8, 13, 18, 46, 59
rbg-3	WBGene00007167	Core				X	36
tax-6	WBGene00006527	Expression	X				8, 13, 15, 18, 22, 37
osm-1	WBGene00003883	Core	X		X		3, 5, 7, 12, 18, 20, 46
osm-12	WBGene00003892	Core	X		X		3, 5, 7, 12, 18, 20, 22, 37, 40, 55
osm-3	WBGene00003884	Core	X				3, 5, 6, 8, 13, 14, 20, 22, 31, 38, 42, 46, 51, 55
osm-5	WBGene00003885	Core	X		X		3, 5, 7, 10, 11, 12, 13, 20, 37, 39, 40, 42, 51, 55
osm-6	WBGene00003886	Core	X		X		2, 3, 5, 7, 8, 11, 12, 13, 14, 20, 31, 38, 46, 59, 51, 55
osm-9	WBGene00003889	Subtype-specific	X				1, 2 ,9, 13, 14, 20, 22 42, 46, 48
arl-3	WBGene00000188	Core				X	5, 6, 12
arl-6	WBGene00000193	Core	X				18, 20
daf-25	WBGene00000917	Expression	X				6, 37
odr-4	WBGene00003851	Subtype-specific		X	X		3, 6, 7, 12, 13, 46
pkd-2	WBGene00004035	Subtype-specific	X				2, 3, 15, 20, 32, 34, 42, 55
rab-8	WBGene00004272	Core				X	6, 38
odr-8	WBGene00018160	Subtype-specific		X			16, 18
rpi-2	WBGene00019536	Core	X				5, 28, 30, 39
srab-16	WBGene00020060	Subtype-specific	X				6, 18
srbc-64	WBGene00021477	Subtype-specific	X				6, 38
srbc-66	WBGene00020746	Subtype-specific	X				38
srd-23	WBGene00005101	Subtype-specific	X				6, 38
srg-2	WBGene00005160	Subtype-specific				X	12, 42
srg-36	WBGene00005193	Subtype-specific	X				33, 38
srg-37	WBGene00005194	Subtype-specific				X	33
srsx-3	WBGene00022408	Subtype-specific	X				6
sru-38	WBGene00005701	Subtype-specific	X				6, 18
str-1	WBGene00006069	Subtype-specific	X				6, 12, 38, 46
str-112	WBGene00006163	Subtype-specific				X	16
str-113	WBGene00006164	Subtype-specific				X	16
str-163	WBGene00006208	Subtype-specific	X				6, 18
str-2	WBGene00006070	Subtype-specific	X				8, 59
str-44	WBGene00006109	Subtype-specific	X				6, 12
sulp-2	WBGene00017464	Subtype-specific	X				45
tax-2	WBGene00006525	Subtype-specific	X				8, 13, 18, 22, 24, 38, 53
tax-4	WBGene00006526	Subtype-specific	X				4, 8, 13, 18, 19, 37, 53
osta-1	WBGene00015287	Core	X				38
tba-5	WBGene00006531	Core	X				14
tba-6	WBGene00006532	Core				X	5
tbb-4	WBGene00006538	Core	X				14
tmc-1	WBGene00020490	Subtype-specific	X				9
tmem-107	WBGene00043308	Core	X	X			28
tmem-138	WBGene00008643	Core	X				30
tmem-17	WBGene00022733	Core	X				28, 30,42
tmem-218	WBGene00044771	Core	X	X			30
tmem-231	WBGene00020825	Core	X	X			28, 30, 42
tram-1	WBGene00007696	Subtype-specific	X				28, 30, 39
trp-4	WBGene00006616	Subtype-specific				X	35
trpa-1	WBGene00007801	Subtype-specific	X				18, 35
tub-1	WBGene00006655	Core	X		X		6, 7, 12, 20, 36, 46
xbx-1	WBGene00006960	Core	X		X		7, 12, 20, 28, 30, 31, 37, 39, 51
xbx-3	WBGene00010864	Expression			X		7, 12
xbx-4	WBGene00016025	Expression			X		7, 12
xbx-5	WBGene00011974	Expression			X		7, 12
xbx-6	WBGene00009580	Expression			X		7, 12, 18
xbx-9	WBGene00007604	Expression			X		7

## Sheet: Ciliome References
Reference ID	Reference	DOI	PMC ID
1	A seven-transmembrane receptor that mediates avoidance response to dihydrocaffeic acid, a water-soluble repellent in Caenorhabditis elegans.	https://doi.org/10.1523/jneurosci.4018-11.2011
2	The CIL-1 PI 5-phosphatase localizes TRP Polycystins to cilia and activates sperm in C. elegans.	https://doi.org/10.1016/j.cub.2009.08.045
3	A polycystic kidney-disease gene homologue required for male mating behaviour in C. elegans.	https://doi.org/10.1038/43913
4	A transmembrane guanylyl cyclase (DAF-11) and Hsp90 (DAF-21) regulate a common set of chemosensory behaviors in caenorhabditis elegans.		http://www.ncbi.nlm.nih.gov/pmc/articles/pmc1461074/
5	Functional genomics of the cilium, a sensory organelle.	https://doi.org/10.1016/j.cub.2005.04.059
6	Diverse cell type-specific mechanisms localize G protein-coupled receptors to Caenorhabditis elegans sensory cilia.	https://doi.org/10.1534/genetics.114.161349
7	The in vivo dissection of direct RFX-target gene promoters in C. elegans reveals a novel cis-regulatory element, the C-box	https://doi.org/10.1016/j.ydbio.2012.05.033
8	A transcriptional regulatory cascade that controls left/right asymmetry in chemosensory neurons of C. elegans.	https://doi.org/10.1101/gad.1117903
9	tmc-1 encodes a sodium-sensitive channel required for salt chemosensation in C. elegans.	https://doi.org/10.1038/nature11845
10	An ER complex of ODR-4 and ODR-8/Ufm1 specific protease 2 promotes GPCR maturation by a Ufm1-independent mechanism.	https://doi.org/10.1371/journal.pgen.1004082
11	The hydrolethalus syndrome protein HYLS-1 links core centriole structure to cilia formation.	https://doi.org/10.1101/gad.1810409
12	Analysis of xbx genes in C. elegans.	https://doi.org/10.1242/dev.01775
13	Acute carbon dioxide avoidance in Caenorhabditis elegans.	https://doi.org/10.1073/pnas.0707469105
14	Intraflagellar transport delivers tubulin isotypes to sensory cilium middle and distal segments.	https://doi.org/10.1038/ncb2268
15	Casein kinase II and calcineurin modulate TRPP function and ciliary localization.	https://doi.org/10.1091/mbc.e05-10-0935
16	ATP-2 interacts with the PLAT domain of LOV-1 and is involved in Caenorhabditis elegans polycystin signaling.	https://doi.org/10.1091/mbc.e04-09-0851
17	Functional analysis of the aquaporin gene family in Caenorhabditis elegans.	https://doi.org/10.1152/ajpcell.00514.2006
18	High-throughput in vivo analysis of gene expression in Caenorhabditis elegans.	https://doi.org/10.1371/journal.pbio.0050237
19	Identification of guanylyl cyclases that function in thermosensory neurons of Caenorhabditis elegans.	https://doi.org/10.1534/genetics.105.050013
20	The sensory cilia of Caenorhabditis elegans.	https://doi.org/10.1895/wormbook.1.126.2
21	Roles for class IIA phosphatidylinositol transfer protein in neurotransmission and behavioral plasticity at the sensory neuron synapses of Caenorhabditis elegans.	https://doi.org/10.1073/pnas.1016232108
22	The Caenorhabditis elegans nephrocystins act as global modifiers of cilium structure.	https://doi.org/10.1083/jcb.200707090
23	Whole-Organism Developmental Expression Profiling Identifies RAB-28 as a Novel Ciliary GTPase Associated with the BBSome and Intraflagellar Transport.	https://doi.org/10.1371/journal.pgen.1006469
24	Co-expression of the transcription factors CEH-14 and TTX-1 regulates AFD neuron-specific genes gcy-8 and gcy-18 in C. elegans.	https://doi.org/10.1016/j.ydbio.2015.01.010
25	Expression and regulation of an FMRFamide-related neuropeptide gene family in Caenorhabditis elegans.	https://doi.org/10.1002/cne.20189
26	Identification of ciliated sensory neuron-expressed genes in Caenorhabditis elegans using targeted pull-down of poly(A) tails.	https://doi.org/10.1186/gb-2005-6-2-r17
27	The nucleotide-binding proteins Nubp1 and Nubp2 are negative regulators of ciliogenesis.	https://doi.org/10.1007/s00018-013-1401-6
28	TMEM107 recruits ciliopathy proteins to subdomains of the ciliary transition zone and causes Joubertsyndrome.	https://doi.org/10.1038/ncb3273
29	Characterization of GAR-2, a novel G protein-linked acetylcholine receptor from Caenorhabditis elegans.	https://doi.org/10.1046/j.1471-4159.2000.0751800.x
30	MKS5 and CEP290 Dependent Assembly Pathway of the Ciliary Transition Zone.	https://doi.org/10.1371/journal.pbio.1002416
31	Somatic CRISPR-Cas9-induced mutations reveal roles of embryonically essential dynein chains in Caenorhabditis elegans cilia.	https://doi.org/10.1083/jcb.201411041
32	Myristoylated CIL-7 regulates ciliary extracellular vesicle biogenesis.	https://doi.org/10.1091/mbc.e15-01-0009
33	Parallel evolution of domesticated Caenorhabditis species targets pheromone receptor genes.	https://doi.org/10.1038/nature10378
34	A latent capacity of the C. elegans polycystins to disrupt sensory transduction is repressed by the single-pass ciliary membrane protein CWP-5.	https://doi.org/10.1242/dmm.002816
35	Intraflagellar transport/Hedgehog-related signaling components couple sensory cilium morphology and serotonin biosynthesis in Caenorhabditis elegans.	https://doi.org/10.1523/jneurosci.0044-09.2009
36	C. elegans tubby regulates life span and fat storage by two independent mechanisms.	https://doi.org/10.1016/j.cmet.2005.06.004
37	Ciliopathy proteins establish a bipartite signaling compartment in a C. elegans thermosensory neuron.	https://doi.org/10.1242/jcs.157610
38	Transmembrane protein OSTA-1 shapes sensory cilia morphology via regulation of intracellular membrane trafficking in C. elegans.	https://doi.org/10.1242/dev.086249
39	Searching for neuronal left/right asymmetry: genomewide analysis of nematode receptor-type guanylyl cyclases.	https://doi.org/10.1534/genetics.106.055749
40	Sensory ciliogenesis in Caenorhabditis elegans: assignment of IFT components into distinct modules based on transport and phenotypic profiles.	https://doi.org/10.1091/mbc.e06-09-0805
41	Interaction of structure-specific and promiscuous G-protein-coupled receptors mediates small-molecule signaling in Caenorhabditis elegans.	https://doi.org/10.1073/pnas.1202216109
42	Transcriptional profiling of C. elegans DAF-19 uncovers a ciliary base-associated protein and a CDK/CCRK/LF2p-related kinase required for intraflagellar transport.	https://doi.org/10.1016/j.ydbio.2011.06.028
43	Cellular and subcellular localization, N-terminal acylation, and calcium binding of Caenorhabditis elegans protein phosphatase with EF-hands.	https://doi.org/10.1074/jbc.m011712200
44	Humidity sensation requires both mechanosensory and thermosensory pathways in Caenorhabditis elegans.	https://doi.org/10.1073/pnas.1322512111
45	The abts and sulp families of anion transporters from Caenorhabditis elegans.	https://doi.org/10.1152/ajpcell.00071.2005
46	The RFX-type transcription factor DAF-19 regulates sensory neuron cilium formation in C. elegans.	https://doi.org/10.1016/s1097-2765(00)80436-0
47	CLHM-1 is a functionally conserved and conditionally toxic Ca2+-permeable ion channel in Caenorhabditis elegans.	https://doi.org/10.1523/jneurosci.5919-12.2013
48	Combinatorial expression of TRPV channel proteins defines their sensory functions and subcellular localization in C. elegans neurons.	https://doi.org/10.1016/s0896-6273(02)00757-2
49	The claudin superfamily protein nsy-4 biases lateral signaling to generate left-right asymmetry in C. elegans olfactory neurons.	https://doi.org/10.1016/j.neuron.2006.06.029
50	Evolutionarily conserved, multitasking TRP channels: lessons from worms and flies.	https://doi.org/10.1007/978-3-319-05161-1_9
51	Transition fibre protein FBF1 is required for the ciliary entry of assembled intraflagellar transport complexes.	https://doi.org/10.1038/ncomms3750
52	MKS and NPHP modules cooperate to establish basal body/transition zone membrane associations and ciliary gate function during ciliogenesis.	https://doi.org/10.1083/jcb.201012116
53	Cell- and subunit-specific mechanisms of CNG channel ciliary trafficking and localization in C. elegans.	https://doi.org/10.1242/jcs.127274
54	BBS4 and BBS5 show functional redundancy in the BBSome to regulate the degradative sorting of ciliary sensory receptors.	https://doi.org/10.1038/srep11855
55	Guanylyl cyclase expression in specific sensory neurons: a new family of chemosensory receptors.	https://doi.org/10.1073/pnas.94.7.3384

## Sheet: F1 F
Gene	Body wall muscle	Intestinal/rectal muscle	Pharyngeal muscle	Pharyngeal epithelia	Pharyngeal gland	Seam cells	Non-seam hypodermis	Rectum	Ciliated sensory neurons	Oxygen sensory neurons	Touch receptor neurons	Cholinergic neurons	GABAergic neurons	Pharyngeal neurons	flp-1(+) interneurons	Other interneurons	Canal associated neurons	Am/PH sheath cells	Socket cells	Excretory cells	Intestine	Germline	Somatic gonad precursors	Distal tip cells	Vulval precursors	Sex myoblasts	Coelomocytes
fkh-8	0.000821121	0	0.0132858	0.0024839	0	0	0	0	0.861066	0.0368721	0	0	0	0	0.0392704	0.0361849	0	0	0.00968382	0	0	0.000331727	0	0	0	0	0
nhr-38	0.000179884	0	0	0	0	0.00388273	0	0	0.995562	0	0	0	0	0	0	0	0	0	0	0	0	0.000375405	0	0	0	0	0
nhr-124	0.00217595	0	0.0213316	0	0	0.00528729	0	0	0.945919	0	0	0.0211968	0	0	0	0	0	0	0	0	0	0.004089	0	0	0	0	0
ceh-57	0.00119394	0	0	0	0	0	0	0	0.911981	0.060452	0	0	0	0	0	0	0.0186017	0	0	0	0.0028549	0.000552768	0	0	0.00436391	0	0
nhr-158	6.02401e-05	0	0	0.0102318	0	0	0	0	0.875456	0.0359295	0	0.0131917	0	0	0	0	0	0.0651306	0	0	0	0	0	0	0	0	0
nhr-30	0.00185774	0	0	0	0	0.00217949	0.00674551	0	0.986226	0	0	0	0	0	0	0	0	0	0	0	0	0.00299147	0	0	0	0	0
nhr-188	0.00478595	0	0	0	0	0.0235572	0.0247875	0	0.91479	0	0	0	0	0	0	0	0	0	0	0	0.0160552	0.00185829	0.0141662	0	0	0	0
nhr-216	0.000801223	0	0	0	0	0.00408129	0	0	0.980056	0.00667794	0	0	0	0	0	0	0	0	0	0	0.008049	0.000334669	0	0	0	0	0
Y22D7AL.16	0.000186758	0	0	0	0	0	0.000527445	0	0.885207	0	0	0.00327056	0	0	0.026765	0.0716553	0	0	0	0	0.00181698	0	0.00310618	0	0	0	0.00746488
nhr-277	0.00104963	0	0	0	0	0.00181626	0	0	0.81329	0.146546	0	0.0210802	0	0	0	0.00299902	0	0	0	0	0.000528164	0.000170785	0	0.0113261	0	0	0.00119338

## Sheet: F1 G+F1FS3 E
Gene	WormBase Gene ID	Category	FKH-8 Peak
aqp-6	WBGene00000174	Subtype-specific	NO
arl-13	WBGene00021349	Core	YES
arl-3	WBGene00000188	Core	YES
arl-6	WBGene00000193	Core	YES
asb-1	WBGene00000206	Male	NO
asg-2	WBGene00000210	Male	YES
asic-1	WBGene00022815	Subtype-specific	NO
asic-2	WBGene00012137	Subtype-specific	NO
atp-2	WBGene00000229	Male	YES
bbs-1	WBGene00000241	Core	YES
bbs-2	WBGene00000242	Core	NO
bbs-4	WBGene00043992	Core	YES
bbs-5	WBGene00010974	Core	YES
bbs-8	WBGene00000244	Core	YES
bbs-9	WBGene00016744	Core	NO
ccep-290	WBGene00021643	Core	YES
cdkl-1	WBGene00012779	Broad Expression	NO
cfap-36	WBGene00022435	Core	YES
che-10	WBGene00018051	Core	NO
che-11	WBGene00000490	Core	NO
che-12	WBGene00000491	Core	YES
che-13	WBGene00000492	Core	YES
che-2	WBGene00000484	Core	YES
che-3	WBGene00000485	Core	YES
cil-1	WBGene00086546	Male	NO
cil-7	WBGene00021017	Male	NO
clhm-1	WBGene00016626	Subtype-specific	NO
clic-1	WBGene00020246	Core	YES
cng-3	WBGene00000563	Subtype-specific	YES
cwp-5	WBGene00009844	Male	NO
daf-10	WBGene00000906	Core	YES
daf-11	WBGene00000907	Subtype-specific	NO
daf-25	WBGene00000917	Broad Expression	NO
daf-37	WBGene00016246	Subtype-specific	NO
dcar-1	WBGene00007395	Subtype-specific	NO
dli-1	WBGene00001007	Core	YES
dyci-1	WBGene00015927	Core	YES
dyf-1	WBGene00001117	Core	NO
dyf-11	WBGene00001127	Core	YES
dyf-13	WBGene00001129	Core	NO
dyf-17	WBGene00012673	Broad Expression	YES
dyf-19	WBGene00012826	Core	YES
dyf-2	WBGene00001118	Core	YES
dyf-3	WBGene00001119	Core	YES
dyf-5	WBGene00001121	Core	NO
dyf-6	WBGene00001122	Core	YES
dyf-7	WBGene00001123	Core	NO
dylt-2	WBGene00017014	Core	YES
flp-17	WBGene00001460	Broad Expression	NO
gar-2	WBGene00001518	Subtype-specific	NO
gasr-8	WBGene00008144	Broad Expression	YES
gcy-1	WBGene00001528	Subtype-specific	NO
gcy-12	WBGene00001538	Subtype-specific	NO
gcy-14	WBGene00001540	Subtype-specific	NO
gcy-15	WBGene00001541	Subtype-specific	NO
gcy-18	WBGene00001543	Subtype-specific	NO
gcy-19	WBGene00001544	Subtype-specific	NO
gcy-2	WBGene00001529	Subtype-specific	NO
gcy-20	WBGene00001545	Subtype-specific	NO
gcy-21	WBGene00001546	Subtype-specific	YES
gcy-22	WBGene00001547	Subtype-specific	NO
gcy-23	WBGene00001548	Subtype-specific	NO
gcy-27	WBGene00001550	Subtype-specific	NO
gcy-29	WBGene00007314	Subtype-specific	NO
gcy-3	WBGene00001530	Subtype-specific	NO
gcy-31	WBGene00001551	Subtype-specific	NO
gcy-33	WBGene00001553	Subtype-specific	YES
gcy-4	WBGene00001531	Subtype-specific	YES
gcy-5	WBGene00001532	Subtype-specific	NO
gcy-6	WBGene00001533	Subtype-specific	NO
gcy-7	WBGene00001534	Subtype-specific	NO
gcy-8	WBGene00001535	Subtype-specific	NO
gcy-9	WBGene00001536	Subtype-specific	NO
gpa-13	WBGene00001675	Subtype-specific	NO
gpa-3	WBGene00001665	Subtype-specific	YES
hyls-1	WBGene00015466	Core	YES
ift-139	WBGene00022696	Core	NO
ift-20	WBGene00022465	Core	YES
ift-74	WBGene00016005	Core	YES
ift-81	WBGene00017973	Core	YES
ifta-1	WBGene00016935	Core	YES
ifta-2	WBGene00012132	Core	YES
jbts-14	WBGene00018727	Core	NO
K07C11.10	WBGene00019482	Broad Expression	YES
kap-1	WBGene00002182	Core	YES
kin-10	WBGene00002196	Male	YES
klp-11	WBGene00002222	Core	YES
klp-20	WBGene00002230	Core	YES
klp-6	WBGene00002218	Male	YES
lov-1	WBGene00003058	Male	NO
mks-1	WBGene00020100	Core	NO
mks-2	WBGene00194710	Core	NO
mks-3	WBGene00018042	Core	YES
mks-5	WBGene00007490	Core	YES
mks-6	WBGene00010642	Core	YES
mksr-1	WBGene00019364	Core	NO
mksr-2	WBGene00021416	Core	NO
nphp-1	WBGene00010898	Core	YES
nphp-2	WBGene00021304	Core	YES
nphp-4	WBGene00011261	Core	NO
nsy-4	WBGene00021415	Subtype-specific	NO
nubp-1	WBGene00008664	Core	YES
nud-1	WBGene00003829	Broad Expression	NO
ocr-1	WBGene00003838	Subtype-specific	YES
ocr-2	WBGene00003839	Subtype-specific	NO
ocr-4	WBGene00003841	Subtype-specific	NO
odr-1	WBGene00003848	Subtype-specific	NO
odr-10	WBGene00003856	Subtype-specific	YES
odr-3	WBGene00003850	Subtype-specific	YES
odr-4	WBGene00003851	Subtype-specific	YES
odr-8	WBGene00018160	Subtype-specific	YES
osm-1	WBGene00003883	Core	YES
osm-12	WBGene00003892	Core	YES
osm-3	WBGene00003884	Core	YES
osm-5	WBGene00003885	Core	YES
osm-6	WBGene00003886	Core	YES
osm-9	WBGene00003889	Subtype-specific	YES
osta-1	WBGene00015287	Core	YES
pef-1	WBGene00003969	Subtype-specific	NO
peli-1	WBGene00017766	Core	YES
pitp-1	WBGene00010813	Subtype-specific	NO
pkd-2	WBGene00004035	Subtype-specific	NO
rab-8	WBGene00004272	Core	YES
rbg-3	WBGene00007167	Core	YES
rpi-2	WBGene00019536	Core	YES
srab-16	WBGene00020060	Subtype-specific	NO
srbc-64	WBGene00021477	Subtype-specific	NO
srbc-66	WBGene00020746	Subtype-specific	YES
srd-23	WBGene00005101	Subtype-specific	NO
srg-2	WBGene00005160	Subtype-specific	NO
srg-36	WBGene00005193	Subtype-specific	NO
srg-37	WBGene00005194	Subtype-specific	NO
srsx-3	WBGene00022408	Subtype-specific	NO
sru-38	WBGene00005701	Subtype-specific	NO
str-1	WBGene00006069	Subtype-specific	NO
str-112	WBGene00006163	Subtype-specific	NO
str-113	WBGene00006164	Subtype-specific	NO
str-163	WBGene00006208	Subtype-specific	YES
str-2	WBGene00006070	Subtype-specific	NO
str-44	WBGene00006109	Subtype-specific	NO
sulp-2	WBGene00017464	Subtype-specific	NO
tax-2	WBGene00006525	Subtype-specific	NO
tax-4	WBGene00006526	Subtype-specific	YES
tax-6	WBGene00006527	Broad Expression	YES
tba-5	WBGene00006531	Core	NO
tba-6	WBGene00006532	Core	NO
tbb-4	WBGene00006538	Core	YES
tmc-1	WBGene00020490	Subtype-specific	NO
tmem-107	WBGene00043308	Core	YES
tmem-138	WBGene00008643	Core	YES
tmem-17	WBGene00022733	Core	YES
tmem-218	WBGene00044771	Core	YES
tmem-231	WBGene00020825	Core	NO
tram-1	WBGene00007696	Subtype-specific	YES
trp-4	WBGene00006616	Subtype-specific	NO
trpa-1	WBGene00007801	Subtype-specific	NO
tub-1	WBGene00006655	Core	YES
xbx-1	WBGene00006960	Core	YES
xbx-3	WBGene00010864	Broad Expression	YES
xbx-4	WBGene00016025	Broad Expression	NO
xbx-5	WBGene00011974	Broad Expression	YES
xbx-6	WBGene00009580	Broad Expression	NO
xbx-9	WBGene00007604	Broad Expression	NO

## Sheet: F1 G
Gene	Stage	ENCODE ID	# peaks	Ciliome Targets			Correlation Peaks/Targets
elt-2	L3	ENCFF417YEF	9198	26		Pearson	0.690505
daf-16	L4	ENCFF387SWS	8777	41		R^2	0.476797
blmp-1	L1	ENCFF786OZI	8751	16		t	20.1151
nhr-28	L4	ENCFF049VYW	8745	0		N	446
nhr-71	L1	ENCFF880YTO	8540	44		p-value	1.61477e-64
pha-4	L3	ENCFF731VKY	7847	16
fos-1	L2	ENCFF401LJF	7446	19
dve-1	L4	ENCFF560YTQ	7262	29
hlh-30	L4	ENCFF793PTZ	7168	29
sma-9	L2	ENCFF220NCO	7065	28
nhr-80	YA	ENCFF956VXA	7038	37
nfya-1	L3	ENCFF797WBT	6932	40
lsy-2	S1	ENCFF693SQO	6850	8
lin-35	L1	ENCFF638REK	6712	40
snu-23	L1	ENCFF468IRP	6675	34
nhr-129	L2	ENCFF266DSF	6626	38
nhr-20	L1	ENCFF390OCN	6423	33
lsy-2	L2	ENCFF685EPU	6312	31
ces-1	LE	ENCFF884HVS	6290	1
dsc-1	L1	ENCFF628DQW	6283	52
unc-55	L2	ENCFF126HEZ	5993	35
cebp-1	YA	ENCFF828QGA	5982	28
lsy-2	L4	ENCFF637JNX	5944	25
C27D6.4	L2	ENCFF402SFY	5735	33
C34F6.9	L2	ENCFF747FCY	5692	44
rnt-1	L1	ENCFF650RDJ	5560	34
pqm-1	L3	ENCFF274XKV	5560	23
mes-2	L4	ENCFF587ZXU	5501	35
elt-2	L1	ENCFF848ZRN	5443	44
nhr-47	L1	ENCFF043OZU	5357	37
mep-1	L4	ENCFF252LNY	5229	27
F13H6.1	L2	ENCFF501VXJ	5133	27
nhr-25	L3	ENCFF452LBG	5017	15
fkh-8	L1	ENCFF616NLH	4963	80
nhr-23	L3	ENCFF258ZOU	4944	2
mep-1	L1	ENCFF959JUU	4904	28
efl-1	L1	ENCFF252QCK	4835	39
unc-42	LE	ENCFF234BZN	4780	31
pqm-1	L4	ENCFF477CCV	4739	7
snpc-4	YA	ENCFF828RJF	4675	19
nhr-25	L2	ENCFF751QFU	4548	30
efl-1	L1	ENCFF937MBW	4534	36
elt-3	L1	ENCFF340TJO	4530	18
dpl-1	L1	ENCFF516SDI	4441	37
tbx-2	L1	ENCFF043LSW	4384	22
mdl-1	L4	ENCFF208CFV	4293	3
lin-39	L3	ENCFF311XNV	4250	1
lsy-2	L1	ENCFF922ZHJ	4218	39
sma-3	L2	ENCFF964QGY	4205	23
nhr-90	L1	ENCFF749BVA	4133	26
nfya-1	LE	ENCFF121FYT	4098	31
elt-2	LE	ENCFF366BQY	4098	22
swsn-7	L1	ENCFF211HGH	4087	29
hmg-11	L3	ENCFF755YIW	4037	35
F45C12.2	L1	ENCFF660HLW	3913	29
C01B12.2	L2	ENCFF026EAT	3909	31
lsl-1	YA	ENCFF435YQE	3897	31
nhr-43	L3	ENCFF782DMI	3889	19
mdl-1	L1	ENCFF732RXQ	3870	25
tbp-1	YA	ENCFF583BSL	3862	27
lin-35	L1	ENCFF580JUJ	3838	35
efl-1	L1	ENCFF537HHB	3824	34
dpl-1	L1	ENCFF128KWB	3726	32
ceh-31	LE	ENCFF382SPH	3697	22
nhr-21	L2	ENCFF810VDS	3647	20
xbp-1	L1	ENCFF661GOR	3641	30
ceh-38	L3	ENCFF613YIQ	3531	20
hif-1	L4	ENCFF343GOY	3531	20
skn-1	L1	ENCFF297MOU	3484	30
nhr-77	L4	ENCFF029DND	3457	6
lin-54	YA	ENCFF637BGL	3449	24
rbr-2	L4	ENCFF652JWM	3442	24
dpl-1	L4	ENCFF035TBW	3369	28
nhr-48	L4	ENCFF070EOV	3361	18
nhr-85	L1	ENCFF017FSZ	3332	19
attf-5	YA	ENCFF613ELZ	3331	29
lin-15b	L3	ENCFF853HTE	3331	29
dpl-1	YA	ENCFF473RUF	3295	27
hlh-1	EM	ENCFF048VMZ	3254	24
C16A3.4	L1	ENCFF979NKY	3220	26
lin-40	YA	ENCFF274MSU	3066	17
blmp-1	L2	ENCFF591JQI	3060	3
tbx-2	LE	ENCFF803YCJ	3053	16
ama-1	L3	ENCFF686EOM	3052	10
lin-13	L2	ENCFF843BIK	3040	19
unc-86	L1	ENCFF142MID	2987	20
unc-120	EM	ENCFF364HLT	2951	19
snpc-4	YA	ENCFF419FIG	2950	17
elt-3	L1	ENCFF242CDF	2940	9
efl-1	YA	ENCFF837QON	2825	23
dpl-1	L1	ENCFF464VMO	2797	30
nhr-102	L4	ENCFF380HYG	2796	18
unc-62	L4	ENCFF466UTQ	2761	0
unc-62	EM	ENCFF539DAP	2754	14
jun-1	L3	ENCFF773GAZ	2738	15
nhr-6	L4	ENCFF712FJS	2720	13
nhr-11	L4	ENCFF099REA	2719	4
lin-35	YA	ENCFF607ITW	2712	9
snpc-4	L3	ENCFF298XXN	2672	22
F23F12.9	EM	ENCFF961PGL	2634	8
unc-130	L1	ENCFF209GZO	2631	17
fkh-10	L1	ENCFF878LWY	2602	18
ceh-18	LE	ENCFF955WSB	2575	19
egl-5	L3	ENCFF159DZP	2570	18
lsy-2	EM	ENCFF321IGV	2568	42
daf-16	L4	ENCFF127ZUQ	2563	14
unc-55	LE	ENCFF647WWB	2511	12
ceh-34	LE	ENCFF205CKB	2508	15
efl-1	YA	ENCFF882KRZ	2498	21
sem-4	L2	ENCFF990DNE	2490	19
ztf-18	YA	ENCFF983GOH	2465	20
irx-1	L1	ENCFF521VSC	2445	20
sptf-1	EM	ENCFF512HLK	2430	18
W03F9.2	L4-YA	ENCFF021RRV	2409	25
mep-1	EM	ENCFF913QKQ	2404	33
let-607	YA	ENCFF537LBS	2372	19
snpc-4	L1	ENCFF337AWZ	2347	24
F45C12.2	L1	ENCFF722TTG	2346	19
snpc-4	YA	ENCFF056ZMO	2345	15
lin-13	L1	ENCFF077LFH	2333	19
jun-1	L1	ENCFF865TNA	2305	18
egl-13	L1	ENCFF246YGZ	2294	22
nhr-77	L1	ENCFF827SQC	2285	23
K12H6.12	YA	ENCFF458CVD	2268	17
fkh-10	L4	ENCFF456ECS	2253	10
atf-7	YA	ENCFF357FWV	2247	14
efl-1	YA	ENCFF329MXB	2207	19
mab-5	L2	ENCFF290VUG	2197	4
F16B12.6	L1	ENCFF246JCO	2183	21
lsy-2	L2	ENCFF426GGL	2182	31
pha-4	EM	ENCFF674WWP	2177	38
lin-13	L4	ENCFF231FQX	2141	18
pax-3	L1	ENCFF603FNA	2139	19
ref-2	LE	ENCFF628QRC	2129	14
rpc-1	YA	ENCFF924VCM	2123	13
mdl-1	L2	ENCFF327XPQ	2103	13
T02C12.2	YA	ENCFF393FDA	2101	23
lsy-12	L3	ENCFF487QNZ	2095	15
ama-1	L4	ENCFF957FYC	2082	9
ZK185.1	YA	ENCFF973ASG	2053	16
F45C12.2	L1	ENCFF411HCZ	2052	17
him-1	YA	ENCFF276GFG	2051	14
fkh-10	L3	ENCFF081QIY	2005	14
egl-27	L2	ENCFF633TFI	1997	8
duxl-1	L4	ENCFF691FDK	1980	16
hlh-30	LE	ENCFF574KYZ	1959	10
rnt-1	LE	ENCFF748YTM	1931	13
ztf-26	YA	ENCFF562IEL	1929	13
mls-2	EM	ENCFF207WMK	1925	11
lin-11	L2	ENCFF907TGT	1917	24
rpc-1	YA	ENCFF153EGH	1914	13
lir-3	L1	ENCFF609FTU	1910	15
elt-1	L3	ENCFF597ZON	1910	1
ztf-4	L1	ENCFF200KXD	1898	17
fos-1	L1	ENCFF197AZT	1895	37
chd-7	YA	ENCFF230JYB	1884	12
ztf-11	L1	ENCFF025YZI	1875	5
madf-10	YA	ENCFF592CXC	1869	14
snpc-4	L2	ENCFF693QRB	1864	22
ama-1	L2	ENCFF652LAC	1861	16
nhr-2	LE	ENCFF481WTM	1861	7
F13C5.2	EE	ENCFF806KUW	1850	18
cog-1	EM	ENCFF853HAG	1841	17
xnd-1	YA	ENCFF399ZQK	1841	15
ceh-48	LE	ENCFF049GIN	1840	18
nhr-25	L4	ENCFF554GMC	1826	11
zag-1	L2	ENCFF018CUC	1803	4
him-1	L4-YA	ENCFF238YJK	1797	16
ztf-4	L2	ENCFF447UNX	1794	11
repo-1	YA	ENCFF133DVJ	1789	12
snpc-4	YA	ENCFF518UAB	1781	3
skn-1	L3	ENCFF638SME	1778	7
ceh-38	L4	ENCFF846RJO	1739	5
F23B12.7	YA	ENCFF574JUC	1707	21
spr-1	L4	ENCFF831OBX	1686	11
ceh-14	LE	ENCFF300DGX	1681	14
F08F3.9	YA	ENCFF036KKS	1676	20
unc-130	L4	ENCFF580NRF	1667	14
nhr-6	L2	ENCFF580XNH	1662	23
ceh-36	EE	ENCFF700VHG	1662	7
athp-1	YA	ENCFF189IRK	1649	10
snpc-4	YA	ENCFF801FPR	1648	2
tbx-2	L3	ENCFF364YSF	1631	22
nhr-237	EM	ENCFF372CBZ	1626	20
F49E8.2	YA	ENCFF828QIC	1607	13
Y55F3AM.14	L2	ENCFF344AZF	1604	13
R02D3.7	L3	ENCFF427EMS	1584	7
F37D6.2	L4	ENCFF168NLK	1574	13
lsy-2	L4	ENCFF844URN	1563	24
B0261.1	YA	ENCFF679PAW	1550	13
dpl-1	YA	ENCFF986NPW	1546	17
lin-13	EM	ENCFF271GCS	1534	26
C06A8.2	YA	ENCFF429FTR	1500	13
sox-4	L1	ENCFF847TMB	1497	13
daf-16	L4	ENCFF497YXN	1489	12
lin-39	L1	ENCFF849URN	1488	27
let-607	YA	ENCFF102FGR	1488	12
pha-4	L4	ENCFF680ECP	1484	10
ceh-2	LE	ENCFF677ULZ	1453	10
dve-1	LE	ENCFF638DTC	1447	9
aly-2	L1	ENCFF189QCT	1446	17
M03D4.4	EM	ENCFF502OIZ	1443	11
nhr-90	YA	ENCFF025ABT	1441	10
die-1	YA	ENCFF767SMF	1432	11
C08G9.2	LE	ENCFF342HPK	1416	8
elt-1	EM	ENCFF260KEH	1400	8
ceh-16	L2	ENCFF348VYV	1358	11
sdc-2	LE	ENCFF097ZZN	1344	8
wago-9	YA	ENCFF020YZX	1341	8
F49E8.2	L4	ENCFF598TBB	1339	17
ama-1	L1	ENCFF651FSZ	1328	18
rpc-1	YA	ENCFF178JLJ	1320	12
ztf-7	L4	ENCFF644ZIM	1311	9
zip-4	L1	ENCFF119JAS	1290	15
elt-3	L1	ENCFF462ZST	1262	8
ceh-83	EE	ENCFF086EBK	1258	9
ceh-39	LE	ENCFF078GAL	1244	14
C04F5.9	L1	ENCFF570ZVK	1205	11
elt-3	L1	ENCFF535LLO	1202	6
fkh-4	L1	ENCFF383EHQ	1189	10
unc-130	YA	ENCFF172VQX	1168	14
nhr-11	L1	ENCFF936DOH	1141	18
hlh-8	LE	ENCFF727YTH	1120	6
mdl-1	L4	ENCFF116PDD	1115	0
ceh-19	LE	ENCFF069CFJ	1112	7
ets-4	LE	ENCFF170GHK	1106	8
ama-1	YA	ENCFF543IMF	1103	5
mdl-1	L2	ENCFF922CAY	1076	7
F13H6.1	LE	ENCFF896SUX	1065	5
gei-8	L4	ENCFF397OVB	1053	10
elt-3	L3	ENCFF595WQO	1047	1
unc-62	L3	ENCFF337WGN	1037	2
ces-1	L4	ENCFF373KPG	1033	7
F52B5.7	YA	ENCFF484LAP	1032	9
nhr-11	L3	ENCFF027ZMR	1030	9
gei-17	YA	ENCFF401RGK	1030	8
mdl-1	L3	ENCFF502QAI	1015	4
elt-3	L1	ENCFF336FMR	1014	6
ceh-43	EM	ENCFF215LTP	998	6
nhr-10	L4	ENCFF742NNB	994	3
vab-15	L1	ENCFF085CJT	990	7
nhr-237	L1	ENCFF479TYB	970	9
ztf-22	YA	ENCFF347BNH	952	8
spr-3	L4	ENCFF899WNY	945	10
syd-9	LE	ENCFF388LHV	941	9
sup-37	L1	ENCFF030ZWT	924	9
hlh-6	LE	ENCFF621NJR	912	5
pag-3	L1	ENCFF530UXB	910	3
zim-3	YA	ENCFF854BDB	906	8
jun-1	L4	ENCFF830YNE	899	3
ama-1	YA	ENCFF752TYU	887	5
aly-1	EE	ENCFF463ILT	881	10
pha-2	LE	ENCFF513HQI	878	5
skn-1	L2	ENCFF102UPA	872	16
F10B5.3	L4	ENCFF752USX	862	8
lin-35	L1	ENCFF184ZNO	857	24
zip-2	L4	ENCFF466FDJ	855	5
blmp-1	EM	ENCFF512HRM	843	35
unc-62	DA	ENCFF355XNZ	843	17
pha-4	YA	ENCFF965ETB	839	0
mef-2	L1	ENCFF528NMF	832	6
fax-1	LE	ENCFF122ING	830	8
ztf-16	LE	ENCFF558SNT	822	10
unc-86	LE	ENCFF245CGI	816	7
egl-27	L3	ENCFF707ZQU	814	3
F22D6.2	YA	ENCFF272QOF	798	5
che-1	LE	ENCFF193KPC	791	8
elt-3	L3	ENCFF478WDG	774	1
madf-2	LE	ENCFF233NCL	772	5
fkh-6	LE	ENCFF416CLW	767	6
ceh-90	L1	ENCFF680GIY	765	4
unc-3	LE	ENCFF562MZK	754	7
B0035.1	YA	ENCFF127JUG	750	6
F45C12.2	L3	ENCFF094IUX	748	7
zip-5	LE	ENCFF846ZIE	746	6
rec-8	YA	ENCFF104SNN	739	9
ceh-26	LE	ENCFF250OYG	737	2
pat-9	LE	ENCFF876IEX	735	6
ama-1	YA	ENCFF421MQK	732	5
ama-1	EE	ENCFF565GPX	724	18
ztf-11	EM	ENCFF998SQM	721	15
pax-1	LE	ENCFF605FZD	714	5
egl-27	L1	ENCFF180KPQ	705	17
ztf-4	L3	ENCFF638GRZ	704	6
ttx-3	LE	ENCFF084PPY	700	6
tbx-7	LE	ENCFF979XFH	690	5
K09A11.1	LE	ENCFF150XTT	689	6
pqm-1	L1	ENCFF944XEI	682	26
pqm-1	LE	ENCFF925UHV	669	4
sox-4	LE	ENCFF355UFD	668	6
sdz-12	L4	ENCFF710ANE	665	8
zfp-2	L4	ENCFF263CGA	660	11
dmd-4	LE	ENCFF779JJA	652	0
C38D4.7	LE	ENCFF217RHN	649	8
B0310.2	EE	ENCFF387YZX	642	6
elt-3	EM	ENCFF718MJC	637	27
T23F11.4	LE	ENCFF704CKL	636	8
Y5F2A.4	L4	ENCFF427PIR	635	8
gmeb-2	LE	ENCFF203ETP	634	8
sem-2	EE	ENCFF211STS	634	7
hif-1	L4	ENCFF484RKD	631	7
T07F8.4	YA	ENCFF514NZP	621	8
cey-2	L4	ENCFF134DVW	611	1
rec-8	YA	ENCFF317BVD	606	8
ets-7	EE	ENCFF774PQC	595	9
nhr-77	L3	ENCFF864BCW	590	6
bed-3	EM	ENCFF539TJA	589	6
F10E7.11	YA	ENCFF209MKK	575	8
lim-6	LE	ENCFF230NCA	570	5
ceh-79	YA	ENCFF653SPX	566	8
hnd-1	EE	ENCFF033IGC	562	6
fos-1	L3	ENCFF818XUP	561	5
lin-11	LE	ENCFF333RSN	560	4
mxl-1	YA	ENCFF231JMG	557	8
lir-3	L4	ENCFF471JRR	552	6
lin-35	YA	ENCFF671GPT	550	3
dao-5	L4-YA	ENCFF174KAZ	549	7
hlh-4	L1	ENCFF675FGE	545	5
ceh-30	LE	ENCFF710LPF	545	4
R02D3.7	L2	ENCFF263OZA	542	12
F45C12.2	L2	ENCFF422QGX	537	7
ztf-3	YA	ENCFF523EZQ	534	5
aha-1	L1	ENCFF520ZWF	530	5
aha-1	L4	ENCFF394KJI	530	4
tbx-8	EE	ENCFF109JMS	521	7
Y53C12C.1	EM	ENCFF596OTE	519	6
nhr-232	LE	ENCFF030XGN	519	4
mab-5	EM	ENCFF200ZFM	502	14
nhr-111	L4	ENCFF585SQX	501	6
K02D7.2	LE	ENCFF956GSL	495	7
nhr-10	L2	ENCFF070JRD	491	8
ZK546.5	L2	ENCFF934TCG	491	7
ahr-1	LE	ENCFF840RGJ	479	5
zag-1	L1	ENCFF885AZL	478	13
ama-1	LE	ENCFF328PUF	476	6
Y22D7AL.16	LE	ENCFF916OOQ	469	6
mes-4	YA	ENCFF529JCY	460	9
med-1	EM	ENCFF758SFL	460	5
mec-3	LE	ENCFF674SBC	457	4
fkh-3	YA	ENCFF071WAU	441	10
hmbx-1	EE	ENCFF095FZG	437	5
pop-1	EE	ENCFF680REC	434	6
dpff-1	YA	ENCFF882DDY	422	6
nhr-77	L2	ENCFF136ZPY	415	17
unc-62	L2	ENCFF050TCQ	414	3
ceh-32	L4	ENCFF321RPE	412	4
hlh-15	LE	ENCFF830UYQ	407	6
lin-35	YA	ENCFF229LET	396	2
tra-4	EE	ENCFF502EIC	394	6
nhr-270	YA	ENCFF870MDZ	393	6
R02D3.7	L4	ENCFF996UBP	390	5
mel-28	YA	ENCFF618YBL	389	4
lin-15b	L4	ENCFF481VPP	383	5
snpc-4	L4	ENCFF724LLT	381	20
fkh-10	LE	ENCFF495XKO	378	1
ces-1	L1	ENCFF245OYD	371	32
flh-1	EE	ENCFF965EFQ	371	3
T26A5.8	YA	ENCFF124WEV	369	6
aly-2	L3	ENCFF768JMX	368	2
nhr-76	L3	ENCFF234AFQ	361	2
F57C9.4	YA	ENCFF660KSH	360	6
zag-1	L3	ENCFF400BYE	357	3
npax-4	LE	ENCFF664PLJ	354	6
elt-1	L2	ENCFF406SQS	351	8
nhr-237	L2	ENCFF335JJJ	350	2
lsy-27	YA	ENCFF240YLT	342	6
elt-4	LE	ENCFF678NPA	342	3
tlp-1	L1	ENCFF779VNL	328	2
pag-3	LE	ENCFF708SPD	327	1
nhr-76	L4	ENCFF440DJA	319	0
sea-2	L3	ENCFF150PHU	312	2
lin-39	L2	ENCFF056MQK	311	12
ZK546.5	L4	ENCFF575UYR	304	3
eor-1	L3	ENCFF499XNC	285	3
ceh-22	LE	ENCFF797ZTL	285	1
nhr-11	L2	ENCFF227XEO	280	13
elt-3	L3	ENCFF111WUS	280	0
ceh-24	LE	ENCFF927DCV	276	4
C34B4.2	L1	ENCFF380DKM	267	3
unc-39	EM	ENCFF314MSH	267	2
ZK546.5	L3	ENCFF187HCN	261	4
odd-2	LE	ENCFF672YEY	260	1
mdl-1	L1	ENCFF900FDN	259	21
nhr-179	YA	ENCFF053JYI	256	3
elt-3	L1	ENCFF918WLD	253	3
nhr-12	EM	ENCFF503DYQ	249	4
nhr-76	L1	ENCFF634NVZ	248	2
fos-1	L4	ENCFF847FUB	248	1
zag-1	L4	ENCFF227VXQ	246	1
hlh-12	YA	ENCFF650HPJ	245	5
nhr-28	EM	ENCFF072YUI	238	37
nhr-237	L4	ENCFF187UKU	237	0
nhr-12	L2	ENCFF641DFP	228	0
ceh-16	L3	ENCFF572NNI	214	1
snpc-4	EM	ENCFF563NSB	213	29
dmd-4	L2	ENCFF589UZZ	212	4
ztf-11	L2	ENCFF122IAD	210	0
ceh-9	LE	ENCFF183VFL	207	0
fkh-2	L3	ENCFF447GPP	203	0
Y116A8C.19	L1	ENCFF280FDS	198	2
unc-62	L4	ENCFF012ZWA	197	0
mml-1	L3	ENCFF553DXA	195	0
aly-2	L4	ENCFF818YOR	193	0
C05D10.1	L4	ENCFF549ZSK	173	1
tbx-9	YA	ENCFF694MNH	169	1
nhr-12	L1	ENCFF552OQU	164	2
lin-39	L4	ENCFF357NSB	163	0
nhr-28	L3	ENCFF496CFD	162	1
peb-1	L2	ENCFF092YIJ	160	1
nhr-28	L1	ENCFF799WBN	159	1
daf-12	L3	ENCFF810HSZ	150	0
nhr-76	EM	ENCFF554KQD	140	2
unc-39	L2	ENCFF390OSN	140	1
nhr-67	L3	ENCFF433BEM	137	0
mbf-1	L2	ENCFF960EQR	132	0
sma-9	L2	ENCFF792JXA	125	0
unc-30	L1	ENCFF761XWC	125	0
unc-62	L1	ENCFF384GUN	119	3
unc-62	L4	ENCFF803WZH	114	0
unc-39	L3	ENCFF448URK	110	1
nhr-84	L1	ENCFF827XAE	106	2
nhr-23	L2	ENCFF595SML	105	25
alr-1	L2	ENCFF803QRP	103	0
egl-27	L4	ENCFF587FBJ	102	2
sdz-38	YA	ENCFF789TVB	102	1
nhr-11	LE	ENCFF816EMR	101	0
nfya-1	YA	ENCFF554VDX	97	0
skn-1	L4	ENCFF241SCQ	97	0
ztf-11	L3	ENCFF202WJY	96	0
unc-62	L3	ENCFF017FUN	95	1
ZK546.5	L4	ENCFF798RPP	92	2
ztf-11	L1	ENCFF541MIX	88	1
aly-2	L2	ENCFF176UKF	78	5
unc-39	L4	ENCFF947PYR	63	0
F45C12.2	L4	ENCFF786PUW	57	0
nhr-12	L3	ENCFF400VSR	57	0
R06F6.6	L4	ENCFF786PQH	50	0
F55B11.4	YA	ENCFF398DRS	48	2
daf-12	L4	ENCFF868IPD	48	0
nhr-237	L3	ENCFF409ZRG	48	0
ztf-11	L4	ENCFF303QBQ	47	0
ceh-9	L3	ENCFF671UBP	45	3
elt-3	L2	ENCFF273RBS	33	2
eor-1	L3	ENCFF995PYF	33	0
sptf-1	L1	ENCFF897INS	18	0
pha-4	LE	ENCFF489OMV	9	8
			1795.27	12.5717

## Sheet: F1FS3 A
Broad	Male	Core	Subtype-specific		X-box	PRESENT	ABSENT
WBGene00003829	WBGene00002218	WBGene00000188	WBGene00000174		Core	62	11
WBGene00007604	WBGene00003058	WBGene00000241	WBGene00001529		Subtype-specific	25	43
WBGene00008144	WBGene00009844	WBGene00000242	WBGene00001530		Broad Expression	10	3
WBGene00009580	WBGene00021017	WBGene00000244	WBGene00001541		Male	5	4
WBGene00010864	WBGene00086546	WBGene00000484	WBGene00001543			102	61
WBGene00011974		WBGene00000490	WBGene00001547
WBGene00012673		WBGene00000491	WBGene00001550
WBGene00012779		WBGene00000492	WBGene00001551
WBGene00016025		WBGene00000906	WBGene00003838
WBGene00019482		WBGene00001117	WBGene00003841
		WBGene00001118	WBGene00003851
		WBGene00001119	WBGene00003969
		WBGene00001121	WBGene00004035
		WBGene00001122	WBGene00005160
		WBGene00001123	WBGene00006069
		WBGene00001127	WBGene00006109
		WBGene00001129	WBGene00006163
		WBGene00002222	WBGene00006525
		WBGene00003883	WBGene00006616
		WBGene00003884	WBGene00007801
		WBGene00003885	WBGene00012137
		WBGene00003886	WBGene00016626
		WBGene00003892	WBGene00018160
		WBGene00004272	WBGene00020746
		WBGene00006532	WBGene00022408
		WBGene00006538
		WBGene00006655
		WBGene00006960
		WBGene00007167
		WBGene00007490
		WBGene00008643
		WBGene00010642
		WBGene00010974
		WBGene00011261
		WBGene00012826
		WBGene00015287
		WBGene00015466
		WBGene00016005
		WBGene00016744
		WBGene00016935
		WBGene00017014
		WBGene00017766
		WBGene00017973
		WBGene00018042
		WBGene00018051
		WBGene00018727
		WBGene00019364
		WBGene00019536
		WBGene00020100
		WBGene00020825
		WBGene00021304
		WBGene00021349
		WBGene00021416
		WBGene00021643
		WBGene00022435
		WBGene00022465
		WBGene00022696
		WBGene00022733
		WBGene00043308
		WBGene00043992
		WBGene00044771
		WBGene00194710

## Sheet: F1FS3 D
	fkh-8	nhr-277	nhr-158	ceh-57	# neurons	Region
IL2_DV	132.55	4.14	10.814	19.639	4	Labial Region
IL2_LR	114.547	1.668	0.527	4.861	2	Labial Region
IL1	270.246	0	0	0	6	Labial Region
OLL	158.34	0	0	0	2	Labial Region
OLQ	148.079	0	0	0	4	Labial Region
BAG	56.64	129.258	37.978	0	2	Labial Region
CEP	156.676	0	9.793	4.923	4	Labial Region
ASK	69.367	122.457	512.054	310.888	2	Amphid Region
ADL	388.583	268.625	321.014	113.522	2	Amphid Region
ASI	238.294	9.605	411.304	526.418	2	Amphid Region
AWB	72.83	113.484	317.678	108.462	2	Amphid Region
ASG	439.029	1.067	121.863	390.288	2	Amphid Region
AFD	67.095	200.263	152.156	14.79	2	Amphid Region
ADF	170.221	21.701	464.9	231.226	2	Amphid Region
AWA	142.243	443.564	163.849	57.957	2	Amphid Region
ASH	934.505	275.926	717.24	104.758	2	Amphid Region
ASEL	54.838	220.367	180.968	10.978	1	Amphid Region
ASER	205.832	225.362	125.082	4.757	1	Amphid Region
AWC_OFF	141.361	101.74	388.361	21.465	1	Amphid Region
AWC_ON	52.628	100.701	317.959	17.465	1	Amphid Region
ASJ	206.838	68.181	494.346	463.253	2	Amphid Region
FLP	11.9	0	3.866	0	2	Anterior Deirid Region
AQR	91.901	6.995	0.873	0	1	Anterior Deirid Region
ADE	141.991	0	0	0	2	Anterior Deirid Region
PDE	172.064	0	0	2.859	2	Posterior Deirid Region
PHA	78.243	50.274	107.731	118.172	2	Phasmid Region
PHB	93.716	259.222	190.499	56.383	2	Phasmid Region
PQR	146.333	8.982	0	45.802	1	Phasmid Region
					60	ALL ciliated system
