# Supplementary material for: Forkhead transcription factor FKH-8 cooperates with RFX in the direct regulation of sensory cilia in Caenorhabditis elegans
Source: eLife. 2023 Jul 14;12:e89702. doi: 10.7554/eLife.89702 (PMC10393296; doi:10.7554/eLife.89702)
Supplement: Figure 2—source data 1. [file elife-89702-fig2-data1.xlsx]

## Sheet: F2 B
Background	ift-20 Reporter (R)	fkh-8 Reporter (G)	T (ºC)	N	Worm	Stage	Labial Region R	Labial Region G	Labial Region RG	Amphid Region R	Amphid Region G	Amphid Region RG	Anterior Deirid Region R	Anterior Deirid Region G	Anterior Deirid Region RG	Posterior Deirid Region R	Posterior Deirid Region G	Posterior Deirid Region RG	Phasmid Region R	Phasmid Region G	Phasmid Region RG	Neurons R	Neurons G	Neurons RG
wildtype	otIs395	wgIs652	25	8	1	Young Adult	17	15	13	18	24	17	2	2	2	2	4	2	3	5	3	42	50	37
wildtype	otIs395	wgIs652	25	8	2	Young Adult	22	24	21	24	24	24	1	2	1	2	2	1	4	5	4	53	57	51
wildtype	otIs395	wgIs652	25	8	3	Young Adult	22	22	21	24	24	24	0	0	0	1	2	1	4	5	4	51	53	50
wildtype	otIs395	wgIs652	25	8	4	Young Adult	18	20	18	21	22	17	0	0	0	2	2	1	4	5	4	45	49	40
wildtype	otIs395	wgIs652	25	8	5	Young Adult	18	23	17	18	24	17	2	2	2	2	2	1	4	5	4	44	56	41
wildtype	otIs395	wgIs652	25	8	6	Young Adult	18	20	19	21	24	20	1	0	0	2	2	1	5	5	5	47	51	45
wildtype	otIs395	wgIs652	25	8	7	Young Adult	22	22	22	23	23	22	3	1	1	2	2	1	4	5	4	54	53	50
wildtype	otIs395	wgIs652	25	8	8	Young Adult	18	20	17	16	23	15	3	2	2	2	4	2	4	5	4	43	54	40
						MEAN	19.375	20.75	18.5	20.625	23.5	19.5	1.5	1.125	1	1.875	2.5	1.25	4	5	4	47.375	52.875	44.25
						DESVEST	2.19984	2.76457	2.9277	3.02076	0.755929	3.5051	1.19523	0.991031	0.92582	0.353553	0.92582	0.46291	0.534522	0	0.534522	4.68851	2.79987	5.49675
