# Supplementary material for: Forkhead transcription factor FKH-8 cooperates with RFX in the direct regulation of sensory cilia in Caenorhabditis elegans
Source: eLife. 2023 Jul 14;12:e89702. doi: 10.7554/eLife.89702 (PMC10393296; doi:10.7554/eLife.89702)
Supplement: Figure 2—source data 2. [file elife-89702-fig2-data2.xlsx]

## Sheet: F2 C
Term	Overlap	P-value	Adjusted P-value	Z-score	Combined Score	Genes
dauer larval development (GO:0040024)	46/96	6.45861e-10	9.90105e-07	-1.51933	32.1497	dyf-11;unc-119;daf-2;daf-3;daf-18;pdk-1;daf-15;daf-1;daf-38;daf-16;natc-1;natc-2;ttx-3;ins-18;srbc-66;ogt-1;daf-14;daf-11;atp-2;daf-12;lgg-1;ist-1;dao-5;ftt-2;atg-18;daf-8;pptr-1;daf-4;daf-5;daf-28;gpa-3;oga-1;osm-5;che-2;ins-4;ifta-2;ins-3;hsf-1;pkc-1;hlh-13;kin-29;scd-2;osm-3;unc-51;fbxl-1;osm-1
regulation of dauer larval development (GO:0061065)	21/33	5.39339e-08	4.13404e-05	-1.4856	24.8623	daf-2;daf-28;daf-3;daf-18;daf-1;daf-16;ttx-3;ins-1;daf-10;ins-18;daf-14;daf-11;egl-4;daf-12;rund-1;aak-2;daf-8;osm-3;daf-4;daf-5;lin-42
cilium organization (GO:0044782)	26/47	8.59734e-08	4.39324e-05	-1.83702	29.8869	dyf-11;unc-119;daf-10;ift-74;arl-3;bbs-8;daf-11;mks-5;osm-12;klp-20;osm-6;T12B3.1;dyf-6;osm-5;che-2;odr-3;arl-13;ift-20;ifta-1;dyf-3;dyf-2;ift-81;famh-161;che-10;osm-3;osm-1
cilium assembly (GO:0060271)	30/63	7.03631e-07	0.000269666	-1.19458	16.9236	dyf-11;unc-119;mks-3;daf-10;rab-28;mks-6;arl-3;bbs-8;daf-11;mks-5;tmem-218;osm-12;klp-20;osm-6;T12B3.1;dyf-6;osm-5;che-2;odr-3;arl-13;ifta-1;dyf-3;dyf-2;dyf-19;che-12;xbx-1;che-10;osm-3;nphp-1;osm-1
non-motile cilium assembly (GO:1905515)	20/37	4.33693e-06	0.0013297	-2.37337	29.3072	osm-6;dyf-11;dyf-6;osm-5;mks-3;daf-10;arl-13;mks-6;bbs-8;ifta-1;mks-5;dyf-2;tmem-218;osm-12;dyf-19;che-12;xbx-1;osm-3;nphp-1;osm-1
protein complex localization (GO:0031503)	13/19	6.18763e-06	0.00137542	-1.98546	23.8115	osm-6;dyf-11;dyf-6;arl-13;ift-20;ift-74;bbs-8;ifta-1;dyf-2;ift-81;npp-18;osm-12;osm-3
phosphorylation (GO:0016310)	43/113	6.28045e-06	0.00137542	-1.1229	13.4502	pdk-1;ckk-1;tlk-1;rsks-1;cmk-1;cdk-12;R08D7.7;sax-1;cdk-11.2;egl-4;F49C5.4;mak-1;dkf-2;gakh-1;lit-1;F26D11.1;pct-1;dgk-1;par-1;unc-43;kin-1;mlk-1;max-2;akt-2;akt-1;chk-1;jkk-1;pig-1;cdk-5;pkc-1;aak-2;cdk-9;kin-29;mbk-2;cdk-7;sad-1;mpk-1;F07A11.5;F28C10.3;Y67D8A.2;ire-1;unc-51;C14B9.8
organelle assembly (GO:0070925)	40/105	1.26309e-05	0.00242039	-1.67216	18.8609	unc-119;epg-8;epg-7;epg-6;atx-2;daf-10;epg-9;atg-9;arl-3;bbs-8;daf-11;mks-5;lgg-1;hcp-3;lgg-2;osm-12;atg-18;lis-1;knl-1;pptr-2;pptr-1;klp-20;osm-6;unc-108;T12B3.1;osm-5;che-2;odr-3;arl-13;ekl-1;ubxn-2;gcn-2;dyf-3;dyf-2;ral-1;atg-16.1;che-10;osm-3;unc-51;osm-1
protein transport along microtubule (GO:0098840)	12/18	2.14673e-05	0.0036566	-2.03499	21.8741	osm-6;ift-81;dyf-11;dyf-6;osm-12;arl-13;ift-20;ift-74;osm-3;bbs-8;ifta-1;dyf-2
intraciliary transport (GO:0042073)	14/24	3.91349e-05	0.00599938	-1.90731	19.3564	osm-6;dyf-11;dyf-6;daf-10;arl-13;ift-20;ift-74;bbs-8;ifta-1;dyf-2;ift-81;osm-12;xbx-1;osm-3
plasma membrane bounded cell projection assembly (GO:0120031)	20/43	7.56879e-05	0.0105481	-1.85669	17.6179	klp-20;osm-6;unc-119;T12B3.1;osm-5;unc-115;che-2;odr-3;daf-10;arl-13;arl-3;bbs-8;daf-11;dyf-3;mks-5;dyf-2;osm-12;che-10;osm-3;osm-1
regulation of defecation (GO:2000292)	11/18	0.000153108	0.0189558	-2.12416	18.6594	rund-1;ric-7;egl-21;egl-30;gsa-1;aex-6;aex-3;dgk-1;aex-4;nlp-40;aex-2
positive regulation of dauer larval development (GO:0061066)	9/13	0.000160747	0.0189558	-2.59789	22.6943	daf-3;daf-18;daf-16;aak-2;ttx-3;daf-10;osm-3;daf-5;daf-12
proteasomal protein catabolic process (GO:0010498)	25/62	0.00018131	0.0198535	-1.52835	13.1672	ubc-3;ncl-1;cul-4;spsb-1;wdr-23;ubc-21;pas-5;siah-1;mel-26;bath-44;Y92H12A.2;bath-43;rpn-5;hecw-1;ubxn-2;rpn-2;pbs-7;rpn-11;ufd-3;rpn-12;lin-41;pbs-1;pbs-2;ubc-7;pbs-3
regulation of axon extension involved in regeneration (GO:0048690)	8/11	0.000228587	0.0233616	-2.69122	22.5621	mak-2;mlk-1;dlk-1;efa-6;mkk-4;cebp-1;pmk-3;vhp-1
regulation of developmental growth (GO:0048638)	25/63	0.000244192	0.0233967	-1.09735	9.12726	unc-76;pdk-1;swan-1;tax-4;daf-16;mkk-4;ttx-3;daf-11;egl-4;pde-2;sax-7;daf-28;unc-69;lin-59;che-2;akt-2;akt-1;tin-9.1;ins-4;kin-29;sad-1;bir-1;let-607;dpy-30;unc-51
receptor-mediated endocytosis (GO:0006898)	11/19	0.000298097	0.0268814	-1.93626	15.7187	unc-11;aps-2;dyn-1;clic-1;ppt-1;unc-57;fcho-1;apa-2;rme-8;apb-1;rab-5
neuron development (GO:0048666)	14/28	0.000356388	0.0289261	-1.83674	14.5827	hlh-2;smu-2;bub-1;nab-1;ptl-1;sax-1;sax-2;zig-4;smu-1;cog-1;mec-8;manf-1;unc-40;daf-5
cellular protein modification process (GO:0006464)	58/191	0.000375465	0.0289261	-1.12254	8.85387	pdk-1;cmk-1;cdk-12;epg-6;otpl-2;ppfr-1;sax-1;ogt-1;cdk-11.2;aman-2;vhp-1;egl-4;F49C5.4;mak-1;dkf-2;atg-18;pct-1;unc-43;oga-1;max-2;akt-2;akt-1;pkc-1;aak-2;B0024.15;mbk-2;F28C10.3;Y67D8A.2;unc-51;C14B9.8;daf-18;ckk-1;tlk-1;rsks-1;dep-1;gakh-1;lit-1;mom-1;pptr-2;pptr-1;par-1;kin-1;mlk-1;C24F3.2;chk-1;jkk-1;pig-1;cdk-5;cdk-9;kin-29;F59F4.2;cdk-7;R12E2.13;sad-1;mpk-1;ubl-5;ire-1;fem-2
ubiquitin-dependent protein catabolic process (GO:0006511)	35/101	0.000377379	0.0289261	-1.42478	11.2305	tli-1;unc-11;ubc-3;ncl-1;cul-4;spsb-1;ego-2;wdr-23;ubc-21;oxi-1;pas-5;siah-1;otub-2;mel-26;tag-349;rpt-1;bath-44;Y92H12A.2;bath-43;rpn-5;hecw-1;rpn-9;ubxn-2;rpn-2;pbs-7;rpn-11;ufd-3;rpn-12;lin-41;pbs-1;T12E12.1;pbs-2;ubc-7;pbs-3;ubc-8
proteasome-mediated ubiquitin-dependent protein catabolic process (GO:0043161)	36/105	0.000396465	0.0289419	-1.02741	8.04761	ubc-3;hsp-3;ncl-1;cul-4;B0393.3;gfi-3;spsb-1;wdr-23;ubc-21;pas-5;siah-1;cdc-48.1;mel-26;rpt-1;bath-44;Y92H12A.2;marc-6;bath-43;rpn-5;hecw-1;rpt-6;rpt-3;ubxn-2;rpn-2;npp-20;pbs-7;ufd-2;rpn-11;ufd-3;rpn-12;lin-41;pbs-1;pbs-2;ubc-7;pbs-3;fbxl-1
clathrin-dependent endocytosis (GO:0072583)	10/17	0.000476878	0.0332297	-2.40022	18.3575	lpd-3;unc-11;aps-2;clic-1;inpp-1;snt-2;snt-3;unc-57;fcho-1;apa-2
dauer entry (GO:0043053)	11/20	0.000543278	0.0333389	-2.30756	17.348	dyf-11;daf-2;daf-1;osm-5;kin-29;daf-8;osm-3;daf-14;daf-4;fbxl-1;osm-1
positive regulation of defecation (GO:2000294)	8/12	0.000565435	0.0333389	-2.78703	20.8412	ric-7;egl-21;aex-6;aex-3;aex-4;nlp-40;dsc-1;aex-2
regulation of extent of cell growth (GO:0061387)	8/12	0.000565435	0.0333389	-2.59984	19.4414	unc-76;swan-1;tax-4;unc-69;ttx-3;sad-1;unc-51;daf-11
insulin receptor signaling pathway (GO:0008286)	8/12	0.000565435	0.0333389	-2.58926	19.3622	daf-2;hlh-13;daf-16;ist-1;dao-5;akt-2;akt-1;egl-4
response to axon injury (GO:0048678)	9/15	0.000761694	0.0432473	-2.17999	15.6523	fkh-9;mlk-1;hif-1;dlk-1;efa-6;mkk-4;unc-34;cebp-1;pmk-3
axon development (GO:0061564)	14/30	0.000863593	0.0472817	-1.5416	10.8751	fkh-9;unc-76;mlk-1;mkk-4;unc-34;ttx-3;pmk-3;cdk-5;dlk-1;sad-1;cebp-1;lin-11;fln-1;unc-51
negative regulation of dauer larval development (GO:0061067)	11/21	0.000936057	0.0494819	-2.31762	16.1627	daf-2;daf-28;daf-1;daf-8;daf-14;daf-11;egl-4;daf-4;ins-4;lin-42;ins-3

## Sheet: F2 F
WormBase Gene ID	Gene	Category	X-box	FKH-8 PEAK
WBGene00000174	aqp-6	Subtype-specific	YES	NO
WBGene00021349	arl-13	Core	YES	YES
WBGene00000907	daf-11	Subtype-specific	NO	NO
WBGene00001675	gpa-13	Subtype-specific	NO	NO
WBGene00000206	asb-1	Male	NO	NO
WBGene00000210	asg-2	Male	NO	YES
WBGene00022815	asic-1	Subtype-specific	NO	NO
WBGene00012137	asic-2	Subtype-specific	YES	NO
WBGene00000229	atp-2	Male	NO	YES
WBGene00000241	bbs-1	Core	YES	YES
WBGene00000242	bbs-2	Core	YES	NO
WBGene00043992	bbs-4	Core	YES	YES
WBGene00010974	bbs-5	Core	YES	YES
WBGene00000244	bbs-8	Core	YES	YES
WBGene00016744	bbs-9	Core	YES	NO
WBGene00021643	ccep-290	Core	YES	YES
WBGene00012779	cdkl-1	Expression	YES	NO
WBGene00022435	cfap-36	Core	YES	YES
WBGene00018051	che-10	Core	YES	NO
WBGene00000490	che-11	Core	YES	NO
WBGene00000491	che-12	Core	YES	YES
WBGene00000492	che-13	Core	YES	YES
WBGene00000484	che-2	Core	YES	YES
WBGene00000485	che-3	Core	NO	YES
WBGene00086546	cil-1	Male	YES	NO
WBGene00021017	cil-7	Male	YES	NO
WBGene00016626	clhm-1	Subtype-specific	YES	NO
WBGene00020246	clic-1	Core	NO	YES
WBGene00000563	cng-3	Subtype-specific	NO	YES
WBGene00009844	cwp-5	Male	YES	NO
WBGene00000906	daf-10	Core	YES	YES
WBGene00001665	gpa-3	Subtype-specific	NO	YES
WBGene00003969	pef-1	Subtype-specific	YES	NO
WBGene00016246	daf-37	Subtype-specific	NO	NO
WBGene00007395	dcar-1	Subtype-specific	NO	NO
WBGene00001007	dli-1	Core	NO	YES
WBGene00015927	dyci-1	Core	NO	YES
WBGene00001117	dyf-1	Core	YES	NO
WBGene00001127	dyf-11	Core	YES	YES
WBGene00001129	dyf-13	Core	YES	NO
WBGene00012673	dyf-17	Expression	YES	YES
WBGene00012826	dyf-19	Core	YES	YES
WBGene00001118	dyf-2	Core	YES	YES
WBGene00001119	dyf-3	Core	YES	YES
WBGene00001121	dyf-5	Core	YES	NO
WBGene00001122	dyf-6	Core	YES	YES
WBGene00001123	dyf-7	Core	YES	NO
WBGene00017014	dylt-2	Core	YES	YES
WBGene00001460	flp-17	Expression	NO	NO
WBGene00001518	gar-2	Subtype-specific	NO	NO
WBGene00008144	gasr-8	Expression	YES	YES
WBGene00001528	gcy-1	Subtype-specific	NO	NO
WBGene00001538	gcy-12	Subtype-specific	NO	NO
WBGene00001540	gcy-14	Subtype-specific	NO	NO
WBGene00001541	gcy-15	Subtype-specific	YES	NO
WBGene00001543	gcy-18	Subtype-specific	YES	NO
WBGene00001544	gcy-19	Subtype-specific	NO	NO
WBGene00001529	gcy-2	Subtype-specific	YES	NO
WBGene00001545	gcy-20	Subtype-specific	NO	NO
WBGene00001546	gcy-21	Subtype-specific	NO	YES
WBGene00001547	gcy-22	Subtype-specific	YES	NO
WBGene00001548	gcy-23	Subtype-specific	NO	NO
WBGene00001550	gcy-27	Subtype-specific	YES	NO
WBGene00007314	gcy-29	Subtype-specific	NO	NO
WBGene00001530	gcy-3	Subtype-specific	YES	NO
WBGene00001551	gcy-31	Subtype-specific	YES	NO
WBGene00001553	gcy-33	Subtype-specific	NO	YES
WBGene00001531	gcy-4	Subtype-specific	NO	YES
WBGene00001532	gcy-5	Subtype-specific	NO	NO
WBGene00001533	gcy-6	Subtype-specific	NO	NO
WBGene00001534	gcy-7	Subtype-specific	NO	NO
WBGene00001535	gcy-8	Subtype-specific	NO	NO
WBGene00001536	gcy-9	Subtype-specific	NO	NO
WBGene00017766	peli-1	Core	YES	YES
WBGene00010813	pitp-1	Subtype-specific	NO	NO
WBGene00015466	hyls-1	Core	YES	YES
WBGene00022696	ift-139	Core	YES	NO
WBGene00022465	ift-20	Core	YES	YES
WBGene00016005	ift-74	Core	YES	YES
WBGene00017973	ift-81	Core	YES	YES
WBGene00016935	ifta-1	Core	YES	YES
WBGene00012132	ifta-2	Core	NO	YES
WBGene00018727	jbts-14	Core	YES	NO
WBGene00019482	K07C11.10	Expression	YES	YES
WBGene00002182	kap-1	Core	NO	YES
WBGene00002196	kin-10	Male	NO	YES
WBGene00002222	klp-11	Core	YES	YES
WBGene00002230	klp-20	Core	NO	YES
WBGene00002218	klp-6	Male	YES	YES
WBGene00003058	lov-1	Male	YES	NO
WBGene00020100	mks-1	Core	YES	NO
WBGene00194710	mks-2	Core	YES	NO
WBGene00018042	mks-3	Core	YES	YES
WBGene00007490	mks-5	Core	YES	YES
WBGene00010642	mks-6	Core	YES	YES
WBGene00019364	mksr-1	Core	YES	NO
WBGene00021416	mksr-2	Core	YES	NO
WBGene00010898	nphp-1	Core	NO	YES
WBGene00021304	nphp-2	Core	YES	YES
WBGene00011261	nphp-4	Core	YES	NO
WBGene00021415	nsy-4	Subtype-specific	NO	NO
WBGene00008664	nubp-1	Core	NO	YES
WBGene00003829	nud-1	Expression	YES	NO
WBGene00003838	ocr-1	Subtype-specific	YES	YES
WBGene00003839	ocr-2	Subtype-specific	NO	NO
WBGene00003841	ocr-4	Subtype-specific	YES	NO
WBGene00003848	odr-1	Subtype-specific	NO	NO
WBGene00003856	odr-10	Subtype-specific	NO	YES
WBGene00003850	odr-3	Subtype-specific	NO	YES
WBGene00007167	rbg-3	Core	YES	YES
WBGene00006527	tax-6	Expression	NO	YES
WBGene00003883	osm-1	Core	YES	YES
WBGene00003892	osm-12	Core	YES	YES
WBGene00003884	osm-3	Core	YES	YES
WBGene00003885	osm-5	Core	YES	YES
WBGene00003886	osm-6	Core	YES	YES
WBGene00003889	osm-9	Subtype-specific	NO	YES
WBGene00000188	arl-3	Core	YES	YES
WBGene00000193	arl-6	Core	NO	YES
WBGene00000917	daf-25	Expression	NO	NO
WBGene00003851	odr-4	Subtype-specific	YES	YES
WBGene00004035	pkd-2	Subtype-specific	YES	NO
WBGene00004272	rab-8	Core	YES	YES
WBGene00018160	odr-8	Subtype-specific	YES	YES
WBGene00019536	rpi-2	Core	YES	YES
WBGene00020060	srab-16	Subtype-specific	NO	NO
WBGene00021477	srbc-64	Subtype-specific	NO	NO
WBGene00020746	srbc-66	Subtype-specific	YES	YES
WBGene00005101	srd-23	Subtype-specific	NO	NO
WBGene00005160	srg-2	Subtype-specific	YES	NO
WBGene00005193	srg-36	Subtype-specific	NO	NO
WBGene00005194	srg-37	Subtype-specific	NO	NO
WBGene00022408	srsx-3	Subtype-specific	YES	NO
WBGene00005701	sru-38	Subtype-specific	NO	NO
WBGene00006069	str-1	Subtype-specific	YES	NO
WBGene00006163	str-112	Subtype-specific	YES	NO
WBGene00006164	str-113	Subtype-specific	NO	NO
WBGene00006208	str-163	Subtype-specific	NO	YES
WBGene00006070	str-2	Subtype-specific	NO	NO
WBGene00006109	str-44	Subtype-specific	YES	NO
WBGene00017464	sulp-2	Subtype-specific	NO	NO
WBGene00006525	tax-2	Subtype-specific	YES	NO
WBGene00006526	tax-4	Subtype-specific	NO	YES
WBGene00015287	osta-1	Core	YES	YES
WBGene00006531	tba-5	Core	NO	NO
WBGene00006532	tba-6	Core	YES	NO
WBGene00006538	tbb-4	Core	YES	YES
WBGene00020490	tmc-1	Subtype-specific	NO	NO
WBGene00043308	tmem-107	Core	YES	YES
WBGene00008643	tmem-138	Core	YES	YES
WBGene00022733	tmem-17	Core	YES	YES
WBGene00044771	tmem-218	Core	YES	YES
WBGene00020825	tmem-231	Core	YES	NO
WBGene00007696	tram-1	Subtype-specific	NO	YES
WBGene00006616	trp-4	Subtype-specific	YES	NO
WBGene00007801	trpa-1	Subtype-specific	YES	NO
WBGene00006655	tub-1	Core	YES	YES
WBGene00006960	xbx-1	Core	YES	YES
WBGene00010864	xbx-3	Expression	YES	YES
WBGene00016025	xbx-4	Expression	YES	NO
WBGene00011974	xbx-5	Expression	YES	YES
WBGene00009580	xbx-6	Expression	YES	NO
WBGene00007604	xbx-9	Expression	YES	NO

## Sheet: X-box | Peak
Wormbase ID	Gene	Isoform	Chromosome	Gene Strand	minus 1 (from ATG)	minus 700 (from ATG)	X-box start (from ATG)	X-box end (from ATG)	X-box center (from ATG)	X-box central coord	ID Nearest Peak	Peak Start	Peak Ends	Center Peak	X-box to peak distance	Absolute distance	Unique X-box Region
WBGene00015287	osta-1	C01B12.4.1	chrII	+	5964	6663	-208	-189	-198.5	6162.5	1328	6334	6750	6542	-379.5	379.5	1
WBGene00015287	osta-1	C01B12.4.1	chrII	+	5964	6663	-529	-512	-520.5	6484.5	1328	6334	6750	6542	-57.5	57.5	2
WBGene00022435	cfap-36	Y108G3AL.3b.1	chrV	-	166732	166033	-675	-644	-659.5	166072	3507	173408	173824	173616	-7543.5	7543.5	3
WBGene00022435	cfap-36	Y108G3AL.3b.1	chrV	-	166732	166033	-236	-217	-226.5	166506	3507	173408	173824	173616	-7110.5	7110.5	4
WBGene00000484	che-2	F38G1.1.1	chrX	+	480752	481451	-133	-114	-123.5	480876	4689	481112	481528	481320	-444.5	444.5	5
WBGene00000484	che-2	F38G1.1.2	chrX	+	480752	481451	-133	-114	-123.5	480876	4689	481112	481528	481320	-444.5	444.5	5
WBGene00001127	dyf-11	C02H7.1.1	chrX	+	763068	763767	-198	-179	-188.5	763256	4864	763499	763656	763578	-321	321	6
WBGene00003969	pef-1	F23H11.8a.1	chrIII	-	926936	926237	-661	-644	-652.5	926284	2308	889106	889522	889314	36969.5	36969.5	7
WBGene00003969	pef-1	F23H11.8c.1	chrIII	-	926936	926237	-661	-644	-652.5	926284	2308	889106	889522	889314	36969.5	36969.5	7
WBGene00019364	mksr-1	K03E6.4.1	chrX	-	1069730	1069031	-690	-671	-680.5	1.06905e+06	4048	1064000	1064416	1064208	4841.5	4841.5	8
WBGene00019364	mksr-1	K03E6.4.1	chrX	-	1069730	1069031	-87	-68	-77.5	1.06965e+06	4048	1064000	1064416	1064208	5444.5	5444.5	9
WBGene00019536	rpi-2	K08D12.2.1	chrIV	+	1710578	1711277	-87	-68	-77.5	1.71066e+06	2658	1711119	1711238	1.71118e+06	-523	523	10
WBGene00021304	nphp-2	Y32G9A.6a.1	chrV	+	1895096	1895795	-190	-171	-180.5	1.89528e+06	3536	1895410	1895826	1895618	-341.5	341.5	11
WBGene00021304	nphp-2	Y32G9A.6d.1	chrV	+	1895096	1895795	-190	-171	-180.5	1.89528e+06	3536	1895410	1895826	1895618	-341.5	341.5	11
WBGene00021304	nphp-2	Y32G9A.6a.1	chrV	+	1895096	1895795	-606	-587	-596.5	1.89569e+06	3536	1895410	1895826	1895618	74.5	74.5	12
WBGene00021304	nphp-2	Y32G9A.6d.1	chrV	+	1895096	1895795	-606	-587	-596.5	1.89569e+06	3536	1895410	1895826	1895618	74.5	74.5	12
WBGene00021349	arl-13	Y37E3.5a.1	chrI	+	2065052	2065751	-118	-99	-108.5	2.06516e+06	270	2065424	2065840	2065632	-471.5	471.5	13
WBGene00021349	arl-13	Y37E3.5b.1	chrI	+	2065052	2065751	-118	-99	-108.5	2.06516e+06	270	2065424	2065840	2065632	-471.5	471.5	13
WBGene00016025	xbx-4	C23H5.3.1	chrIV	+	2113973	2114672	-85	-66	-75.5	2.11405e+06	2702	2078796	2079212	2079004	35044.5	35044.5	14
WBGene00021416	mksr-2	Y38F2AL.2.1	chrIV	-	2307240	2306541	-69	-50	-59.5	2.30718e+06	2709	2348888	2349304	2349096	-41915.5	41915.5	15
WBGene00001551	gcy-31	T07D1.1d.1	chrX	-	2427669	2426970	-639	-626	-632.5	2.42704e+06	4549	2401903	2402319	2402111	24925.5	24925.5	16
WBGene00001551	gcy-31	T07D1.1c.1	chrX	-	2428148	2427449	-160	-147	-153.5	2.42799e+06	4549	2401903	2402319	2402111	25883.5	25883.5	17
WBGene00001551	gcy-31	T07D1.1a.1	chrX	-	2428197	2427498	-111	-98	-104.5	2.42809e+06	4549	2401903	2402319	2402111	25981.5	25981.5	18
WBGene00001551	gcy-31	T07D1.1b.1	chrX	-	2428197	2427498	-111	-98	-104.5	2.42809e+06	4549	2401903	2402319	2402111	25981.5	25981.5	18
WBGene00003885	osm-5	Y41G9A.1.1	chrX	+	2983568	2984267	-70	-51	-60.5	2.98363e+06	4581	2984081	2984284	2.98418e+06	-554	554	19
WBGene00003885	osm-5	Y41G9A.1.1	chrX	+	2983568	2984267	-122	-99	-110.5	2.98368e+06	4581	2984081	2984284	2.98418e+06	-504	504	20
WBGene00020100	mks-1	R148.1a.1	chrIII	+	3185991	3186690	-72	-53	-62.5	3.18605e+06	1870	3220296	3220712	3220504	-34450.5	34450.5	21
WBGene00020100	mks-1	R148.1b.1	chrIII	-	3186690	3185991	-72	-53	-62.5	3.18663e+06	1870	3220296	3220712	3220504	-33876.5	33876.5	22
WBGene00001541	gcy-15	ZC239.7.1	chrII	-	3197769	3197070	-686	-673	-679.5	3.19709e+06	1135	3156838	3157254	3157046	40043.5	40043.5	23
WBGene00001119	dyf-3	C04C3.5a.1	chrIV	-	3399310	3398611	-601	-582	-591.5	3.39872e+06	2764	3399011	3399427	3399219	-500.5	500.5	24
WBGene00001119	dyf-3	C04C3.5b.1	chrIV	-	3399820	3399121	-618	-599	-608.5	3.39921e+06	2764	3399011	3399427	3399219	-7.5	7.5	25
WBGene00001119	dyf-3	C04C3.5c.1	chrIV	-	3399587	3398888	-324	-305	-314.5	3.39927e+06	2764	3399011	3399427	3399219	53.5	53.5	26
WBGene00001119	dyf-3	C04C3.5b.1	chrIV	-	3399820	3399121	-91	-72	-81.5	3.39974e+06	2764	3399011	3399427	3399219	519.5	519.5	27
WBGene00021643	ccep-290	Y47G6A.17.1	chrI	-	3500409	3499710	-73	-54	-63.5	3.50035e+06	327	3501141	3501557	3501349	-1003.5	1003.5	28
WBGene00020746	srbc-66	T24A6.5.1	chrV	+	3530000	3530699	-503	-485	-494	3530494	3651	3530425	3530841	3530633	-139	139	29
WBGene00004272	rab-8	D1037.4.1	chrI	-	3684762	3684063	-637	-620	-628.5	3.68413e+06	337	3684393	3684809	3684601	-467.5	467.5	30
WBGene00004272	rab-8	D1037.4.2	chrI	-	3684762	3684063	-637	-620	-628.5	3.68413e+06	337	3684393	3684809	3684601	-467.5	467.5	30
WBGene00003884	osm-3	M02B7.3a.1	chrIV	-	3799781	3799082	-118	-101	-109.5	3.79967e+06	2781	3799344	3799760	3799552	119.5	119.5	31
WBGene00011974	xbx-5	T24A11.2.1	chrIII	-	3805049	3804350	-124	-105	-114.5	3.80493e+06	1913	3804260	3804676	3804468	466.5	466.5	32
WBGene00018051	che-10	F35D11.11d.1	chrII	-	4635263	4634564	-248	-227	-237.5	4.63503e+06	1196	4640716	4641132	4640924	-5898.5	5898.5	33
WBGene00018051	che-10	F35D11.11d.2	chrII	-	4635263	4634564	-248	-227	-237.5	4.63503e+06	1196	4640716	4641132	4640924	-5898.5	5898.5	33
WBGene00018051	che-10	F35D11.11d.3	chrII	-	4635263	4634564	-248	-227	-237.5	4.63503e+06	1196	4640716	4641132	4640924	-5898.5	5898.5	33
WBGene00007167	rbg-3	B0393.2.1	chrIII	+	4753884	4754583	-442	-429	-435.5	4.75432e+06	1990	4754215	4754403	4754309	10.5	10.5	34
WBGene00007167	rbg-3	B0393.2.2	chrIII	+	4753884	4754583	-442	-429	-435.5	4.75432e+06	1990	4754215	4754403	4754309	10.5	10.5	34
WBGene00021017	cil-7	W03G9.7.1	chrI	-	4990098	4989399	-599	-580	-589.5	4.98951e+06	425	4967402	4967818	4967610	21898.5	21898.5	35
WBGene00021017	cil-7	W03G9.7.1	chrI	-	4990098	4989399	-523	-510	-516.5	4.98958e+06	425	4967402	4967818	4967610	21971.5	21971.5	36
WBGene00021017	cil-7	W03G9.7.1	chrI	-	4990098	4989399	-476	-457	-466.5	4.98963e+06	425	4967402	4967818	4967610	22021.5	22021.5	37
WBGene00021017	cil-7	W03G9.7.1	chrI	-	4990098	4989399	-110	-91	-100.5	4.99e+06	425	4967402	4967818	4967610	22387.5	22387.5	38
WBGene00001117	dyf-1	F54C1.5a.1	chrI	-	4995280	4994581	-109	-90	-99.5	4.99518e+06	426	5017937	5018353	5018145	-22964.5	22964.5	39
WBGene00002218	klp-6	R144.1.1	chrIII	+	5030214	5030913	-604	-587	-595.5	5.03081e+06	2014	5031219	5031635	5031427	-617.5	617.5	40
WBGene00022465	ift-20	Y110A7A.20.1	chrI	+	5100069	5100768	-63	-44	-53.5	5.10012e+06	429	5100525	5100941	5100733	-610.5	610.5	41
WBGene00022465	ift-20	Y110A7A.20.1	chrI	+	5100069	5100768	-595	-582	-588.5	5.10066e+06	429	5100525	5100941	5100733	-75.5	75.5	42
WBGene00017973	ift-81	F32A6.2.1	chrX	+	5298018	5298717	-75	-56	-65.5	5.29808e+06	4727	5298135	5298551	5298343	-259.5	259.5	43
WBGene00016935	ifta-1	C54G7.4.1	chrX	-	5553361	5552662	-116	-97	-106.5	5.55325e+06	4743	5552668	5552854	5552761	493.5	493.5	44
WBGene00017766	peli-1	F25B4.2.1	chrV	+	5708706	5709405	-151	-132	-141.5	5.70885e+06	3763	5708984	5709400	5709192	-344.5	344.5	45
WBGene00017766	peli-1	F25B4.2.1	chrV	+	5708706	5709405	-169	-150	-159.5	5.70887e+06	3763	5708984	5709400	5709192	-326.5	326.5	46
WBGene00022696	ift-139	ZK328.7a.1	chrIII	-	6040083	6039384	-92	-73	-82.5	6.04e+06	2098	6058480	6058896	6058688	-18687.5	18687.5	47
WBGene00022696	ift-139	ZK328.7b.1	chrIII	-	6040083	6039384	-92	-73	-82.5	6.04e+06	2098	6058480	6058896	6058688	-18687.5	18687.5	47
WBGene00194710	mks-2	C30B5.9.1	chrII	-	6220066	6219367	-115	-96	-105.5	6.21996e+06	1320	6250725	6251141	6250933	-30972.5	30972.5	48
WBGene00005160	srg-2	C18F10.5.1	chrIII	-	6260863	6260164	-617	-604	-610.5	6.26025e+06	2115	6259197	6259613	6259405	847.5	847.5	49
WBGene00018160	odr-8	F38A5.1b.1	chrIV	-	6583307	6582608	-570	-553	-561.5	6.58275e+06	2936	6583000	6583416	6583208	-462.5	462.5	50
WBGene00018160	odr-8	F38A5.1b.2	chrIV	-	6583307	6582608	-570	-553	-561.5	6.58275e+06	2936	6583000	6583416	6583208	-462.5	462.5	50
WBGene00018160	odr-8	F38A5.1a.1	chrIV	-	6583349	6582650	-528	-511	-519.5	6.58283e+06	2936	6583000	6583416	6583208	-378.5	378.5	51
WBGene00016005	ift-74	C18H9.8a.1	chrII	+	6679400	6680099	-98	-79	-88.5	6.67949e+06	1353	6679787	6680203	6679995	-506.5	506.5	52
WBGene00016005	ift-74	C18H9.8a.1	chrII	+	6679400	6680099	-167	-148	-157.5	6.67956e+06	1353	6679787	6680203	6679995	-437.5	437.5	53
WBGene00016005	ift-74	C18H9.8a.1	chrII	+	6679400	6680099	-419	-406	-412.5	6.67981e+06	1353	6679787	6680203	6679995	-182.5	182.5	54
WBGene00016005	ift-74	C18H9.8b.1	chrII	+	6679614	6680313	-312	-293	-302.5	6.67992e+06	1353	6679787	6680203	6679995	-78.5	78.5	55
WBGene00016005	ift-74	C18H9.8b.1	chrII	+	6679614	6680313	-381	-362	-371.5	6.67999e+06	1353	6679787	6680203	6679995	-9.5	9.5	56
WBGene00016005	ift-74	C18H9.8b.1	chrII	+	6679614	6680313	-633	-620	-626.5	6.68024e+06	1353	6679787	6680203	6679995	245.5	245.5	57
WBGene00003851	odr-4	Y102E9.1b.1	chrIII	+	6730479	6731178	-456	-439	-447.5	6.73093e+06	2149	6730447	6730863	6730655	271.5	271.5	58
WBGene00003851	odr-4	Y102E9.1c.1	chrIII	+	6730479	6731178	-456	-439	-447.5	6.73093e+06	2149	6730447	6730863	6730655	271.5	271.5	58
WBGene00003851	odr-4	Y102E9.1a.1	chrIII	+	6731419	6732118	-203	-184	-193.5	6.73161e+06	2149	6730447	6730863	6730655	957.5	957.5	59
WBGene00003851	odr-4	Y102E9.1a.2	chrIII	+	6731419	6732118	-203	-184	-193.5	6.73161e+06	2149	6730447	6730863	6730655	957.5	957.5	59
WBGene00003851	odr-4	Y102E9.1a.3	chrIII	+	6731419	6732118	-203	-184	-193.5	6.73161e+06	2149	6730447	6730863	6730655	957.5	957.5	59
WBGene00003851	odr-4	Y102E9.1a.4	chrIII	+	6731419	6732118	-203	-184	-193.5	6.73161e+06	2149	6730447	6730863	6730655	957.5	957.5	59
WBGene00000244	bbs-8	T25F10.5.1	chrV	-	6765700	6765001	-380	-363	-371.5	6.76533e+06	3825	6764889	6765305	6765097	231.5	231.5	60
WBGene00000244	bbs-8	T25F10.5.1	chrV	-	6765700	6765001	-87	-68	-77.5	6.76562e+06	3825	6764889	6765305	6765097	525.5	525.5	61
WBGene00016626	clhm-1	C44B7.4.1	chrII	-	6871496	6870797	-291	-278	-284.5	6.87121e+06	1372	6858819	6859235	6859027	12184.5	12184.5	62
WBGene00016626	clhm-1	C44B7.4.1	chrII	-	6871496	6870797	-135	-116	-125.5	6.87137e+06	1372	6858819	6859235	6859027	12343.5	12343.5	63
WBGene00016744	bbs-9	C48B6.8.1	chrI	-	6923654	6922955	-84	-65	-74.5	6.92358e+06	557	6945571	6945987	6945779	-22199.5	22199.5	64
WBGene00022733	tmem-17	ZK418.3.1	chrIII	+	7069521	7070220	-207	-188	-197.5	7.06972e+06	2165	7068682	7069098	7068890	828.5	828.5	65
WBGene00022733	tmem-17	ZK418.3.1	chrIII	+	7069521	7070220	-658	-645	-651.5	7.07017e+06	2165	7068682	7069098	7068890	1282.5	1282.5	66
WBGene00006163	str-112	F10D2.4.1	chrV	-	7139098	7138399	-654	-637	-645.5	7.13845e+06	3857	7140478	7140894	7140686	-2233.5	2233.5	67
WBGene00010642	mks-6	K07G5.3.1	chrI	+	7160314	7161013	-74	-55	-64.5	7.16038e+06	574	7160736	7161152	7160944	-565.5	565.5	68
WBGene00001129	dyf-13	C27H5.7b.1	chrII	-	7171814	7171115	-680	-663	-671.5	7.17114e+06	1393	7181355	7181771	7181563	-10420.5	10420.5	69
WBGene00001129	dyf-13	C27H5.7a.1	chrII	-	7171930	7171231	-564	-547	-555.5	7.17137e+06	1548	9498440	9498856	9498648	-10188.5	10188.5	70
WBGene00001129	dyf-13	C27H5.7b.1	chrII	-	7171814	7171115	-222	-203	-212.5	7.1716e+06	1393	7181355	7181771	7181563	-9961.5	9961.5	71
WBGene00001129	dyf-13	C27H5.7a.1	chrII	-	7171930	7171231	-106	-87	-96.5	7.17183e+06	1393	7181355	7181771	7181563	-9729.5	9729.5	72
WBGene00006069	str-1	C42D4.5.1	chrIV	+	7173077	7173776	-569	-556	-562.5	7.17364e+06	2979	7168202	7168618	7168410	5229.5	5229.5	73
WBGene00006069	str-1	C42D4.5.1	chrIV	+	7173077	7173776	-665	-646	-655.5	7.17373e+06	2979	7168202	7168618	7168410	5322.5	5322.5	74
WBGene00006109	str-44	C42D4.4.1	chrIV	+	7176475	7177174	-620	-603	-611.5	7.17709e+06	2979	7168202	7168618	7168410	8676.5	8676.5	75
WBGene00015466	hyls-1	C05C8.9a.1	chrV	+	7236840	7237539	-281	-262	-271.5	7.23711e+06	3862	7237072	7237488	7237280	-168.5	168.5	76
WBGene00015466	hyls-1	C05C8.9a.2	chrV	+	7236840	7237539	-281	-262	-271.5	7.23711e+06	3862	7237072	7237488	7237280	-168.5	168.5	76
WBGene00015466	hyls-1	C05C8.9b.1	chrV	+	7236840	7237539	-281	-262	-271.5	7.23711e+06	3862	7237072	7237488	7237280	-168.5	168.5	76
WBGene00015466	hyls-1	C05C8.9b.2	chrV	+	7236840	7237539	-281	-262	-271.5	7.23711e+06	3862	7237072	7237488	7237280	-168.5	168.5	76
WBGene00003841	ocr-4	Y40C5A.2.1	chrIV	-	7333433	7332734	-485	-468	-476.5	7.33296e+06	2988	7319941	7320357	7320149	12807.5	12807.5	77
WBGene00003841	ocr-4	Y40C5A.2.1	chrIV	-	7333433	7332734	-399	-382	-390.5	7.33304e+06	2988	7319941	7320357	7320149	12893.5	12893.5	78
WBGene00012137	asic-2	T28F4.2.1	chrI	+	7479431	7480130	-65	-46	-55.5	7.47949e+06	596	7475138	7475487	7.47531e+06	4174	4174	79
WBGene00018042	mks-3	F35D2.4.1	chrII	-	7584209	7583510	-162	-143	-152.5	7.58406e+06	1420	7583462	7583878	7583670	386.5	386.5	80
WBGene00000242	bbs-2	F20D12.3.1	chrIV	+	7933416	7934115	-55	-36	-45.5	7.93346e+06	3019	7946864	7947280	7947072	-13610.5	13610.5	81
WBGene00000242	bbs-2	F20D12.3.1	chrIV	+	7933416	7934115	-97	-78	-87.5	7.9335e+06	3019	7946864	7947280	7947072	-13568.5	13568.5	82
WBGene00022408	srsx-3	Y97E10B.9.1	chrV	-	7937932	7937233	-344	-331	-337.5	7.93759e+06	3896	7946057	7946473	7946265	-8670.5	8670.5	83
WBGene00008643	tmem-138	F10B5.9.1	chrII	+	8156610	8157309	-171	-152	-161.5	8.15677e+06	1469	8156925	8157341	8157133	-361.5	361.5	84
WBGene00008643	tmem-138	F10B5.9.1	chrII	+	8156610	8157309	-258	-239	-248.5	8.15686e+06	1469	8156925	8157341	8157133	-274.5	274.5	85
WBGene00006655	tub-1	F10B5.4.1	chrII	-	8157585	8156886	-273	-254	-263.5	8.15732e+06	1469	8156925	8157341	8157133	188.5	188.5	86
WBGene00006655	tub-1	F10B5.4.1	chrII	-	8157585	8156886	-186	-167	-176.5	8.15741e+06	1469	8156925	8157341	8157133	275.5	275.5	87
WBGene00086546	cil-1	C50C3.7.1	chrIII	-	8161967	8161268	-410	-391	-400.5	8.16157e+06	2248	8163903	8164083	8163993	-2426.5	2426.5	88
WBGene00086546	cil-1	C50C3.7.1	chrIII	-	8161967	8161268	-364	-345	-354.5	8.16161e+06	2248	8163903	8164083	8163993	-2380.5	2380.5	89
WBGene00086546	cil-1	C50C3.7.1	chrIII	-	8161967	8161268	-99	-82	-90.5	8.16188e+06	2248	8163903	8164083	8163993	-2116.5	2116.5	90
WBGene00019482	K07C11.10	K07C11.10.1	chrV	-	8227532	8226833	-670	-653	-661.5	8.22687e+06	3908	8226663	8227079	8226871	-0.5	0.5	91
WBGene00020825	tmem-231	T26A8.2.1	chrIV	+	8426348	8427047	-333	-314	-323.5	8.42667e+06	3048	8428572	8428988	8428780	-2108.5	2108.5	92
WBGene00018727	jbts-14	F53A9.4.1	chrX	+	8703557	8704256	-70	-57	-63.5	8.70362e+06	4950	8696057	8696473	8696265	7355.5	7355.5	93
WBGene00002222	klp-11	F20C5.2f.1	chrIV	-	8757834	8757135	-498	-479	-488.5	8.75735e+06	3070	8758595	8759011	8758803	-1457.5	1457.5	94
WBGene00002222	klp-11	F20C5.2d.1	chrIV	-	8758203	8757504	-129	-110	-119.5	8.75808e+06	3070	8758595	8759011	8758803	-719.5	719.5	95
WBGene00002222	klp-11	F20C5.2a.1	chrIV	-	8762683	8761984	-47	-30	-38.5	8.76264e+06	3071	8762403	8762819	8762611	33.5	33.5	96
WBGene00017014	dylt-2	D1009.5.1	chrX	-	8940789	8940090	-529	-516	-522.5	8.94027e+06	4971	8939975	8940391	8940183	83.5	83.5	97
WBGene00017014	dylt-2	D1009.5.1	chrX	-	8940789	8940090	-96	-77	-86.5	8.9407e+06	4971	8939975	8940391	8940183	519.5	519.5	98
WBGene00017014	dylt-2	D1009.5.1	chrX	-	8940789	8940090	-80	-61	-70.5	8.94072e+06	4971	8939975	8940391	8940183	535.5	535.5	99
WBGene00006532	tba-6	F32H2.9.1	chrI	+	8993344	8994043	-94	-77	-85.5	8.99343e+06	703	9014127	9014543	9014335	-20905.5	20905.5	100
WBGene00006532	tba-6	F32H2.9.1	chrI	+	8993344	8994043	-182	-163	-172.5	8.99352e+06	703	9014127	9014543	9014335	-20818.5	20818.5	101
WBGene00006525	tax-2	F36F2.5.1	chrI	+	9020238	9020937	-359	-342	-350.5	9.02059e+06	703	9014127	9014543	9014335	6253.5	6253.5	102
WBGene00000906	daf-10	F23B2.4.1	chrIV	-	9146882	9146183	-80	-61	-70.5	9.14681e+06	3091	9146903	9147319	9147111	-299.5	299.5	103
WBGene00001121	dyf-5	M04C9.5a.1	chrI	+	9358445	9359144	-288	-269	-278.5	9.35872e+06	730	9371834	9372250	9372042	-13318.5	13318.5	104
WBGene00001121	dyf-5	M04C9.5b.1	chrI	+	9358445	9359144	-288	-269	-278.5	9.35872e+06	730	9371834	9372250	9372042	-13318.5	13318.5	104
WBGene00006538	tbb-4	B0272.1.1	chrX	-	9437532	9436833	-238	-219	-228.5	9.4373e+06	4999	9436971	9437109	9437040	263.5	263.5	105
WBGene00001530	gcy-3	R134.1.1	chrII	-	9507922	9507223	-559	-542	-550.5	9.50737e+06	1548	9498440	9498856	9498648	8723.5	8723.5	106
WBGene00001530	gcy-3	R134.1.1	chrII	-	9507922	9507223	-128	-109	-118.5	9.5078e+06	1548	9498440	9498856	9498648	9155.5	9155.5	107
WBGene00001529	gcy-2	R134.2.1	chrII	-	9512736	9512037	-610	-593	-601.5	9.51213e+06	835	10719931	10720347	10720139	13486.5	13486.5	108
WBGene00043992	bbs-4	F58A4.14b.1	chrIII	-	9611533	9610834	-559	-540	-549.5	9.61098e+06	2350	9611967	9612383	9612175	-1191.5	1191.5	109
WBGene00043992	bbs-4	F58A4.14a.1	chrIII	-	9612807	9612108	-67	-48	-57.5	9.61275e+06	2350	9611967	9612383	9612175	574.5	574.5	110
WBGene00001123	dyf-7	C43C3.3.1	chrX	+	9697922	9698621	-109	-90	-99.5	9.69802e+06	5017	9705515	9705931	9705723	-7701.5	7701.5	111
WBGene00009580	xbx-6	F40F9.1a.1	chrV	+	9704635	9705334	-154	-135	-144.5	9.70478e+06	3997	9704371	9704787	9704579	200.5	200.5	112
WBGene00009580	xbx-6	F40F9.1a.2	chrV	+	9704635	9705334	-154	-135	-144.5	9.70478e+06	3997	9704371	9704787	9704579	200.5	200.5	112
WBGene00009580	xbx-6	F40F9.1a.3	chrV	+	9704635	9705334	-154	-135	-144.5	9.70478e+06	3997	9704371	9704787	9704579	200.5	200.5	112
WBGene00009580	xbx-6	F40F9.1b.1	chrV	+	9704635	9705334	-154	-135	-144.5	9.70478e+06	3997	9704371	9704787	9704579	200.5	200.5	112
WBGene00009580	xbx-6	F40F9.1b.2	chrV	+	9704635	9705334	-154	-135	-144.5	9.70478e+06	3997	9704371	9704787	9704579	200.5	200.5	112
WBGene00009580	xbx-6	F40F9.1b.3	chrV	+	9704635	9705334	-154	-135	-144.5	9.70478e+06	3997	9704371	9704787	9704579	200.5	200.5	112
WBGene00009580	xbx-6	F40F9.1a.1	chrV	+	9704635	9705334	-506	-493	-499.5	9.70513e+06	3998	9704971	9705387	9705179	-44.5	44.5	113
WBGene00009580	xbx-6	F40F9.1a.2	chrV	+	9704635	9705334	-506	-493	-499.5	9.70513e+06	3998	9704971	9705387	9705179	-44.5	44.5	113
WBGene00009580	xbx-6	F40F9.1a.3	chrV	+	9704635	9705334	-506	-493	-499.5	9.70513e+06	3998	9704971	9705387	9705179	-44.5	44.5	113
WBGene00009580	xbx-6	F40F9.1b.1	chrV	+	9704635	9705334	-506	-493	-499.5	9.70513e+06	3998	9704971	9705387	9705179	-44.5	44.5	113
WBGene00009580	xbx-6	F40F9.1b.2	chrV	+	9704635	9705334	-506	-493	-499.5	9.70513e+06	3998	9704971	9705387	9705179	-44.5	44.5	113
WBGene00009580	xbx-6	F40F9.1b.3	chrV	+	9704635	9705334	-506	-493	-499.5	9.70513e+06	3998	9704971	9705387	9705179	-44.5	44.5	113
WBGene00010864	xbx-3	M04D8.6.1	chrIII	+	10035256	10035955	-100	-81	-90.5	1.00353e+07	1584	10035711	10036031	10035871	-524.5	524.5	114
WBGene00003058	lov-1	ZK945.9.1	chrII	-	10122466	10121767	-178	-161	-169.5	1.01223e+07	791	10132737	10133153	10132945	-10648.5	10648.5	115
WBGene00010974	bbs-5	R01H10.6.1	chrIII	-	10262267	10261568	-68	-49	-58.5	1.02622e+07	1597	10261413	10261829	10261621	587.5	587.5	116
WBGene00000491	che-12	B0024.8b.1	chrV	-	10304265	10303566	-158	-139	-148.5	1.03041e+07	3166	10307253	10307669	10307461	-3344.5	3344.5	117
WBGene00000491	che-12	B0024.8a.1	chrV	-	10308029	10307330	-224	-205	-214.5	1.03078e+07	3166	10307253	10307669	10307461	353.5	353.5	118
WBGene00001122	dyf-6	F46F6.4a.1	chrX	-	10387098	10386399	-293	-276	-284.5	1.03868e+07	4034	10386742	10387158	10386950	-136.5	136.5	119
WBGene00001122	dyf-6	F46F6.4b.1	chrX	-	10387098	10386399	-293	-276	-284.5	1.03868e+07	4034	10386742	10387158	10386950	-136.5	136.5	119
WBGene00001122	dyf-6	F46F6.4a.1	chrX	-	10387098	10386399	-101	-82	-91.5	1.0387e+07	4034	10386742	10387158	10386950	56.5	56.5	120
WBGene00001122	dyf-6	F46F6.4b.1	chrX	-	10387098	10386399	-101	-82	-91.5	1.0387e+07	4034	10386742	10387158	10386950	56.5	56.5	120
WBGene00000492	che-13	F59C6.7a.1	chrI	-	10516195	10515496	-77	-58	-67.5	1.05161e+07	30	10517118	10517347	1.05172e+07	-1105	1105	121
WBGene00000174	aqp-6	C32C4.2b.1	chrV	+	10647725	10648424	-272	-253	-262.5	1.0648e+07	3182	10677433	10677849	10677641	-29653.5	29653.5	122
WBGene00000174	aqp-6	C32C4.2c.1	chrV	+	10648057	10648756	-66	-53	-59.5	1.06481e+07	3182	10677433	10677849	10677641	-29524.5	29524.5	123
WBGene00000174	aqp-6	C32C4.2b.1	chrV	+	10647725	10648424	-492	-479	-485.5	1.06482e+07	3182	10677433	10677849	10677641	-29430.5	29430.5	124
WBGene00000174	aqp-6	C32C4.2c.1	chrV	+	10648057	10648756	-604	-585	-594.5	1.06487e+07	3182	10677433	10677849	10677641	-28989.5	28989.5	125
WBGene00000174	aqp-6	C32C4.2a.1	chrV	+	10650013	10650712	-93	-75	-84	10650097	3182	10677433	10677849	10677641	-27544	27544	126
WBGene00007490	mks-5	C09G5.8a.1	chrII	+	10719520	10720219	-121	-102	-111.5	1.07196e+07	835	10719931	10720347	10720139	-507.5	507.5	127
WBGene00007490	mks-5	C09G5.8a.1	chrII	+	10719520	10720219	-297	-278	-287.5	1.07198e+07	835	10719931	10720347	10720139	-331.5	331.5	128
WBGene00007490	mks-5	C09G5.8a.1	chrII	+	10719520	10720219	-577	-558	-567.5	1.07201e+07	1393	7181355	7181771	7181563	-51.5	51.5	129
WBGene00003838	ocr-1	F28H7.10a.1	chrV	+	10763646	10764345	-313	-296	-304.5	1.0764e+07	3190	10762874	10763290	10763082	868.5	868.5	130
WBGene00003838	ocr-1	F28H7.10a.1	chrV	+	10763646	10764345	-460	-443	-451.5	1.07641e+07	3190	10762874	10763290	10763082	1015.5	1015.5	131
WBGene00003838	ocr-1	F28H7.10b.1	chrV	+	10767651	10768350	-417	-398	-407.5	1.07681e+07	3190	10762874	10763290	10763082	4976.5	4976.5	132
WBGene00003838	ocr-1	F28H7.10b.1	chrV	+	10767651	10768350	-555	-536	-545.5	1.07682e+07	3190	10762874	10763290	10763082	5114.5	5114.5	133
WBGene00012779	cdkl-1	Y42A5A.4b.1	chrV	+	11098263	11098962	-230	-217	-223.5	1.10985e+07	3227	11113131	11113547	11113339	-14852.5	14852.5	134
WBGene00012779	cdkl-1	Y42A5A.4c.1	chrV	+	11102324	11103023	-214	-197	-205.5	1.11025e+07	3227	11113131	11113547	11113339	-10809.5	10809.5	135
WBGene00012779	cdkl-1	Y42A5A.4c.1	chrV	+	11102324	11103023	-334	-315	-324.5	1.11026e+07	3227	11113131	11113547	11113339	-10690.5	10690.5	136
WBGene00012779	cdkl-1	Y42A5A.4c.1	chrV	+	11102324	11103023	-388	-369	-378.5	1.11027e+07	3227	11113131	11113547	11113339	-10636.5	10636.5	137
WBGene00012779	cdkl-1	Y42A5A.4a.1	chrV	+	11104781	11105480	-567	-548	-557.5	1.11053e+07	3227	11113131	11113547	11113339	-8000.5	8000.5	138
WBGene00011261	nphp-4	R13H4.1.1	chrV	-	11844306	11843607	-171	-152	-161.5	1.18441e+07	3270	11852264	11852680	11852472	-8327.5	8327.5	139
WBGene00011261	nphp-4	R13H4.1.1	chrV	-	11844306	11843607	-70	-57	-63.5	1.18442e+07	3270	11852264	11852680	11852472	-8229.5	8229.5	140
WBGene00007801	trpa-1	C29E6.2a.1	chrIV	+	11863824	11864523	-185	-166	-175.5	1.1864e+07	2500	11867817	11868233	11868025	-4025.5	4025.5	141
WBGene00007801	trpa-1	C29E6.2b.1	chrIV	+	11863824	11864523	-185	-166	-175.5	1.1864e+07	2500	11867817	11868233	11868025	-4025.5	4025.5	141
WBGene00007801	trpa-1	C29E6.2a.1	chrIV	+	11863824	11864523	-567	-554	-560.5	1.18644e+07	2500	11867817	11868233	11868025	-3640.5	3640.5	142
WBGene00007801	trpa-1	C29E6.2b.1	chrIV	+	11863824	11864523	-567	-554	-560.5	1.18644e+07	2500	11867817	11868233	11868025	-3640.5	3640.5	142
WBGene00003886	osm-6	R31.3.1	chrV	-	11928087	11927388	-304	-287	-295.5	1.19278e+07	3278	11927243	11927659	11927451	340.5	340.5	143
WBGene00003886	osm-6	R31.3.1	chrV	-	11928087	11927388	-103	-84	-93.5	1.1928e+07	3278	11927243	11927659	11927451	542.5	542.5	144
WBGene00000490	che-11	C27A7.4.1	chrV	-	12151370	12150671	-387	-370	-378.5	1.2151e+07	3295	12190917	12191333	12191125	-40133.5	40133.5	145
WBGene00000490	che-11	C27A7.4.1	chrV	-	12151370	12150671	-88	-69	-78.5	1.21513e+07	3295	12190917	12191333	12191125	-39833.5	39833.5	146
WBGene00003892	osm-12	Y75B8A.12.1	chrIII	-	12203049	12202350	-110	-91	-100.5	1.22029e+07	1715	12202255	12202671	12202463	485.5	485.5	147
WBGene00007604	xbx-9	C15C8.1.1	chrV	+	12733536	12734235	-126	-107	-116.5	1.27337e+07	3318	12728355	12728547	12728451	5201.5	5201.5	148
WBGene00001543	gcy-18	ZK896.8.1	chrIV	+	12859413	12860112	-281	-268	-274.5	1.28597e+07	2537	12845502	12845918	12845710	13977.5	13977.5	149
WBGene00001543	gcy-18	ZK896.8.1	chrIV	+	12859413	12860112	-367	-350	-358.5	1.28598e+07	2537	12845502	12845918	12845710	14061.5	14061.5	150
WBGene00001543	gcy-18	ZK896.8.1	chrIV	+	12859413	12860112	-426	-413	-419.5	1.28598e+07	2537	12845502	12845918	12845710	14122.5	14122.5	151
WBGene00001543	gcy-18	ZK896.8.1	chrIV	+	12859413	12860112	-477	-460	-468.5	1.28599e+07	2537	12845502	12845918	12845710	14171.5	14171.5	152
WBGene00009844	cwp-5	F48C11.2b.1	chrX	-	13186277	13185578	-230	-217	-223.5	1.31861e+07	4218	13181922	13182338	13182130	3923.5	3923.5	153
WBGene00009844	cwp-5	F48C11.2b.1	chrX	-	13186277	13185578	-195	-178	-186.5	1.31861e+07	4218	13181922	13182338	13182130	3960.5	3960.5	154
WBGene00009844	cwp-5	F48C11.2b.1	chrX	-	13186277	13185578	-102	-85	-93.5	1.31862e+07	4218	13181922	13182338	13182130	4053.5	4053.5	155
WBGene00009844	cwp-5	F48C11.2b.1	chrX	-	13186277	13185578	-83	-64	-73.5	1.31862e+07	4218	13181922	13182338	13182130	4073.5	4073.5	156
WBGene00003829	nud-1	F53A2.4.1	chrIII	+	13340729	13341428	-266	-247	-256.5	1.3341e+07	1777	13347808	13348224	13348016	-7030.5	7030.5	157
WBGene00003829	nud-1	F53A2.4.1	chrIII	+	13340729	13341428	-452	-433	-442.5	1.33412e+07	1777	13347808	13348224	13348016	-6844.5	6844.5	158
WBGene00001118	dyf-2	ZK520.3b.1	chrIII	-	13679105	13678406	-431	-414	-422.5	1.36787e+07	1793	13686204	13686620	13686412	-7729.5	7729.5	159
WBGene00001118	dyf-2	ZK520.3b.2	chrIII	-	13679105	13678406	-431	-414	-422.5	1.36787e+07	1793	13686204	13686620	13686412	-7729.5	7729.5	159
WBGene00001118	dyf-2	ZK520.3a.1	chrIII	-	13687044	13686345	-156	-137	-146.5	1.36869e+07	1793	13686204	13686620	13686412	485.5	485.5	160
WBGene00006616	trp-4	Y71A12B.4.1	chrI	+	13898457	13899156	-194	-175	-184.5	1.38986e+07	204	13901058	13901474	13901266	-2624.5	2624.5	161
WBGene00006616	trp-4	Y71A12B.4.1	chrI	+	13898457	13899156	-274	-257	-265.5	1.38987e+07	204	13901058	13901474	13901266	-2543.5	2543.5	162
WBGene00000241	bbs-1	Y105E8A.5.1	chrI	-	14376705	14376006	-146	-129	-137.5	1.43766e+07	218	14375903	14376319	14376111	456.5	456.5	163
WBGene00000241	bbs-1	Y105E8A.5.1	chrI	-	14376705	14376006	-102	-83	-92.5	1.43766e+07	218	14375903	14376319	14376111	501.5	501.5	164
WBGene00000188	arl-3	F19H8.3.1	chrII	+	14606437	14607136	-154	-135	-144.5	1.46066e+07	1058	14606889	14607009	14606949	-367.5	367.5	165
WBGene00000188	arl-3	F19H8.3.1	chrII	+	14606437	14607136	-302	-285	-293.5	1.46067e+07	1058	14606889	14607009	14606949	-218.5	218.5	166
WBGene00008144	gasr-8	C47E8.6.1	chrV	+	14688439	14689138	-112	-93	-102.5	1.46885e+07	3429	14688851	14689267	14689059	-517.5	517.5	167
WBGene00043308	tmem-107	F39B2.9.1	chrI	-	14759936	14759237	-262	-249	-255.5	1.47597e+07	229	14759405	14759621	14759513	167.5	167.5	168
WBGene00043308	tmem-107	F39B2.9.1	chrI	-	14759936	14759237	-71	-52	-61.5	1.47599e+07	229	14759405	14759621	14759513	361.5	361.5	169
WBGene00006960	xbx-1	F02D8.3.1	chrV	+	14979637	14980336	-82	-63	-72.5	1.49797e+07	3444	14980063	14980479	14980271	-561.5	561.5	170
WBGene00004035	pkd-2	Y73F8A.1.1	chrIV	-	15235641	15234942	-234	-217	-225.5	1.52354e+07	2611	15259544	15259960	15259752	-24336.5	24336.5	171
WBGene00003883	osm-1	T27B1.1.1	chrX	+	16540646	16541345	-93	-70	-81.5	1.65407e+07	4446	16541079	16541495	16541287	-559.5	559.5	172
WBGene00001550	gcy-27	C06A12.4a.1	chrIV	-	17437294	17436595	-80	-61	-70.5	1.74372e+07	2679	17426964	17427380	17427172	10051.5	10051.5	173
WBGene00001550	gcy-27	C06A12.4b.1	chrIV	-	17437294	17436595	-80	-61	-70.5	1.74372e+07	2679	17426964	17427380	17427172	10051.5	10051.5	173
WBGene00044771	tmem-218	T23E7.5.1	chrX	+	17649402	17650101	-121	-102	-111.5	1.76495e+07	4513	17649811	17650227	17650019	-505.5	505.5	174
WBGene00012673	dyf-17	Y39B6A.11.1	chrV	+	19126801	19127500	-274	-255	-264.5	1.91271e+07	3541	19125759	19126175	19125967	1098.5	1098.5	175
WBGene00012826	dyf-19	Y43F8C.4.1	chrV	+	19624332	19625031	-385	-366	-375.5	1.96247e+07	3563	19624266	19624682	19624474	233.5	233.5	176
WBGene00001547	gcy-22	T03D8.5a.1	chrV	-	20825697	20824998	-474	-457	-465.5	2.08252e+07	3607	20828887	20829072	2.0829e+07	-3748	3748	177
WBGene00001547	gcy-22	T03D8.5b.1	chrV	-	20825697	20824998	-474	-457	-465.5	2.08252e+07	3607	20828887	20829072	2.0829e+07	-3748	3748	177
WBGene00001547	gcy-22	T03D8.5c.1	chrV	-	20825697	20824998	-474	-457	-465.5	2.08252e+07	3607	20828887	20829072	2.0829e+07	-3748	3748	177

## Sheet: F2 G + F2FS2 B C
From	To	Unique X-box Regions	CORE	EXPRESSION	MALE	SUBTYPE
0	100	14	12	2	0	0			CORE	EXPRESSION	MALE	SUBTYPE
101	200	7	6	0	0	1		Genes	62	10	5	25	102
201	300	11	9	1	0	1		X-box regions	103	16	13	45	177
301	400	13	12	0	0	1
401	500	10	8	1	0	1
501	600	20	18	2	0	0
601	700	2	1	0	1	0
701	800	1	1	0	0	0
801	900	3	1	0	0	2
901	1000	1	0	0	0	1
1001	1100	3	1	1	0	1
1101	1200	2	2	0	0	0
1201	1300	1	1	0	0	0
1301	1400	0	0	0	0	0
1401	1500	1	1	0	0	0
1501	1600	0	0	0	0	0
1601	1700	0	0	0	0	0
1701	1800	0	0	0	0	0
1801	1900	0	0	0	0	0
1901	2000	0	0	0	0	0
2001	2100	0	0	0	0	0
2101	2200	2	1	0	1	0
2201	2300	1	0	0	0	1
2301	2400	1	0	0	1	0
2401	2500	1	0	0	1	0
2501	2600	1	0	0	0	1
2601	2700	1	0	0	0	1
2701	2800	0	0	0	0	0
2801	2900	0	0	0	0	0
2901	3000	0	0	0	0	0
3001	3100	0	0	0	0	0
3101	3200	0	0	0	0	0
3201	3300	0	0	0	0	0
3301	3400	1	1	0	0	0
3401	3500	0	0	0	0	0
3501	3600	0	0	0	0	0
3601	3700	1	0	0	0	1
3701	3800	1	0	0	0	1
3801	3900	0	0	0	0	0
3901	4000	2	0	0	2	0
4001	4100	3	0	0	2	1
4101	4200	1	0	0	0	1
4201	4300	0	0	0	0	0
4301	4400	0	0	0	0	0
4401	4500	0	0	0	0	0
4501	4600	0	0	0	0	0
4601	4700	0	0	0	0	0
4701	4800	0	0	0	0	0
4801	4900	1	1	0	0	0
4901	5000	1	0	0	0	1
5001	5100	0	0	0	0	0
5101	5200	1	0	0	0	1
5201	5300	2	0	1	0	1
5301	5400	1	0	0	0	1
5401	5500	1	1	0	0	0
5501	5600	0	0	0	0	0
5601	5700	0	0	0	0	0
5701	5800	0	0	0	0	0
5801	5900	1	1	0	0	0
5901	6000	0	0	0	0	0
6001	6100	0	0	0	0	0
6101	6200	0	0	0	0	0
6201	6300	1	0	0	0	1
6301	6400	0	0	0	0	0
6401	6500	0	0	0	0	0
6501	6600	0	0	0	0	0
6601	6700	0	0	0	0	0
6701	6800	0	0	0	0	0
6801	6900	1	0	1	0	0
6901	7000	0	0	0	0	0
7001	7100	1	0	1	0	0
7101	7200	1	1	0	0	0
7201	7300	0	0	0	0	0
7301	7400	1	1	0	0	0
7401	7500	0	0	0	0	0
7501	7600	1	1	0	0	0
7601	7700	0	0	0	0	0
7701	7800	2	2	0	0	0
7801	7900	0	0	0	0	0
7901	8000	0	0	0	0	0
8001	8100	1	0	1	0	0
8101	8200	0	0	0	0	0
8201	8300	1	1	0	0	0
8301	8400	1	1	0	0	0
8401	8500	0	0	0	0	0
8501	8600	0	0	0	0	0
8601	8700	2	0	0	0	2
8701	8800	1	0	0	0	1
8801	8900	0	0	0	0	0
8901	9000	0	0	0	0	0
9001	9100	0	0	0	0	0
9101	9200	1	0	0	0	1
9201	9300	0	0	0	0	0
9301	9400	0	0	0	0	0
9401	9500	0	0	0	0	0
9501	9600	0	0	0	0	0
9601	9700	0	0	0	0	0
9701	9800	1	1	0	0	0
9801	9900	0	0	0	0	0
9901	10000	1	1	0	0	0
10001	10100	1	0	0	0	1
10101	10200	1	1	0	0	0
10201	10300	0	0	0	0	0
10301	10400	0	0	0	0	0
10401	10500	1	1	0	0	0
10501	10600	0	0	0	0	0
10601	10700	3	0	2	1	0
10701	10800	0	0	0	0	0
10801	10900	1	0	1	0	0
10901	11000	0	0	0	0	0
11001	11100	0	0	0	0	0
11101	11200	0	0	0	0	0
11201	11300	0	0	0	0	0
11301	11400	0	0	0	0	0
11401	11500	0	0	0	0	0
11501	11600	0	0	0	0	0
11601	11700	0	0	0	0	0
11701	11800	0	0	0	0	0
11801	11900	0	0	0	0	0
11901	12000	0	0	0	0	0
12001	12100	0	0	0	0	0
12101	12200	1	0	0	0	1
12201	12300	0	0	0	0	0
12301	12400	1	0	0	0	1
12401	12500	0	0	0	0	0
12501	12600	0	0	0	0	0
12601	12700	0	0	0	0	0
12701	12800	0	0	0	0	0
12801	12900	2	0	0	0	2
12901	13000	0	0	0	0	0
13001	13100	0	0	0	0	0
13101	13200	0	0	0	0	0
13201	13300	0	0	0	0	0
13301	13400	1	1	0	0	0
13401	13500	1	0	0	0	1
13501	13600	1	1	0	0	0
13601	13700	1	1	0	0	0
13701	13800	0	0	0	0	0
13801	13900	0	0	0	0	0
13901	14000	1	0	0	0	1
14001	14100	1	0	0	0	1
14101	14200	2	0	0	0	2
14201	14300	0	0	0	0	0
14301	14400	0	0	0	0	0
14401	14500	0	0	0	0	0
14501	14600	0	0	0	0	0
14601	14700	0	0	0	0	0
14701	14800	0	0	0	0	0
14801	14900	1	0	1	0	0
14901	15000	0	0	0	0	0
15001	15100	0	0	0	0	0
15101	15200	0	0	0	0	0
15201	15300	0	0	0	0	0
15301	15400	0	0	0	0	0
15401	15500	0	0	0	0	0
15501	15600	0	0	0	0	0
15601	15700	0	0	0	0	0
15701	15800	0	0	0	0	0
15801	15900	0	0	0	0	0
15901	16000	0	0	0	0	0
16001	16100	0	0	0	0	0
16101	16200	0	0	0	0	0
16201	16300	0	0	0	0	0
16301	16400	0	0	0	0	0
16401	16500	0	0	0	0	0
16501	16600	0	0	0	0	0
16601	16700	0	0	0	0	0
16701	16800	0	0	0	0	0
16801	16900	0	0	0	0	0
16901	17000	0	0	0	0	0
17001	17100	0	0	0	0	0
17101	17200	0	0	0	0	0
17201	17300	0	0	0	0	0
17301	17400	0	0	0	0	0
17401	17500	0	0	0	0	0
17501	17600	0	0	0	0	0
17601	17700	0	0	0	0	0
17701	17800	0	0	0	0	0
17801	17900	0	0	0	0	0
17901	18000	0	0	0	0	0
18001	18100	0	0	0	0	0
18101	18200	0	0	0	0	0
18201	18300	0	0	0	0	0
18301	18400	0	0	0	0	0
18401	18500	0	0	0	0	0
18501	18600	0	0	0	0	0
18601	18700	1	1	0	0	0
18701	18800	0	0	0	0	0
18801	18900	0	0	0	0	0
18901	19000	0	0	0	0	0
19001	19100	0	0	0	0	0
19101	19200	0	0	0	0	0
19201	19300	0	0	0	0	0
19301	19400	0	0	0	0	0
19401	19500	0	0	0	0	0
19501	19600	0	0	0	0	0
19601	19700	0	0	0	0	0
19701	19800	0	0	0	0	0
19801	19900	0	0	0	0	0
19901	20000	0	0	0	0	0
20001	20100	0	0	0	0	0
20101	20200	0	0	0	0	0
20201	20300	0	0	0	0	0
20301	20400	0	0	0	0	0
20401	20500	0	0	0	0	0
20501	20600	0	0	0	0	0
20601	20700	0	0	0	0	0
20701	20800	0	0	0	0	0
20801	20900	1	1	0	0	0
20901	21000	1	1	0	0	0
21001	21100	0	0	0	0	0
21101	21200	0	0	0	0	0
21201	21300	0	0	0	0	0
21301	21400	0	0	0	0	0
21401	21500	0	0	0	0	0
21501	21600	0	0	0	0	0
21601	21700	0	0	0	0	0
21701	21800	0	0	0	0	0
21801	21900	1	0	0	1	0
21901	22000	1	0	0	1	0
22001	22100	1	0	0	1	0
22101	22200	1	1	0	0	0
22201	22300	0	0	0	0	0
22301	22400	1	0	0	1	0
22401	22500	0	0	0	0	0
22501	22600	0	0	0	0	0
22601	22700	0	0	0	0	0
22701	22800	0	0	0	0	0
22801	22900	0	0	0	0	0
22901	23000	1	1	0	0	0
23001	23100	0	0	0	0	0
23101	23200	0	0	0	0	0
23201	23300	0	0	0	0	0
23301	23400	0	0	0	0	0
23401	23500	0	0	0	0	0
23501	23600	0	0	0	0	0
23601	23700	0	0	0	0	0
23701	23800	0	0	0	0	0
23801	23900	0	0	0	0	0
23901	24000	0	0	0	0	0
24001	24100	0	0	0	0	0
24101	24200	0	0	0	0	0
24201	24300	0	0	0	0	0
24301	24400	1	0	0	0	1
24401	24500	0	0	0	0	0
24501	24600	0	0	0	0	0
24601	24700	0	0	0	0	0
24701	24800	0	0	0	0	0
24801	24900	0	0	0	0	0
24901	25000	1	0	0	0	1
25001	25100	0	0	0	0	0
25101	25200	0	0	0	0	0
25201	25300	0	0	0	0	0
25301	25400	0	0	0	0	0
25401	25500	0	0	0	0	0
25501	25600	0	0	0	0	0
25601	25700	0	0	0	0	0
25701	25800	0	0	0	0	0
25801	25900	1	0	0	0	1
25901	26000	1	0	0	0	1
26001	26100	0	0	0	0	0
26101	26200	0	0	0	0	0
26201	26300	0	0	0	0	0
26301	26400	0	0	0	0	0
26401	26500	0	0	0	0	0
26501	26600	0	0	0	0	0
26601	26700	0	0	0	0	0
26701	26800	0	0	0	0	0
26801	26900	0	0	0	0	0
26901	27000	0	0	0	0	0
27001	27100	0	0	0	0	0
27101	27200	0	0	0	0	0
27201	27300	0	0	0	0	0
27301	27400	0	0	0	0	0
27401	27500	0	0	0	0	0
27501	27600	1	0	0	0	1
27601	27700	0	0	0	0	0
27701	27800	0	0	0	0	0
27801	27900	0	0	0	0	0
27901	28000	0	0	0	0	0
28001	28100	0	0	0	0	0
28101	28200	0	0	0	0	0
28201	28300	0	0	0	0	0
28301	28400	0	0	0	0	0
28401	28500	0	0	0	0	0
28501	28600	0	0	0	0	0
28601	28700	0	0	0	0	0
28701	28800	0	0	0	0	0
28801	28900	0	0	0	0	0
28901	29000	1	0	0	0	1
29001	29100	0	0	0	0	0
29101	29200	0	0	0	0	0
29201	29300	0	0	0	0	0
29301	29400	0	0	0	0	0
29401	29500	1	0	0	0	1
29501	29600	1	0	0	0	1
29601	29700	1	0	0	0	1
29701	29800	0	0	0	0	0
29801	29900	0	0	0	0	0
29901	30000	0	0	0	0	0
30001	30100	0	0	0	0	0
30101	30200	0	0	0	0	0
30201	30300	0	0	0	0	0
30301	30400	0	0	0	0	0
30401	30500	0	0	0	0	0
30501	30600	0	0	0	0	0
30601	30700	0	0	0	0	0
30701	30800	0	0	0	0	0
30801	30900	0	0	0	0	0
30901	31000	1	1	0	0	0
31001	31100	0	0	0	0	0
31101	31200	0	0	0	0	0
31201	31300	0	0	0	0	0
31301	31400	0	0	0	0	0
31401	31500	0	0	0	0	0
31501	31600	0	0	0	0	0
31601	31700	0	0	0	0	0
31701	31800	0	0	0	0	0
31801	31900	0	0	0	0	0
31901	32000	0	0	0	0	0
32001	32100	0	0	0	0	0
32101	32200	0	0	0	0	0
32201	32300	0	0	0	0	0
32301	32400	0	0	0	0	0
32401	32500	0	0	0	0	0
32501	32600	0	0	0	0	0
32601	32700	0	0	0	0	0
32701	32800	0	0	0	0	0
32801	32900	0	0	0	0	0
32901	33000	0	0	0	0	0
33001	33100	0	0	0	0	0
33101	33200	0	0	0	0	0
33201	33300	0	0	0	0	0
33301	33400	0	0	0	0	0
33401	33500	0	0	0	0	0
33501	33600	0	0	0	0	0
33601	33700	0	0	0	0	0
33701	33800	0	0	0	0	0
33801	33900	1	1	0	0	0
33901	34000	0	0	0	0	0
34001	34100	0	0	0	0	0
34101	34200	0	0	0	0	0
34201	34300	0	0	0	0	0
34301	34400	0	0	0	0	0
34401	34500	1	1	0	0	0
34501	34600	0	0	0	0	0
34601	34700	0	0	0	0	0
34701	34800	0	0	0	0	0
34801	34900	0	0	0	0	0
34901	35000	0	0	0	0	0
35001	35100	1	0	1	0	0
35101	35200	0	0	0	0	0
35201	35300	0	0	0	0	0
35301	35400	0	0	0	0	0
35401	35500	0	0	0	0	0
35501	35600	0	0	0	0	0
35601	35700	0	0	0	0	0
35701	35800	0	0	0	0	0
35801	35900	0	0	0	0	0
35901	36000	0	0	0	0	0
36001	36100	0	0	0	0	0
36101	36200	0	0	0	0	0
36201	36300	0	0	0	0	0
36301	36400	0	0	0	0	0
36401	36500	0	0	0	0	0
36501	36600	0	0	0	0	0
36601	36700	0	0	0	0	0
36701	36800	0	0	0	0	0
36801	36900	0	0	0	0	0
36901	37000	1	0	0	0	1
37001	37100	0	0	0	0	0
37101	37200	0	0	0	0	0
37201	37300	0	0	0	0	0
37301	37400	0	0	0	0	0
37401	37500	0	0	0	0	0
37501	37600	0	0	0	0	0
37601	37700	0	0	0	0	0
37701	37800	0	0	0	0	0
37801	37900	0	0	0	0	0
37901	38000	0	0	0	0	0
38001	38100	0	0	0	0	0
38101	38200	0	0	0	0	0
38201	38300	0	0	0	0	0
38301	38400	0	0	0	0	0
38401	38500	0	0	0	0	0
38501	38600	0	0	0	0	0
38601	38700	0	0	0	0	0
38701	38800	0	0	0	0	0
38801	38900	0	0	0	0	0
38901	39000	0	0	0	0	0
39001	39100	0	0	0	0	0
39101	39200	0	0	0	0	0
39201	39300	0	0	0	0	0
39301	39400	0	0	0	0	0
39401	39500	0	0	0	0	0
39501	39600	0	0	0	0	0
39601	39700	0	0	0	0	0
39701	39800	0	0	0	0	0
39801	39900	1	1	0	0	0
39901	40000	0	0	0	0	0
40001	40100	1	0	0	0	1
40101	40200	1	1	0	0	0
40201	40300	0	0	0	0	0
40301	40400	0	0	0	0	0
40401	40500	0	0	0	0	0
40501	40600	0	0	0	0	0
40601	40700	0	0	0	0	0
40701	40800	0	0	0	0	0
40801	40900	0	0	0	0	0
40901	41000	0	0	0	0	0
41001	41100	0	0	0	0	0
41101	41200	0	0	0	0	0
41201	41300	0	0	0	0	0
41301	41400	0	0	0	0	0
41401	41500	0	0	0	0	0
41501	41600	0	0	0	0	0
41601	41700	0	0	0	0	0
41701	41800	0	0	0	0	0
41801	41900	0	0	0	0	0
41901	42000	1	1	0	0	0
	CONTROL	177	103	16	13	45	177

## Sheet: F2FS1 E
fkh-8				daf-19				hlh-14
Gene	Type	Correlation Index		Gene	Type	Correlation Index		Gene	Type	Correlation Index
egl-3	Panneural	0.0573294		egl-3	Panneural	0.0555877		egl-3	Panneural	-0.0527719
snn-1	Panneural	-0.00147844		snn-1	Panneural	9.29193e-05		snn-1	Panneural	-0.0271041
rab-3	Panneural	0.0268789		rab-3	Panneural	0.0417587		rab-3	Panneural	-0.0573808
sng-1	Panneural	0.106987		sng-1	Panneural	0.035654		sng-1	Panneural	-0.0541243
ric-4	Panneural	0.094221		ric-4	Panneural	0.054593		ric-4	Panneural	-0.0847772
unc-104	Panneural	0.0559335		unc-104	Panneural	0.0692472		unc-104	Panneural	-0.0705148
unc-108	Panneural	0.121087		unc-108	Panneural	0.0594157		unc-108	Panneural	0.068127
snt-1	Panneural	0.0603889		snt-1	Panneural	-0.0133113		snt-1	Panneural	-0.0525556
unc-18	Panneural	0.067187		unc-18	Panneural	0.0523113		unc-18	Panneural	-0.019695
snb-1	Panneural	0.095864		snb-1	Panneural	0.078778		snb-1	Panneural	-0.00439183
ehs-1	Panneural	0.058054		ehs-1	Panneural	0.0550144		ehs-1	Panneural	-0.00601502
ric-19	Panneural	0.162128		ric-19	Panneural	0.207412		ric-19	Panneural	-0.0827611
egl-21	Panneural	0.128932		egl-21	Panneural	0.102311		egl-21	Panneural	-0.110127
unc-10	Panneural	0.0212982		unc-10	Panneural	0.0443396		unc-10	Panneural	-0.0372463
ama-1	Ubiquitous	-0.0116331		ama-1	Ubiquitous	-0.0307191		ama-1	Ubiquitous	0.140747
cec-1	Ubiquitous	0.0835698		cec-1	Ubiquitous	0.0835544		cec-1	Ubiquitous	0.160111
cdc-42	Ubiquitous	0.0147971		cdc-42	Ubiquitous	6.71029e-05		cdc-42	Ubiquitous	0.118534
pmp-3	Ubiquitous	0.0500154		pmp-3	Ubiquitous	0.0935606		pmp-3	Ubiquitous	0.088206
rme-1	Ubiquitous	0.0444731		rme-1	Ubiquitous	0.0314316		rme-1	Ubiquitous	0.0329314
dpy-30	Ubiquitous	0.0529574		dpy-30	Ubiquitous	0.0278394		dpy-30	Ubiquitous	0.138689
eif-6	Ubiquitous	-0.010498		eif-6	Ubiquitous	-0.0313012		eif-6	Ubiquitous	0.102175
arl-13	Core	0.235701		arl-13	Core	0.243918		arl-13	Core	-0.0927772
bbs-1	Core	0.225833		bbs-1	Core	0.256825		bbs-1	Core	-0.0701945
bbs-2	Core	0.240507		bbs-2	Core	0.297382		bbs-2	Core	-0.0848042
bbs-4	Core	0.226995		bbs-4	Core	0.293478		bbs-4	Core	-0.090167
bbs-5	Core	0.25644		bbs-5	Core	0.245237		bbs-5	Core	-0.108796
bbs-8	Core	0.207702		bbs-8	Core	0.210172		bbs-8	Core	-0.12548
bbs-9	Core	0.249339		bbs-9	Core	0.351295		bbs-9	Core	-0.051709
ccep-290	Core	0.230251		ccep-290	Core	0.328324		ccep-290	Core	-0.0674955
cfap-36	Core	0.0489678		cfap-36	Core	0.0238613		cfap-36	Core	-0.0492742
che-10	Core	0.165741		che-10	Core	0.204808		che-10	Core	0.0122985
che-11	Core	0.182618		che-11	Core	0.188637		che-11	Core	-0.0762473
che-12	Core	0.0499943		che-12	Core	0.0913798		che-12	Core	-0.0661124
che-13	Core	0.286643		che-13	Core	0.344176		che-13	Core	-0.0827947
che-2	Core	0.175527		che-2	Core	0.188047		che-2	Core	-0.0390502
che-3	Core	0.119013		che-3	Core	0.112378		che-3	Core	-0.0756687
clic-1	Core	0.0981839		clic-1	Core	0.0696912		clic-1	Core	0.119189
daf-10	Core	0.260164		daf-10	Core	0.345998		daf-10	Core	-0.0259347
dli-1	Core	0.12453		dli-1	Core	0.150736		dli-1	Core	0.10595
dyci-1	Core	0.00256309		dyci-1	Core	0.0012905		dyci-1	Core	0.0627935
dyf-1	Core	0.2296		dyf-1	Core	0.311054		dyf-1	Core	-0.0914794
dyf-11	Core	0.134337		dyf-11	Core	0.171606		dyf-11	Core	-0.0144543
dyf-13	Core	0.231112		dyf-13	Core	0.23784		dyf-13	Core	-0.0927634
dyf-19	Core	0.163384		dyf-19	Core	0.0878183		dyf-19	Core	-0.0878672
dyf-2	Core	0.183736		dyf-2	Core	0.238038		dyf-2	Core	-0.0148776
dyf-3	Core	0.296614		dyf-3	Core	0.286783		dyf-3	Core	-0.0990742
dyf-5	Core	0.15931		dyf-5	Core	0.233198		dyf-5	Core	-0.0407668
dyf-6	Core	0.0985433		dyf-6	Core	0.111315		dyf-6	Core	-0.100667
dyf-7	Core	0.172558		dyf-7	Core	0.299633		dyf-7	Core	0.0880676
dylt-2	Core	0.252916		dylt-2	Core	0.241719		dylt-2	Core	-0.131911
peli-1	Core	0.0240805		peli-1	Core	0.0401174		peli-1	Core	0.0368329
hyls-1	Core	-0.0255157		hyls-1	Core	-0.0370023		hyls-1	Core	0.1446
ift-20	Core	0.302645		ift-20	Core	0.352743		ift-20	Core	-0.0814006
ift-74	Core	0.247918		ift-74	Core	0.262118		ift-74	Core	-0.103013
ift-81	Core	0.265455		ift-81	Core	0.355639		ift-81	Core	-0.0840404
ifta-1	Core	0.251857		ifta-1	Core	0.297375		ifta-1	Core	-0.0353368
ifta-2	Core	0.283834		ifta-2	Core	0.268817		ifta-2	Core	-0.125339
jbts-14	Core	0.272651		jbts-14	Core	0.394769		jbts-14	Core	-0.00418525
kap-1	Core	0.16277		kap-1	Core	0.205207		kap-1	Core	0.0173351
klp-11	Core	0.0942522		klp-11	Core	0.109939		klp-11	Core	0.030556
klp-20	Core	0.0676777		klp-20	Core	0.0637406		klp-20	Core	-4.69443e-05
mks-1	Core	0.278081		mks-1	Core	0.315029		mks-1	Core	-0.0862417
mks-2	Core	0.266077		mks-2	Core	0.247981		mks-2	Core	-0.143113
mks-3	Core	0.227699		mks-3	Core	0.268367		mks-3	Core	-0.0612106
mks-5	Core	0.243625		mks-5	Core	0.283927		mks-5	Core	-0.00154638
mks-6	Core	0.227866		mks-6	Core	0.321402		mks-6	Core	-0.0502951
mksr-1	Core	0.258425		mksr-1	Core	0.244435		mksr-1	Core	-0.0379566
mksr-2	Core	0.319736		mksr-2	Core	0.316166		mksr-2	Core	-0.119416
nphp-1	Core	0.333011		nphp-1	Core	0.414335		nphp-1	Core	0.0112861
nphp-2	Core	0.005171		nphp-2	Core	0.0439603		nphp-2	Core	-0.0467419
nphp-4	Core	0.202678		nphp-4	Core	0.293349		nphp-4	Core	-0.0104019
nubp-1	Core	-0.00573535		nubp-1	Core	-0.0130983		nubp-1	Core	0.0800981
rbg-3	Core	0.0329343		rbg-3	Core	0.0318979		rbg-3	Core	0.0427271
osm-1	Core	0.139566		osm-1	Core	0.188671		osm-1	Core	-0.0609854
osm-12	Core	0.227433		osm-12	Core	0.274107		osm-12	Core	-0.0602461
osm-3	Core	0.0165701		osm-3	Core	-0.0126043		osm-3	Core	-0.041211
osm-5	Core	0.259601		osm-5	Core	0.323168		osm-5	Core	-0.0648532
osm-6	Core	0.234603		osm-6	Core	0.326139		osm-6	Core	-0.0662817
arl-3	Core	0.274621		arl-3	Core	0.2834		arl-3	Core	-0.14645
arl-6	Core	0.0776446		arl-6	Core	0.0931679		arl-6	Core	-0.00123205
rab-8	Core	0.0240315		rab-8	Core	-0.0117843		rab-8	Core	0.102125
rpi-2	Core	0.0842001		rpi-2	Core	0.0975628		rpi-2	Core	-0.0246618
osta-1	Core	0.0711386		osta-1	Core	0.0448865		osta-1	Core	-0.0345639
tba-5	Core	0.0444937		tba-5	Core	0.0042309		tba-5	Core	-0.0381879
tba-6	Core	0.0104787		tba-6	Core	0.16209		tba-6	Core	-0.0507306
tbb-4	Core	0.110762		tbb-4	Core	0.0515813		tbb-4	Core	0.0498544
tmem-107	Core	0.223575		tmem-107	Core	0.258798		tmem-107	Core	-0.0775819
tmem-138	Core	0.143347		tmem-138	Core	0.102901		tmem-138	Core	-0.0387247
tmem-17	Core	0.265005		tmem-17	Core	0.296563		tmem-17	Core	-0.0645364
tmem-218	Core	0.192665		tmem-218	Core	0.185143		tmem-218	Core	-0.0993577
tmem-231	Core	0.312022		tmem-231	Core	0.398069		tmem-231	Core	-0.0829392
tub-1	Core	0.111974		tub-1	Core	0.080791		tub-1	Core	-0.0377289
xbx-1	Core	0.151302		xbx-1	Core	0.148373		xbx-1	Core	-0.0958826
aqp-6	Subtype-specific	-0.0282207		aqp-6	Subtype-specific	-0.0566948		aqp-6	Subtype-specific	0.053126
daf-11	Subtype-specific	-0.00870502		daf-11	Subtype-specific	0.0640712		daf-11	Subtype-specific	-0.0346316
gpa-13	Subtype-specific	0.0378131		gpa-13	Subtype-specific	0.0218173		gpa-13	Subtype-specific	-0.0281903
asic-1	Subtype-specific	-0.00487088		asic-1	Subtype-specific	-0.0117854		asic-1	Subtype-specific	-0.00345975
asic-2	Subtype-specific	-0.001458		asic-2	Subtype-specific	0.0128406		asic-2	Subtype-specific	-0.00316928
clhm-1	Subtype-specific	0.112048		clhm-1	Subtype-specific	0.10824		clhm-1	Subtype-specific	-0.0729494
cng-3	Subtype-specific	0.0383325		cng-3	Subtype-specific	0.0841112		cng-3	Subtype-specific	-0.0145417
gpa-3	Subtype-specific	0.0539736		gpa-3	Subtype-specific	-0.00579912		gpa-3	Subtype-specific	-0.0306688
pef-1	Subtype-specific	-0.00329578		pef-1	Subtype-specific	0.0434112		pef-1	Subtype-specific	-0.0326961
daf-37	Subtype-specific	-0.00735707		daf-37	Subtype-specific	-0.0031273		daf-37	Subtype-specific	-0.0157266
dcar-1	Subtype-specific	0.00172623		dcar-1	Subtype-specific	-0.0135597		dcar-1	Subtype-specific	0.0648665
gar-2	Subtype-specific	0.00971235		gar-2	Subtype-specific	-0.0112683		gar-2	Subtype-specific	-0.0263722
gcy-12	Subtype-specific	0.0022942		gcy-12	Subtype-specific	0.0132063		gcy-12	Subtype-specific	-0.0136137
gcy-14	Subtype-specific	-0.000747625		gcy-14	Subtype-specific	0.0329566		gcy-14	Subtype-specific	-0.00934605
gcy-15	Subtype-specific	0.0194351		gcy-15	Subtype-specific	0.00115408		gcy-15	Subtype-specific	0.0059929
gcy-18	Subtype-specific	-0.0071326		gcy-18	Subtype-specific	0.150855		gcy-18	Subtype-specific	-0.0335529
gcy-19	Subtype-specific	0.0282152		gcy-19	Subtype-specific	0.0663665		gcy-19	Subtype-specific	-0.0125386
gcy-20	Subtype-specific	0.00477799		gcy-20	Subtype-specific	0.00643369		gcy-20	Subtype-specific	0.00771861
gcy-21	Subtype-specific	-0.00379969		gcy-21	Subtype-specific	-0.00066681		gcy-21	Subtype-specific	0.0217983
gcy-22	Subtype-specific	0.0241945		gcy-22	Subtype-specific	0.0596046		gcy-22	Subtype-specific	-0.00963943
gcy-23	Subtype-specific	-0.0130874		gcy-23	Subtype-specific	0.159144		gcy-23	Subtype-specific	-0.0329076
gcy-27	Subtype-specific	0.00511344		gcy-27	Subtype-specific	-0.015127		gcy-27	Subtype-specific	-0.0109603
gcy-29	Subtype-specific	-0.0136925		gcy-29	Subtype-specific	0.148988		gcy-29	Subtype-specific	-0.0272683
gcy-31	Subtype-specific	-0.0157888		gcy-31	Subtype-specific	-0.00628233		gcy-31	Subtype-specific	-0.0279778
gcy-33	Subtype-specific	-0.00919657		gcy-33	Subtype-specific	0.0231168		gcy-33	Subtype-specific	-0.0453104
gcy-4	Subtype-specific	0.00509396		gcy-4	Subtype-specific	-0.00610092		gcy-4	Subtype-specific	-0.0145604
gcy-5	Subtype-specific	0.0143671		gcy-5	Subtype-specific	0.0434591		gcy-5	Subtype-specific	-0.00932859
gcy-6	Subtype-specific	0.00923532		gcy-6	Subtype-specific	0.0723545		gcy-6	Subtype-specific	-0.00482837
gcy-7	Subtype-specific	0.00800126		gcy-7	Subtype-specific	-0.00767776		gcy-7	Subtype-specific	-0.0040002
gcy-8	Subtype-specific	-0.0135612		gcy-8	Subtype-specific	0.18784		gcy-8	Subtype-specific	-0.0309851
gcy-9	Subtype-specific	-0.0124525		gcy-9	Subtype-specific	-0.00282501		gcy-9	Subtype-specific	-0.03201
pitp-1	Subtype-specific	0.0724564		pitp-1	Subtype-specific	0.0698968		pitp-1	Subtype-specific	-0.0270485
nsy-4	Subtype-specific	0.045718		nsy-4	Subtype-specific	0.0539442		nsy-4	Subtype-specific	0.0687244
ocr-1	Subtype-specific	0.0127427		ocr-1	Subtype-specific	0.00236144		ocr-1	Subtype-specific	-0.0135781
ocr-2	Subtype-specific	0.0360868		ocr-2	Subtype-specific	0.0131909		ocr-2	Subtype-specific	-0.0341659
ocr-4	Subtype-specific	-0.0106102		ocr-4	Subtype-specific	-0.00261307		ocr-4	Subtype-specific	-0.0300589
odr-1	Subtype-specific	-0.00266501		odr-1	Subtype-specific	0.0695258		odr-1	Subtype-specific	-0.0394306
odr-3	Subtype-specific	0.0448541		odr-3	Subtype-specific	0.0220361		odr-3	Subtype-specific	-0.0563061
osm-9	Subtype-specific	0.00165977		osm-9	Subtype-specific	0.000254205		osm-9	Subtype-specific	-0.0186961
odr-4	Subtype-specific	0.152076		odr-4	Subtype-specific	0.0954975		odr-4	Subtype-specific	-0.0948232
pkd-2	Subtype-specific	-0.00458714		pkd-2	Subtype-specific	-0.00606963		pkd-2	Subtype-specific	-0.00316235
odr-8	Subtype-specific	0.0863419		odr-8	Subtype-specific	0.0375757		odr-8	Subtype-specific	0.0319972
srab-16	Subtype-specific	0.0149829		srab-16	Subtype-specific	0.027401		srab-16	Subtype-specific	-0.0147719
srbc-64	Subtype-specific	-0.00458714		srbc-64	Subtype-specific	-0.00606963		srbc-64	Subtype-specific	5.88942e-05
srd-23	Subtype-specific	0.0190884		srd-23	Subtype-specific	0.00563832		srd-23	Subtype-specific	-0.0175479
srg-2	Subtype-specific	-0.000871857		srg-2	Subtype-specific	-0.0157921		srg-2	Subtype-specific	-0.012412
srsx-3	Subtype-specific	0.00071353		srsx-3	Subtype-specific	-1.92816e-05		srsx-3	Subtype-specific	-0.00858389
sru-38	Subtype-specific	0.00140393		sru-38	Subtype-specific	0.0135496		sru-38	Subtype-specific	-0.0144318
str-1	Subtype-specific	-0.0102591		str-1	Subtype-specific	0.0108311		str-1	Subtype-specific	0.00445427
str-163	Subtype-specific	0.0172578		str-163	Subtype-specific	0.00130039		str-163	Subtype-specific	-0.00547786
str-2	Subtype-specific	-0.00794589		str-2	Subtype-specific	0.00130039		str-2	Subtype-specific	-0.00547786
sulp-2	Subtype-specific	-0.0124513		sulp-2	Subtype-specific	0.00409476		sulp-2	Subtype-specific	-0.00275472
tax-2	Subtype-specific	0.000298939		tax-2	Subtype-specific	0.0652188		tax-2	Subtype-specific	-0.0448139
tax-4	Subtype-specific	0.00524374		tax-4	Subtype-specific	0.0547087		tax-4	Subtype-specific	-0.0376636
tmc-1	Subtype-specific	-0.0133752		tmc-1	Subtype-specific	-0.0118767		tmc-1	Subtype-specific	-0.024171
tram-1	Subtype-specific	0.0763439		tram-1	Subtype-specific	0.0346433		tram-1	Subtype-specific	0.0388369
trp-4	Subtype-specific	-0.0108459		trp-4	Subtype-specific	-0.0131236		trp-4	Subtype-specific	-0.0138476
trpa-1	Subtype-specific	0.112603		trpa-1	Subtype-specific	0.103688		trpa-1	Subtype-specific	0.0394353

## Sheet: F2FS2 A
TF	Stage	ENCODE ID	# Peaks	daf-19(+)	daf-19(+) %	Centrimo p-value
fkh-2	L3	ENCFF447GPP	203	0	0
fkh-3	YA	ENCFF071WAU	40	0	0
fkh-4	L1	ENCFF383EHQ	1189	396	0.333053	6.6e-06
fkh-6	LE	ENCFF416CLW	765	271	0.354248	0.00016
fkh-8	L1	ENCFF653QKE	5035	1056	0.209732	2.7e-38
fkh-10	L1	ENCFF878LWY	2601	0	0
fkh-10	L3	ENCFF081QIY	1970	0	0
fkh-10	L4	ENCFF456ECS	2253	0	0
fkh-10	LE	ENCFF495XKO	377	0	0
pha-4	EM	ENCFF674WWP	2175	477	0.21931	1.6e-12
pha-4	L3	ENCFF731VKY	7842	2007	0.25593	2.8e-17
pha-4	L4	ENCFF680ECP	1484	424	0.285714	3.3e-05
pha-4	LE	ENCFF489OMV	9	0	0
pha-4	YA	ENCFF965ETB	839	0	0

## Sheet: F2FS2 A daf-19 (+)
fkh-2_ENCFF447GPP	fkh-3_ENCFF071WAU	fkh-4_ENCFF383EHQ	fkh-6_ENCFF416CLW	fkh-8_ENCFF653QKE	fkh-10_ENCFF878LWY	fkh-10_ENCFF081QIY	fkh-10_ENCFF456ECS	fkh-10_ENCFF495XKO	pha-4_ENCFF674WWP	pha-4_ENCFF731VKY	pha-4_ENCFF680ECP	pha-4_ENCFF489OMV	pha-4_ENCFF965ETB
		chrI:3717-4137	chrI:173733-174153	chrI:3702-4122					chrI:110545-110965	chrI:3728-4148	chrI:33649-34069
		chrI:382303-382723	chrI:1415787-1416207	chrI:382292-382712					chrI:397680-398100	chrI:33642-34062	chrI:535246-535666
		chrI:536695-537115	chrI:1559094-1559514	chrI:518423-518843					chrI:518433-518853	chrI:46982-47402	chrI:716573-716993
		chrI:1034160-1034580	chrI:1691164-1691584	chrI:871732-872152					chrI:1068254-1068674	chrI:110542-110962	chrI:1068234-1068654
		chrI:1102068-1102488	chrI:1823001-1823421	chrI:1034169-1034589					chrI:1290306-1290726	chrI:348217-348637	chrI:1361120-1361540
		chrI:1296283-1296703	chrI:1835352-1835772	chrI:1068246-1068666					chrI:1697897-1698317	chrI:381471-381891	chrI:2024519-2024939
		chrI:1415856-1416276	chrI:2299457-2299877	chrI:1277175-1277595					chrI:1835402-1835822	chrI:382297-382717	chrI:2096888-2097308
		chrI:1697817-1698237	chrI:2710498-2710918	chrI:1823079-1823499					chrI:2011143-2011563	chrI:395139-395559	chrI:2291007-2291427
		chrI:1835349-1835769	chrI:3721596-3722016	chrI:1835400-1835820					chrI:2290987-2291407	chrI:434580-435000	chrI:2306714-2307134
		chrI:2044904-2045324	chrI:3738109-3738529	chrI:1875059-1875479					chrI:2321774-2322194	chrI:518421-518841	chrI:2859728-2860148
		chrI:2096886-2097306	chrI:3873709-3874129	chrI:2024553-2024973					chrI:2401445-2401865	chrI:716564-716984	chrI:2876328-2876748
		chrI:2458597-2459017	chrI:4005488-4005908	chrI:2065422-2065842					chrI:2586104-2586524	chrI:1034174-1034594	chrI:2962025-2962445
		chrI:2639556-2639976	chrI:4132109-4132529	chrI:2312891-2313311					chrI:2639573-2639993	chrI:1049083-1049503	chrI:3501039-3501459
		chrI:2830200-2830620	chrI:4172013-4172433	chrI:2321764-2322184					chrI:2876329-2876749	chrI:1068311-1068731	chrI:3516250-3516670
		chrI:2887181-2887601	chrI:4247374-4247794	chrI:2357574-2357994					chrI:2962009-2962429	chrI:1226098-1226518	chrI:3681907-3682327
		chrI:2996193-2996613	chrI:4475042-4475462	chrI:2393363-2393783					chrI:3032698-3033118	chrI:1290316-1290736	chrI:3781617-3782037
		chrI:3032694-3033114	chrI:4584620-4585040	chrI:2401443-2401863					chrI:3162417-3162837	chrI:1298834-1299254	chrI:4200915-4201335
		chrI:3176385-3176805	chrI:5164809-5165229	chrI:2414039-2414459					chrI:3176410-3176830	chrI:1361127-1361547	chrI:4320741-4321161
		chrI:3516226-3516646	chrI:5706781-5707201	chrI:2436884-2437304					chrI:3227892-3228312	chrI:1362741-1363161	chrI:4584651-4585071
		chrI:4080335-4080755	chrI:5807287-5807707	chrI:2577252-2577672					chrI:3516234-3516654	chrI:1444003-1444423	chrI:4772927-4773347
		chrI:4171957-4172377	chrI:6136397-6136817	chrI:2639594-2640014					chrI:4420615-4421035	chrI:1548126-1548546	chrI:5164790-5165210
		chrI:4308134-4308554	chrI:6564489-6564909	chrI:2830230-2830650					chrI:4444269-4444689	chrI:1678911-1679331	chrI:5311562-5311982
		chrI:4584673-4585093	chrI:7251484-7251904	chrI:2863967-2864387					chrI:4602836-4603256	chrI:1697857-1698277	chrI:5485794-5486214
		chrI:4699174-4699594	chrI:7472245-7472665	chrI:2927966-2928386					chrI:4745240-4745660	chrI:1823072-1823492	chrI:5608811-5609231
		chrI:4890549-4890969	chrI:7500550-7500970	chrI:3032725-3033145					chrI:4789802-4790222	chrI:1835389-1835809	chrI:5698918-5699338
		chrI:4941066-4941486	chrI:7518287-7518707	chrI:3162444-3162864					chrI:4932752-4933172	chrI:1841867-1842287	chrI:5807335-5807755
		chrI:5164816-5165236	chrI:8224205-8224625	chrI:3176399-3176819					chrI:4977251-4977671	chrI:1844873-1845293	chrI:5936903-5937323
		chrI:5313042-5313462	chrI:8305345-8305765	chrI:3227893-3228313					chrI:5134430-5134850	chrI:1958344-1958764	chrI:5999214-5999634
		chrI:5658965-5659385	chrI:9115885-9116305	chrI:3516227-3516647					chrI:5311510-5311930	chrI:2011133-2011553	chrI:6220795-6221215
		chrI:6446515-6446935	chrI:9163312-9163732	chrI:3546853-3547273					chrI:5313025-5313445	chrI:2024557-2024977	chrI:6366147-6366567
		chrI:6493739-6494159	chrI:9605604-9606024	chrI:3636490-3636910					chrI:5485799-5486219	chrI:2096902-2097322	chrI:6611247-6611667
		chrI:6799393-6799813	chrI:9625889-9626309	chrI:3723365-3723785					chrI:5518682-5519102	chrI:2125103-2125523	chrI:6712840-6713260
		chrI:6835104-6835524	chrI:9853885-9854305	chrI:3781572-3781992					chrI:5608801-5609221	chrI:2306726-2307146	chrI:6835172-6835592
		chrI:7043202-7043622	chrI:9988689-9989109	chrI:3829584-3830004					chrI:5673551-5673971	chrI:2312936-2313356	chrI:6945566-6945986
		chrI:7200856-7201276	chrI:10025882-10026302	chrI:3906180-3906600					chrI:5706766-5707186	chrI:2321776-2322196	chrI:7082101-7082521
		chrI:7283718-7284138	chrI:10468892-10469312	chrI:4254083-4254503					chrI:5807325-5807745	chrI:2393375-2393795	chrI:7149517-7149937
		chrI:7500227-7500647	chrI:10474580-10475000	chrI:4444274-4444694					chrI:6151437-6151857	chrI:2401444-2401864	chrI:7314270-7314690
		chrI:7518333-7518753	chrI:10642287-10642707	chrI:4467810-4468230					chrI:6252776-6253196	chrI:2420397-2420817	chrI:7321440-7321860
		chrI:7658712-7659132	chrI:11095767-11096187	chrI:4584665-4585085					chrI:6366115-6366535	chrI:2433535-2433955	chrI:8027709-8028129
		chrI:8615027-8615447	chrI:11978523-11978943	chrI:4602817-4603237					chrI:6421754-6422174	chrI:2436891-2437311	chrI:8083242-8083662
		chrI:8728472-8728892	chrI:12198377-12198797	chrI:4653929-4654349					chrI:6541859-6542279	chrI:2586169-2586589	chrI:8614960-8615380
		chrI:8786749-8787169	chrI:13310184-13310604	chrI:4854948-4855368					chrI:6577027-6577447	chrI:2639574-2639994	chrI:8696222-8696642
		chrI:9076128-9076548	chrI:13463727-13464147	chrI:4860665-4861085					chrI:6579755-6580175	chrI:2648811-2649231	chrI:8728395-8728815
		chrI:9163305-9163725	chrI:13463975-13464395	chrI:5100523-5100943					chrI:6712793-6713213	chrI:2649940-2650360	chrI:8813256-8813676
		chrI:9374587-9375007	chrI:13817362-13817782	chrI:5164797-5165217					chrI:6757012-6757432	chrI:2667878-2668298	chrI:8816350-8816770
		chrI:9382744-9383164	chrI:14605879-14606299	chrI:5308222-5308642					chrI:6835153-6835573	chrI:2686371-2686791	chrI:9089087-9089507
		chrI:9393605-9394025	chrI:14863367-14863787	chrI:5377685-5378105					chrI:7128195-7128615	chrI:2689292-2689712	chrI:9113028-9113448
		chrI:9422152-9422572	chrII:1246880-1247300	chrI:5378467-5378887					chrI:7149530-7149950	chrI:2690295-2690715	chrI:9141593-9142013
		chrI:9619812-9620232	chrII:3055565-3055985	chrI:5410346-5410766					chrI:7174390-7174810	chrI:2856313-2856733	chrI:9163314-9163734
		chrI:9722095-9722515	chrII:3519007-3519427	chrI:5485757-5486177					chrI:7304628-7305048	chrI:2860956-2861376	chrI:9422169-9422589
		chrI:9848263-9848683	chrII:3519208-3519628	chrI:5608802-5609222					chrI:7500551-7500971	chrI:2863964-2864384	chrI:9619806-9620226
		chrI:9853942-9854362	chrII:3521249-3521669	chrI:5807325-5807745					chrI:7700864-7701284	chrI:2876313-2876733	chrI:9664982-9665402
		chrI:9979697-9980117	chrII:3567597-3568017	chrI:5871278-5871698					chrI:7798504-7798924	chrI:2878381-2878801	chrI:9788439-9788859
		chrI:10175998-10176418	chrII:4237865-4238285	chrI:5936913-5937333					chrI:7968677-7969097	chrI:2900889-2901309	chrI:10197129-10197549
		chrI:10565205-10565625	chrII:4381136-4381556	chrI:6220799-6221219					chrI:8024502-8024922	chrI:2927961-2928381	chrI:10297870-10298290
		chrI:10642295-10642715	chrII:4385443-4385863	chrI:6252737-6253157					chrI:8133590-8134010	chrI:2995989-2996409	chrI:10435670-10436090
		chrI:10748019-10748439	chrII:4394471-4394891	chrI:6341712-6342132					chrI:8409778-8410198	chrI:2996172-2996592	chrI:10532336-10532756
		chrI:11202126-11202546	chrII:4739934-4740354	chrI:6360475-6360895					chrI:8728426-8728846	chrI:3015276-3015696	chrI:10622708-10623128
		chrI:11203073-11203493	chrII:4791259-4791679	chrI:6366140-6366560					chrI:9076142-9076562	chrI:3032697-3033117	chrI:10642250-10642670
		chrI:11517110-11517530	chrII:5105091-5105511	chrI:6394729-6395149					chrI:9114603-9115023	chrI:3058989-3059409	chrI:10728638-10729058
		chrI:11611272-11611692	chrII:5358155-5358575	chrI:6421774-6422194					chrI:9115944-9116364	chrI:3101637-3102057	chrI:10749846-10750266
		chrI:11693504-11693924	chrII:5389911-5390331	chrI:6493811-6494231					chrI:9422168-9422588	chrI:3162444-3162864	chrI:10830767-10831187
		chrI:11940018-11940438	chrII:5577002-5577422	chrI:6505904-6506324					chrI:9525071-9525491	chrI:3176397-3176817	chrI:11578188-11578608
		chrI:12532113-12532533	chrII:5660962-5661382	chrI:6588377-6588797					chrI:9619789-9620209	chrI:3227892-3228312	chrI:11673157-11673577
		chrI:12652066-12652486	chrII:6061485-6061905	chrI:6610222-6610642					chrI:9664980-9665400	chrI:3501074-3501494	chrI:11873076-11873496
		chrI:12736658-12737078	chrII:6248443-6248863	chrI:6689891-6690311					chrI:9731228-9731648	chrI:3516215-3516635	chrI:11876080-11876500
		chrI:12876982-12877402	chrII:6411702-6412122	chrI:6809519-6809939					chrI:9788496-9788916	chrI:3533664-3534084	chrI:12652059-12652479
		chrI:13463751-13464171	chrII:6741427-6741847	chrI:6835193-6835613					chrI:9869104-9869524	chrI:3546831-3547251	chrI:12741102-12741522
		chrI:13470280-13470700	chrII:7001399-7001819	chrI:6945569-6945989					chrI:9979692-9980112	chrI:3671176-3671596	chrI:12826513-12826933
		chrI:13528054-13528474	chrII:7183899-7184319	chrI:6949251-6949671					chrI:9988797-9989217	chrI:3681852-3682272	chrI:13345200-13345620
		chrI:14756516-14756936	chrII:7708551-7708971	chrI:7053411-7053831					chrI:10025890-10026310	chrI:3684457-3684877	chrI:13372940-13373360
		chrI:14759307-14759727	chrII:8028152-8028572	chrI:7074306-7074726					chrI:10197162-10197582	chrI:3721432-3721852	chrI:13475457-13475877
		chrI:14947016-14947436	chrII:8075295-8075715	chrI:7090099-7090519					chrI:10400557-10400977	chrI:3860601-3861021	chrI:13659356-13659776
		chrII:133876-134296	chrII:8128691-8129111	chrI:7128154-7128574					chrI:10435679-10436099	chrI:4008553-4008973	chrI:14756642-14757062
		chrII:476067-476487	chrII:8325147-8325567	chrI:7149532-7149952					chrI:10622699-10623119	chrI:4085089-4085509	chrII:78382-78802
		chrII:484459-484879	chrII:8561232-8561652	chrI:7160734-7161154					chrI:10642263-10642683	chrI:4132088-4132508	chrII:598953-599373
		chrII:2206066-2206486	chrII:8927235-8927655	chrI:7251506-7251926					chrI:10894968-10895388	chrI:4172011-4172431	chrII:2832073-2832493
		chrII:2438935-2439355	chrII:9060327-9060747	chrI:7302934-7303354					chrI:11194939-11195359	chrI:4171997-4172417	chrII:2889174-2889594
		chrII:2450978-2451398	chrII:10395351-10395771	chrI:7314297-7314717					chrI:11517099-11517519	chrI:4178384-4178804	chrII:3209207-3209627
		chrII:2564943-2565363	chrII:10502700-10503120	chrI:7326071-7326491					chrI:11578194-11578614	chrI:4202607-4203027	chrII:3957485-3957905
		chrII:2794287-2794707	chrII:10761667-10762087	chrI:7347774-7348194					chrI:11611279-11611699	chrI:4210610-4211030	chrII:4299186-4299606
		chrII:2889196-2889616	chrII:10840049-10840469	chrI:7515684-7516104					chrI:11937219-11937639	chrI:4242343-4242763	chrII:4376652-4377072
		chrII:3076917-3077337	chrII:11534517-11534937	chrI:7548125-7548545					chrI:11964943-11965363	chrI:4308191-4308611	chrII:4881748-4882168
		chrII:3502617-3503037	chrII:11749748-11750168	chrI:7710342-7710762					chrI:12164626-12165046	chrI:4320706-4321126	chrII:5061752-5062172
		chrII:3523517-3523937	chrII:12175324-12175744	chrI:7749425-7749845					chrI:12652053-12652473	chrI:4420580-4421000	chrII:5320071-5320491
		chrII:4299225-4299645	chrII:13975094-13975514	chrI:7883926-7884346					chrI:12741064-12741484	chrI:4433005-4433425	chrII:5322684-5323104
		chrII:4376638-4377058	chrII:14063083-14063503	chrI:7961688-7962108					chrI:12826539-12826959	chrI:4516092-4516512	chrII:5330177-5330597
		chrII:4603021-4603441	chrII:14251338-14251758	chrI:8133576-8133996					chrI:12876973-12877393	chrI:4539822-4540242	chrII:5389910-5390330
		chrII:4739967-4740387	chrII:14496845-14497265	chrI:8349290-8349710					chrI:12920835-12921255	chrI:4584641-4585061	chrII:5460873-5461293
		chrII:4791255-4791675	chrII:14528226-14528646	chrI:8369602-8370022					chrI:13338827-13339247	chrI:4672121-4672541	chrII:5874180-5874600
		chrII:5220618-5221038	chrII:14794943-14795363	chrI:8409700-8410120					chrI:13463728-13464148	chrI:4744763-4745183	chrII:5911298-5911718
		chrII:5320305-5320725	chrII:14804520-14804940	chrI:8411050-8411470					chrI:13659341-13659761	chrI:4746847-4747267	chrII:5931070-5931490
		chrII:5358173-5358593	chrII:15089403-15089823	chrI:8535802-8536222					chrI:13839873-13840293	chrI:4772964-4773384	chrII:6489783-6490203
		chrII:5511723-5512143	chrII:15165877-15166297	chrI:8580758-8581178					chrI:14070714-14071134	chrI:4788403-4788823	chrII:6913297-6913717
		chrII:5661040-5661460	chrIII:844003-844423	chrI:8588650-8589070					chrI:14226197-14226617	chrI:4789822-4790242	chrII:6926383-6926803
		chrII:6061490-6061910	chrIII:1424267-1424687	chrI:8615036-8615456					chrI:14756631-14757051	chrI:4914221-4914641	chrII:7104990-7105410
		chrII:6951390-6951810	chrIII:1601420-1601840	chrI:8696182-8696602					chrI:14759315-14759735	chrI:4977237-4977657	chrII:7183494-7183914
		chrII:7337290-7337710	chrIII:1604576-1604996	chrI:8728409-8728829					chrI:14789857-14790277	chrI:4979776-4980196	chrII:7200114-7200534
		chrII:7360478-7360898	chrIII:1618913-1619333	chrI:8786747-8787167					chrI:14867572-14867992	chrI:5025249-5025669	chrII:7255583-7256003
		chrII:8086824-8087244	chrIII:1859540-1859960	chrI:8787581-8788001					chrII:51155-51575	chrI:5033181-5033601	chrII:7284965-7285385
		chrII:8184991-8185411	chrIII:3174966-3175386	chrI:8813248-8813668					chrII:81139-81559	chrI:5036914-5037334	chrII:7340674-7341094
		chrII:8328866-8329286	chrIII:3460050-3460470	chrI:9057804-9058224					chrII:202895-203315	chrI:5134441-5134861	chrII:7478617-7479037
		chrII:8516756-8517176	chrIII:3664211-3664631	chrI:9076108-9076528					chrII:476035-476455	chrI:5137835-5138255	chrII:7662292-7662712
		chrII:8561246-8561666	chrIII:3867350-3867770	chrI:9092229-9092649					chrII:604029-604449	chrI:5292594-5293014	chrII:8086790-8087210
		chrII:8787366-8787786	chrIII:4170960-4171380	chrI:9110789-9111209					chrII:1239541-1239961	chrI:5309634-5310054	chrII:8184995-8185415
		chrII:8969239-8969659	chrIII:4369273-4369693	chrI:9113036-9113456					chrII:2452502-2452922	chrI:5313056-5313476	chrII:8276047-8276467
		chrII:9057210-9057630	chrIII:4414055-4414475	chrI:9150145-9150565					chrII:3502609-3503029	chrI:5357856-5358276	chrII:8787394-8787814
		chrII:9264872-9265292	chrIII:4450689-4451109	chrI:9371832-9372252					chrII:4299219-4299639	chrI:5378486-5378906	chrII:8810996-8811416
		chrII:9273889-9274309	chrIII:4757029-4757449	chrI:9380143-9380563					chrII:4648812-4649232	chrI:5416259-5416679	chrII:9057244-9057664
		chrII:9620460-9620880	chrIII:4899659-4900079	chrI:9381400-9381820					chrII:4693186-4693606	chrI:5485801-5486221	chrII:9098968-9099388
		chrII:9986863-9987283	chrIII:4930258-4930678	chrI:9382754-9383174					chrII:4739949-4740369	chrI:5500803-5501223	chrII:9284859-9285279
		chrII:10395349-10395769	chrIII:5136213-5136633	chrI:9390060-9390480					chrII:4975319-4975739	chrI:5509110-5509530	chrII:9484974-9485394
		chrII:10459262-10459682	chrIII:5308252-5308672	chrI:9422156-9422576					chrII:5061759-5062179	chrI:5518653-5519073	chrII:9500961-9501381
		chrII:10542032-10542452	chrIII:5603542-5603962	chrI:9427875-9428295					chrII:5320103-5320523	chrI:5550399-5550819	chrII:9621074-9621494
		chrII:10554652-10555072	chrIII:5785537-5785957	chrI:9444283-9444703					chrII:5346305-5346725	chrI:5608817-5609237	chrII:9686879-9687299
		chrII:10840119-10840539	chrIII:6280181-6280601	chrI:9601474-9601894					chrII:5358174-5358594	chrI:5691568-5691988	chrII:9770059-9770479
		chrII:10868754-10869174	chrIII:6551423-6551843	chrI:9619783-9620203					chrII:5389917-5390337	chrI:5698899-5699319	chrII:10028174-10028594
		chrII:11534576-11534996	chrIII:7520629-7521049	chrI:9788484-9788904					chrII:5937368-5937788	chrI:5706804-5707224	chrII:10099918-10100338
		chrII:11749575-11749995	chrIII:7641983-7642403	chrI:9852449-9852869					chrII:6061489-6061909	chrI:5782943-5783363	chrII:10382291-10382711
		chrII:11759280-11759700	chrIII:8528963-8529383	chrI:9869107-9869527					chrII:6926081-6926501	chrI:5807343-5807763	chrII:10395351-10395771
		chrII:11980061-11980481	chrIII:8652893-8653313	chrI:9929349-9929769					chrII:7034049-7034469	chrI:5827002-5827422	chrII:10445728-10446148
		chrII:12102275-12102695	chrIII:8741416-8741836	chrI:9979680-9980100					chrII:7050123-7050543	chrI:5870512-5870932	chrII:10658730-10659150
		chrII:12659989-12660409	chrIII:8767875-8768295	chrI:10025866-10026286					chrII:7183490-7183910	chrI:5997402-5997822	chrII:10798472-10798892
		chrII:13193691-13194111	chrIII:8865378-8865798	chrI:10121979-10122399					chrII:8185000-8185420	chrI:6063613-6064033	chrII:10819972-10820392
		chrII:13199676-13200096	chrIII:8874090-8874510	chrI:10400546-10400966					chrII:8224879-8225299	chrI:6103130-6103550	chrII:10824045-10824465
		chrII:14063095-14063515	chrIII:9052608-9053028	chrI:10435659-10436079					chrII:8328930-8329350	chrI:6103859-6104279	chrII:11097320-11097740
		chrII:14154343-14154763	chrIII:9667862-9668282	chrI:10437792-10438212					chrII:8464515-8464935	chrI:6163366-6163786	chrII:11620073-11620493
		chrII:14251645-14252065	chrIII:9765427-9765847	chrI:10539013-10539433					chrII:8516755-8517175	chrI:6164047-6164467	chrII:11675923-11676343
		chrII:14528292-14528712	chrIII:10621239-10621659	chrI:10565808-10566228					chrII:8546976-8547396	chrI:6166638-6167058	chrII:11980124-11980544
		chrII:14794950-14795370	chrIII:10810932-10811352	chrI:10567439-10567859					chrII:8561227-8561647	chrI:6171442-6171862	chrII:12221344-12221764
		chrII:14856899-14857319	chrIII:10848822-10849242	chrI:10592914-10593334					chrII:8701907-8702327	chrI:6220793-6221213	chrII:13494737-13495157
		chrII:15089411-15089831	chrIII:10856808-10857228	chrI:10622676-10623096					chrII:8731714-8732134	chrI:6289998-6290418	chrII:14050424-14050844
		chrII:15232694-15233114	chrIII:11317053-11317473	chrI:10642250-10642670					chrII:8899369-8899789	chrI:6341676-6342096	chrII:14154342-14154762
		chrIII:349746-350166	chrIII:11371248-11371668	chrI:10797721-10798141					chrII:9057229-9057649	chrI:6364695-6365115	chrII:14251673-14252093
		chrIII:783254-783674	chrIII:11946339-11946759	chrI:10830759-10831179					chrII:9098999-9099419	chrI:6366151-6366571	chrII:14528368-14528788
		chrIII:793596-794016	chrIII:12250207-12250627	chrI:11098453-11098873					chrII:9112850-9113270	chrI:6373766-6374186	chrII:14684391-14684811
		chrIII:1142793-1143213	chrIII:12273591-12274011	chrI:11188038-11188458					chrII:9284908-9285328	chrI:6380769-6381189	chrIII:651655-652075
		chrIII:1540131-1540551	chrIII:12612442-12612862	chrI:11198485-11198905					chrII:9668956-9669376	chrI:6401485-6401905	chrIII:740166-740586
		chrIII:1558433-1558853	chrIII:12874654-12875074	chrI:11517099-11517519					chrII:9891276-9891696	chrI:6416691-6417111	chrIII:783251-783671
		chrIII:1859521-1859941	chrIII:13187758-13188178	chrI:11578166-11578586					chrII:10099902-10100322	chrI:6421765-6422185	chrIII:832929-833349
		chrIII:1921240-1921660	chrIII:13225016-13225436	chrI:11611242-11611662					chrII:10136745-10137165	chrI:6460654-6461074	chrIII:833716-834136
		chrIII:2375852-2376272	chrIII:13268797-13269217	chrI:11792662-11793082					chrII:10303720-10304140	chrI:6493739-6494159	chrIII:1080517-1080937
		chrIII:3279189-3279609	chrIII:13275900-13276320	chrI:11939990-11940410					chrII:10798478-10798898	chrI:6507344-6507764	chrIII:1142793-1143213
		chrIII:3322561-3322981	chrIV:385113-385533	chrI:11987957-11988377					chrII:10840049-10840469	chrI:6533791-6534211	chrIII:1228583-1229003
		chrIII:3460042-3460462	chrIV:521391-521811	chrI:12164599-12165019					chrII:10988637-10989057	chrI:6541877-6542297	chrIII:1602661-1603081
		chrIII:3476160-3476580	chrIV:682959-683379	chrI:12549176-12549596					chrII:11097339-11097759	chrI:6568882-6569302	chrIII:1859549-1859969
		chrIII:3540415-3540835	chrIV:1659018-1659438	chrI:12594336-12594756					chrII:12089614-12090034	chrI:6578898-6579318	chrIII:2294696-2295116
		chrIII:3867351-3867771	chrIV:1745583-1746003	chrI:12652049-12652469					chrII:12348929-12349349	chrI:6579707-6580127	chrIII:2471928-2472348
		chrIII:4196595-4197015	chrIV:3050445-3050865	chrI:12711442-12711862					chrII:12679629-12680049	chrI:6589095-6589515	chrIII:2578554-2578974
		chrIII:4519438-4519858	chrIV:3227436-3227856	chrI:12741049-12741469					chrII:13335120-13335540	chrI:6591884-6592304	chrIII:2631555-2631975
		chrIII:4577909-4578329	chrIV:3232826-3233246	chrI:12815948-12816368					chrII:13456609-13457029	chrI:6594045-6594465	chrIII:2804492-2804912
		chrIII:4649337-4649757	chrIV:3552077-3552497	chrI:12826484-12826904					chrII:13494752-13495172	chrI:6611230-6611650	chrIII:3307351-3307771
		chrIII:4756951-4757371	chrIV:4042241-4042661	chrI:12876968-12877388					chrII:13796703-13797123	chrI:6714603-6715023	chrIII:3460067-3460487
		chrIII:4849900-4850320	chrIV:4406031-4406451	chrI:13338813-13339233					chrII:14043196-14043616	chrI:6724322-6724742	chrIII:3471333-3471753
		chrIII:4899706-4900126	chrIV:5600236-5600656	chrI:13463727-13464147					chrII:14251341-14251761	chrI:6727539-6727959	chrIII:3773248-3773668
		chrIII:4930250-4930670	chrIV:6206382-6206802	chrI:13470219-13470639					chrII:14389986-14390406	chrI:6745335-6745755	chrIII:3867373-3867793
		chrIII:4962889-4963309	chrIV:6480981-6481401	chrI:14034104-14034524					chrII:14684392-14684812	chrI:6756309-6756729	chrIII:4237746-4238166
		chrIII:5013850-5014270	chrIV:6645742-6646162	chrI:14140357-14140777					chrII:14794958-14795378	chrI:6781552-6781972	chrIII:4332545-4332965
		chrIII:5014071-5014491	chrIV:7235323-7235743	chrI:14375901-14376321					chrII:14804571-14804991	chrI:6835146-6835566	chrIII:4562097-4562517
		chrIII:5031356-5031776	chrIV:8333932-8334352	chrI:14756608-14757028					chrII:14810551-14810971	chrI:6859888-6860308	chrIII:4689539-4689959
		chrIII:5308233-5308653	chrIV:8375372-8375792	chrI:14759303-14759723					chrII:15119923-15120343	chrI:6945546-6945966	chrIII:4962906-4963326
		chrIII:5500712-5501132	chrIV:8927007-8927427	chrI:14789899-14790319					chrIII:382122-382542	chrI:6949262-6949682	chrIII:5224921-5225341
		chrIII:5709917-5710337	chrIV:9477530-9477950	chrI:14845506-14845926					chrIII:517393-517813	chrI:6950997-6951417	chrIII:5274958-5275378
		chrIII:5721857-5722277	chrIV:12391112-12391532	chrI:14939832-14940252					chrIII:622741-623161	chrI:7020077-7020497	chrIII:5442789-5443209
		chrIII:5824559-5824979	chrIV:12594580-12595000	chrII:377122-377542					chrIII:1080552-1080972	chrI:7056565-7056985	chrIII:6132270-6132690
		chrIII:5871733-5872153	chrIV:14032535-14032955	chrII:476002-476422					chrIII:1142786-1143206	chrI:7080838-7081258	chrIII:6206220-6206640
		chrIII:5872236-5872656	chrIV:14033834-14034254	chrII:2204097-2204517					chrIII:1202141-1202561	chrI:7128144-7128564	chrIII:6280227-6280647
		chrIII:5947560-5947980	chrIV:14838187-14838607	chrII:2334898-2335318					chrIII:1418683-1419103	chrI:7139751-7140171	chrIII:6344689-6345109
		chrIII:6279954-6280374	chrIV:16382123-16382543	chrII:2646897-2647317					chrIII:1859531-1859951	chrI:7142104-7142524	chrIII:6431749-6432169
		chrIII:6359468-6359888	chrIV:16863447-16863867	chrII:2748242-2748662					chrIII:1921198-1921618	chrI:7148894-7149314	chrIII:6444300-6444720
		chrIII:6420977-6421397	chrIV:17099099-17099519	chrII:2889196-2889616					chrIII:1950219-1950639	chrI:7149536-7149956	chrIII:6463952-6464372
		chrIII:6421213-6421633	chrIV:17249693-17250113	chrII:2962535-2962955					chrIII:2375885-2376305	chrI:7251490-7251910	chrIII:6971905-6972325
		chrIII:6971877-6972297	chrM:8265-8685	chrII:3076919-3077339					chrIII:2648184-2648604	chrI:7286357-7286777	chrIII:7155727-7156147
		chrIII:7030425-7030845	chrM:12449-12869	chrII:3428167-3428587					chrIII:2871843-2872263	chrI:7288842-7289262	chrIII:7179642-7180062
		chrIII:7087920-7088340	chrV:155232-155652	chrII:3502606-3503026					chrIII:3036037-3036457	chrI:7302955-7303375	chrIII:7183991-7184411
		chrIII:7155713-7156133	chrV:1151252-1151672	chrII:3521325-3521745					chrIII:3279240-3279660	chrI:7304632-7305052	chrIII:7335227-7335647
		chrIII:7162255-7162675	chrV:1474569-1474989	chrII:3528219-3528639					chrIII:3307420-3307840	chrI:7307060-7307480	chrIII:7463588-7464008
		chrIII:7179659-7180079	chrV:2673827-2674247	chrII:3816217-3816637					chrIII:3323932-3324352	chrI:7314268-7314688	chrIII:7520653-7521073
		chrIII:7498375-7498795	chrV:4964164-4964584	chrII:4035348-4035768					chrIII:3460051-3460471	chrI:7321487-7321907	chrIII:7572873-7573293
		chrIII:7520640-7521060	chrV:6246518-6246938	chrII:4134791-4135211					chrIII:3471367-3471787	chrI:7347208-7347628	chrIII:7854472-7854892
		chrIII:7834805-7835225	chrV:6888827-6889247	chrII:4157824-4158244					chrIII:3669482-3669902	chrI:7472365-7472785	chrIII:8020905-8021325
		chrIII:7854496-7854916	chrV:7060350-7060770	chrII:4163740-4164160					chrIII:3867364-3867784	chrI:7476842-7477262	chrIII:8136442-8136862
		chrIII:8307346-8307766	chrV:7465494-7465914	chrII:4299235-4299655					chrIII:4171006-4171426	chrI:7500190-7500610	chrIII:8163829-8164249
		chrIII:8417191-8417611	chrV:8247784-8248204	chrII:4599851-4600271					chrIII:4193620-4194040	chrI:7562189-7562609	chrIII:8268297-8268717
		chrIII:8446930-8447350	chrV:8500350-8500770	chrII:4603025-4603445					chrIII:4378594-4379014	chrI:7563078-7563498	chrIII:8307347-8307767
		chrIII:8535433-8535853	chrV:9293250-9293670	chrII:4739972-4740392					chrIII:4756973-4757393	chrI:7596736-7597156	chrIII:8446920-8447340
		chrIII:8700524-8700944	chrV:9970091-9970511	chrII:4791260-4791680					chrIII:4899737-4900157	chrI:7658200-7658620	chrIII:8700570-8700990
		chrIII:8741453-8741873	chrV:10466794-10467214	chrII:5061724-5062144					chrIII:4930255-4930675	chrI:7659036-7659456	chrIII:8719696-8720116
		chrIII:8759683-8760103	chrV:10894594-10895014	chrII:5067934-5068354					chrIII:5031379-5031799	chrI:7679024-7679444	chrIII:8733281-8733701
		chrIII:8761338-8761758	chrV:11123921-11124341	chrII:5133387-5133807					chrIII:5233128-5233548	chrI:7700848-7701268	chrIII:8741414-8741834
		chrIII:8762134-8762554	chrV:12001979-12002399	chrII:5136271-5136691					chrIII:5591745-5592165	chrI:7798507-7798927	chrIII:8888965-8889385
		chrIII:8801837-8802257	chrV:12343565-12343985	chrII:5276706-5277126					chrIII:5602024-5602444	chrI:7866743-7867163	chrIII:8956239-8956659
		chrIII:8850645-8851065	chrV:12509905-12510325	chrII:5292084-5292504					chrIII:5603635-5604055	chrI:7871952-7872372	chrIII:9051314-9051734
		chrIII:8904081-8904501	chrV:12596784-12597204	chrII:5330082-5330502					chrIII:5871748-5872168	chrI:7935915-7936335	chrIII:9053868-9054288
		chrIII:8967742-8968162	chrV:12780248-12780668	chrII:5335332-5335752					chrIII:6158577-6158997	chrI:7951686-7952106	chrIII:9125901-9126321
		chrIII:9082408-9082828	chrV:12895874-12896294	chrII:5336572-5336992					chrIII:6278400-6278820	chrI:8022602-8023022	chrIII:9545977-9546397
		chrIII:9456134-9456554	chrV:13176355-13176775	chrII:5346293-5346713					chrIII:6344699-6345119	chrI:8024516-8024936	chrIII:9827584-9828004
		chrIII:9465414-9465834	chrV:13415540-13415960	chrII:5358172-5358592					chrIII:6431709-6432129	chrI:8027806-8028226	chrIII:10154919-10155339
		chrIII:9545947-9546367	chrV:13556674-13557094	chrII:5389912-5390332					chrIII:6444290-6444710	chrI:8029028-8029448	chrIII:10216936-10217356
		chrIII:9619044-9619464	chrV:13703918-13704338	chrII:5511710-5512130					chrIII:6971905-6972325	chrI:8083245-8083665	chrIII:10318745-10319165
		chrIII:9619243-9619663	chrV:13715265-13715685	chrII:5577058-5577478					chrIII:7116598-7117018	chrI:8125294-8125714	chrIII:10505166-10505586
		chrIII:9868112-9868532	chrV:14350953-14351373	chrII:5660994-5661414					chrIII:7162291-7162711	chrI:8133593-8134013	chrIII:10599684-10600104
		chrIII:9972368-9972788	chrV:15082277-15082697	chrII:5725112-5725532					chrIII:7179650-7180070	chrI:8245417-8245837	chrIII:10720141-10720561
		chrIII:10621217-10621637	chrV:15190881-15191301	chrII:5774829-5775249					chrIII:7272046-7272466	chrI:8254984-8255404	chrIII:10818462-10818882
		chrIII:10848826-10849246	chrV:16369987-16370407	chrII:5882381-5882801					chrIII:7498392-7498812	chrI:8259322-8259742	chrIII:10989408-10989828
		chrIII:10856779-10857199	chrV:16592120-16592540	chrII:5883680-5884100					chrIII:7499455-7499875	chrI:8290948-8291368	chrIII:11870007-11870427
		chrIII:10989426-10989846	chrV:19722800-19723220	chrII:5889284-5889704					chrIII:7520657-7521077	chrI:8305293-8305713	chrIII:12424062-12424482
		chrIII:11054524-11054944	chrV:20424750-20425170	chrII:5895498-5895918					chrIII:7572870-7573290	chrI:8369645-8370065	chrIII:12612434-12612854
		chrIII:11063230-11063650	chrV:20832645-20833065	chrII:5895706-5896126					chrIII:7659380-7659800	chrI:8412080-8412500	chrIII:12874681-12875101
		chrIII:11091526-11091946	chrX:593342-593762	chrII:5949592-5950012					chrIII:7710077-7710497	chrI:8567829-8568249	chrIII:13062517-13062937
		chrIII:11119324-11119744	chrX:601444-601864	chrII:5957642-5958062					chrIII:7940816-7941236	chrI:8615023-8615443	chrIII:13359787-13360207
		chrIII:11206891-11207311	chrX:806481-806901	chrII:5958729-5959149					chrIII:8020906-8021326	chrI:8696224-8696644	chrIII:13466187-13466607
		chrIII:11286095-11286515	chrX:1093102-1093522	chrII:5964934-5965354					chrIII:8029470-8029890	chrI:8728400-8728820	chrIII:13694046-13694466
		chrIII:11869974-11870394	chrX:2553451-2553871	chrII:6061460-6061880					chrIII:8136479-8136899	chrI:8759744-8760164	chrIV:884716-885136
		chrIII:11946340-11946760	chrX:2613095-2613515	chrII:6109137-6109557					chrIII:8417222-8417642	chrI:8761771-8762191	chrIV:1659078-1659498
		chrIII:12058432-12058852	chrX:2878062-2878482	chrII:6294180-6294600					chrIII:8446941-8447361	chrI:8785348-8785768	chrIV:1745609-1746029
		chrIII:12250233-12250653	chrX:2885322-2885742	chrII:6342459-6342879					chrIII:8491553-8491973	chrI:8813253-8813673	chrIV:2162268-2162688
		chrIII:12273587-12274007	chrX:3347896-3348316	chrII:6489752-6490172					chrIII:8719746-8720166	chrI:8816359-8816779	chrIV:2599642-2600062
		chrIII:12612436-12612856	chrX:3371235-3371655	chrII:6491708-6492128					chrIII:8733280-8733700	chrI:9057779-9058199	chrIV:3160748-3161168
		chrIII:12673366-12673786	chrX:3697549-3697969	chrII:6741381-6741801					chrIII:8767892-8768312	chrI:9079965-9080385	chrIV:3227444-3227864
		chrIII:12874684-12875104	chrX:4265578-4265998	chrII:6828445-6828865					chrIII:8847708-8848128	chrI:9087206-9087626	chrIV:3231688-3232108
		chrIII:12978796-12979216	chrX:4616761-4617181	chrII:6891070-6891490					chrIII:8888947-8889367	chrI:9089130-9089550	chrIV:3294529-3294949
		chrIII:13187755-13188175	chrX:4962266-4962686	chrII:6913242-6913662					chrIII:8904078-8904498	chrI:9116011-9116431	chrIV:3653356-3653776
		chrIII:13439398-13439818	chrX:5063864-5064284	chrII:6941461-6941881					chrIII:8956250-8956670	chrI:9141601-9142021	chrIV:3813960-3814380
		chrIII:13466219-13466639	chrX:5085455-5085875	chrII:6943588-6944008					chrIII:9007119-9007539	chrI:9149196-9149616	chrIV:3875255-3875675
		chrIII:13474390-13474810	chrX:5429353-5429773	chrII:7104933-7105353					chrIII:9053873-9054293	chrI:9150131-9150551	chrIV:4445724-4446144
		chrIII:13643550-13643970	chrX:5591792-5592212	chrII:7141512-7141932					chrIII:9353806-9354226	chrI:9163324-9163744	chrIV:5364146-5364566
		chrIII:13722360-13722780	chrX:5707777-5708197	chrII:7181353-7181773					chrIII:9973048-9973468	chrI:9248708-9249128	chrIV:5394722-5395142
		chrIV:257121-257541	chrX:5801305-5801725	chrII:7182646-7183066					chrIII:10094439-10094859	chrI:9268806-9269226	chrIV:5591063-5591483
		chrIV:385184-385604	chrX:5816323-5816743	chrII:7183886-7184306					chrIII:10203195-10203615	chrI:9280602-9281022	chrIV:5600293-5600713
		chrIV:956000-956420	chrX:6593411-6593831	chrII:7281669-7282089					chrIII:10318737-10319157	chrI:9307516-9307936	chrIV:6335914-6336334
		chrIV:1659003-1659423	chrX:7264910-7265330	chrII:7325116-7325536					chrIII:10505175-10505595	chrI:9315341-9315761	chrIV:6376539-6376959
		chrIV:1745589-1746009	chrX:7569631-7570051	chrII:7326328-7326748					chrIII:10634044-10634464	chrI:9354268-9354688	chrIV:6500858-6501278
		chrIV:2388917-2389337	chrX:7809455-7809875	chrII:7343264-7343684					chrIII:10720163-10720583	chrI:9380202-9380622	chrIV:6576688-6577108
		chrIV:2601977-2602397	chrX:8155928-8156348	chrII:7583460-7583880					chrIII:10848819-10849239	chrI:9382766-9383186	chrIV:6785826-6786246
		chrIV:2725772-2726192	chrX:8386098-8386518	chrII:7593118-7593538					chrIII:11825641-11826061	chrI:9390053-9390473	chrIV:7084729-7085149
		chrIV:3050449-3050869	chrX:8404307-8404727	chrII:7705191-7705611					chrIII:11870008-11870428	chrI:9393584-9394004	chrIV:7391495-7391915
		chrIV:3843999-3844419	chrX:8810968-8811388	chrII:7755113-7755533					chrIII:12149713-12150133	chrI:9401725-9402145	chrIV:7508060-7508480
		chrIV:3853545-3853965	chrX:8817935-8818355	chrII:7857563-7857983					chrIII:12250229-12250649	chrI:9405247-9405667	chrIV:7789486-7789906
		chrIV:4042233-4042653	chrX:9296585-9297005	chrII:7884871-7885291					chrIII:12687995-12688415	chrI:9422164-9422584	chrIV:7902474-7902894
		chrIV:4171761-4172181	chrX:9506264-9506684	chrII:7887378-7887798					chrIII:12874691-12875111	chrI:9426436-9426856	chrIV:8136079-8136499
		chrIV:5169282-5169702	chrX:9932289-9932709	chrII:8059471-8059891					chrIII:13002136-13002556	chrI:9428158-9428578	chrIV:8359952-8360372
		chrIV:5364137-5364557	chrX:10766191-10766611	chrII:8071697-8072117					chrIII:13105461-13105881	chrI:9449893-9450313	chrIV:8375358-8375778
		chrIV:6206372-6206792	chrX:10963624-10964044	chrII:8086751-8087171					chrIII:13152643-13153063	chrI:9511984-9512404	chrIV:8379300-8379720
		chrIV:6751339-6751759	chrX:10990574-10990994	chrII:8128292-8128712					chrIII:13466217-13466637	chrI:9556925-9557345	chrIV:8620073-8620493
		chrIV:6919323-6919743	chrX:11206952-11207372	chrII:8130191-8130611					chrIII:13530013-13530433	chrI:9605626-9606046	chrIV:8743910-8744330
		chrIV:7084722-7085142	chrX:11252392-11252812	chrII:8131296-8131716					chrIII:13530827-13531247	chrI:9609475-9609895	chrIV:9196758-9197178
		chrIV:7766951-7767371	chrX:11757695-11758115	chrII:8137317-8137737					chrIV:620314-620734	chrI:9619793-9620213	chrIV:9677632-9678052
		chrIV:7816661-7817081	chrX:11937358-11937778	chrII:8157913-8158333					chrIV:657877-658297	chrI:9664967-9665387	chrIV:9995013-9995433
		chrIV:8015864-8016284	chrX:12106018-12106438	chrII:8184947-8185367					chrIV:854270-854690	chrI:9709315-9709735	chrIV:10128992-10129412
		chrIV:8142930-8143350	chrX:12458015-12458435	chrII:8216309-8216729					chrIV:884708-885128	chrI:9722154-9722574	chrIV:10197327-10197747
		chrIV:9196729-9197149	chrX:12563622-12564042	chrII:8328878-8329298					chrIV:1659046-1659466	chrI:9731203-9731623	chrIV:10252320-10252740
		chrIV:9444410-9444830	chrX:12660956-12661376	chrII:8374269-8374689					chrIV:2388945-2389365	chrI:9733437-9733857	chrIV:10373869-10374289
		chrIV:9797547-9797967	chrX:12670325-12670745	chrII:8451392-8451812					chrIV:3294546-3294966	chrI:9750950-9751370	chrIV:10933045-10933465
		chrIV:10483705-10484125	chrX:12876807-12877227	chrII:8516697-8517117					chrIV:3385259-3385679	chrI:9788503-9788923	chrIV:10936835-10937255
		chrIV:10803953-10804373	chrX:12890121-12890541	chrII:8561170-8561590					chrIV:3515610-3516030	chrI:9789902-9790322	chrIV:11026627-11027047
		chrIV:11149548-11149968	chrX:13121105-13121525	chrII:8785802-8786222					chrIV:3725835-3726255	chrI:9853837-9854257	chrIV:11027629-11028049
		chrIV:11566106-11566526	chrX:13145001-13145421	chrII:8787340-8787760					chrIV:4028153-4028573	chrI:9979692-9980112	chrIV:11036213-11036633
		chrIV:11593340-11593760	chrX:13306844-13307264	chrII:8809221-8809641					chrIV:4445699-4446119	chrI:9984894-9985314	chrIV:11118987-11119407
		chrIV:11765512-11765932	chrX:13511821-13512241	chrII:8958474-8958894					chrIV:4513499-4513919	chrI:9988796-9989216	chrIV:11149600-11150020
		chrIV:11961681-11962101	chrX:13781450-13781870	chrII:9004958-9005378					chrIV:4660268-4660688	chrI:10025879-10026299	chrIV:11433721-11434141
		chrIV:12391127-12391547	chrX:14840969-14841389	chrII:9013281-9013701					chrIV:4810354-4810774	chrI:10032490-10032910	chrIV:11593345-11593765
		chrIV:13240484-13240904	chrX:15107901-15108321	chrII:9052760-9053180					chrIV:5359863-5360283	chrI:10079474-10079894	chrIV:11961664-11962084
		chrIV:14033152-14033572	chrX:15274989-15275409	chrII:9098921-9099341					chrIV:5394683-5395103	chrI:10099889-10100309	chrIV:12121058-12121478
		chrIV:14326948-14327368	chrX:15353983-15354403	chrII:9112789-9113209					chrIV:5600289-5600709	chrI:10121981-10122401	chrIV:12268361-12268781
		chrIV:14464037-14464457	chrX:15606725-15607145	chrII:9115562-9115982					chrIV:5604437-5604857	chrI:10284323-10284743	chrIV:12840327-12840747
		chrIV:14606554-14606974	chrX:16590798-16591218	chrII:9141037-9141457					chrIV:5754006-5754426	chrI:10288493-10288913	chrIV:12879551-12879971
		chrIV:14767700-14768120	chrX:16604507-16604927	chrII:9144269-9144689					chrIV:6336754-6337174	chrI:10297819-10298239	chrIV:13231370-13231790
		chrIV:14959483-14959903	chrX:16612592-16613012	chrII:9498438-9498858					chrIV:6376512-6376932	chrI:10374430-10374850	chrIV:13240471-13240891
		chrIV:16415571-16415991	chrX:16634621-16635041	chrII:9544332-9544752					chrIV:6548587-6549007	chrI:10381877-10382297	chrIV:13386065-13386485
		chrIV:16656258-16656678	chrX:17184316-17184736	chrII:9565985-9566405					chrIV:6576651-6577071	chrI:10400571-10400991	chrIV:13502947-13503367
		chrIV:16845296-16845716		chrII:9667100-9667520					chrIV:8136125-8136545	chrI:10435671-10436091	chrIV:13865120-13865540
		chrV:265260-265680		chrII:9668902-9669322					chrIV:8322205-8322625	chrI:10437804-10438224	chrIV:13938043-13938463
		chrV:1151330-1151750		chrII:9680811-9681231					chrIV:8333947-8334367	chrI:10532303-10532723	chrIV:14033831-14034251
		chrV:1307736-1308156		chrII:9760387-9760807					chrIV:8375358-8375778	chrI:10565820-10566240	chrIV:14464079-14464499
		chrV:2204075-2204495		chrII:9834384-9834804					chrIV:8379280-8379700	chrI:10567457-10567877	chrIV:14612902-14613322
		chrV:2600547-2600967		chrII:9956019-9956439					chrIV:8743950-8744370	chrI:10592930-10593350	chrIV:14767704-14768124
		chrV:2672626-2673046		chrII:10025761-10026181					chrIV:8782183-8782603	chrI:10642267-10642687	chrIV:14874963-14875383
		chrV:3820870-3821290		chrII:10132735-10133155					chrIV:8785194-8785614	chrI:10686973-10687393	chrIV:15039534-15039954
		chrV:3874290-3874710		chrII:10169132-10169552					chrIV:9196751-9197171	chrI:10728647-10729067	chrIV:17093690-17094110
		chrV:5039567-5039987		chrII:10303673-10304093					chrIV:9477554-9477974	chrI:10745435-10745855	chrIV:17278389-17278809
		chrV:5304376-5304796		chrII:10395302-10395722					chrIV:9667047-9667467	chrI:10749847-10750267	chrV:8068-8488
		chrV:5505037-5505457		chrII:10502590-10503010					chrIV:10483705-10484125	chrI:10752924-10753344	chrV:1003670-1004090
		chrV:5684551-5684971		chrII:10551871-10552291					chrIV:10503864-10504284	chrI:10777278-10777698	chrV:1743471-1743891
		chrV:5790761-5791181		chrII:10652040-10652460					chrIV:11026625-11027045	chrI:10830752-10831172	chrV:3195056-3195476
		chrV:5939461-5939881		chrII:10658639-10659059					chrIV:11027642-11028062	chrI:10924669-10925089	chrV:3523227-3523647
		chrV:6100574-6100994		chrII:10666756-10667176					chrIV:11111214-11111634	chrI:10927350-10927770	chrV:3644237-3644657
		chrV:6224508-6224928		chrII:10719929-10720349					chrIV:11149572-11149992	chrI:11084554-11084974	chrV:4143146-4143566
		chrV:6342534-6342954		chrII:10730656-10731076					chrIV:11433737-11434157	chrI:11095648-11096068	chrV:4823544-4823964
		chrV:6721233-6721653		chrII:10735779-10736199					chrIV:11474016-11474436	chrI:11103055-11103475	chrV:5086990-5087410
		chrV:6768598-6769018		chrII:10839994-10840414					chrIV:11566128-11566548	chrI:11194986-11195406	chrV:5269015-5269435
		chrV:6785111-6785531		chrII:10907266-10907686					chrIV:11694138-11694558	chrI:11517103-11517523	chrV:5329667-5330087
		chrV:7060362-7060782		chrII:10926118-10926538					chrIV:11710336-11710756	chrI:11578175-11578595	chrV:5575984-5576404
		chrV:7084751-7085171		chrII:11097261-11097681					chrIV:11857079-11857499	chrI:11611252-11611672	chrV:5650719-5651139
		chrV:7465524-7465944		chrII:11126340-11126760					chrIV:11961646-11962066	chrI:11792745-11793165	chrV:5674491-5674911
		chrV:7555852-7556272		chrII:11143834-11144254					chrIV:12121067-12121487	chrI:11798559-11798979	chrV:5684534-5684954
		chrV:7894014-7894434		chrII:11157548-11157968					chrIV:12268338-12268758	chrI:11873076-11873496	chrV:6000270-6000690
		chrV:8000813-8001233		chrII:11343365-11343785					chrIV:12451222-12451642	chrI:11876047-11876467	chrV:6043846-6044266
		chrV:8500339-8500759		chrII:11357683-11358103					chrIV:12816939-12817359	chrI:11937189-11937609	chrV:6240801-6241221
		chrV:8555944-8556364		chrII:11375942-11376362					chrIV:13022754-13023174	chrI:11978615-11979035	chrV:6450363-6450783
		chrV:8599937-8600357		chrII:11406701-11407121					chrIV:13169418-13169838	chrI:12164604-12165024	chrV:6785096-6785516
		chrV:8683740-8684160		chrII:11453565-11453985					chrIV:13240457-13240877	chrI:12541974-12542394	chrV:7465501-7465921
		chrV:10065679-10066099		chrII:11759204-11759624					chrIV:13777486-13777906	chrI:12544506-12544926	chrV:7978725-7979145
		chrV:10285848-10286268		chrII:11959141-11959561					chrIV:13919206-13919626	chrI:12572233-12572653	chrV:8013975-8014395
		chrV:10352757-10353177		chrII:11980043-11980463					chrIV:14033574-14033994	chrI:12652059-12652479	chrV:8611003-8611423
		chrV:10736752-10737172		chrII:12006600-12007020					chrIV:14070910-14071330	chrI:12741074-12741494	chrV:8796843-8797263
		chrV:10894597-10895017		chrII:12041946-12042366					chrIV:14464054-14464474	chrI:12826493-12826913	chrV:9546783-9547203
		chrV:10961537-10961957		chrII:12089773-12090193					chrIV:14959473-14959893	chrI:12903836-12904256	chrV:9729728-9730148
		chrV:10965468-10965888		chrII:12107740-12108160					chrIV:15039512-15039932	chrI:12968404-12968824	chrV:9731189-9731609
		chrV:11039496-11039916		chrII:12202882-12203302					chrIV:15312035-15312455	chrI:13104020-13104440	chrV:10019892-10020312
		chrV:11123930-11124350		chrII:12260484-12260904					chrIV:16398568-16398988	chrI:13138750-13139170	chrV:10163597-10164017
		chrV:11506260-11506680		chrII:12367097-12367517					chrIV:16656212-16656632	chrI:13142565-13142985	chrV:10255001-10255421
		chrV:11521426-11521846		chrII:12378613-12379033					chrIV:16663562-16663982	chrI:13161726-13162146	chrV:10578918-10579338
		chrV:11979881-11980301		chrII:12533433-12533853					chrV:1264327-1264747	chrI:13289649-13290069	chrV:10722631-10723051
		chrV:11980086-11980506		chrII:12653094-12653514					chrV:1425584-1426004	chrI:13290849-13291269	chrV:10894593-10895013
		chrV:12291610-12292030		chrII:12659901-12660321					chrV:1743455-1743875	chrI:13338831-13339251	chrV:11078339-11078759
		chrV:12343547-12343967		chrII:12679560-12679980					chrV:1871748-1872168	chrI:13391075-13391495	chrV:11326965-11327385
		chrV:12636528-12636948		chrII:12798647-12799067					chrV:2109238-2109658	chrI:13470275-13470695	chrV:11675033-11675453
		chrV:13169203-13169623		chrII:12953287-12953707					chrV:2259766-2260186	chrI:13475463-13475883	chrV:11859306-11859726
		chrV:13551587-13552007		chrII:13012529-13012949					chrV:3195062-3195482	chrI:13509789-13510209	chrV:11951180-11951600
		chrV:13556641-13557061		chrII:13181469-13181889					chrV:5684539-5684959	chrI:13559625-13560045	chrV:12117515-12117935
		chrV:13657264-13657684		chrII:13199625-13200045					chrV:6000311-6000731	chrI:13571947-13572367	chrV:12300191-12300611
		chrV:13715268-13715688		chrII:14063017-14063437					chrV:6043841-6044261	chrI:13588976-13589396	chrV:12537698-12538118
		chrV:13803787-13804207		chrII:14251287-14251707					chrV:6100601-6101021	chrI:13650750-13651170	chrV:13082560-13082980
		chrV:13832696-13833116		chrII:14496738-14497158					chrV:6110476-6110896	chrI:13815768-13816188	chrV:13556662-13557082
		chrV:14055016-14055436		chrII:14528243-14528663					chrV:7060325-7060745	chrI:14051767-14052187	chrV:13789354-13789774
		chrV:14200048-14200468		chrII:14598234-14598654					chrV:7196438-7196858	chrI:14058709-14059129	chrV:13808408-13808828
		chrV:14347200-14347620		chrII:14794894-14795314					chrV:7230854-7231274	chrI:14104281-14104701	chrV:13909412-13909832
		chrV:14685543-14685963		chrII:14856822-14857242					chrV:7465519-7465939	chrI:14346624-14347044	chrV:14012068-14012488
		chrV:15082285-15082705		chrII:14900155-14900575					chrV:7734901-7735321	chrI:14496399-14496819	chrV:14685546-14685966
		chrV:15190947-15191367		chrII:14941026-14941446					chrV:8000863-8001283	chrI:14605864-14606284	chrV:14848487-14848907
		chrV:15511593-15512013		chrII:15076072-15076492					chrV:8221130-8221550	chrI:14627930-14628350	chrV:14849616-14850036
		chrV:15663149-15663569		chrII:15089330-15089750					chrV:8500338-8500758	chrI:14657084-14657504	chrV:15136758-15137178
		chrV:16022615-16023035		chrII:15173069-15173489					chrV:8936147-8936567	chrI:14662814-14663234	chrV:15511601-15512021
		chrV:16401509-16401929		chrII:15189965-15190385					chrV:9296965-9297385	chrI:14692028-14692448	chrV:16000475-16000895
		chrV:16537942-16538362		chrII:15232623-15233043					chrV:9424499-9424919	chrI:14710862-14711282	chrV:16724557-16724977
		chrV:16598473-16598893		chrIII:25542-25962					chrV:9729760-9730180	chrI:14737274-14737694	chrV:16882489-16882909
		chrV:18581740-18582160		chrIII:31585-32005					chrV:9970139-9970559	chrI:14756599-14757019	chrV:17752266-17752686
		chrV:19125777-19126197		chrIII:351859-352279					chrV:10204929-10205349	chrI:14759334-14759754	chrV:18967653-18968073
		chrV:19897557-19897977		chrIII:483540-483960					chrV:10361763-10362183	chrI:14789862-14790282	chrV:19153255-19153675
		chrV:20424742-20425162		chrIII:670920-671340					chrV:10478227-10478647	chrI:14881114-14881534	chrV:19158663-19159083
		chrV:20555122-20555542		chrIII:832926-833346					chrV:10718387-10718807	chrI:14913387-14913807	chrV:19527568-19527988
		chrV:20580513-20580933		chrIII:889104-889524					chrV:10894577-10894997	chrI:14947999-14948419	chrV:19529144-19529564
		chrX:410018-410438		chrIII:1080535-1080955					chrV:10965464-10965884	chrI:15017043-15017463	chrV:20005674-20006094
		chrX:1389380-1389800		chrIII:1142788-1143208					chrV:11078374-11078794	chrI:15041356-15041776	chrV:20418764-20419184
		chrX:1446786-1447206		chrIII:1202149-1202569					chrV:11314004-11314424	chrII:78377-78797	chrV:20749056-20749476
		chrX:2763358-2763778		chrIII:1540102-1540522					chrV:11326957-11327377	chrII:476016-476436	chrV:20752598-20753018
		chrX:2791852-2792272		chrIII:1601391-1601811					chrV:11335700-11336120	chrII:521780-522200	chrV:20754977-20755397
		chrX:3127464-3127884		chrIII:1742939-1743359					chrV:11675017-11675437	chrII:598934-599354	chrV:20770839-20771259
		chrX:3379062-3379482		chrIII:1859519-1859939					chrV:11979865-11980285	chrII:1134493-1134913	chrX:1035040-1035460
		chrX:3502762-3503182		chrIII:1921198-1921618					chrV:12294976-12295396	chrII:1202560-1202980	chrX:1453779-1454199
		chrX:4106922-4107342		chrIII:1925093-1925513					chrV:12300213-12300633	chrII:1297262-1297682	chrX:2316203-2316623
		chrX:4209057-4209477		chrIII:2129936-2130356					chrV:12649621-12650041	chrII:1437503-1437923	chrX:2432508-2432928
		chrX:4464353-4464773		chrIII:2331208-2331628					chrV:12780283-12780703	chrII:1519803-1520223	chrX:2667813-2668233
		chrX:5260378-5260798		chrIII:2375846-2376266					chrV:13176337-13176757	chrII:1525403-1525823	chrX:2688523-2688943
		chrX:5265564-5265984		chrIII:2426054-2426474					chrV:13209535-13209955	chrII:2176636-2177056	chrX:2972476-2972896
		chrX:5591736-5592156		chrIII:2535207-2535627					chrV:13497434-13497854	chrII:2204065-2204485	chrX:3245793-3246213
		chrX:5841088-5841508		chrIII:2814970-2815390					chrV:13556669-13557089	chrII:2323140-2323560	chrX:3835648-3836068
		chrX:6221089-6221509		chrIII:2922259-2922679					chrV:13575885-13576305	chrII:2412713-2413133	chrX:4113694-4114114
		chrX:6296372-6296792		chrIII:3036012-3036432					chrV:13715240-13715660	chrII:2420676-2421096	chrX:4439606-4440026
		chrX:6436425-6436845		chrIII:3145555-3145975					chrV:13808416-13808836	chrII:2451011-2451431	chrX:4462380-4462800
		chrX:7569661-7570081		chrIII:3266497-3266917					chrV:14012085-14012505	chrII:2648992-2649412	chrX:4469286-4469706
		chrX:8231953-8232373		chrIII:3279205-3279625					chrV:14055023-14055443	chrII:2806496-2806916	chrX:5085511-5085931
		chrX:9166922-9167342		chrIII:3311211-3311631					chrV:14347210-14347630	chrII:2807694-2808114	chrX:5475078-5475498
		chrX:9597261-9597681		chrIII:3323902-3324322					chrV:14428166-14428586	chrII:2860386-2860806	chrX:5781216-5781636
		chrX:9828885-9829305		chrIII:3388940-3389360					chrV:14696786-14697206	chrII:2889203-2889623	chrX:6204875-6205295
		chrX:10387159-10387579		chrIII:3460044-3460464					chrV:15136742-15137162	chrII:2970462-2970882	chrX:6749243-6749663
		chrX:10462412-10462832		chrIII:3509900-3510320					chrV:15511588-15512008	chrII:2971675-2972095	chrX:6844411-6844831
		chrX:10568649-10569069		chrIII:3537384-3537804					chrV:16000428-16000848	chrII:3076903-3077323	chrX:6934445-6934865
		chrX:11206915-11207335		chrIII:3540379-3540799					chrV:16498993-16499413	chrII:3214115-3214535	chrX:7244781-7245201
		chrX:11458883-11459303		chrIII:3622477-3622897					chrV:17921406-17921826	chrII:3267763-3268183	chrX:7306448-7306868
		chrX:11600774-11601194		chrIII:3735693-3736113					chrV:17951175-17951595	chrII:3502617-3503037	chrX:7661643-7662063
		chrX:11606014-11606434		chrIII:3773240-3773660					chrV:18533639-18534059	chrII:3521367-3521787	chrX:7680880-7681300
		chrX:11937330-11937750		chrIII:3820857-3821277					chrV:18967644-18968064	chrII:3523536-3523956	chrX:7782376-7782796
		chrX:12182970-12183390		chrIII:3867345-3867765					chrV:19119221-19119641	chrII:3682771-3683191	chrX:7809544-7809964
		chrX:12668947-12669367		chrIII:3954127-3954547					chrV:19153256-19153676	chrII:3951379-3951799	chrX:8019675-8020095
		chrX:13212533-13212953		chrIII:3996091-3996511					chrV:19529171-19529591	chrII:3952968-3953388	chrX:8231842-8232262
		chrX:13557246-13557666		chrIII:4063665-4064085					chrV:20005709-20006129	chrII:3954045-3954465	chrX:8421983-8422403
		chrX:14593133-14593553		chrIII:4085664-4086084					chrV:20068378-20068798	chrII:3957456-3957876	chrX:8546010-8546430
		chrX:14731820-14732240		chrIII:4170943-4171363					chrV:20580513-20580933	chrII:3992619-3993039	chrX:8810914-8811334
		chrX:14813357-14813777		chrIII:4196573-4196993					chrV:20752631-20753051	chrII:4049740-4050160	chrX:9150250-9150670
		chrX:14853773-14854193		chrIII:4234645-4235065					chrV:20758394-20758814	chrII:4237880-4238300	chrX:9822529-9822949
		chrX:15013707-15014127		chrIII:4419306-4419726					chrV:20831819-20832239	chrII:4299176-4299596	chrX:9851909-9852329
		chrX:15040720-15041140		chrIII:4456540-4456960					chrX:382668-383088	chrII:4372345-4372765	chrX:10148236-10148656
		chrX:15215154-15215574		chrIII:4503557-4503977					chrX:871108-871528	chrII:4376658-4377078	chrX:10396460-10396880
		chrX:15354003-15354423		chrIII:4756937-4757357					chrX:1035077-1035497	chrII:4469109-4469529	chrX:10694950-10695370
		chrX:15555982-15556402		chrIII:4815733-4816153					chrX:1319707-1320127	chrII:4603007-4603427	chrX:11409472-11409892
		chrX:16122631-16123051		chrIII:4878218-4878638					chrX:1446799-1447219	chrII:4701597-4702017	chrX:11466445-11466865
		chrX:16122830-16123250		chrIII:4899632-4900052					chrX:1454312-1454732	chrII:4768222-4768642	chrX:11522135-11522555
		chrX:16448483-16448903		chrIII:4917933-4918353					chrX:2089426-2089846	chrII:4791263-4791683	chrX:11664173-11664593
		chrX:16815486-16815906		chrIII:4930221-4930641					chrX:2382205-2382625	chrII:4802880-4803300	chrX:11937327-11937747
		chrX:16957992-16958412		chrIII:5014006-5014426					chrX:2688504-2688924	chrII:4902011-4902431	chrX:11947072-11947492
		chrX:17181584-17182004		chrIII:5024336-5024756					chrX:2876486-2876906	chrII:4945696-4946116	chrX:12179002-12179422
		chrX:17528090-17528510		chrIII:5047171-5047591					chrX:2901016-2901436	chrII:4959718-4960138	chrX:12393808-12394228
		chrX:17544355-17544775		chrIII:5077878-5078298					chrX:3102849-3103269	chrII:4967598-4968018	chrX:12454286-12454706
		chrX:17545485-17545905		chrIII:5185563-5185983					chrX:3111755-3112175	chrII:4994944-4995364	chrX:12629985-12630405
				chrIII:5201749-5202169					chrX:3245764-3246184	chrII:5096021-5096441	chrX:12975622-12976042
				chrIII:5500705-5501125					chrX:3306908-3307328	chrII:5201878-5202298	chrX:13156393-13156813
				chrIII:5501835-5502255					chrX:3379017-3379437	chrII:5292311-5292731	chrX:13159041-13159461
				chrIII:5517389-5517809					chrX:3697548-3697968	chrII:5306342-5306762	chrX:13250221-13250641
				chrIII:5591731-5592151					chrX:3945647-3946067	chrII:5320069-5320489	chrX:13306887-13307307
				chrIII:5603546-5603966					chrX:4469272-4469692	chrII:5322714-5323134	chrX:13353574-13353994
				chrIII:5621149-5621569					chrX:4503234-4503654	chrII:5330083-5330503	chrX:13669638-13670058
				chrIII:5688213-5688633					chrX:4513604-4514024	chrII:5337510-5337930	chrX:13995781-13996201
				chrIII:5721811-5722231					chrX:4800039-4800459	chrII:5346334-5346754	chrX:14146810-14147230
				chrIII:5840213-5840633					chrX:4962340-4962760	chrII:5358181-5358601	chrX:14505989-14506409
				chrIII:5843614-5844034					chrX:5063932-5064352	chrII:5389922-5390342	chrX:14557305-14557725
				chrIII:5871689-5872109					chrX:5360698-5361118	chrII:5577079-5577499	chrX:14560116-14560536
				chrIII:5937047-5937467					chrX:5538949-5539369	chrII:5585795-5586215	chrX:14746998-14747418
				chrIII:5940339-5940759					chrX:5686034-5686454	chrII:5688943-5689363	chrX:14813344-14813764
				chrIII:6139873-6140293					chrX:5781235-5781655	chrII:5707368-5707788	chrX:14839368-14839788
				chrIII:6344646-6345066					chrX:5782167-5782587	chrII:5751343-5751763	chrX:14841070-14841490
				chrIII:6348530-6348950					chrX:6926927-6927347	chrII:5846159-5846579	chrX:14853774-14854194
				chrIII:6604969-6605389					chrX:6934448-6934868	chrII:5874180-5874600	chrX:14978647-14979067
				chrIII:6638532-6638952					chrX:7151226-7151646	chrII:5886845-5887265	chrX:15246591-15247011
				chrIII:6675353-6675773					chrX:7306399-7306819	chrII:5907497-5907917	chrX:15276660-15277080
				chrIII:6730445-6730865					chrX:7661612-7662032	chrII:5911278-5911698	chrX:15354128-15354548
				chrIII:6971814-6972234					chrX:7782399-7782819	chrII:6045199-6045619	chrX:15607567-15607987
				chrIII:7090489-7090909					chrX:7809559-7809979	chrII:6061486-6061906	chrX:16612278-16612698
				chrIII:7162228-7162648					chrX:7951479-7951899	chrII:6123489-6123909	chrX:16679018-16679438
				chrIII:7179576-7179996					chrX:8019671-8020091	chrII:6178692-6179112	chrX:16813982-16814402
				chrIII:7183951-7184371					chrX:8155943-8156363	chrII:6234173-6234593	chrX:16872468-16872888
				chrIII:7242934-7243354					chrX:8422001-8422421	chrII:6235396-6235816	chrX:17184396-17184816
				chrIII:7335162-7335582					chrX:8546017-8546437	chrII:6343867-6344287	chrX:17631738-17632158
				chrIII:7376308-7376728					chrX:8810945-8811365	chrII:6355673-6356093
				chrIII:7465241-7465661					chrX:9103008-9103428	chrII:6377522-6377942
				chrIII:7499375-7499795					chrX:9296592-9297012	chrII:6383160-6383580
				chrIII:7520572-7520992					chrX:9347539-9347959	chrII:6489771-6490191
				chrIII:7572827-7573247					chrX:9441491-9441911	chrII:6491733-6492153
				chrIII:7641893-7642313					chrX:10148211-10148631	chrII:6565034-6565454
				chrIII:7659323-7659743					chrX:10372646-10373066	chrII:6609408-6609828
				chrIII:7770913-7771333					chrX:10524481-10524901	chrII:6620680-6621100
				chrIII:7835536-7835956					chrX:10555480-10555900	chrII:6741417-6741837
				chrIII:7838838-7839258					chrX:10568693-10569113	chrII:6832712-6833132
				chrIII:7851824-7852244					chrX:10766230-10766650	chrII:6842518-6842938
				chrIII:7854425-7854845					chrX:10900049-10900469	chrII:6858857-6859277
				chrIII:7940758-7941178					chrX:11206968-11207388	chrII:6891132-6891552
				chrIII:8020839-8021259					chrX:11262331-11262751	chrII:6926445-6926865
				chrIII:8121871-8122291					chrX:11414770-11415190	chrII:6934763-6935183
				chrIII:8307267-8307687					chrX:11465244-11465664	chrII:7030217-7030637
				chrIII:8432046-8432466					chrX:11522091-11522511	chrII:7031311-7031731
				chrIII:8446879-8447299					chrX:11546549-11546969	chrII:7050135-7050555
				chrIII:8683575-8683995					chrX:11757732-11758152	chrII:7060114-7060534
				chrIII:8741339-8741759					chrX:11937325-11937745	chrII:7104976-7105396
				chrIII:8767819-8768239					chrX:11947053-11947473	chrII:7139042-7139462
				chrIII:8781937-8782357					chrX:11948236-11948656	chrII:7183486-7183906
				chrIII:8847621-8848041					chrX:12017938-12018358	chrII:7183915-7184335
				chrIII:8888854-8889274					chrX:12350169-12350589	chrII:7195985-7196405
				chrIII:8899647-8900067					chrX:12393784-12394204	chrII:7232517-7232937
				chrIII:8903990-8904410					chrX:12670430-12670850	chrII:7253086-7253506
				chrIII:8956178-8956598					chrX:12975614-12976034	chrII:7286243-7286663
				chrIII:8984898-8985318					chrX:12989227-12989647	chrII:7340675-7341095
				chrIII:8985776-8986196					chrX:13056697-13057117	chrII:7393546-7393966
				chrIII:9051202-9051622					chrX:13121147-13121567	chrII:7478619-7479039
				chrIII:9052534-9052954					chrX:13353588-13354008	chrII:7557961-7558381
				chrIII:9053790-9054210					chrX:13527248-13527668	chrII:7662253-7662673
				chrIII:9154721-9155141					chrX:13669627-13670047	chrII:7758405-7758825
				chrIII:9238962-9239382					chrX:13969573-13969993	chrII:7771108-7771528
				chrIII:9309729-9310149					chrX:14146831-14147251	chrII:7791266-7791686
				chrIII:9390111-9390531					chrX:14813348-14813768	chrII:7816159-7816579
				chrIII:9390891-9391311					chrX:14841037-14841457	chrII:7870614-7871034
				chrIII:9465367-9465787					chrX:14853763-14854183	chrII:7891364-7891784
				chrIII:9466999-9467419					chrX:15040668-15041088	chrII:8086791-8087211
				chrIII:9580368-9580788					chrX:15276682-15277102	chrII:8125419-8125839
				chrIII:9585191-9585611					chrX:15507963-15508383	chrII:8131313-8131733
				chrIII:9611965-9612385					chrX:15606830-15607250	chrII:8157990-8158410
				chrIII:9619020-9619440					chrX:15879629-15880049	chrII:8162245-8162665
				chrIII:9619220-9619640					chrX:16147743-16148163	chrII:8184998-8185418
				chrIII:9631193-9631613					chrX:16209653-16210073	chrII:8205552-8205972
				chrIII:9667860-9668280					chrX:16447089-16447509	chrII:8216361-8216781
				chrIII:9697155-9697575					chrX:16590798-16591218	chrII:8328921-8329341
				chrIII:9750688-9751108					chrX:16602408-16602828	chrII:8464498-8464918
				chrIII:9765319-9765739					chrX:16619776-16620196	chrII:8483160-8483580
				chrIII:9808093-9808513					chrX:16634677-16635097	chrII:8514698-8515118
				chrIII:9868015-9868435					chrX:16704048-16704468	chrII:8516765-8517185
				chrIII:10022635-10023055					chrX:16814011-16814431	chrII:8538949-8539369
				chrIII:10035661-10036081					chrX:17184377-17184797	chrII:8546953-8547373
				chrIII:10036947-10037367						chrII:8561239-8561659
				chrIII:10151667-10152087						chrII:8661513-8661933
				chrIII:10187824-10188244						chrII:8684274-8684694
				chrIII:10261411-10261831						chrII:8738894-8739314
				chrIII:10318673-10319093						chrII:8745955-8746375
				chrIII:10505065-10505485						chrII:8787363-8787783
				chrIII:10599593-10600013						chrII:8810995-8811415
				chrIII:10612718-10613138						chrII:8918449-8918869
				chrIII:10621101-10621521						chrII:8920283-8920703
				chrIII:10632462-10632882						chrII:9057259-9057679
				chrIII:10633942-10634362						chrII:9060267-9060687
				chrIII:10720039-10720459						chrII:9061793-9062213
				chrIII:10762035-10762455						chrII:9063373-9063793
				chrIII:10848718-10849138						chrII:9098992-9099412
				chrIII:10856713-10857133						chrII:9116344-9116764
				chrIII:10857282-10857702						chrII:9125128-9125548
				chrIII:10989310-10989730						chrII:9128057-9128477
				chrIII:11039108-11039528						chrII:9196300-9196720
				chrIII:11119149-11119569						chrII:9226455-9226875
				chrIII:11202927-11203347						chrII:9273952-9274372
				chrIII:11243219-11243639						chrII:9284884-9285304
				chrIII:11285955-11286375						chrII:9291612-9292032
				chrIII:11290445-11290865						chrII:9301035-9301455
				chrIII:11316959-11317379						chrII:9356656-9357076
				chrIII:11682566-11682986						chrII:9481389-9481809
				chrIII:11694124-11694544						chrII:9500904-9501324
				chrIII:11694965-11695385						chrII:9601650-9602070
				chrIII:11825540-11825960						chrII:9621065-9621485
				chrIII:11869893-11870313						chrII:9668962-9669382
				chrIII:11946243-11946663						chrII:9730431-9730851
				chrIII:11981333-11981753						chrII:9738808-9739228
				chrIII:12058334-12058754						chrII:9800232-9800652
				chrIII:12202253-12202673						chrII:9891345-9891765
				chrIII:12250097-12250517						chrII:9974208-9974628
				chrIII:12273481-12273901						chrII:10015931-10016351
				chrIII:12568152-12568572						chrII:10028255-10028675
				chrIII:12598925-12599345						chrII:10099895-10100315
				chrIII:12615006-12615426						chrII:10136742-10137162
				chrIII:12615626-12616046						chrII:10172443-10172863
				chrIII:12665381-12665801						chrII:10221654-10222074
				chrIII:12673244-12673664						chrII:10303728-10304148
				chrIII:12844682-12845102						chrII:10357639-10358059
				chrIII:12858403-12858823						chrII:10382288-10382708
				chrIII:12874586-12875006						chrII:10389122-10389542
				chrIII:13062492-13062912						chrII:10395377-10395797
				chrIII:13187646-13188066						chrII:10501420-10501840
				chrIII:13348646-13349066						chrII:10502676-10503096
				chrIII:13370830-13371250						chrII:10543844-10544264
				chrIII:13423298-13423718						chrII:10551955-10552375
				chrIII:13462813-13463233						chrII:10553072-10553492
				chrIII:13466114-13466534						chrII:10557218-10557638
				chrIII:13529928-13530348						chrII:10558710-10559130
				chrIII:13716754-13717174						chrII:10559723-10560143
				chrIII:13717423-13717843						chrII:10563367-10563787
				chrIV:257120-257540						chrII:10653544-10653964
				chrIV:366279-366699						chrII:10658694-10659114
				chrIV:424995-425415						chrII:10798457-10798877
				chrIV:620312-620732						chrII:10820001-10820421
				chrIV:657892-658312						chrII:10820652-10821072
				chrIV:658485-658905						chrII:10840066-10840486
				chrIV:935668-936088						chrII:10860826-10861246
				chrIV:1070412-1070832						chrII:10988573-10988993
				chrIV:1168476-1168896						chrII:11097344-11097764
				chrIV:1659046-1659466						chrII:11126372-11126792
				chrIV:1710968-1711388						chrII:11150957-11151377
				chrIV:1826736-1827156						chrII:11157668-11158088
				chrIV:2077851-2078271						chrII:11177604-11178024
				chrIV:2195623-2196043						chrII:11236265-11236685
				chrIV:2212781-2213201						chrII:11501346-11501766
				chrIV:2220132-2220552						chrII:11547205-11547625
				chrIV:2388949-2389369						chrII:11555684-11556104
				chrIV:2599615-2600035						chrII:11561661-11562081
				chrIV:2725788-2726208						chrII:11612030-11612450
				chrIV:2734609-2735029						chrII:11619991-11620411
				chrIV:2998666-2999086						chrII:11632681-11633101
				chrIV:3050472-3050892						chrII:11635029-11635449
				chrIV:3134964-3135384						chrII:11711707-11712127
				chrIV:3184119-3184539						chrII:11759267-11759687
				chrIV:3197300-3197720						chrII:11788046-11788466
				chrIV:3250030-3250450						chrII:11889388-11889808
				chrIV:3294540-3294960						chrII:11904798-11905218
				chrIV:3385205-3385625						chrII:11959193-11959613
				chrIV:3399009-3399429						chrII:11979680-11980100
				chrIV:3515634-3516054						chrII:11980105-11980525
				chrIV:3519416-3519836						chrII:12006685-12007105
				chrIV:3552059-3552479						chrII:12041168-12041588
				chrIV:3725835-3726255						chrII:12041994-12042414
				chrIV:3742418-3742838						chrII:12042506-12042926
				chrIV:3774168-3774588						chrII:12063082-12063502
				chrIV:3800516-3800936						chrII:12064683-12065103
				chrIV:3832007-3832427						chrII:12089656-12090076
				chrIV:4034867-4035287						chrII:12107790-12108210
				chrIV:4042245-4042665						chrII:12224905-12225325
				chrIV:4171735-4172155						chrII:12279302-12279722
				chrIV:4225896-4226316						chrII:12341570-12341990
				chrIV:4445678-4446098						chrII:12349856-12350276
				chrIV:4513459-4513879						chrII:12352187-12352607
				chrIV:4570525-4570945						chrII:12425847-12426267
				chrIV:4611844-4612264						chrII:12603674-12604094
				chrIV:4660299-4660719						chrII:12679614-12680034
				chrIV:4660505-4660925						chrII:12798758-12799178
				chrIV:4810336-4810756						chrII:12878633-12879053
				chrIV:4953827-4954247						chrII:12953326-12953746
				chrIV:5105936-5106356						chrII:12982145-12982565
				chrIV:5364104-5364524						chrII:13004815-13005235
				chrIV:5394673-5395093						chrII:13026711-13027131
				chrIV:5595544-5595964						chrII:13036666-13037086
				chrIV:5604362-5604782						chrII:13189407-13189827
				chrIV:5657234-5657654						chrII:13199638-13200058
				chrIV:5658191-5658611						chrII:13284164-13284584
				chrIV:5753782-5754202						chrII:13291349-13291769
				chrIV:5903921-5904341						chrII:13335304-13335724
				chrIV:5966969-5967389						chrII:13456612-13457032
				chrIV:6284656-6285076						chrII:13460731-13461151
				chrIV:6298333-6298753						chrII:13465387-13465807
				chrIV:6322412-6322832						chrII:13494743-13495163
				chrIV:6376520-6376940						chrII:13575512-13575932
				chrIV:6548555-6548975						chrII:13670872-13671292
				chrIV:6785808-6786228						chrII:13751212-13751632
				chrIV:6879761-6880181						chrII:13795791-13796211
				chrIV:7045371-7045791						chrII:13796717-13797137
				chrIV:7084729-7085149						chrII:13813943-13814363
				chrIV:7144858-7145278						chrII:13834801-13835221
				chrIV:7156336-7156756						chrII:13842555-13842975
				chrIV:7381962-7382382						chrII:13976148-13976568
				chrIV:7508059-7508479						chrII:14040270-14040690
				chrIV:7611350-7611770						chrII:14040269-14040689
				chrIV:7619308-7619728						chrII:14043197-14043617
				chrIV:7902465-7902885						chrII:14049081-14049501
				chrIV:8015784-8016204						chrII:14050411-14050831
				chrIV:8070756-8071176						chrII:14154339-14154759
				chrIV:8136080-8136500						chrII:14251340-14251760
				chrIV:8230141-8230561						chrII:14251645-14252065
				chrIV:8375339-8375759						chrII:14290837-14291257
				chrIV:8444143-8444563						chrII:14311505-14311925
				chrIV:8620076-8620496						chrII:14390005-14390425
				chrIV:8629620-8630040						chrII:14405152-14405572
				chrIV:8630310-8630730						chrII:14482525-14482945
				chrIV:8681892-8682312						chrII:14496853-14497273
				chrIV:8697264-8697684						chrII:14528369-14528789
				chrIV:8795024-8795444						chrII:14754228-14754648
				chrIV:8830699-8831119						chrII:14810564-14810984
				chrIV:8921064-8921484						chrII:15089438-15089858
				chrIV:9053383-9053803						chrII:15190038-15190458
				chrIV:9196736-9197156						chrII:15195262-15195682
				chrIV:9216466-9216886						chrII:15203563-15203983
				chrIV:9244149-9244569						chrII:15213956-15214376
				chrIV:9469254-9469674						chrII:15232703-15233123
				chrIV:9477494-9477914						chrII:15271693-15272113
				chrIV:9510449-9510869						chrIII:2885-3305
				chrIV:9667336-9667756						chrIII:89167-89587
				chrIV:9673668-9674088						chrIII:343627-344047
				chrIV:9718322-9718742						chrIII:423869-424289
				chrIV:9725448-9725868						chrIII:471723-472143
				chrIV:9783505-9783925						chrIII:502623-503043
				chrIV:9878864-9879284						chrIII:563761-564181
				chrIV:10331714-10332134						chrIII:622713-623133
				chrIV:10395068-10395488						chrIII:640402-640822
				chrIV:10434991-10435411						chrIII:740178-740598
				chrIV:10504780-10505200						chrIII:767301-767721
				chrIV:10721027-10721447						chrIII:939748-940168
				chrIV:10731499-10731919						chrIII:952151-952571
				chrIV:10773285-10773705						chrIII:1080551-1080971
				chrIV:10933043-10933463						chrIII:1142783-1143203
				chrIV:10936815-10937235						chrIII:1202148-1202568
				chrIV:11020846-11021266						chrIII:1223639-1224059
				chrIV:11036188-11036608						chrIII:1228576-1228996
				chrIV:11082765-11083185						chrIII:1235736-1236156
				chrIV:11111195-11111615						chrIII:1308184-1308604
				chrIV:11149563-11149983						chrIII:1392744-1393164
				chrIV:11347251-11347671						chrIII:1401476-1401896
				chrIV:11425253-11425673						chrIII:1418690-1419110
				chrIV:11473972-11474392						chrIII:1533076-1533496
				chrIV:11480351-11480771						chrIII:1533560-1533980
				chrIV:11543010-11543430						chrIII:1540148-1540568
				chrIV:11549630-11550050						chrIII:1601718-1602138
				chrIV:11566112-11566532						chrIII:1602685-1603105
				chrIV:11744041-11744461						chrIII:1677450-1677870
				chrIV:11821836-11822256						chrIII:1698820-1699240
				chrIV:11822099-11822519						chrIII:1859528-1859948
				chrIV:11867815-11868235						chrIII:2099732-2100152
				chrIV:12268318-12268738						chrIII:2310952-2311372
				chrIV:12653068-12653488						chrIII:2375878-2376298
				chrIV:12830906-12831326						chrIII:2507922-2508342
				chrIV:13015974-13016394						chrIII:2578557-2578977
				chrIV:13020991-13021411						chrIII:2756398-2756818
				chrIV:13041815-13042235						chrIII:2804500-2804920
				chrIV:13231345-13231765						chrIII:2814981-2815401
				chrIV:13240444-13240864						chrIII:2869479-2869899
				chrIV:13777469-13777889						chrIII:2870210-2870630
				chrIV:14046777-14047197						chrIII:3036008-3036428
				chrIV:14070881-14071301						chrIII:3065805-3066225
				chrIV:14128213-14128633						chrIII:3127668-3128088
				chrIV:14260651-14261071						chrIII:3174956-3175376
				chrIV:14326964-14327384						chrIII:3279225-3279645
				chrIV:14464039-14464459						chrIII:3307415-3307835
				chrIV:14557607-14558027						chrIII:3308901-3309321
				chrIV:14614423-14614843						chrIII:3323927-3324347
				chrIV:14836850-14837270						chrIII:3343497-3343917
				chrIV:14959447-14959867						chrIII:3404404-3404824
				chrIV:15039480-15039900						chrIII:3460050-3460470
				chrIV:15814025-15814445						chrIII:3540382-3540802
				chrIV:15908205-15908625						chrIII:3546785-3547205
				chrIV:16382193-16382613						chrIII:3605700-3606120
				chrIV:16656186-16656606						chrIII:3619598-3620018
				chrIV:16663537-16663957						chrIII:3630348-3630768
				chrIV:16845297-16845717						chrIII:3664226-3664646
				chrIV:16946722-16947142						chrIII:3670824-3671244
				chrIV:17084247-17084667						chrIII:3766785-3767205
				chrIV:17280249-17280669						chrIII:3843881-3844301
				chrIV:17301807-17302227						chrIII:3867362-3867782
				chrIV:17307717-17308137						chrIII:3879234-3879654
				chrIV:17384303-17384723						chrIII:3951976-3952396
				chrIV:17399338-17399758						chrIII:3954133-3954553
				chrIV:17412448-17412868						chrIII:3974203-3974623
				chrIV:17416669-17417089						chrIII:3983923-3984343
				chrV:156350-156770						chrIII:4015596-4016016
				chrV:396308-396728						chrIII:4086540-4086960
				chrV:477735-478155						chrIII:4088346-4088766
				chrV:1003707-1004127						chrIII:4170994-4171414
				chrV:1113282-1113702						chrIII:4196571-4196991
				chrV:1197191-1197611						chrIII:4237718-4238138
				chrV:1287146-1287566						chrIII:4240113-4240533
				chrV:1300576-1300996						chrIII:4280403-4280823
				chrV:1311508-1311928						chrIII:4332546-4332966
				chrV:1367227-1367647						chrIII:4378890-4379310
				chrV:1398310-1398730						chrIII:4412087-4412507
				chrV:1466892-1467312						chrIII:4419310-4419730
				chrV:1654814-1655234						chrIII:4496158-4496578
				chrV:1743436-1743856						chrIII:4501995-4502415
				chrV:1871744-1872164						chrIII:4503612-4504032
				chrV:1895408-1895828						chrIII:4504303-4504723
				chrV:1945843-1946263						chrIII:4513892-4514312
				chrV:2021265-2021685						chrIII:4574758-4575178
				chrV:2303823-2304243						chrIII:4666722-4667142
				chrV:2600530-2600950						chrIII:4756961-4757381
				chrV:2738169-2738589						chrIII:4785713-4786133
				chrV:3005954-3006374						chrIII:4883435-4883855
				chrV:3042478-3042898						chrIII:4899711-4900131
				chrV:3128241-3128661						chrIII:4917937-4918357
				chrV:3703852-3704272						chrIII:4930262-4930682
				chrV:3833527-3833947						chrIII:4934862-4935282
				chrV:3874351-3874771						chrIII:5024354-5024774
				chrV:3877186-3877606						chrIII:5025096-5025516
				chrV:4072295-4072715						chrIII:5031408-5031828
				chrV:4319786-4320206						chrIII:5162784-5163204
				chrV:4680548-4680968						chrIII:5201249-5201669
				chrV:4794274-4794694						chrIII:5211185-5211605
				chrV:4796921-4797341						chrIII:5224881-5225301
				chrV:4870602-4871022						chrIII:5227934-5228354
				chrV:4966091-4966511						chrIII:5233128-5233548
				chrV:5269008-5269428						chrIII:5274953-5275373
				chrV:5642845-5643265						chrIII:5305656-5306076
				chrV:5651889-5652309						chrIII:5308234-5308654
				chrV:5684531-5684951						chrIII:5405593-5406013
				chrV:5737465-5737885						chrIII:5417846-5418266
				chrV:5739428-5739848						chrIII:5418850-5419270
				chrV:5776854-5777274						chrIII:5442803-5443223
				chrV:5845093-5845513						chrIII:5449887-5450307
				chrV:6004586-6005006						chrIII:5506259-5506679
				chrV:6031543-6031963						chrIII:5552291-5552711
				chrV:6043805-6044225						chrIII:5552932-5553352
				chrV:6100586-6101006						chrIII:5591769-5592189
				chrV:6629624-6630044						chrIII:5602026-5602446
				chrV:6658702-6659122						chrIII:5603622-5604042
				chrV:6659786-6660206						chrIII:5621217-5621637
				chrV:6764887-6765307						chrIII:5686344-5686764
				chrV:6777566-6777986						chrIII:5698323-5698743
				chrV:6780678-6781098						chrIII:5711180-5711600
				chrV:6785078-6785498						chrIII:5721851-5722271
				chrV:6893056-6893476						chrIII:5810774-5811194
				chrV:6989512-6989932						chrIII:5864234-5864654
				chrV:6997937-6998357						chrIII:5869380-5869800
				chrV:7060309-7060729						chrIII:5871733-5872153
				chrV:7084700-7085120						chrIII:5892889-5893309
				chrV:7196423-7196843						chrIII:5917290-5917710
				chrV:7465494-7465914						chrIII:5938737-5939157
				chrV:7591171-7591591						chrIII:5951308-5951728
				chrV:7664273-7664693						chrIII:5959042-5959462
				chrV:7734892-7735312						chrIII:5964320-5964740
				chrV:7819608-7820028						chrIII:5965183-5965603
				chrV:7899429-7899849						chrIII:5981448-5981868
				chrV:7946055-7946475						chrIII:5983077-5983497
				chrV:8000865-8001285						chrIII:5990202-5990622
				chrV:8162135-8162555						chrIII:6078042-6078462
				chrV:8211927-8212347						chrIII:6158578-6158998
				chrV:8250335-8250755						chrIII:6159169-6159589
				chrV:8500325-8500745						chrIII:6180301-6180721
				chrV:8500993-8501413						chrIII:6206240-6206660
				chrV:8507359-8507779						chrIII:6278399-6278819
				chrV:9033556-9033976						chrIII:6339420-6339840
				chrV:9099203-9099623						chrIII:6344703-6345123
				chrV:9193940-9194360						chrIII:6361470-6361890
				chrV:9292192-9292612						chrIII:6367671-6368091
				chrV:9503311-9503731						chrIII:6396222-6396642
				chrV:9546762-9547182						chrIII:6444340-6444760
				chrV:9606474-9606894						chrIII:6463957-6464377
				chrV:9704969-9705389						chrIII:6857435-6857855
				chrV:9901095-9901515						chrIII:6888470-6888890
				chrV:9970085-9970505						chrIII:6897607-6898027
				chrV:9972794-9973214						chrIII:6971882-6972302
				chrV:10019902-10020322						chrIII:7068623-7069043
				chrV:10238626-10239046						chrIII:7087903-7088323
				chrV:10361767-10362187						chrIII:7116609-7117029
				chrV:10578875-10579295						chrIII:7141166-7141586
				chrV:10708340-10708760						chrIII:7155718-7156138
				chrV:10736701-10737121						chrIII:7162313-7162733
				chrV:10857407-10857827						chrIII:7179635-7180055
				chrV:10860454-10860874						chrIII:7183998-7184418
				chrV:10862669-10863089						chrIII:7189724-7190144
				chrV:10867607-10868027						chrIII:7272092-7272512
				chrV:10873610-10874030						chrIII:7281162-7281582
				chrV:10894572-10894992						chrIII:7335222-7335642
				chrV:10929316-10929736						chrIII:7387258-7387678
				chrV:11012264-11012684						chrIII:7453654-7454074
				chrV:11078329-11078749						chrIII:7499445-7499865
				chrV:11123915-11124335						chrIII:7520649-7521069
				chrV:11197830-11198250						chrIII:7572889-7573309
				chrV:11211292-11211712						chrIII:7726326-7726746
				chrV:11326945-11327365						chrIII:7728447-7728867
				chrV:11521416-11521836						chrIII:7729591-7730011
				chrV:11545274-11545694						chrIII:7765988-7766408
				chrV:11546705-11547125						chrIII:7769933-7770353
				chrV:11548891-11549311						chrIII:7771012-7771432
				chrV:11721731-11722151						chrIII:7854474-7854894
				chrV:11804540-11804960						chrIII:7911602-7912022
				chrV:11854941-11855361						chrIII:7925311-7925731
				chrV:11927241-11927661						chrIII:7925977-7926397
				chrV:11933375-11933795						chrIII:7928535-7928955
				chrV:11979834-11980254						chrIII:7940804-7941224
				chrV:11993654-11994074						chrIII:7978734-7979154
				chrV:12026807-12027227						chrIII:8029487-8029907
				chrV:12028117-12028537						chrIII:8124388-8124808
				chrV:12030592-12031012						chrIII:8125281-8125701
				chrV:12291576-12291996						chrIII:8224741-8225161
				chrV:12564940-12565360						chrIII:8268264-8268684
				chrV:12981805-12982225						chrIII:8291651-8292071
				chrV:13082529-13082949						chrIII:8299701-8300121
				chrV:13261192-13261612						chrIII:8307344-8307764
				chrV:13313021-13313441						chrIII:8370899-8371319
				chrV:13517373-13517793						chrIII:8413385-8413805
				chrV:13551595-13552015						chrIII:8417190-8417610
				chrV:13556619-13557039						chrIII:8432139-8432559
				chrV:13658552-13658972						chrIII:8446947-8447367
				chrV:13715241-13715661						chrIII:8506332-8506752
				chrV:13789352-13789772						chrIII:8719723-8720143
				chrV:13909411-13909831						chrIII:8733264-8733684
				chrV:14012074-14012494						chrIII:8741449-8741869
				chrV:14055001-14055421						chrIII:8759993-8760413
				chrV:14317626-14318046						chrIII:8767884-8768304
				chrV:14347186-14347606						chrIII:8782802-8783222
				chrV:14366481-14366901						chrIII:8797389-8797809
				chrV:14423219-14423639						chrIII:8847741-8848161
				chrV:14545860-14546280						chrIII:8888982-8889402
				chrV:14688849-14689269						chrIII:8899690-8900110
				chrV:14849561-14849981						chrIII:8904087-8904507
				chrV:14929111-14929531						chrIII:8956235-8956655
				chrV:14935101-14935521						chrIII:8998263-8998683
				chrV:14980061-14980481						chrIII:9051263-9051683
				chrV:15065367-15065787						chrIII:9053848-9054268
				chrV:15136740-15137160						chrIII:9060152-9060572
				chrV:15511579-15511999						chrIII:9288551-9288971
				chrV:15553837-15554257						chrIII:9326534-9326954
				chrV:15610338-15610758						chrIII:9331091-9331511
				chrV:15650034-15650454						chrIII:9452892-9453312
				chrV:16000402-16000822						chrIII:9465429-9465849
				chrV:16401498-16401918						chrIII:9467074-9467494
				chrV:17674343-17674763						chrIII:9523558-9523978
				chrV:17921387-17921807						chrIII:9528825-9529245
				chrV:17951164-17951584						chrIII:9538722-9539142
				chrV:18069067-18069487						chrIII:9545973-9546393
				chrV:18533599-18534019						chrIII:9616397-9616817
				chrV:18846571-18846991						chrIII:9619096-9619516
				chrV:18967611-18968031						chrIII:9631286-9631706
				chrV:19529104-19529524						chrIII:9638328-9638748
				chrV:19582186-19582606						chrIII:9656196-9656616
				chrV:19601815-19602235						chrIII:9717202-9717622
				chrV:19643866-19644286						chrIII:9721986-9722406
				chrV:19668171-19668591						chrIII:9735866-9736286
				chrV:20005667-20006087						chrIII:9765428-9765848
				chrV:20139267-20139687						chrIII:9808118-9808538
				chrV:20424726-20425146						chrIII:9857094-9857514
				chrV:20580482-20580902						chrIII:9868064-9868484
				chrV:20782143-20782563						chrIII:9913711-9914131
				chrX:481110-481530						chrIII:9922305-9922725
				chrX:625298-625718						chrIII:9930289-9930709
				chrX:693458-693878						chrIII:9950184-9950604
				chrX:763367-763787						chrIII:9956661-9957081
				chrX:844654-845074						chrIII:10153755-10154175
				chrX:880401-880821						chrIII:10203185-10203605
				chrX:1021799-1022219						chrIII:10214534-10214954
				chrX:1299846-1300266						chrIII:10216928-10217348
				chrX:1319695-1320115						chrIII:10314221-10314641
				chrX:1437132-1437552						chrIII:10318739-10319159
				chrX:1446780-1447200						chrIII:10378881-10379301
				chrX:1454317-1454737						chrIII:10396038-10396458
				chrX:1815496-1815916						chrIII:10415800-10416220
				chrX:1897033-1897453						chrIII:10461117-10461537
				chrX:2082942-2083362						chrIII:10481535-10481955
				chrX:2144225-2144645						chrIII:10505179-10505599
				chrX:2237430-2237850						chrIII:10599669-10600089
				chrX:2382210-2382630						chrIII:10621225-10621645
				chrX:2506724-2507144						chrIII:10629804-10630224
				chrX:2572596-2573016						chrIII:10637758-10638178
				chrX:2632185-2632605						chrIII:10656031-10656451
				chrX:2667807-2668227						chrIII:10662566-10662986
				chrX:2688484-2688904						chrIII:10718928-10719348
				chrX:2983972-2984392						chrIII:10720127-10720547
				chrX:2996935-2997355						chrIII:10848804-10849224
				chrX:3102863-3103283						chrIII:10989418-10989838
				chrX:3111188-3111608						chrIII:11119266-11119686
				chrX:3145339-3145759						chrIII:11243411-11243831
				chrX:3339805-3340225						chrIII:11244361-11244781
				chrX:3449052-3449472						chrIII:11290554-11290974
				chrX:3583414-3583834						chrIII:11443243-11443663
				chrX:3668842-3669262						chrIII:11463683-11464103
				chrX:3697526-3697946						chrIII:11466837-11467257
				chrX:3893979-3894399						chrIII:11660675-11661095
				chrX:3944027-3944447						chrIII:11684724-11685144
				chrX:4137790-4138210						chrIII:11719507-11719927
				chrX:4142554-4142974						chrIII:11729387-11729807
				chrX:4143327-4143747						chrIII:11822380-11822800
				chrX:4209053-4209473						chrIII:11825652-11826072
				chrX:4260285-4260705						chrIII:11870000-11870420
				chrX:4469268-4469688						chrIII:11881559-11881979
				chrX:4523898-4524318						chrIII:11946325-11946745
				chrX:4533188-4533608						chrIII:11974403-11974823
				chrX:4625055-4625475						chrIII:12009620-12010040
				chrX:4635601-4636021						chrIII:12058401-12058821
				chrX:4699562-4699982						chrIII:12135574-12135994
				chrX:4982566-4982986						chrIII:12149690-12150110
				chrX:5022624-5023044						chrIII:12151059-12151479
				chrX:5085469-5085889						chrIII:12250205-12250625
				chrX:5122642-5123062						chrIII:12273575-12273995
				chrX:5152872-5153292						chrIII:12333866-12334286
				chrX:5174193-5174613						chrIII:12377261-12377681
				chrX:5291044-5291464						chrIII:12421443-12421863
				chrX:5298133-5298553						chrIII:12424076-12424496
				chrX:5363776-5364196						chrIII:12453258-12453678
				chrX:5552551-5552971						chrIII:12456096-12456516
				chrX:5707775-5708195						chrIII:12548421-12548841
				chrX:5768592-5769012						chrIII:12568297-12568717
				chrX:5770648-5771068						chrIII:12575798-12576218
				chrX:5811885-5812305						chrIII:12612449-12612869
				chrX:5841089-5841509						chrIII:12673344-12673764
				chrX:6245494-6245914						chrIII:12687995-12688415
				chrX:6252044-6252464						chrIII:12713808-12714228
				chrX:6253740-6254160						chrIII:12833895-12834315
				chrX:6353727-6354147						chrIII:12874675-12875095
				chrX:6371083-6371503						chrIII:12906631-12907051
				chrX:6639704-6640124						chrIII:12934357-12934777
				chrX:7128555-7128975						chrIII:12967649-12968069
				chrX:7212399-7212819						chrIII:12978779-12979199
				chrX:7232969-7233389						chrIII:13062530-13062950
				chrX:7370859-7371279						chrIII:13071357-13071777
				chrX:7446428-7446848						chrIII:13105521-13105941
				chrX:7478553-7478973						chrIII:13152652-13153072
				chrX:7653827-7654247						chrIII:13187739-13188159
				chrX:7782362-7782782						chrIII:13208953-13209373
				chrX:7809492-7809912						chrIII:13296528-13296948
				chrX:7890636-7891056						chrIII:13313780-13314200
				chrX:7956378-7956798						chrIII:13359822-13360242
				chrX:7977396-7977816						chrIII:13377258-13377678
				chrX:8019603-8020023						chrIII:13423413-13423833
				chrX:8083848-8084268						chrIII:13439416-13439836
				chrX:8140164-8140584						chrIII:13462901-13463321
				chrX:8252253-8252673						chrIII:13466222-13466642
				chrX:8329399-8329819						chrIII:13526180-13526600
				chrX:8440291-8440711						chrIII:13530053-13530473
				chrX:8532055-8532475						chrIII:13530843-13531263
				chrX:8545947-8546367						chrIII:13607830-13608250
				chrX:8556540-8556960						chrIII:13643526-13643946
				chrX:8591731-8592151						chrIII:13710319-13710739
				chrX:8730800-8731220						chrIII:13717510-13717930
				chrX:8939973-8940393						chrIII:13718393-13718813
				chrX:8957930-8958350						chrIII:13732155-13732575
				chrX:8963412-8963832						chrIII:13732657-13733077
				chrX:9372991-9373411						chrIII:13768300-13768720
				chrX:9436830-9437250						chrIV:78222-78642
				chrX:9549902-9550322						chrIV:81423-81843
				chrX:9629493-9629913						chrIV:130159-130579
				chrX:9642503-9642923						chrIV:182452-182872
				chrX:9737743-9738163						chrIV:192021-192441
				chrX:9932228-9932648						chrIV:210606-211026
				chrX:9952149-9952569						chrIV:257108-257528
				chrX:10188552-10188972						chrIV:274093-274513
				chrX:10315989-10316409						chrIV:295768-296188
				chrX:10555372-10555792						chrIV:383342-383762
				chrX:10675312-10675732						chrIV:408973-409393
				chrX:10759538-10759958						chrIV:657894-658314
				chrX:10900000-10900420						chrIV:682918-683338
				chrX:10900883-10901303						chrIV:855460-855880
				chrX:11151426-11151846						chrIV:884692-885112
				chrX:11206880-11207300						chrIV:1054722-1055142
				chrX:11262245-11262665						chrIV:1067497-1067917
				chrX:11278014-11278434						chrIV:1070392-1070812
				chrX:11465205-11465625						chrIV:1147608-1148028
				chrX:11522029-11522449						chrIV:1274746-1275166
				chrX:11546536-11546956						chrIV:1403984-1404404
				chrX:11657973-11658393						chrIV:1456486-1456906
				chrX:11662545-11662965						chrIV:1559917-1560337
				chrX:11731718-11732138						chrIV:1613610-1614030
				chrX:11738466-11738886						chrIV:1655255-1655675
				chrX:11875164-11875584						chrIV:1657610-1658030
				chrX:11937256-11937676						chrIV:1659051-1659471
				chrX:12034539-12034959						chrIV:1738263-1738683
				chrX:12040244-12040664						chrIV:1745613-1746033
				chrX:12080507-12080927						chrIV:1859406-1859826
				chrX:12149507-12149927						chrIV:1881800-1882220
				chrX:12393753-12394173						chrIV:1923681-1924101
				chrX:12454215-12454635						chrIV:2162229-2162649
				chrX:12510125-12510545						chrIV:2168496-2168916
				chrX:12536550-12536970						chrIV:2220130-2220550
				chrX:12664918-12665338						chrIV:2281415-2281835
				chrX:12668855-12669275						chrIV:2388929-2389349
				chrX:12876813-12877233						chrIV:2599624-2600044
				chrX:12911144-12911564						chrIV:2603721-2604141
				chrX:12951040-12951460						chrIV:2725780-2726200
				chrX:12975552-12975972						chrIV:2796687-2797107
				chrX:13040425-13040845						chrIV:2841299-2841719
				chrX:13047647-13048067						chrIV:3050253-3050673
				chrX:13104826-13105246						chrIV:3050478-3050898
				chrX:13121067-13121487						chrIV:3158158-3158578
				chrX:13144156-13144576						chrIV:3232658-3233078
				chrX:13180072-13180492						chrIV:3294526-3294946
				chrX:13181920-13182340						chrIV:3298678-3299098
				chrX:13253033-13253453						chrIV:3385234-3385654
				chrX:13306797-13307217						chrIV:3386832-3387252
				chrX:13347191-13347611						chrIV:3515588-3516008
				chrX:13377776-13378196						chrIV:3599120-3599540
				chrX:13399101-13399521						chrIV:3725832-3726252
				chrX:13402422-13402842						chrIV:3813972-3814392
				chrX:13499850-13500270						chrIV:3875246-3875666
				chrX:13562824-13563244						chrIV:4028094-4028514
				chrX:13595884-13596304						chrIV:4034863-4035283
				chrX:13813774-13814194						chrIV:4042247-4042667
				chrX:13956992-13957412						chrIV:4214334-4214754
				chrX:14185580-14186000						chrIV:4393968-4394388
				chrX:14364917-14365337						chrIV:4445686-4446106
				chrX:14562186-14562606						chrIV:4449768-4450188
				chrX:14589020-14589440						chrIV:4486668-4487088
				chrX:14610257-14610677						chrIV:4511513-4511933
				chrX:14636549-14636969						chrIV:4513497-4513917
				chrX:14663848-14664268						chrIV:4544168-4544588
				chrX:14708103-14708523						chrIV:4660254-4660674
				chrX:14719872-14720292						chrIV:4712387-4712807
				chrX:14813270-14813690						chrIV:4849294-4849714
				chrX:14838245-14838665						chrIV:5077910-5078330
				chrX:14841001-14841421						chrIV:5083007-5083427
				chrX:14970222-14970642						chrIV:5202527-5202947
				chrX:15040635-15041055						chrIV:5364129-5364549
				chrX:15184981-15185401						chrIV:5393573-5393993
				chrX:15545406-15545826						chrIV:5394688-5395108
				chrX:15606781-15607201						chrIV:5548876-5549296
				chrX:15630622-15631042						chrIV:5565065-5565485
				chrX:15664366-15664786						chrIV:5580894-5581314
				chrX:15664666-15665086						chrIV:5593892-5594312
				chrX:15700622-15701042						chrIV:5598485-5598905
				chrX:15736394-15736814						chrIV:5600299-5600719
				chrX:15804051-15804471						chrIV:5603258-5603678
				chrX:16130989-16131409						chrIV:5610417-5610837
				chrX:16254995-16255415						chrIV:5649089-5649509
				chrX:16356651-16357071						chrIV:5666321-5666741
				chrX:16445781-16446201						chrIV:5667089-5667509
				chrX:16541077-16541497						chrIV:5671351-5671771
				chrX:16595572-16595992						chrIV:5754037-5754457
				chrX:16612178-16612598						chrIV:5758460-5758880
				chrX:16634611-16635031						chrIV:5787932-5788352
				chrX:16660136-16660556						chrIV:5817539-5817959
				chrX:16737399-16737819						chrIV:5847354-5847774
				chrX:16872360-16872780						chrIV:6053423-6053843
				chrX:16929467-16929887						chrIV:6097503-6097923
				chrX:17184294-17184714						chrIV:6123834-6124254
				chrX:17338884-17339304						chrIV:6132155-6132575
				chrX:17479712-17480132						chrIV:6279398-6279818
				chrX:17480610-17481030						chrIV:6336726-6337146
				chrX:17545360-17545780						chrIV:6376524-6376944
				chrX:17587972-17588392						chrIV:6431555-6431975
				chrX:17649809-17650229						chrIV:6480950-6481370
										chrIV:6497782-6498202
										chrIV:6502843-6503263
										chrIV:6548604-6549024
										chrIV:6554888-6555308
										chrIV:6556657-6557077
										chrIV:6576692-6577112
										chrIV:6627841-6628261
										chrIV:6785811-6786231
										chrIV:6837551-6837971
										chrIV:6878868-6879288
										chrIV:6910059-6910479
										chrIV:6919318-6919738
										chrIV:7016513-7016933
										chrIV:7084762-7085182
										chrIV:7096766-7097186
										chrIV:7101115-7101535
										chrIV:7237788-7238208
										chrIV:7317804-7318224
										chrIV:7320135-7320555
										chrIV:7391480-7391900
										chrIV:7393665-7394085
										chrIV:7457990-7458410
										chrIV:7507312-7507732
										chrIV:7508092-7508512
										chrIV:7508807-7509227
										chrIV:7553139-7553559
										chrIV:7561759-7562179
										chrIV:7794168-7794588
										chrIV:7830221-7830641
										chrIV:7902472-7902892
										chrIV:7903269-7903689
										chrIV:7924055-7924475
										chrIV:7982030-7982450
										chrIV:8015808-8016228
										chrIV:8050495-8050915
										chrIV:8112626-8113046
										chrIV:8175296-8175716
										chrIV:8193644-8194064
										chrIV:8199770-8200190
										chrIV:8223049-8223469
										chrIV:8228850-8229270
										chrIV:8233274-8233694
										chrIV:8303546-8303966
										chrIV:8333964-8334384
										chrIV:8366306-8366726
										chrIV:8375378-8375798
										chrIV:8376899-8377319
										chrIV:8379299-8379719
										chrIV:8450535-8450955
										chrIV:8453151-8453571
										chrIV:8498702-8499122
										chrIV:8509587-8510007
										chrIV:8526491-8526911
										chrIV:8527621-8528041
										chrIV:8585050-8585470
										chrIV:8589208-8589628
										chrIV:8619184-8619604
										chrIV:8620116-8620536
										chrIV:8660227-8660647
										chrIV:8743920-8744340
										chrIV:8782184-8782604
										chrIV:8795021-8795441
										chrIV:8826576-8826996
										chrIV:8850010-8850430
										chrIV:8865226-8865646
										chrIV:8886014-8886434
										chrIV:8927050-8927470
										chrIV:9040379-9040799
										chrIV:9070157-9070577
										chrIV:9104345-9104765
										chrIV:9146941-9147361
										chrIV:9196772-9197192
										chrIV:9216486-9216906
										chrIV:9316032-9316452
										chrIV:9321053-9321473
										chrIV:9386012-9386432
										chrIV:9440937-9441357
										chrIV:9441427-9441847
										chrIV:9508598-9509018
										chrIV:9511678-9512098
										chrIV:9526023-9526443
										chrIV:9602390-9602810
										chrIV:9651108-9651528
										chrIV:9667051-9667471
										chrIV:9677610-9678030
										chrIV:9699208-9699628
										chrIV:9718411-9718831
										chrIV:9801401-9801821
										chrIV:9854992-9855412
										chrIV:9858095-9858515
										chrIV:9875601-9876021
										chrIV:9995067-9995487
										chrIV:10129002-10129422
										chrIV:10373840-10374260
										chrIV:10420485-10420905
										chrIV:10503868-10504288
										chrIV:10511306-10511726
										chrIV:10543345-10543765
										chrIV:10795607-10796027
										chrIV:10810785-10811205
										chrIV:10858583-10859003
										chrIV:10933078-10933498
										chrIV:10936834-10937254
										chrIV:10964657-10965077
										chrIV:10970304-10970724
										chrIV:10975879-10976299
										chrIV:10981562-10981982
										chrIV:11025817-11026237
										chrIV:11036218-11036638
										chrIV:11111190-11111610
										chrIV:11142404-11142824
										chrIV:11149581-11150001
										chrIV:11247371-11247791
										chrIV:11284015-11284435
										chrIV:11287028-11287448
										chrIV:11287403-11287823
										chrIV:11288971-11289391
										chrIV:11307729-11308149
										chrIV:11310598-11311018
										chrIV:11314885-11315305
										chrIV:11316649-11317069
										chrIV:11433732-11434152
										chrIV:11438261-11438681
										chrIV:11566153-11566573
										chrIV:11583856-11584276
										chrIV:11622323-11622743
										chrIV:11682773-11683193
										chrIV:11807496-11807916
										chrIV:11821911-11822331
										chrIV:11856253-11856673
										chrIV:11957120-11957540
										chrIV:11961624-11962044
										chrIV:12044611-12045031
										chrIV:12051042-12051462
										chrIV:12088916-12089336
										chrIV:12121096-12121516
										chrIV:12156680-12157100
										chrIV:12165315-12165735
										chrIV:12199676-12200096
										chrIV:12201964-12202384
										chrIV:12202817-12203237
										chrIV:12268376-12268796
										chrIV:12334698-12335118
										chrIV:12367230-12367650
										chrIV:12391135-12391555
										chrIV:12527199-12527619
										chrIV:12548204-12548624
										chrIV:12621729-12622149
										chrIV:12840316-12840736
										chrIV:12879503-12879923
										chrIV:13032181-13032601
										chrIV:13039749-13040169
										chrIV:13083092-13083512
										chrIV:13169413-13169833
										chrIV:13231395-13231815
										chrIV:13240483-13240903
										chrIV:13297719-13298139
										chrIV:13386046-13386466
										chrIV:13609791-13610211
										chrIV:13619184-13619604
										chrIV:13777489-13777909
										chrIV:13865127-13865547
										chrIV:13919169-13919589
										chrIV:14069769-14070189
										chrIV:14070890-14071310
										chrIV:14464053-14464473
										chrIV:14586096-14586516
										chrIV:14620068-14620488
										chrIV:14656531-14656951
										chrIV:14767698-14768118
										chrIV:14786730-14787150
										chrIV:14959466-14959886
										chrIV:15028823-15029243
										chrIV:15039512-15039932
										chrIV:15275668-15276088
										chrIV:15312019-15312439
										chrIV:15476343-15476763
										chrIV:15593060-15593480
										chrIV:15701983-15702403
										chrIV:16169586-16170006
										chrIV:16176770-16177190
										chrIV:16388332-16388752
										chrIV:16656229-16656649
										chrIV:16658640-16659060
										chrIV:16663544-16663964
										chrIV:16735928-16736348
										chrIV:16863464-16863884
										chrIV:16946748-16947168
										chrIV:16995433-16995853
										chrIV:17084342-17084762
										chrIV:17088917-17089337
										chrIV:17093652-17094072
										chrIV:17118586-17119006
										chrIV:17174123-17174543
										chrIV:17174954-17175374
										chrIV:17263738-17264158
										chrIV:17278370-17278790
										chrIV:17331095-17331515
										chrIV:17334979-17335399
										chrV:8057-8477
										chrV:156338-156758
										chrV:311471-311891
										chrV:349010-349430
										chrV:453547-453967
										chrV:464784-465204
										chrV:477679-478099
										chrV:964861-965281
										chrV:983592-984012
										chrV:1027052-1027472
										chrV:1264338-1264758
										chrV:1335869-1336289
										chrV:1415630-1416050
										chrV:1466913-1467333
										chrV:1474574-1474994
										chrV:1570009-1570429
										chrV:1627239-1627659
										chrV:1629305-1629725
										chrV:1743459-1743879
										chrV:1871798-1872218
										chrV:1883210-1883630
										chrV:1918003-1918423
										chrV:1992941-1993361
										chrV:1998344-1998764
										chrV:1999629-2000049
										chrV:2109231-2109651
										chrV:2192166-2192586
										chrV:2230892-2231312
										chrV:2244703-2245123
										chrV:2259737-2260157
										chrV:2268786-2269206
										chrV:2290345-2290765
										chrV:2600507-2600927
										chrV:2673865-2674285
										chrV:2802036-2802456
										chrV:3094374-3094794
										chrV:3195043-3195463
										chrV:3444982-3445402
										chrV:3586096-3586516
										chrV:3644270-3644690
										chrV:3703839-3704259
										chrV:4143090-4143510
										chrV:4194808-4195228
										chrV:4341706-4342126
										chrV:4615749-4616169
										chrV:4720886-4721306
										chrV:4823534-4823954
										chrV:4969445-4969865
										chrV:5032122-5032542
										chrV:5067395-5067815
										chrV:5192485-5192905
										chrV:5214893-5215313
										chrV:5271481-5271901
										chrV:5301248-5301668
										chrV:5329689-5330109
										chrV:5383870-5384290
										chrV:5555935-5556355
										chrV:5575966-5576386
										chrV:5584354-5584774
										chrV:5674473-5674893
										chrV:5684547-5684967
										chrV:5776893-5777313
										chrV:5780705-5781125
										chrV:5848317-5848737
										chrV:5851599-5852019
										chrV:6000288-6000708
										chrV:6098778-6099198
										chrV:6100591-6101011
										chrV:6107457-6107877
										chrV:6110452-6110872
										chrV:6213130-6213550
										chrV:6213736-6214156
										chrV:6240802-6241222
										chrV:6275154-6275574
										chrV:6276011-6276431
										chrV:6291321-6291741
										chrV:6357186-6357606
										chrV:6357969-6358389
										chrV:6358711-6359131
										chrV:6431110-6431530
										chrV:6433552-6433972
										chrV:6510395-6510815
										chrV:6551716-6552136
										chrV:6614364-6614784
										chrV:6657576-6657996
										chrV:6838587-6839007
										chrV:6874670-6875090
										chrV:7060308-7060728
										chrV:7070296-7070716
										chrV:7084725-7085145
										chrV:7089233-7089653
										chrV:7093831-7094251
										chrV:7123026-7123446
										chrV:7196431-7196851
										chrV:7198338-7198758
										chrV:7230851-7231271
										chrV:7385972-7386392
										chrV:7441875-7442295
										chrV:7548005-7548425
										chrV:7727736-7728156
										chrV:7734898-7735318
										chrV:7759312-7759732
										chrV:7840318-7840738
										chrV:7844033-7844453
										chrV:7855333-7855753
										chrV:7978752-7979172
										chrV:8000855-8001275
										chrV:8001117-8001537
										chrV:8014018-8014438
										chrV:8015463-8015883
										chrV:8017908-8018328
										chrV:8108996-8109416
										chrV:8221134-8221554
										chrV:8268886-8269306
										chrV:8304784-8305204
										chrV:8335407-8335827
										chrV:8434521-8434941
										chrV:8460286-8460706
										chrV:8518992-8519412
										chrV:8543343-8543763
										chrV:8611034-8611454
										chrV:8648213-8648633
										chrV:8665431-8665851
										chrV:8666513-8666933
										chrV:8936119-8936539
										chrV:8970405-8970825
										chrV:8972464-8972884
										chrV:9073621-9074041
										chrV:9096927-9097347
										chrV:9172983-9173403
										chrV:9254037-9254457
										chrV:9276180-9276600
										chrV:9295432-9295852
										chrV:9296930-9297350
										chrV:9406849-9407269
										chrV:9422698-9423118
										chrV:9424502-9424922
										chrV:9549400-9549820
										chrV:9615601-9616021
										chrV:9690708-9691128
										chrV:9692236-9692656
										chrV:9729733-9730153
										chrV:9730985-9731405
										chrV:9886241-9886661
										chrV:9927966-9928386
										chrV:9930601-9931021
										chrV:10003295-10003715
										chrV:10014086-10014506
										chrV:10036324-10036744
										chrV:10043244-10043664
										chrV:10096927-10097347
										chrV:10161001-10161421
										chrV:10163620-10164040
										chrV:10190114-10190534
										chrV:10204922-10205342
										chrV:10238693-10239113
										chrV:10246899-10247319
										chrV:10281410-10281830
										chrV:10326066-10326486
										chrV:10330605-10331025
										chrV:10361778-10362198
										chrV:10396346-10396766
										chrV:10398455-10398875
										chrV:10441519-10441939
										chrV:10468174-10468594
										chrV:10471131-10471551
										chrV:10478158-10478578
										chrV:10536033-10536453
										chrV:10580648-10581068
										chrV:10673981-10674401
										chrV:10715682-10716102
										chrV:10722695-10723115
										chrV:10724418-10724838
										chrV:10776692-10777112
										chrV:10801198-10801618
										chrV:10802011-10802431
										chrV:10857919-10858339
										chrV:10859231-10859651
										chrV:10891010-10891430
										chrV:10894582-10895002
										chrV:10940546-10940966
										chrV:10961548-10961968
										chrV:10965477-10965897
										chrV:11076405-11076825
										chrV:11078352-11078772
										chrV:11082476-11082896
										chrV:11123935-11124355
										chrV:11229196-11229616
										chrV:11314033-11314453
										chrV:11326948-11327368
										chrV:11378734-11379154
										chrV:11496424-11496844
										chrV:11505005-11505425
										chrV:11513343-11513763
										chrV:11516241-11516661
										chrV:11521408-11521828
										chrV:11604477-11604897
										chrV:11674995-11675415
										chrV:11823453-11823873
										chrV:11856816-11857236
										chrV:11896492-11896912
										chrV:11898092-11898512
										chrV:11951185-11951605
										chrV:11952959-11953379
										chrV:11979844-11980264
										chrV:11993665-11994085
										chrV:12009319-12009739
										chrV:12075951-12076371
										chrV:12082989-12083409
										chrV:12111421-12111841
										chrV:12188846-12189266
										chrV:12195761-12196181
										chrV:12241987-12242407
										chrV:12245029-12245449
										chrV:12288587-12289007
										chrV:12291589-12292009
										chrV:12299480-12299900
										chrV:12300208-12300628
										chrV:12301138-12301558
										chrV:12343532-12343952
										chrV:12450434-12450854
										chrV:12528889-12529309
										chrV:12537785-12538205
										chrV:12599504-12599924
										chrV:12649600-12650020
										chrV:12659411-12659831
										chrV:12697347-12697767
										chrV:12778699-12779119
										chrV:12841688-12842108
										chrV:12877866-12878286
										chrV:12905157-12905577
										chrV:12906623-12907043
										chrV:13001972-13002392
										chrV:13049116-13049536
										chrV:13082557-13082977
										chrV:13130375-13130795
										chrV:13169552-13169972
										chrV:13176328-13176748
										chrV:13313037-13313457
										chrV:13373567-13373987
										chrV:13459317-13459737
										chrV:13497458-13497878
										chrV:13551581-13552001
										chrV:13556656-13557076
										chrV:13571796-13572216
										chrV:13575827-13576247
										chrV:13583258-13583678
										chrV:13638040-13638460
										chrV:13654405-13654825
										chrV:13657306-13657726
										chrV:13660636-13661056
										chrV:13715269-13715689
										chrV:13782191-13782611
										chrV:13789385-13789805
										chrV:13796391-13796811
										chrV:13909416-13909836
										chrV:13953070-13953490
										chrV:14055006-14055426
										chrV:14134583-14135003
										chrV:14145921-14146341
										chrV:14160683-14161103
										chrV:14324473-14324893
										chrV:14347225-14347645
										chrV:14423258-14423678
										chrV:14482764-14483184
										chrV:14497400-14497820
										chrV:14499399-14499819
										chrV:14573897-14574317
										chrV:14685556-14685976
										chrV:14696776-14697196
										chrV:14849629-14850049
										chrV:14899597-14900017
										chrV:14993537-14993957
										chrV:15065413-15065833
										chrV:15087282-15087702
										chrV:15136751-15137171
										chrV:15139819-15140239
										chrV:15298575-15298995
										chrV:15401830-15402250
										chrV:15425874-15426294
										chrV:15434622-15435042
										chrV:15478650-15479070
										chrV:15511598-15512018
										chrV:15533104-15533524
										chrV:15566445-15566865
										chrV:15666684-15667104
										chrV:16000409-16000829
										chrV:16043758-16044178
										chrV:16045856-16046276
										chrV:16083824-16084244
										chrV:16120883-16121303
										chrV:16277899-16278319
										chrV:16350952-16351372
										chrV:16354648-16355068
										chrV:16395144-16395564
										chrV:16401527-16401947
										chrV:16499010-16499430
										chrV:16506547-16506967
										chrV:16724589-16725009
										chrV:17538470-17538890
										chrV:17752293-17752713
										chrV:17891336-17891756
										chrV:17918294-17918714
										chrV:17921424-17921844
										chrV:17951216-17951636
										chrV:18533627-18534047
										chrV:18577461-18577881
										chrV:18669669-18670089
										chrV:18701318-18701738
										chrV:18782755-18783175
										chrV:18800786-18801206
										chrV:18838790-18839210
										chrV:18868437-18868857
										chrV:18957404-18957824
										chrV:18967646-18968066
										chrV:18978313-18978733
										chrV:19119218-19119638
										chrV:19125784-19126204
										chrV:19153250-19153670
										chrV:19158647-19159067
										chrV:19212326-19212746
										chrV:19401442-19401862
										chrV:19522741-19523161
										chrV:19524662-19525082
										chrV:19527502-19527922
										chrV:19529132-19529552
										chrV:19643014-19643434
										chrV:19643921-19644341
										chrV:19722800-19723220
										chrV:20004507-20004927
										chrV:20005737-20006157
										chrV:20066204-20066624
										chrV:20068377-20068797
										chrV:20279894-20280314
										chrV:20416888-20417308
										chrV:20418780-20419200
										chrV:20421934-20422354
										chrV:20424782-20425202
										chrV:20493498-20493918
										chrV:20544553-20544973
										chrV:20580513-20580933
										chrV:20713613-20714033
										chrV:20716848-20717268
										chrV:20744266-20744686
										chrX:380935-381355
										chrX:382736-383156
										chrX:437167-437587
										chrX:532915-533335
										chrX:638871-639291
										chrX:693691-694111
										chrX:694894-695314
										chrX:815904-816324
										chrX:938239-938659
										chrX:974650-975070
										chrX:1035073-1035493
										chrX:1094328-1094748
										chrX:1096805-1097225
										chrX:1222220-1222640
										chrX:1223806-1224226
										chrX:1337841-1338261
										chrX:1338874-1339294
										chrX:1389408-1389828
										chrX:1401221-1401641
										chrX:1446802-1447222
										chrX:1450319-1450739
										chrX:1453800-1454220
										chrX:1479149-1479569
										chrX:1496327-1496747
										chrX:1541121-1541541
										chrX:1888410-1888830
										chrX:2014504-2014924
										chrX:2072609-2073029
										chrX:2089461-2089881
										chrX:2227497-2227917
										chrX:2237413-2237833
										chrX:2287975-2288395
										chrX:2316176-2316596
										chrX:2372100-2372520
										chrX:2439728-2440148
										chrX:2531258-2531678
										chrX:2541081-2541501
										chrX:2565418-2565838
										chrX:2584099-2584519
										chrX:2667798-2668218
										chrX:2688528-2688948
										chrX:2776284-2776704
										chrX:2857365-2857785
										chrX:2876486-2876906
										chrX:2883209-2883629
										chrX:2903673-2904093
										chrX:2939531-2939951
										chrX:2972439-2972859
										chrX:3054774-3055194
										chrX:3087651-3088071
										chrX:3110568-3110988
										chrX:3111714-3112134
										chrX:3114598-3115018
										chrX:3131727-3132147
										chrX:3159557-3159977
										chrX:3245802-3246222
										chrX:3347862-3348282
										chrX:3351982-3352402
										chrX:3379041-3379461
										chrX:3411587-3412007
										chrX:3493968-3494388
										chrX:3606521-3606941
										chrX:3607893-3608313
										chrX:3697519-3697939
										chrX:3785611-3786031
										chrX:3793385-3793805
										chrX:3818619-3819039
										chrX:3820588-3821008
										chrX:3823822-3824242
										chrX:3942864-3943284
										chrX:3945623-3946043
										chrX:3994355-3994775
										chrX:4113653-4114073
										chrX:4139558-4139978
										chrX:4143341-4143761
										chrX:4147981-4148401
										chrX:4209062-4209482
										chrX:4214669-4215089
										chrX:4215528-4215948
										chrX:4248365-4248785
										chrX:4265612-4266032
										chrX:4282345-4282765
										chrX:4284000-4284420
										chrX:4439643-4440063
										chrX:4444818-4445238
										chrX:4462388-4462808
										chrX:4469270-4469690
										chrX:4480737-4481157
										chrX:4502028-4502448
										chrX:4503220-4503640
										chrX:4504290-4504710
										chrX:4521914-4522334
										chrX:4523925-4524345
										chrX:4528859-4529279
										chrX:4532044-4532464
										chrX:4587936-4588356
										chrX:4616831-4617251
										chrX:4619567-4619987
										chrX:4635650-4636070
										chrX:4788883-4789303
										chrX:4793994-4794414
										chrX:4822283-4822703
										chrX:4898310-4898730
										chrX:4901263-4901683
										chrX:4970934-4971354
										chrX:4997705-4998125
										chrX:5207820-5208240
										chrX:5217937-5218357
										chrX:5244059-5244479
										chrX:5298142-5298562
										chrX:5348382-5348802
										chrX:5467853-5468273
										chrX:5485966-5486386
										chrX:5512512-5512932
										chrX:5516388-5516808
										chrX:5529900-5530320
										chrX:5538987-5539407
										chrX:5591834-5592254
										chrX:5764732-5765152
										chrX:5811901-5812321
										chrX:5834704-5835124
										chrX:5949166-5949586
										chrX:5962547-5962967
										chrX:5973327-5973747
										chrX:6015106-6015526
										chrX:6023830-6024250
										chrX:6099337-6099757
										chrX:6204799-6205219
										chrX:6240166-6240586
										chrX:6271751-6272171
										chrX:6371139-6371559
										chrX:6456512-6456932
										chrX:6457927-6458347
										chrX:6522764-6523184
										chrX:6601941-6602361
										chrX:6642813-6643233
										chrX:6656794-6657214
										chrX:6674292-6674712
										chrX:6717372-6717792
										chrX:6736215-6736635
										chrX:6744555-6744975
										chrX:6746773-6747193
										chrX:6749259-6749679
										chrX:6750184-6750604
										chrX:6764398-6764818
										chrX:6788909-6789329
										chrX:6790462-6790882
										chrX:6804843-6805263
										chrX:6808624-6809044
										chrX:6818076-6818496
										chrX:6819643-6820063
										chrX:6844354-6844774
										chrX:6884396-6884816
										chrX:6905587-6906007
										chrX:6934448-6934868
										chrX:7181539-7181959
										chrX:7234717-7235137
										chrX:7260641-7261061
										chrX:7306394-7306814
										chrX:7333147-7333567
										chrX:7340327-7340747
										chrX:7343252-7343672
										chrX:7461948-7462368
										chrX:7468202-7468622
										chrX:7688822-7689242
										chrX:7689657-7690077
										chrX:7799581-7800001
										chrX:7809591-7810011
										chrX:7811855-7812275
										chrX:7843663-7844083
										chrX:7879601-7880021
										chrX:7951743-7952163
										chrX:7999455-7999875
										chrX:8019672-8020092
										chrX:8022252-8022672
										chrX:8026709-8027129
										chrX:8088855-8089275
										chrX:8089538-8089958
										chrX:8160054-8160474
										chrX:8169485-8169905
										chrX:8193260-8193680
										chrX:8196382-8196802
										chrX:8210713-8211133
										chrX:8231846-8232266
										chrX:8323319-8323739
										chrX:8355255-8355675
										chrX:8422039-8422459
										chrX:8434277-8434697
										chrX:8439969-8440389
										chrX:8470342-8470762
										chrX:8492745-8493165
										chrX:8546008-8546428
										chrX:8550109-8550529
										chrX:8569993-8570413
										chrX:8711066-8711486
										chrX:8713885-8714305
										chrX:8757948-8758368
										chrX:8818018-8818438
										chrX:8820636-8821056
										chrX:8831082-8831502
										chrX:8843963-8844383
										chrX:8859539-8859959
										chrX:8931632-8932052
										chrX:8996754-8997174
										chrX:9068191-9068611
										chrX:9078132-9078552
										chrX:9085558-9085978
										chrX:9095870-9096290
										chrX:9100798-9101218
										chrX:9102976-9103396
										chrX:9209299-9209719
										chrX:9212653-9213073
										chrX:9225261-9225681
										chrX:9226972-9227392
										chrX:9245646-9246066
										chrX:9264686-9265106
										chrX:9396575-9396995
										chrX:9428047-9428467
										chrX:9441480-9441900
										chrX:9508237-9508657
										chrX:9527464-9527884
										chrX:9531663-9532083
										chrX:9547508-9547928
										chrX:9560949-9561369
										chrX:9602634-9603054
										chrX:9792132-9792552
										chrX:9851899-9852319
										chrX:9899684-9900104
										chrX:9940504-9940924
										chrX:10001480-10001900
										chrX:10051608-10052028
										chrX:10084160-10084580
										chrX:10148227-10148647
										chrX:10187927-10188347
										chrX:10229339-10229759
										chrX:10239031-10239451
										chrX:10379678-10380098
										chrX:10391151-10391571
										chrX:10396475-10396895
										chrX:10440358-10440778
										chrX:10524476-10524896
										chrX:10527386-10527806
										chrX:10629905-10630325
										chrX:10634778-10635198
										chrX:10638335-10638755
										chrX:10772095-10772515
										chrX:10900986-10901406
										chrX:10916163-10916583
										chrX:10990571-10990991
										chrX:10991553-10991973
										chrX:11047220-11047640
										chrX:11206970-11207390
										chrX:11252454-11252874
										chrX:11262334-11262754
										chrX:11310294-11310714
										chrX:11388479-11388899
										chrX:11409502-11409922
										chrX:11418675-11419095
										chrX:11466421-11466841
										chrX:11481051-11481471
										chrX:11481618-11482038
										chrX:11515390-11515810
										chrX:11546580-11547000
										chrX:11603347-11603767
										chrX:11605976-11606396
										chrX:11661620-11662040
										chrX:11662115-11662535
										chrX:11664152-11664572
										chrX:11738574-11738994
										chrX:11757706-11758126
										chrX:11791574-11791994
										chrX:11937336-11937756
										chrX:11947074-11947494
										chrX:12012615-12013035
										chrX:12017955-12018375
										chrX:12039836-12040256
										chrX:12171942-12172362
										chrX:12177868-12178288
										chrX:12179046-12179466
										chrX:12184028-12184448
										chrX:12234470-12234890
										chrX:12241420-12241840
										chrX:12350191-12350611
										chrX:12393791-12394211
										chrX:12435253-12435673
										chrX:12436417-12436837
										chrX:12454256-12454676
										chrX:12466791-12467211
										chrX:12478446-12478866
										chrX:12518434-12518854
										chrX:12518979-12519399
										chrX:12630000-12630420
										chrX:12664993-12665413
										chrX:12668140-12668560
										chrX:12749852-12750272
										chrX:12759051-12759471
										chrX:12797651-12798071
										chrX:12876866-12877286
										chrX:12890176-12890596
										chrX:12904312-12904732
										chrX:12975622-12976042
										chrX:12989206-12989626
										chrX:13059985-13060405
										chrX:13104870-13105290
										chrX:13121151-13121571
										chrX:13122957-13123377
										chrX:13156416-13156836
										chrX:13159052-13159472
										chrX:13264541-13264961
										chrX:13310714-13311134
										chrX:13311642-13312062
										chrX:13356416-13356836
										chrX:13359706-13360126
										chrX:13360640-13361060
										chrX:13366976-13367396
										chrX:13369212-13369632
										chrX:13377580-13378000
										chrX:13442432-13442852
										chrX:13448773-13449193
										chrX:13595983-13596403
										chrX:13654208-13654628
										chrX:13669623-13670043
										chrX:13672805-13673225
										chrX:13730475-13730895
										chrX:13743379-13743799
										chrX:13950600-13951020
										chrX:13995780-13996200
										chrX:14101973-14102393
										chrX:14197153-14197573
										chrX:14338067-14338487
										chrX:14349668-14350088
										chrX:14500487-14500907
										chrX:14502229-14502649
										chrX:14533026-14533446
										chrX:14557326-14557746
										chrX:14560167-14560587
										chrX:14589065-14589485
										chrX:14708229-14708649
										chrX:14711104-14711524
										chrX:14746976-14747396
										chrX:14759637-14760057
										chrX:14813345-14813765
										chrX:14841035-14841455
										chrX:14853789-14854209
										chrX:14875604-14876024
										chrX:14946633-14947053
										chrX:14947278-14947698
										chrX:15040705-15041125
										chrX:15049996-15050416
										chrX:15094898-15095318
										chrX:15213392-15213812
										chrX:15274309-15274729
										chrX:15276655-15277075
										chrX:15279470-15279890
										chrX:15365739-15366159
										chrX:15408585-15409005
										chrX:15567856-15568276
										chrX:15590529-15590949
										chrX:15606846-15607266
										chrX:15618850-15619270
										chrX:15647228-15647648
										chrX:15684081-15684501
										chrX:15736465-15736885
										chrX:15771384-15771804
										chrX:15838549-15838969
										chrX:15842499-15842919
										chrX:15847525-15847945
										chrX:15941521-15941941
										chrX:16082015-16082435
										chrX:16127840-16128260
										chrX:16152017-16152437
										chrX:16166463-16166883
										chrX:16192472-16192892
										chrX:16202284-16202704
										chrX:16205727-16206147
										chrX:16209673-16210093
										chrX:16218277-16218697
										chrX:16319798-16320218
										chrX:16410507-16410927
										chrX:16445868-16446288
										chrX:16558696-16559116
										chrX:16590768-16591188
										chrX:16604614-16605034
										chrX:16612306-16612726
										chrX:16612304-16612724
										chrX:16669330-16669750
										chrX:16704098-16704518
										chrX:16772195-16772615
										chrX:16776868-16777288
										chrX:16813999-16814419
										chrX:16929566-16929986
										chrX:16940277-16940697
										chrX:17092400-17092820
										chrX:17184358-17184778
										chrX:17197853-17198273
										chrX:17205856-17206276
										chrX:17221796-17222216
										chrX:17224439-17224859
										chrX:17330569-17330989
										chrX:17333089-17333509
[truncated: 8 more rows]
