# Supplementary material for: Forkhead transcription factor FKH-8 cooperates with RFX in the direct regulation of sensory cilia in Caenorhabditis elegans
Source: eLife. 2023 Jul 14;12:e89702. doi: 10.7554/eLife.89702 (PMC10393296; doi:10.7554/eLife.89702)
Supplement: Figure 3—source data 1. [file elife-89702-fig3-data1.xlsx]

## Sheet: F3 B and F3FS1 A
Gene	Reporter	Rep. Lenght	Background	Temp. (º)	N	Worm	Stage	Labial Region	Amphid Region	Anterior Deirid Region	Posterior Deirid Region	Phasmid Region	Neurons
peli-1	vlcEx835	225	fkh-8(tm292)	25	11	1	Young Adult	4	11	0	0	3	18
peli-1	vlcEx835	225	fkh-8(tm292)	25	11	2	Young Adult	4	5	0	0	3	12
peli-1	vlcEx835	225	fkh-8(tm292)	25	11	3	Young Adult	4	10	0	0	3	17
peli-1	vlcEx835	225	fkh-8(tm292)	25	11	4	Young Adult	4	12	0	0	5	21
peli-1	vlcEx835	225	fkh-8(tm292)	25	11	5	Young Adult	4	10	0	0	4	18
peli-1	vlcEx835	225	fkh-8(tm292)	25	11	6	Young Adult	4	8	0	0	3	15
peli-1	vlcEx835	225	fkh-8(tm292)	25	11	7	Young Adult	4	12	0	0	4	20
peli-1	vlcEx835	225	fkh-8(tm292)	25	11	8	Young Adult	5	12	0	0	4	21
peli-1	vlcEx835	225	fkh-8(tm292)	25	11	9	Young Adult	4	10	0	0	5	19
peli-1	vlcEx835	225	fkh-8(tm292)	25	11	10	Young Adult	5	10	0	0	2	17
peli-1	vlcEx835	225	fkh-8(tm292)	25	11	11	Young Adult	4	13	0	0	4	21
peli-1	vlcEx835	225	fkh-8(tm292)	25	11	ALL	Mean	4.18182	10.2727	0	0	3.63636	18.0909
peli-1	vlcEx835	225	fkh-8(tm292)	25	11	ALL	SD	0.40452	2.24013	0	0	0.924416	2.80908
osm-5	vlcEx1133	142	fkh-8(tm292)	25	12	1	Young Adult	0	4	0	0	2	6
osm-5	vlcEx1133	142	fkh-8(tm292)	25	12	2	Young Adult	0	6	0	0	3	9
osm-5	vlcEx1133	142	fkh-8(tm292)	25	12	3	Young Adult	0	8	0	0	4	12
osm-5	vlcEx1133	142	fkh-8(tm292)	25	12	4	Young Adult	0	3	0	0	3	6
osm-5	vlcEx1133	142	fkh-8(tm292)	25	12	5	Young Adult	0	8	0	0	4	12
osm-5	vlcEx1133	142	fkh-8(tm292)	25	12	6	Young Adult	0	6	0	0	3	9
osm-5	vlcEx1133	142	fkh-8(tm292)	25	12	7	Young Adult	0	4	0	0	3	7
osm-5	vlcEx1133	142	fkh-8(tm292)	25	12	8	Young Adult	0	5	0	0	4	9
osm-5	vlcEx1133	142	fkh-8(tm292)	25	12	9	Young Adult	1	3	0	0	3	7
osm-5	vlcEx1133	142	fkh-8(tm292)	25	12	10	Young Adult	0	5	0	0	4	9
osm-5	vlcEx1133	142	fkh-8(tm292)	25	12	11	Young Adult	0	5	0	0	4	9
osm-5	vlcEx1133	142	fkh-8(tm292)	25	12	12	Young Adult	0	8	0	0	4	12
osm-5	vlcEx1133	142	fkh-8(tm292)	25	12	ALL	Mean	0.0833333	5.41667	0	0	3.41667	8.91667
osm-5	vlcEx1133	142	fkh-8(tm292)	25	12	ALL	SD	0.288675	1.83196	0	0	0.668558	2.19331
ift-20	otIs395	171	fkh-8(tm292)	25	10	1	Young Adult	17	23	0	1	5	46
ift-20	otIs395	171	fkh-8(tm292)	25	10	2	Young Adult	22	24	2	2	5	55
ift-20	otIs395	171	fkh-8(tm292)	25	10	3	Young Adult	21	24	2	0	4	51
ift-20	otIs395	171	fkh-8(tm292)	25	10	4	Young Adult	23	24	1	0	4	52
ift-20	otIs395	171	fkh-8(tm292)	25	10	5	Young Adult	17	23	1	1	4	46
ift-20	otIs395	171	fkh-8(tm292)	25	10	6	Young Adult	22	24	1	0	4	51
ift-20	otIs395	171	fkh-8(tm292)	25	10	7	Young Adult	18	24	1	0	4	47
ift-20	otIs395	171	fkh-8(tm292)	25	10	8	Young Adult	18	24	0	0	4	46
ift-20	otIs395	171	fkh-8(tm292)	25	10	9	Young Adult	17	24	0	0	4	45
ift-20	otIs395	171	fkh-8(tm292)	25	10	10	Young Adult	18	24	1	1	4	48
ift-20	otIs395	171	fkh-8(tm292)	25	10	ALL	Mean	19.3	23.8	0.9	0.5	4.2	48.7
ift-20	otIs395	171	fkh-8(tm292)	25	10	ALL	SD	2.40601	0.421637	0.737865	0.707107	0.421637	3.335
tub-1	vlcEx821	424	fkh-8(tm292)	25	5	1	Young Adult	21	26	3	2	5	57
tub-1	vlcEx821	424	fkh-8(tm292)	25	5	2	Young Adult	18	24	3	1	4	50
tub-1	vlcEx821	424	fkh-8(tm292)	25	5	3	Young Adult	19	24	3	0	5	51
tub-1	vlcEx821	424	fkh-8(tm292)	25	5	4	Young Adult	21	25	1	1	5	53
tub-1	vlcEx821	424	fkh-8(tm292)	25	5	5	Young Adult	15	23	3	2	5	48
tub-1	vlcEx821	424	fkh-8(tm292)	25	5	ALL	Mean	18.8	24.4	2.6	1.2	4.8	51.8
tub-1	vlcEx821	424	fkh-8(tm292)	25	5	ALL	SD	2.48998	1.14018	0.894427	0.83666	0.447214	3.42053
xbx-1	vlcEx822	370	fkh-8(tm292)	25	5	1	Young Adult	21	24	3	2	5	55
xbx-1	vlcEx822	370	fkh-8(tm292)	25	5	2	Young Adult	19	24	3	1	3	50
xbx-1	vlcEx822	370	fkh-8(tm292)	25	5	3	Young Adult	21	22	2	2	4	51
xbx-1	vlcEx822	370	fkh-8(tm292)	25	5	4	Young Adult	21	23	2	2	4	52
xbx-1	vlcEx822	370	fkh-8(tm292)	25	5	5	Young Adult	21	23	2	2	5	53
xbx-1	vlcEx822	370	fkh-8(tm292)	25	5	ALL	Mean	20.6	23.2	2.4	1.8	4.2	52.2
xbx-1	vlcEx822	370	fkh-8(tm292)	25	5	ALL	SD	0.894427	0.83666	0.547723	0.447214	0.83666	1.92354
osm-1	vlcEx815	1770	wild type	25	9	1	Young Adult	20	25	0	0	5	50
osm-1	vlcEx815	1770	wild type	25	9	2	Young Adult	19	17	3	0	5	44
osm-1	vlcEx815	1770	wild type	25	9	3	Young Adult	16	24	0	0	3	43
osm-1	vlcEx815	1770	wild type	25	9	4	Young Adult	20	22	2	1	4	49
osm-1	vlcEx815	1770	wild type	25	9	5	Young Adult	21	22	1	0	5	49
osm-1	vlcEx815	1770	wild type	25	9	6	Young Adult	21	26	0	0	5	52
osm-1	vlcEx815	1770	wild type	25	9	7	Young Adult	20	24	0	0	4	48
osm-1	vlcEx815	1770	wild type	25	9	8	Young Adult	21	22	3	0	5	51
osm-1	vlcEx815	1770	wild type	25	9	9	Young Adult	20	21	2	0	5	48
osm-1	vlcEx815	1770	wild type	25	9	ALL	Mean	19.7778	22.5556	1.22222	0.111111	4.55556	48.2222
osm-1	vlcEx815	1770	wild type	25	9	ALL	SD	1.56347	2.651	1.30171	0.333333	0.726483	2.99073
osm-1	vlcEx815	1770	fkh-8(tm292)	25	9	1	Young Adult	13	18	0	0	4	35
osm-1	vlcEx815	1770	fkh-8(tm292)	25	9	2	Young Adult	16	24	0	0	3	43
osm-1	vlcEx815	1770	fkh-8(tm292)	25	9	3	Young Adult	12	21	0	0	4	37
osm-1	vlcEx815	1770	fkh-8(tm292)	25	9	4	Young Adult	20	22	0	0	4	46
osm-1	vlcEx815	1770	fkh-8(tm292)	25	9	5	Young Adult	20	24	0	0	5	49
osm-1	vlcEx815	1770	fkh-8(tm292)	25	9	6	Young Adult	16	23	0	0	4	43
osm-1	vlcEx815	1770	fkh-8(tm292)	25	9	7	Young Adult	13	23	0	0	3	39
osm-1	vlcEx815	1770	fkh-8(tm292)	25	9	8	Young Adult	15	23	0	0	4	42
osm-1	vlcEx815	1770	fkh-8(tm292)	25	9	9	Young Adult	18	20	2	0	3	43
osm-1	vlcEx815	1770	fkh-8(tm292)	25	9	ALL	Mean	15.8889	22	0.222222	0	3.77778	41.8889
osm-1	vlcEx815	1770	fkh-8(tm292)	25	9	ALL	SD	2.97676	2	0.666667	0	0.666667	4.34294
osm-5	vlcEx1133	142	wild type	25	8	1	Young Adult	4	4	3	2	4	17
osm-5	vlcEx1133	142	wild type	25	8	2	Young Adult	6	6	1	1	4	18
osm-5	vlcEx1133	142	wild type	25	8	3	Young Adult	3	7	1	1	3	15
osm-5	vlcEx1133	142	wild type	25	8	4	Young Adult	3	7	1	0	3	14
osm-5	vlcEx1133	142	wild type	25	8	5	Young Adult	2	8	2	1	3	16
osm-5	vlcEx1133	142	wild type	25	8	6	Young Adult	7	5	1	1	4	18
osm-5	vlcEx1133	142	wild type	25	8	7	Young Adult	6	6	0	1	4	17
osm-5	vlcEx1133	142	wild type	25	8	8	Young Adult	2	7	1	0	5	15
osm-5	vlcEx1133	142	wild type	25	8	ALL	Mean	4.125	6.25	1.25	0.875	3.75	16.25
osm-5	vlcEx1133	142	wild type	25	8	ALL	SD	1.95941	1.28174	0.886405	0.64087	0.707107	1.48805
peli-1	vlcEx835	225	wild type	25	7	1	Young Adult	3	16	0	0	5	24
peli-1	vlcEx835	225	wild type	25	7	2	Young Adult	7	15	0	0	3	25
peli-1	vlcEx835	225	wild type	25	7	3	Young Adult	6	10	0	0	5	21
peli-1	vlcEx835	225	wild type	25	7	4	Young Adult	6	15	0	0	5	26
peli-1	vlcEx835	225	wild type	25	7	5	Young Adult	8	13	0	0	4	25
peli-1	vlcEx835	225	wild type	25	7	6	Young Adult	7	15	0	0	5	27
peli-1	vlcEx835	225	wild type	25	7	7	Young Adult	10	15	0	0	4	29
peli-1	vlcEx835	225	wild type	25	7	ALL	Mean	6.71429	14.1429	0	0	4.42857	25.2857
peli-1	vlcEx835	225	wild type	25	7	ALL	SD	2.13809	2.0354	0	0	0.786796	2.49762
xbx-1	vlcEx1137	105	wild type	25	5	1	Young Adult	19	17	3	2	5	46
xbx-1	vlcEx1137	105	wild type	25	5	2	Young Adult	17	16	2	2	5	42
xbx-1	vlcEx1137	105	wild type	25	5	3	Young Adult	20	21	3	2	5	51
xbx-1	vlcEx1137	105	wild type	25	5	4	Young Adult	20	22	3	1	3	49
xbx-1	vlcEx1137	105	wild type	25	5	5	Young Adult	21	17	2	1	5	46
xbx-1	vlcEx1137	105	wild type	25	5	ALL	Mean	19.4	18.6	2.6	1.6	4.6	46.8
xbx-1	vlcEx1137	105	wild type	25	5	ALL	SD	1.51658	2.70185	0.547723	0.547723	0.894427	3.42053
xbx-1	vlcEx1137	105	fkh-8(tm292)	25	6	1	Young Adult	20	18	0	0	3	41
xbx-1	vlcEx1137	105	fkh-8(tm292)	25	6	2	Young Adult	21	20	2	0	5	48
xbx-1	vlcEx1137	105	fkh-8(tm292)	25	6	3	Young Adult	17	19	1	0	4	41
xbx-1	vlcEx1137	105	fkh-8(tm292)	25	6	4	Young Adult	20	20	1	0	4	45
xbx-1	vlcEx1137	105	fkh-8(tm292)	25	6	5	Young Adult	20	19	2	1	5	47
xbx-1	vlcEx1137	105	fkh-8(tm292)	25	6	6	Young Adult	18	16	1	0	3	38
xbx-1	vlcEx1137	105	fkh-8(tm292)	25	6	ALL	Mean	19.3333	18.6667	1.16667	0.166667	4	43.3333
xbx-1	vlcEx1137	105	fkh-8(tm292)	25	6	ALL	SD	1.50555	1.50555	0.752773	0.408248	0.894427	3.93277
ift-20	otIs395	171	wild type	25	10	1	Young Adult	22	23	4	2	5	56
ift-20	otIs395	171	wild type	25	10	2	Young Adult	20	23	2	2	5	52
ift-20	otIs395	171	wild type	25	10	3	Young Adult	22	23	1	2	5	53
ift-20	otIs395	171	wild type	25	10	4	Young Adult	23	24	3	2	5	57
ift-20	otIs395	171	wild type	25	10	5	Young Adult	23	23	3	2	4	55
ift-20	otIs395	171	wild type	25	10	6	Young Adult	24	24	3	2	5	58
ift-20	otIs395	171	wild type	25	10	7	Young Adult	24	24	3	2	5	58
ift-20	otIs395	171	wild type	25	10	8	Young Adult	24	24	1	2	5	56
ift-20	otIs395	171	wild type	25	10	9	Young Adult	22	23	2	2	5	54
ift-20	otIs395	171	wild type	25	10	10	Young Adult	24	24	5	2	5	60
ift-20	otIs395	171	wild type	25	10	ALL	Mean	22.8	23.5	2.7	2	4.9	55.9
ift-20	otIs395	171	wild type	25	10	ALL	SD	1.31656	0.527046	1.25167	0	0.316228	2.46982
tub-1	vlcEx821	424	wild type	25	10	1	Young Adult	22	21	3	2	5	53
tub-1	vlcEx821	424	wild type	25	10	2	Young Adult	20	23	2	2	5	52
tub-1	vlcEx821	424	wild type	25	10	3	Young Adult	22	23	3	2	4	54
tub-1	vlcEx821	424	wild type	25	10	4	Young Adult	18	23	2	2	4	49
tub-1	vlcEx821	424	wild type	25	10	5	Young Adult	22	22	1	1	5	51
tub-1	vlcEx821	424	wild type	25	10	6	Young Adult	22	26	3	2	5	58
tub-1	vlcEx821	424	wild type	25	10	7	Young Adult	20	24	3	2	5	54
tub-1	vlcEx821	424	wild type	25	10	8	Young Adult	21	21	1	2	5	50
tub-1	vlcEx821	424	wild type	25	10	9	Young Adult	22	25	3	2	3	55
tub-1	vlcEx821	424	wild type	25	10	10	Young Adult	20	25	2	2	3	52
tub-1	vlcEx821	424	wild type	25	10	ALL	Mean	20.9	23.3	2.3	1.9	4.4	52.8
tub-1	vlcEx821	424	wild type	25	10	ALL	SD	1.37032	1.70294	0.823273	0.316228	0.843274	2.61619
xbx-1	vlcEx822	370	wild type	25	5	1	Young Adult	21	26	2	2	5	56
xbx-1	vlcEx822	370	wild type	25	5	2	Young Adult	18	21	3	1	3	46
xbx-1	vlcEx822	370	wild type	25	5	3	Young Adult	20	25	2	1	5	53
xbx-1	vlcEx822	370	wild type	25	5	4	Young Adult	20	24	2	1	5	52
xbx-1	vlcEx822	370	wild type	25	5	5	Young Adult	21	25	2	1	4	53
xbx-1	vlcEx822	370	wild type	25	5	ALL	Mean	20	24.2	2.2	1.2	4.4	52
xbx-1	vlcEx822	370	wild type	25	5	ALL	SD	1.22474	1.92354	0.447214	0.447214	0.894427	3.67423
peli-1	vlcEx824	1108	wild type	25	6	1	Young Adult	15	18	1	2	3	39
peli-1	vlcEx824	1108	wild type	25	6	2	Young Adult	18	15	1	2	4	40
peli-1	vlcEx824	1108	wild type	25	6	3	Young Adult	20	19	2	2	6	49
peli-1	vlcEx824	1108	wild type	25	6	4	Young Adult	17	21	3	2	6	49
peli-1	vlcEx824	1108	wild type	25	6	5	Young Adult	22	19	1	2	5	49
peli-1	vlcEx824	1108	wild type	25	6	6	Young Adult	16	18	3	2	5	44
peli-1	vlcEx824	1108	wild type	25	6	ALL	Mean	18	18.3333	1.83333	2	4.83333	45
peli-1	vlcEx824	1108	wild type	25	6	ALL	SD	2.60768	1.96638	0.983192	0	1.16905	4.69042
tub-1	vlcEx821	424	fkh-8(vlc43)	25	5	1	Young Adult	19	25	3	2	5	54
tub-1	vlcEx821	424	fkh-8(vlc43)	25	5	2	Young Adult	19	24	3	2	5	53
tub-1	vlcEx821	424	fkh-8(vlc43)	25	5	3	Young Adult	20	22	3	2	5	52
tub-1	vlcEx821	424	fkh-8(vlc43)	25	5	4	Young Adult	18	24	3	2	5	52
tub-1	vlcEx821	424	fkh-8(vlc43)	25	5	5	Young Adult	20	24	3	1	5	53
tub-1	vlcEx821	424	fkh-8(vlc43)	25	5	ALL	Mean	19.2	23.8	3	1.8	5	52.8
tub-1	vlcEx821	424	fkh-8(vlc43)	25	5	ALL	SD	0.83666	1.09545	0	0.447214	0	0.83666
osm-5	vlcEx1133	142	fkh-8(vlc43)	25	10	1	Young Adult	0	7	0	0	3	10
osm-5	vlcEx1133	142	fkh-8(vlc43)	25	10	2	Young Adult	0	5	0	0	2	7
osm-5	vlcEx1133	142	fkh-8(vlc43)	25	10	3	Young Adult	0	5	0	0	3	8
osm-5	vlcEx1133	142	fkh-8(vlc43)	25	10	4	Young Adult	0	4	0	0	4	8
osm-5	vlcEx1133	142	fkh-8(vlc43)	25	10	5	Young Adult	0	4	0	0	3	7
osm-5	vlcEx1133	142	fkh-8(vlc43)	25	10	6	Young Adult	0	5	0	0	4	9
osm-5	vlcEx1133	142	fkh-8(vlc43)	25	10	7	Young Adult	0	5	0	0	4	9
osm-5	vlcEx1133	142	fkh-8(vlc43)	25	10	8	Young Adult	0	1	0	0	2	3
osm-5	vlcEx1133	142	fkh-8(vlc43)	25	10	9	Young Adult	0	2	0	0	3	5
osm-5	vlcEx1133	142	fkh-8(vlc43)	25	10	10	Young Adult	0	2	0	0	3	5
osm-5	vlcEx1133	142	fkh-8(vlc43)	25	10	ALL	Mean	0	4	0	0	3.1	7.1
osm-5	vlcEx1133	142	fkh-8(vlc43)	25	10	ALL	SD	0	1.82574	0	0	0.737865	2.18327
peli-1	vlcEx835	225	fkh-8(vlc43)	25	12	1	Young Adult	4	8	0	0	4	16
peli-1	vlcEx835	225	fkh-8(vlc43)	25	12	2	Young Adult	3	8	0	0	4	15
peli-1	vlcEx835	225	fkh-8(vlc43)	25	12	3	Young Adult	2	9	0	0	4	15
peli-1	vlcEx835	225	fkh-8(vlc43)	25	12	4	Young Adult	2	7	0	0	4	13
peli-1	vlcEx835	225	fkh-8(vlc43)	25	12	5	Young Adult	2	7	0	0	3	12
peli-1	vlcEx835	225	fkh-8(vlc43)	25	12	6	Young Adult	3	7	0	0	5	15
peli-1	vlcEx835	225	fkh-8(vlc43)	25	12	7	Young Adult	4	9	0	0	4	17
peli-1	vlcEx835	225	fkh-8(vlc43)	25	12	8	Young Adult	4	3	0	0	4	11
peli-1	vlcEx835	225	fkh-8(vlc43)	25	12	9	Young Adult	2	4	0	0	3	9
peli-1	vlcEx835	225	fkh-8(vlc43)	25	12	10	Young Adult	2	4	0	0	3	9
peli-1	vlcEx835	225	fkh-8(vlc43)	25	12	11	Young Adult	3	5	0	0	3	11
peli-1	vlcEx835	225	fkh-8(vlc43)	25	12	12	Young Adult	5	6	0	0	3	14
peli-1	vlcEx835	225	fkh-8(vlc43)	25	12	ALL	Mean	3	6.41667	0	0	3.66667	13.0833
peli-1	vlcEx835	225	fkh-8(vlc43)	25	12	ALL	SD	1.04447	2.02073	0	0	0.651339	2.67848
ift-20	otIs395	171	fkh-8(vlc43)	25	12	1	Young Adult	18	24	1	0	4	47
ift-20	otIs395	171	fkh-8(vlc43)	25	12	2	Young Adult	18	23	0	0	4	45
ift-20	otIs395	171	fkh-8(vlc43)	25	12	3	Young Adult	16	22	0	0	4	42
ift-20	otIs395	171	fkh-8(vlc43)	25	12	4	Young Adult	14	24	1	0	4	43
ift-20	otIs395	171	fkh-8(vlc43)	25	12	5	Young Adult	16	23	0	0	4	43
ift-20	otIs395	171	fkh-8(vlc43)	25	12	6	Young Adult	18	24	1	0	5	48
ift-20	otIs395	171	fkh-8(vlc43)	25	12	7	Young Adult	18	23	0	0	4	45
ift-20	otIs395	171	fkh-8(vlc43)	25	12	8	Young Adult	18	23	0	0	4	45
ift-20	otIs395	171	fkh-8(vlc43)	25	12	9	Young Adult	18	23	0	0	4	45
ift-20	otIs395	171	fkh-8(vlc43)	25	12	10	Young Adult	18	24	0	0	4	46
ift-20	otIs395	171	fkh-8(vlc43)	25	12	11	Young Adult	18	24	1	0	4	47
ift-20	otIs395	171	fkh-8(vlc43)	25	12	12	Young Adult	18	24	0	0	5	47
ift-20	otIs395	171	fkh-8(vlc43)	25	12	ALL	Mean	17.3333	23.4167	0.333333	0	4.16667	45.25
ift-20	otIs395	171	fkh-8(vlc43)	25	12	ALL	SD	1.30268	0.668558	0.492366	0	0.389249	1.86474
peli-1	vlcEx824	1108	fkh-8(vlc43)	25	6	1	Young Adult	17	20	2	2	5	46
peli-1	vlcEx824	1108	fkh-8(vlc43)	25	6	2	Young Adult	18	19	2	2	5	46
peli-1	vlcEx824	1108	fkh-8(vlc43)	25	6	3	Young Adult	20	21	3	2	5	51
peli-1	vlcEx824	1108	fkh-8(vlc43)	25	6	4	Young Adult	17	18	2	2	3	42
peli-1	vlcEx824	1108	fkh-8(vlc43)	25	6	5	Young Adult	20	20	1	2	3	46
peli-1	vlcEx824	1108	fkh-8(vlc43)	25	6	6	Young Adult	17	20	2	2	4	45
peli-1	vlcEx824	1108	fkh-8(vlc43)	25	6	ALL	Mean	18.1667	19.6667	2	2	4.16667	46
peli-1	vlcEx824	1108	fkh-8(vlc43)	25	6	ALL	SD	1.47196	1.0328	0.632456	0	0.983192	2.89828
xbx-1	vlcEx1137	105	fkh-8(vlc43)	25	6	1	Young Adult	19	19	1	2	4	45
xbx-1	vlcEx1137	105	fkh-8(vlc43)	25	6	2	Young Adult	17	16	2	1	5	41
xbx-1	vlcEx1137	105	fkh-8(vlc43)	25	6	3	Young Adult	19	17	2	0	3	41
xbx-1	vlcEx1137	105	fkh-8(vlc43)	25	6	4	Young Adult	21	15	3	0	4	43
xbx-1	vlcEx1137	105	fkh-8(vlc43)	25	6	5	Young Adult	22	19	2	0	3	46
xbx-1	vlcEx1137	105	fkh-8(vlc43)	25	6	6	Young Adult	17	16	1	0	3	37
xbx-1	vlcEx1137	105	fkh-8(vlc43)	25	6	ALL	Mean	19.1667	17	1.83333	0.5	3.66667	42.1667
xbx-1	vlcEx1137	105	fkh-8(vlc43)	25	6	ALL	SD	2.04124	1.67332	0.752773	0.83666	0.816497	3.25064
osm-1	vlcEx815	1770	fkh-8(vlc43)	25	9	1	Young Adult	9	18	0	1	4	32
osm-1	vlcEx815	1770	fkh-8(vlc43)	25	9	2	Young Adult	10	11	0	0	3	24
osm-1	vlcEx815	1770	fkh-8(vlc43)	25	9	3	Young Adult	12	19	0	0	4	35
osm-1	vlcEx815	1770	fkh-8(vlc43)	25	9	4	Young Adult	13	15	0	0	4	32
osm-1	vlcEx815	1770	fkh-8(vlc43)	25	9	5	Young Adult	10	14	0	0	4	28
osm-1	vlcEx815	1770	fkh-8(vlc43)	25	9	6	Young Adult	7	12	0	0	4	23
osm-1	vlcEx815	1770	fkh-8(vlc43)	25	9	7	Young Adult	5	10	0	0	4	19
osm-1	vlcEx815	1770	fkh-8(vlc43)	25	9	8	Young Adult	11	19	0	0	4	34
osm-1	vlcEx815	1770	fkh-8(vlc43)	25	9	9	Young Adult	10	13	0	0	2	25
osm-1	vlcEx815	1770	fkh-8(vlc43)	25	9	ALL	Mean	9.66667	14.5556	0	0.111111	3.66667	28
osm-1	vlcEx815	1770	fkh-8(vlc43)	25	9	ALL	SD	2.44949	3.43188	0	0.333333	0.707107	5.56776
xbx-1	vlcEx822	370	fkh-8(vlc43)	25	6	1	Young Adult	20	17	3	1	5	46
xbx-1	vlcEx822	370	fkh-8(vlc43)	25	6	2	Young Adult	19	18	3	2	5	47
xbx-1	vlcEx822	370	fkh-8(vlc43)	25	6	3	Young Adult	22	20	3	2	4	51
xbx-1	vlcEx822	370	fkh-8(vlc43)	25	6	4	Young Adult	18	21	3	2	5	49
xbx-1	vlcEx822	370	fkh-8(vlc43)	25	6	5	Young Adult	19	21	2	1	5	48
xbx-1	vlcEx822	370	fkh-8(vlc43)	25	6	6	Young Adult	17	21	2	2	5	47
xbx-1	vlcEx822	370	fkh-8(vlc43)	25	6	ALL	Mean	19.1667	19.6667	2.66667	1.66667	4.83333	48
xbx-1	vlcEx822	370	fkh-8(vlc43)	25	6	ALL	SD	1.7224	1.75119	0.516398	0.516398	0.408248	1.78885
peli-1	vlcEx824	1108	fkh-8(tm292)	25	6	1	Young Adult	17	19	0	2	4	42
peli-1	vlcEx824	1108	fkh-8(tm292)	25	6	2	Young Adult	20	18	2	2	4	46
peli-1	vlcEx824	1108	fkh-8(tm292)	25	6	3	Young Adult	18	19	2	2	4	45
peli-1	vlcEx824	1108	fkh-8(tm292)	25	6	4	Young Adult	19	22	2	2	4	49
peli-1	vlcEx824	1108	fkh-8(tm292)	25	6	5	Young Adult	18	19	2	1	3	43
peli-1	vlcEx824	1108	fkh-8(tm292)	25	6	6	Young Adult	17	20	1	2	4	44
peli-1	vlcEx824	1108	fkh-8(tm292)	25	6	ALL	Mean	18.1667	19.5	1.5	1.83333	3.83333	44.8333
peli-1	vlcEx824	1108	fkh-8(tm292)	25	6	ALL	SD	1.16905	1.3784	0.83666	0.408248	0.408248	2.48328

## Sheet: F3 B and F3S1 A pval
ift-20	Labial Region	Amphid Region	Anterior Deirid Region	Posterior Deirid Region	Phasmid Region	WORM		osm-1	Labial Region	Amphid Region	Anterior Deirid Region	Posterior Deirid Region	Phasmid Region	WORM		Bonferroni	0.0166667
WT/cilia	0.95	0.979167	0.54	1	0.98	0.931667		WT/cilia	0.824074	0.939815	0.244444	0.0555556	0.911111	0.803704
																	B.H
WT vs tm292	Labial Region	Amphid Region	Anterior Deirid Region	Posterior Deirid Region	Phasmid Region	WORM		WT vs tm292	Labial Region	Amphid Region	Anterior Deirid Region	Posterior Deirid Region	Phasmid Region	WORM		1	0.0166667
F	0.0869938	0.51664	0.131236	NA	0.40432	0.384255		F	0.0870189	0.442666	0.0760206	NA	0.813871	0.311731		2	0.0333333
t	0.000388016	0.0884398	0.00050456	4.3857e-05	0.000269109	3.28055e-05		t	0.00157945	0.311292	0.0284917	0.173297	0.0154566	0.00238307		3	0.05
tm292/WT	0.846491	1.01277	0.333333	0.25	0.857143	0.871199		tm292/WT	0.803371	0.975369	0.181818	0	0.829268	0.868664
Loss	0.153509	-0.012766	0.666667	0.75	0.142857	0.128801		Loss	0.196629	0.0246305	0.818182	1	0.170732	0.131336
WT vs vlc43	Labial Region	Amphid Region	Anterior Deirid Region	Posterior Deirid Region	Phasmid Region	WORM		WT vs vlc43	Labial Region	Amphid Region	Anterior Deirid Region	Posterior Deirid Region	Phasmid Region	WORM
F	0.95693	0.484244	0.00531776	NA	0.542137	0.375469		F	0.2256	0.481392	NA	1	0.940922	0.0979298
t	2.40096e-09	0.376292	6.92141e-05	NA	5.69642e-05	2.7648e-10		t	7.53557e-09	2.26539e-05	0.0113023	0.5	0.0090909	4.84019e-08
vlc43/WT	0.760234	0.996454	0.123457	0	0.85034	0.809481		vlc43/WT	0.488764	0.64532	0	1	0.804878	0.580645
Loss	0.239766	0.0035461	0.876543	1	0.14966	0.190519		Loss	0.511236	0.35468	1	0	0.195122	0.419355
tm292 vs vlc43	Labial Region	Amphid Region	Anterior Deirid Region	Posterior Deirid Region	Phasmid Region	WORM		tm292 vs vlc43	Labial Region	Amphid Region	Anterior Deirid Region	Posterior Deirid Region	Phasmid Region	WORM
F	0.0592543	0.176975	0.206586	NA	0.789286	0.0731715		F	0.594121	0.147704	NA	NA	0.871768	0.497902
t	0.0120156	0.0662366	0.0219121	0.0260886	0.424596	0.00613075		t	9.00827e-05	1.90831e-05	0.173297	0.173297	0.368033	2.23583e-05
osm-5	Labial Region	Amphid Region	Anterior Deirid Region	Posterior Deirid Region	Phasmid Region	WORM		tub-1	Labial Region	Amphid Region	Anterior Deirid Region	Posterior Deirid Region	Phasmid Region	WORM
WT/cilia	0.171875	0.260417	0.25	0.4375	0.75	0.270833		WT/cilia	0.870833	0.970833	0.46	0.95	0.88	0.88
WT vs tm292	Labial Region	Amphid Region	Anterior Deirid Region	Posterior Deirid Region	Phasmid Region	WORM		WT vs tm292	Labial Region	Amphid Region	Anterior Deirid Region	Posterior Deirid Region	Phasmid Region	WORM
F	5.56764e-07	0.35259	NA	NA	0.832577	0.312399		F	0.126274	0.456859	0.764023	0.0152125	0.234227	0.462672
t	0.000301231	0.140131	0.00263285	0.00309876	0.149821	1.60193e-07		t	0.0259128	0.109043	0.264265	0.0679164	0.172176	0.538178
tm292/WT	0.020202	0.866667	0	0	0.911111	0.548718		tm292/WT	0.899522	1.04721	1.13043	0.631579	1.09091	0.981061
Loss	0.979798	0.133333	1	1	0.0888889	0.451282		Loss	0.100478	-0.0472103	-0.130435	0.368421	-0.0909091	0.0189394
WT vs vlc43	Labial Region	Amphid Region	Anterior Deirid Region	Posterior Deirid Region	Phasmid Region	WORM		WT vs vlc43	Labial Region	Amphid Region	Anterior Deirid Region	Posterior Deirid Region	Phasmid Region	WORM
F	NA	0.363145	NA	NA	0.931932	0.324531		F	0.355028	0.410356	NA	0.356392	NA	0.0422301
t	0.000283756	0.00475166	0.00263285	0.00309876	0.0384207	2.40191e-08		t	0.0127703	0.281967	0.0124232	0.311047	0.0255016	1
vlc43/WT	0	0.64	0	0	0.826667	0.436923		vlc43/WT	0.91866	1.02146	1.30435	0.947368	1.13636	1
Loss	1	0.36	1	1	0.173333	0.563077		Loss	0.0813397	-0.0214592	-0.304348	0.0526316	-0.136364	0
tm292 vs vlc43	Labial Region	Amphid Region	Anterior Deirid Region	Posterior Deirid Region	Phasmid Region	WORM		tm292 vs vlc43	Labial Region	Amphid Region	Anterior Deirid Region	Posterior Deirid Region	Phasmid Region	WORM
F	NA	0.99119	NA	NA	0.745266	0.994104		F	0.0575753	0.940032	NA	0.252401	NA	0.0184011
t	0.1694	0.0427694	NA	NA	0.15186	0.0668157		t	0.371123	0.210403	0.18695	0.0975078	0.18695	0.543158
peli-1S	Labial Region	Amphid Region	Anterior Deirid Region	Posterior Deirid Region	Phasmid Region	WORM		peli-1L	Labial Region	Amphid Region	Anterior Deirid Region	Posterior Deirid Region	Phasmid Region	WORM
WT/cilia	0.279762	0.589286	0	0	0.885714	0.421429		WT/cilia	0.75	0.763889	0.366667	1	0.966667	0.75
WT vs tm292	Labial Region	Amphid Region	Anterior Deirid Region	Posterior Deirid Region	Phasmid Region	WORM		WT vs tm292	Labial Region	Amphid Region	Anterior Deirid Region	Posterior Deirid Region	Phasmid Region	WORM
F	2.15821e-05	0.849138	NA	NA	0.719339	0.805233		F	0.102898	0.454105	0.731839	NA	0.0374984	0.189029
t	0.00998018	0.000979083	NA	NA	0.0398131	4.67258e-05		t	0.44462	0.130759	0.27064	0.181609	0.0468559	0.940202
tm292/WT	0.622824	0.726354	NA	NA	0.821114	0.71546		tm292/WT	1.00926	1.06364	0.818182	0.916667	0.793103	0.996296
Loss	0.377176	0.273646	NA	NA	0.178886	0.28454		Loss	-0.00925926	-0.0636364	0.181818	0.0833333	0.206897	0.0037037
WT vs vlc43	Labial Region	Amphid Region	Anterior Deirid Region	Posterior Deirid Region	Phasmid Region	WORM		WT vs vlc43	Labial Region	Amphid Region	Anterior Deirid Region	Posterior Deirid Region	Phasmid Region	WORM
F	0.0388275	0.927471	NA	NA	0.555053	0.907513		F	0.235035	0.183842	0.355009	NA	0.713231	0.314185
t	0.00141537	1.7677e-07	NA	NA	0.0178356	2.05716e-08		t	0.447131	0.086098	0.367085	NA	0.155088	0.666313
vlc43/WT	0.446809	0.453704	NA	NA	0.827957	0.51742		vlc43/WT	1.00926	1.07273	1.09091	1	0.862069	1.02222
Loss	0.553191	0.546296	NA	NA	0.172043	0.48258		Loss	-0.00925926	-0.0727273	-0.0909091	0	0.137931	-0.0222222
tm292 vs vlc43	Labial Region	Amphid Region	Anterior Deirid Region	Posterior Deirid Region	Phasmid Region	WORM		tm292 vs vlc43	Labial Region	Amphid Region	Anterior Deirid Region	Posterior Deirid Region	Phasmid Region	WORM
F	0.00560472	0.736901	NA	NA	0.266252	0.872501		F	0.625402	0.54172	0.554029	NA	0.0763236	0.742767
t	0.00129155	0.000143741	NA	NA	0.463972	0.000264446		t	0.5	0.408712	0.134998	0.181609	0.230413	0.471247
xbx-1S	Labial Region	Amphid Region	Anterior Deirid Region	Posterior Deirid Region	Phasmid Region	WORM		xbx-1L	Labial Region	Amphid Region	Anterior Deirid Region	Posterior Deirid Region	Phasmid Region	WORM
WT/cilia	0.808333	0.775	0.52	0.8	0.92	0.78		WT/cilia	0.833333	1.00833	0.44	0.6	0.88	0.866667
WT vs tm292	Labial Region	Amphid Region	Anterior Deirid Region	Posterior Deirid Region	Phasmid Region	WORM		WT vs tm292	Labial Region	Amphid Region	Anterior Deirid Region	Posterior Deirid Region	Phasmid Region	WORM
F	0.959705	0.231582	0.557516	0.532356	0.971314	0.809869		F	0.557574	0.135753	0.704	1	0.900148	0.237832
t	0.471744	0.479879	0.00317739	0.000379725	0.148333	0.157577		t	0.201075	0.158767	0.272369	0.033344	0.362233	0.916784
tm292/WT	0.996564	1.00358	0.448718	0.104167	0.869565	0.925926		tm292/WT	1.03	0.958678	1.09091	1.5	0.954545	1.00385
Loss	0.00343643	-0.00358423	0.551282	0.895833	0.130435	0.0740741		Loss	-0.03	0.0413223	-0.0909091	-0.5	0.0454545	-0.00384615
WT vs vlc43	Labial Region	Amphid Region	Anterior Deirid Region	Posterior Deirid Region	Phasmid Region	WORM		WT vs vlc43	Labial Region	Amphid Region	Anterior Deirid Region	Posterior Deirid Region	Phasmid Region	WORM
F	0.584651	0.321635	0.557516	0.431992	0.827218	0.890449		F	0.528506	0.82299	0.803337	0.803337	0.115781	0.146299
t	0.418816	0.129274	0.0455735	0.0165521	0.0519441	0.0470202		t	0.194642	0.00135553	0.073948	0.073948	0.156452	0.0420034
vlc43/WT	0.987973	0.913978	0.705128	0.3125	0.797101	0.900997		vlc43/WT	0.958333	0.812672	1.21212	1.38889	1.09848	0.923077
Loss	0.0120275	0.0860215	0.294872	0.6875	0.202899	0.0990028		Loss	0.0416667	0.187328	-0.212121	-0.388889	-0.0984848	0.0769231
tm292 vs vlc43	Labial Region	Amphid Region	Anterior Deirid Region	Posterior Deirid Region	Phasmid Region	WORM		tm292 vs vlc43	Labial Region	Amphid Region	Anterior Deirid Region	Posterior Deirid Region	Phasmid Region	WORM
F	0.520198	0.822288	1	0.141295	0.846305	0.686097		F	0.228298	0.177365	0.877891	0.803337	0.147461	0.856312
t	0.437667	0.0498998	0.0780272	0.200517	0.257733	0.587745		t	0.0644057	0.00131684	0.213987	0.33089	0.0670717	0.00455904

## Sheet: F3 D
Track	Strain	Reporter	Temperature (º C)	Background	# Worm	ID Worm	Category	Area (mm2)	Mean	IntDen	RawIntDen	CTCF
1	NFB2680	osm-5(syb6528) X	25	wild type	1	10	CEPV1	2.819	2.438	6.87	117	4.88542
2	NFB2680	osm-5(syb6528) X	25	wild type	1	10	CEPV2	2.584	0.955	2.466	42	0.646864
3	NFB2680	osm-5(syb6528) X	25	wild type	1	10	CEPD1	5.696	16.031	91.313	1555	87.303
4	NFB2680	osm-5(syb6528) X	25	wild type	1	10	CEPD2	6.107	27.673	169.002	2878	164.703
5	NFB2680	osm-5(syb6528) X	25	wild type	1	10	ADE1	5.755	12.408	71.406	1216	67.3545
6	NFB2680	osm-5(syb6528) X	25	wild type	1	10	ADE2	5.285	22.9	121.026	2061	117.305
7	NFB2680	osm-5(syb6528) X	25	wild type	1	10	Background	3.171	0.704	2.231	38
8	NFB2680	osm-5(syb6528) X	25	wild type	2	9	CEPV1	7.105	18.81	133.651	2276	127.839
9	NFB2680	osm-5(syb6528) X	25	wild type	2	9	CEPV2	6.518	13.82	90.08	1534	84.7483
10	NFB2680	osm-5(syb6528) X	25	wild type	2	9	CEPD1	4.698	7.6	35.703	608	31.86
11	NFB2680	osm-5(syb6528) X	25	wild type	2	9	CEPD2	4.639	4.861	22.549	384	18.7543
12	NFB2680	osm-5(syb6528) X	25	wild type	2	9	ADE1	5.52	46.053	254.208	4329	249.693
13	NFB2680	osm-5(syb6528) X	25	wild type	2	9	ADE2	2.055	3.771	7.751	132	6.07001
14	NFB2680	osm-5(syb6528) X	25	wild type	2	9	Background	1.938	0.818	1.585	27
15	NFB2680	osm-5(syb6528) X	25	wild type	3	8	CEPV1	5.696	6.113	34.822	593	30.2652
16	NFB2680	osm-5(syb6528) X	25	wild type	3	8	CEPV2	6.459	9.809	63.361	1079	58.1938
17	NFB2680	osm-5(syb6528) X	25	wild type	3	8	CEPD1	5.05	13.663	68.998	1175	64.958
18	NFB2680	osm-5(syb6528) X	25	wild type	3	8	CEPD2	7.986	15.471	123.551	2104	117.162
19	NFB2680	osm-5(syb6528) X	25	wild type	3	8	ADE1	7.164	28.008	200.653	3417	194.922
20	NFB2680	osm-5(syb6528) X	25	wild type	3	8	ADE2	3.817	0.8	3.054	52	0.0004
21	NFB2680	osm-5(syb6528) X	25	wild type	3	8	Background	3.817	0.8	3.054	52
22	NFB2680	osm-5(syb6528) X	25	wild type	4	7	CEPV1	4.756	13.383	63.655	1084	57.9478
23	NFB2680	osm-5(syb6528) X	25	wild type	4	7	CEPV2	3.523	9.75	34.352	585	30.1244
24	NFB2680	osm-5(syb6528) X	25	wild type	4	7	CEPD1	4.815	29.793	143.458	2443	137.68
25	NFB2680	osm-5(syb6528) X	25	wild type	4	7	CEPD2	5.285	25.456	134.532	2291	128.19
26	NFB2680	osm-5(syb6528) X	25	wild type	4	7	ADE1	4.052	15.812	64.066	1091	59.2036
27	NFB2680	osm-5(syb6528) X	25	wild type	4	7	ADE2	3.523	4.867	17.147	292	12.9194
28	NFB2680	osm-5(syb6528) X	25	wild type	4	7	Background	2.936	1.2	3.523	60
29	NFB2680	osm-5(syb6528) X	25	wild type	5	6	CEPV1	4.228	22.167	93.72	1596	86.2322
30	NFB2680	osm-5(syb6528) X	25	wild type	5	6	CEPV2	7.693	22.84	175.696	2992	162.072
31	NFB2680	osm-5(syb6528) X	25	wild type	5	6	CEPD1	4.815	10.195	49.092	836	40.5646
32	NFB2680	osm-5(syb6528) X	25	wild type	5	6	CEPD2	5.755	15.551	89.492	1524	79.2999
33	NFB2680	osm-5(syb6528) X	25	wild type	5	6	ADE1	5.872	63.16	370.888	6316	360.489
34	NFB2680	osm-5(syb6528) X	25	wild type	5	6	ADE2	4.228	12.167	51.441	876	43.9532
35	NFB2680	osm-5(syb6528) X	25	wild type	5	6	Background	5.637	1.771	9.983	170
36	NFB2680	osm-5(syb6528) X	25	wild type	6	5	CEPV1	5.813	21.778	126.605	2156	116.333
37	NFB2680	osm-5(syb6528) X	25	wild type	6	5	CEPV2	6.107	10.01	61.13	1041	50.3389
38	NFB2680	osm-5(syb6528) X	25	wild type	6	5	CEPD1	6.929	31.703	219.679	3741	207.435
39	NFB2680	osm-5(syb6528) X	25	wild type	6	5	CEPD2	3.758	11.516	43.278	737	36.6376
40	NFB2680	osm-5(syb6528) X	25	wild type	6	5	ADE1	6.166	59.81	368.774	6280	357.879
41	NFB2680	osm-5(syb6528) X	25	wild type	6	5	ADE2	6.518	32.252	210.225	3580	198.708
42	NFB2680	osm-5(syb6528) X	25	wild type	6	5	Background	4.287	1.767	7.575	129
43	NFB2680	osm-5(syb6528) X	25	wild type	7	4	CEPV1	8.045	15.453	124.315	2117	119.239
44	NFB2680	osm-5(syb6528) X	25	wild type	7	4	CEPV2	7.751	19.242	149.154	2540	144.263
45	NFB2680	osm-5(syb6528) X	25	wild type	7	4	CEPD1	6.283	24.187	151.973	2588	148.008
46	NFB2680	osm-5(syb6528) X	25	wild type	7	4	CEPD2	5.461	4.806	26.249	447	22.8031
47	NFB2680	osm-5(syb6528) X	25	wild type	7	4	ADE1	7.105	60.521	430.022	7323	425.539
48	NFB2680	osm-5(syb6528) X	25	wild type	7	4	ADE2	6.048	24.699	149.389	2544	145.573
49	NFB2680	osm-5(syb6528) X	25	wild type	7	4	Background	3.817	0.631	2.408	41
50	NFB2680	osm-5(syb6528) X	25	wild type	8	3	CEPV1	6.636	9.876	65.534	1116	62.9327
51	NFB2680	osm-5(syb6528) X	25	wild type	8	3	CEPV2	5.109	7.828	39.99	681	37.9873
52	NFB2680	osm-5(syb6528) X	25	wild type	8	3	CEPD1	7.164	49.27	352.978	6011	350.17
53	NFB2680	osm-5(syb6528) X	25	wild type	8	3	CEPD2	5.872	15.58	91.489	1558	89.1872
54	NFB2680	osm-5(syb6528) X	25	wild type	8	3	ADE1	6.87	16.667	114.508	1950	111.815
55	NFB2680	osm-5(syb6528) X	25	wild type	8	3	ADE2	3.406	4.5	15.326	261	13.9908
56	NFB2680	osm-5(syb6528) X	25	wild type	8	3	Background	2.995	0.392	1.174	20
57	NFB2680	osm-5(syb6528) X	25	wild type	9	11	CEPV1	5.461	34.935	190.788	3249	186.179
58	NFB2680	osm-5(syb6528) X	25	wild type	9	11	CEPV2	5.579	24.074	134.297	2287	129.588
59	NFB2680	osm-5(syb6528) X	25	wild type	9	11	CEPD1	6.283	47.832	300.539	5118	295.236
60	NFB2680	osm-5(syb6528) X	25	wild type	9	11	CEPD2	6.166	16.162	99.651	1697	94.4469
61	NFB2680	osm-5(syb6528) X	25	wild type	9	11	ADE1	5.99	54	323.441	5508	318.385
62	NFB2680	osm-5(syb6528) X	25	wild type	9	11	ADE2	4.991	19.153	95.599	1628	91.3866
63	NFB2680	osm-5(syb6528) X	25	wild type	9	11	Background	2.642	0.844	2.231	38
64	NFB2680	osm-5(syb6528) X	25	wild type	10	12	CEPV1	4.756	16.284	77.454	1319	74.5148
65	NFB2680	osm-5(syb6528) X	25	wild type	10	12	CEPV2	6.166	9.476	58.428	995	54.6174
66	NFB2680	osm-5(syb6528) X	25	wild type	10	12	CEPD1	5.579	36.147	201.652	3434	198.204
67	NFB2680	osm-5(syb6528) X	25	wild type	10	12	CEPD2	6.577	25.607	168.415	2868	164.35
68	NFB2680	osm-5(syb6528) X	25	wild type	10	12	ADE1	6.753	22.07	149.037	2538	144.864
69	NFB2680	osm-5(syb6528) X	25	wild type	10	12	ADE2	3.758	6.562	24.663	420	22.3406
70	NFB2680	osm-5(syb6528) X	25	wild type	10	12	Background	3.23	0.618	1.997	34
71	NFB2680	osm-5(syb6528) X	25	wild type	11	13	CEPV1	5.872	9.89	58.076	989	52.022
72	NFB2680	osm-5(syb6528) X	25	wild type	11	13	CEPV2	6.577	10.161	66.826	1138	60.0451
73	NFB2680	osm-5(syb6528) X	25	wild type	11	13	CEPD1	6.929	14.076	97.537	1661	90.3932
74	NFB2680	osm-5(syb6528) X	25	wild type	11	13	CEPD2	6.401	46.55	297.956	5074	291.357
75	NFB2680	osm-5(syb6528) X	25	wild type	11	13	ADE1	6.459	27.1	175.05	2981	168.391
76	NFB2680	osm-5(syb6528) X	25	wild type	11	13	ADE2	5.872	7.99	46.919	799	40.865
77	NFB2680	osm-5(syb6528) X	25	wild type	11	13	Background	3.758	1.031	3.876	66
78	NFB2680	osm-5(syb6528) X	25	wild type	12	14	CEPV1	5.109	24.989	127.662	2174	121.47
79	NFB2680	osm-5(syb6528) X	25	wild type	12	14	CEPV2	5.579	16.211	90.432	1540	83.6703
80	NFB2680	osm-5(syb6528) X	25	wild type	12	14	CEPD1	4.522	13.104	59.251	1009	53.7703
81	NFB2680	osm-5(syb6528) X	25	wild type	12	14	CEPD2	2.349	5.25	12.332	210	9.48501
82	NFB2680	osm-5(syb6528) X	25	wild type	12	14	ADE1	5.872	45.05	264.543	4505	257.426
83	NFB2680	osm-5(syb6528) X	25	wild type	12	14	ADE2	6.459	75.673	488.802	8324	480.974
84	NFB2680	osm-5(syb6528) X	25	wild type	12	14	Background	3.876	1.212	4.698	80
85	NFB2680	osm-5(syb6528) X	25	wild type	13	15	CEPV1	4.111	20.114	82.681	1408	79.939
86	NFB2680	osm-5(syb6528) X	25	wild type	13	15	CEPV2	4.522	24.247	109.634	1867	106.618
87	NFB2680	osm-5(syb6528) X	25	wild type	13	15	CEPD1	4.698	16.75	78.688	1340	75.5544
88	NFB2680	osm-5(syb6528) X	25	wild type	13	15	CEPD2	4.522	24.753	111.924	1906	108.908
89	NFB2680	osm-5(syb6528) X	25	wild type	13	15	ADE1	6.342	35.509	225.199	3835	220.969
90	NFB2680	osm-5(syb6528) X	25	wild type	13	15	ADE2	2.466	3.143	7.751	132	6.10618
91	NFB2680	osm-5(syb6528) X	25	wild type	13	15	Background	1.233	0.667	0.822	14
92	NFB2680	osm-5(syb6528) X	25	wild type	14	16	CEPV1	3.171	12.222	38.757	660	36.1029
93	NFB2680	osm-5(syb6528) X	25	wild type	14	16	CEPV2	4.404	12.173	53.613	913	49.9269
94	NFB2680	osm-5(syb6528) X	25	wild type	14	16	CEPD1	2.819	2.688	7.575	129	5.2155
95	NFB2680	osm-5(syb6528) X	25	wild type	14	16	CEPD2	3.171	59.056	187.265	3189	184.611
96	NFB2680	osm-5(syb6528) X	25	wild type	14	16	ADE1	4.756	22.506	107.05	1823	103.069
97	NFB2680	osm-5(syb6528) X	25	wild type	14	16	ADE2	1.409	4.667	6.577	112	5.39767
98	NFB2680	osm-5(syb6528) X	25	wild type	14	17	Background	2.525	0.837	2.114	36
99	NFB2680	osm-5(syb6528) X	25	wild type	15	17	CEPV1	4.522	13.519	61.13	1041	57.6119
100	NFB2680	osm-5(syb6528) X	25	wild type	15	17	CEPV2	4.522	8.558	38.698	659	35.1799
101	NFB2680	osm-5(syb6528) X	25	wild type	15	17	CEPD1	6.577	27.312	179.631	3059	174.514
102	NFB2680	osm-5(syb6528) X	25	wild type	15	17	CEPD2	5.813	26.505	154.087	2624	149.564
103	NFB2680	osm-5(syb6528) X	25	wild type	15	17	ADE1	4.815	7.476	35.997	613	32.2509
104	NFB2680	osm-5(syb6528) X	25	wild type	15	17	ADE2	6.107	11.587	70.76	1205	66.0088
105	NFB2680	osm-5(syb6528) X	25	wild type	15	17	Background	5.813	0.778	4.522	77
106	NFB2680	osm-5(syb6528) X	25	wild type	16	18	CEPV1	6.577	27.607	181.569	3092	178.583
107	NFB2680	osm-5(syb6528) X	25	wild type	16	18	CEPV2	7.34	18.784	137.879	2348	134.547
108	NFB2680	osm-5(syb6528) X	25	wild type	16	18	CEPD1	6.225	16.16	100.591	1713	97.7648
109	NFB2680	osm-5(syb6528) X	25	wild type	16	18	CEPD2	4.815	15.012	72.287	1231	70.101
110	NFB2680	osm-5(syb6528) X	25	wild type	16	18	ADE1	5.344	30.703	164.069	2794	161.643
111	NFB2680	osm-5(syb6528) X	25	wild type	16	18	ADE2	5.931	42.525	252.211	4295	249.518
112	NFB2680	osm-5(syb6528) X	25	wild type	16	18	Background	5.696	0.454	2.584	44
113	NFB2680	osm-5(syb6528) X	25	wild type	17	20	CEPV1	3.876	7.485	29.009	494	28.0206
114	NFB2680	osm-5(syb6528) X	25	wild type	17	20	CEPV2	3.23	5.418	17.499	298	16.6753
115	NFB2680	osm-5(syb6528) X	25	wild type	17	20	CEPD1	4.404	26.36	116.093	1977	114.97
116	NFB2680	osm-5(syb6528) X	25	wild type	17	20	CEPD2	5.931	12.297	72.933	1242	71.4206
117	NFB2680	osm-5(syb6528) X	25	wild type	17	20	ADE1	6.518	20.081	130.891	2229	129.229
118	NFB2680	osm-5(syb6528) X	25	wild type	17	20	ADE2	3.641	5.645	20.553	350	19.6245
119	NFB2680	osm-5(syb6528) X	25	wild type	17	20	Background	3.23	0.255	0.822	14
120	NFB2680	osm-5(syb6528) X	25	wild type	18	21	CEPV1	6.518	19.288	125.724	2141	122.498
121	NFB2680	osm-5(syb6528) X	25	wild type	18	21	CEPV2	5.109	15.471	79.04	1346	76.511
122	NFB2680	osm-5(syb6528) X	25	wild type	18	21	CEPD1	2.525	3.744	9.454	161	8.20413
123	NFB2680	osm-5(syb6528) X	25	wild type	18	21	CEPD2	3.758	9.094	34.176	582	32.3158
124	NFB2680	osm-5(syb6528) X	25	wild type	18	21	ADE1	3.054	11.558	35.292	601	33.7803
125	NFB2680	osm-5(syb6528) X	25	wild type	18	21	ADE2	6.753	43.835	296.018	5041	292.675
126	NFB2680	osm-5(syb6528) X	25	wild type	18	21	Background	6.401	0.495	3.171	54
127	NFB2680	osm-5(syb6528) X	25	wild type	19	22	CEPV1	7.751	14.803	114.743	1954	111.643
128	NFB2680	osm-5(syb6528) X	25	wild type	19	22	CEPV2	7.869	24.627	193.783	3300	190.635
129	NFB2680	osm-5(syb6528) X	25	wild type	19	22	CEPD1	4.228	7.667	32.415	552	30.7238
130	NFB2680	osm-5(syb6528) X	25	wild type	19	22	CEPD2	5.226	9.247	48.328	823	46.2376
131	NFB2680	osm-5(syb6528) X	25	wild type	19	22	ADE1	6.577	34.723	228.37	3889	225.739
132	NFB2680	osm-5(syb6528) X	25	wild type	19	22	ADE2	7.105	39.322	279.4	4758	276.558
133	NFB2680	osm-5(syb6528) X	25	wild type	19	22	Background	3.23	0.4	1.292	22
134	NFB2680	osm-5(syb6528) X	25	wild type	20	23	CEPV1	6.518	22.216	144.809	2466	141.498
135	NFB2680	osm-5(syb6528) X	25	wild type	20	23	CEPV2	6.459	29.282	189.144	3221	185.863
136	NFB2680	osm-5(syb6528) X	25	wild type	20	23	CEPD1	4.991	16.871	84.207	1434	81.6716
137	NFB2680	osm-5(syb6528) X	25	wild type	20	23	CEPD2	4.698	16.975	79.745	1358	77.3584
138	NFB2680	osm-5(syb6528) X	25	wild type	20	23	ADE1	5.872	18.77	110.221	1877	107.238
139	NFB2680	osm-5(syb6528) X	25	wild type	20	23	ADE2	6.283	8.065	50.677	863	47.4852
140	NFB2680	osm-5(syb6528) X	25	wild type	20	23	Background	10.629	0.508	5.402	92
141	NFB2681	osm-5(syb6528) X	25	fkh-8(vlc43) II	1	1	CEPV1	5.637	8.458	47.682	812	43.8037
142	NFB2681	osm-5(syb6528) X	25	fkh-8(vlc43) II	1	1	CEPV2	4.698	6.225	29.244	498	26.0118
143	NFB2681	osm-5(syb6528) X	25	fkh-8(vlc43) II	1	1	CEPD1	3.523	2.833	9.983	170	7.55918
144	NFB2681	osm-5(syb6528) X	25	fkh-8(vlc43) II	1	1	CEPD2	4.522	5.974	27.012	460	23.9009
145	NFB2681	osm-5(syb6528) X	25	fkh-8(vlc43) II	1	1	ADE1	3.641	1.548	5.637	96	3.13199
146	NFB2681	osm-5(syb6528) X	25	fkh-8(vlc43) II	1	1	ADE2	5.226	9.876	51.617	879	48.0215
147	NFB2681	osm-5(syb6528) X	25	fkh-8(vlc43) II	1	1	Background	3.758	0.688	2.584	44
148	NFB2681	osm-5(syb6528) X	25	fkh-8(vlc43) II	2	2	CEPV1	6.225	3.962	24.663	420	21.3202
149	NFB2681	osm-5(syb6528) X	25	fkh-8(vlc43) II	2	2	CEPV2	4.463	2.421	10.805	184	8.40837
150	NFB2681	osm-5(syb6528) X	25	fkh-8(vlc43) II	2	2	CEPD1	6.518	10.279	67.002	1141	63.5018
151	NFB2681	osm-5(syb6528) X	25	fkh-8(vlc43) II	2	2	CEPD2	3.054	7.462	22.784	388	21.144
152	NFB2681	osm-5(syb6528) X	25	fkh-8(vlc43) II	2	2	ADE1	4.111	4.786	19.672	335	17.4644
153	NFB2681	osm-5(syb6528) X	25	fkh-8(vlc43) II	2	2	ADE2	4.111	1.086	4.463	76	2.25539
154	NFB2681	osm-5(syb6528) X	25	fkh-8(vlc43) II	2	2	Background	3.934	0.537	2.114	36
155	NFB2681	osm-5(syb6528) X	25	fkh-8(vlc43) II	3	3	CEPV1	5.109	8.862	45.275	771	42.603
156	NFB2681	osm-5(syb6528) X	25	fkh-8(vlc43) II	3	3	CEPV2	4.639	8.051	37.347	636	34.9208
157	NFB2681	osm-5(syb6528) X	25	fkh-8(vlc43) II	3	3	CEPD1	4.698	11.075	52.028	886	49.5709
158	NFB2681	osm-5(syb6528) X	25	fkh-8(vlc43) II	3	3	CEPD2	4.756	7.321	34.822	593	32.3346
159	NFB2681	osm-5(syb6528) X	25	fkh-8(vlc43) II	3	3	ADE1	5.402	11.337	61.247	1043	58.4218
160	NFB2681	osm-5(syb6528) X	25	fkh-8(vlc43) II	3	3	ADE2	3.699	1.476	5.461	93	3.52642
161	NFB2681	osm-5(syb6528) X	25	fkh-8(vlc43) II	3	3	Background	6.283	0.523	3.288	56
162	NFB2681	osm-5(syb6528) X	25	fkh-8(vlc43) II	4	4	CEPV1	4.169	3.465	14.446	246	8.11329
163	NFB2681	osm-5(syb6528) X	25	fkh-8(vlc43) II	4	4	CEPV2	4.111	4.943	20.318	346	14.0734
164	NFB2681	osm-5(syb6528) X	25	fkh-8(vlc43) II	4	4	CEPD1	4.052	3.681	14.915	254	8.76001
165	NFB2681	osm-5(syb6528) X	25	fkh-8(vlc43) II	4	4	CEPD2	6.401	7.468	47.8	814	38.0769
166	NFB2681	osm-5(syb6528) X	25	fkh-8(vlc43) II	4	4	ADE1	9.513	5.395	51.323	874	36.8728
167	NFB2681	osm-5(syb6528) X	25	fkh-8(vlc43) II	4	4	ADE2	9.161	1.519	13.917	237	0.001441
168	NFB2681	osm-5(syb6528) X	25	fkh-8(vlc43) II	4	4	Background	9.161	1.519	13.917	237
169	NFB2681	osm-5(syb6528) X	25	fkh-8(vlc43) II	5	5	CEPV1	5.755	6.112	35.175	599	31.8083
170	NFB2681	osm-5(syb6528) X	25	fkh-8(vlc43) II	5	5	CEPV2	4.463	4.895	21.845	372	19.2341
171	NFB2681	osm-5(syb6528) X	25	fkh-8(vlc43) II	5	5	CEPD1	6.636	11.416	75.751	1290	71.8689
172	NFB2681	osm-5(syb6528) X	25	fkh-8(vlc43) II	5	5	CEPD2	5.872	6.93	40.694	693	37.2589
173	NFB2681	osm-5(syb6528) X	25	fkh-8(vlc43) II	5	5	ADE1	2.466	1.238	3.054	52	1.61139
174	NFB2681	osm-5(syb6528) X	25	fkh-8(vlc43) II	5	5	ADE2	4.874	7.012	34.176	582	31.3247
175	NFB2681	osm-5(syb6528) X	25	fkh-8(vlc43) II	5	5	Background	4.815	0.585	2.819	48
176	NFB2681	osm-5(syb6528) X	25	fkh-8(vlc43) II	6	6	CEPV1	5.99	3.647	21.845	372	13.3751
177	NFB2681	osm-5(syb6528) X	25	fkh-8(vlc43) II	6	6	CEPV2	5.99	3.98	23.841	406	15.3711
178	NFB2681	osm-5(syb6528) X	25	fkh-8(vlc43) II	6	6	CEPD1	6.401	12.853	82.27	1401	73.219
179	NFB2681	osm-5(syb6528) X	25	fkh-8(vlc43) II	6	6	CEPD2	5.109	9.552	48.798	831	41.5739
180	NFB2681	osm-5(syb6528) X	25	fkh-8(vlc43) II	6	6	ADE1	2.76	5.532	15.268	260	11.3654
181	NFB2681	osm-5(syb6528) X	25	fkh-8(vlc43) II	6	6	ADE2	2.642	1.511	3.993	68	0.257212
182	NFB2681	osm-5(syb6528) X	25	fkh-8(vlc43) II	6	6	Background	4.111	1.414	5.813	99
183	NFB2681	osm-5(syb6528) X	25	fkh-8(vlc43) II	7	7	CEPV1	5.99	6.961	41.693	710	38.081
184	NFB2681	osm-5(syb6528) X	25	fkh-8(vlc43) II	7	7	CEPV2	4.052	6.652	26.953	459	24.5096
185	NFB2681	osm-5(syb6528) X	25	fkh-8(vlc43) II	7	7	CEPD1	5.579	12.589	70.232	1196	66.8679
186	NFB2681	osm-5(syb6528) X	25	fkh-8(vlc43) II	7	7	CEPD2	3.641	12.258	44.629	760	42.4335
187	NFB2681	osm-5(syb6528) X	25	fkh-8(vlc43) II	7	7	ADE1	1.938	3.03	5.872	100	4.70339
188	NFB2681	osm-5(syb6528) X	25	fkh-8(vlc43) II	7	7	ADE2	1.879	1.406	2.642	45	1.50896
189	NFB2681	osm-5(syb6528) X	25	fkh-8(vlc43) II	7	7	Background	3.699	0.603	2.231	38
190	NFB2681	osm-5(syb6528) X	25	fkh-8(vlc43) II	8	8	CEPV1	3.641	5.855	21.316	363	19.9506
191	NFB2681	osm-5(syb6528) X	25	fkh-8(vlc43) II	8	8	CEPV2	1.997	3.471	6.929	118	6.18013
192	NFB2681	osm-5(syb6528) X	25	fkh-8(vlc43) II	8	8	CEPD1	4.111	9.7	39.872	679	38.3304
193	NFB2681	osm-5(syb6528) X	25	fkh-8(vlc43) II	8	8	CEPD2	3.641	5.774	21.022	358	19.6566
194	NFB2681	osm-5(syb6528) X	25	fkh-8(vlc43) II	8	8	ADE1	5.637	8.333	46.978	800	44.8641
195	NFB2681	osm-5(syb6528) X	25	fkh-8(vlc43) II	8	8	ADE2	2.408	0.488	1.174	20	0.271
196	NFB2681	osm-5(syb6528) X	25	fkh-8(vlc43) II	8	8	Background	3.758	0.375	1.409	24
197	NFB2681	osm-5(syb6528) X	25	fkh-8(vlc43) II	9	10	CEPV1	7.164	12.066	86.439	1472	78.9884
198	NFB2681	osm-5(syb6528) X	25	fkh-8(vlc43) II	9	10	CEPV2	6.283	11.486	72.169	1229	65.6347
199	NFB2681	osm-5(syb6528) X	25	fkh-8(vlc43) II	9	10	CEPD1	2.525	5.674	14.328	244	11.702
200	NFB2681	osm-5(syb6528) X	25	fkh-8(vlc43) II	9	10	CEPD2	3.876	8.818	34.176	582	30.145
201	NFB2681	osm-5(syb6528) X	25	fkh-8(vlc43) II	9	10	ADE1	5.285	9.433	49.855	849	44.3586
202	NFB2681	osm-5(syb6528) X	25	fkh-8(vlc43) II	9	10	ADE2	2.877	4.612	13.271	226	10.2789
203	NFB2681	osm-5(syb6528) X	25	fkh-8(vlc43) II	9	10	Background	4.404	1.04	4.58	78
204	NFB2681	osm-5(syb6528) X	25	fkh-8(vlc43) II	10	11	CEPV1	7.693	6.412	49.327	840	45.0112
205	NFB2681	osm-5(syb6528) X	25	fkh-8(vlc43) II	10	11	CEPV2	6.577	10.08	66.297	1129	62.6073
206	NFB2681	osm-5(syb6528) X	25	fkh-8(vlc43) II	10	11	CEPD1	3.641	3.355	12.214	208	10.1714
207	NFB2681	osm-5(syb6528) X	25	fkh-8(vlc43) II	10	11	CEPD2	4.111	4.3	17.675	301	15.3687
208	NFB2681	osm-5(syb6528) X	25	fkh-8(vlc43) II	10	11	ADE1	4.991	8.741	43.63	743	40.83
209	NFB2681	osm-5(syb6528) X	25	fkh-8(vlc43) II	10	11	ADE2	2.466	2.81	6.929	118	5.54557
210	NFB2681	osm-5(syb6528) X	25	fkh-8(vlc43) II	10	11	Background	3.347	0.561	1.879	32
211	NFB2681	osm-5(syb6528) X	25	fkh-8(vlc43) II	11	13	CEPV1	5.402	8.707	47.036	801	43.6327
212	NFB2681	osm-5(syb6528) X	25	fkh-8(vlc43) II	11	13	CEPV2	7.047	11.867	83.62	1424	79.1804
213	NFB2681	osm-5(syb6528) X	25	fkh-8(vlc43) II	11	13	CEPD1	5.52	4.702	25.955	442	22.4774
214	NFB2681	osm-5(syb6528) X	25	fkh-8(vlc43) II	11	13	CEPD2	5.579	8.095	45.157	769	41.6422
215	NFB2681	osm-5(syb6528) X	25	fkh-8(vlc43) II	11	13	ADE1	5.579	9.084	50.677	863	47.1622
216	NFB2681	osm-5(syb6528) X	25	fkh-8(vlc43) II	11	13	ADE2	3.758	2.25	8.456	144	6.08846
217	NFB2681	osm-5(syb6528) X	25	fkh-8(vlc43) II	11	13	Background	4.287	0.63	2.701	46
218	NFB2681	osm-5(syb6528) X	25	fkh-8(vlc43) II	12	14	CEPV1	7.282	12.508	91.078	1551	85.3398
219	NFB2681	osm-5(syb6528) X	25	fkh-8(vlc43) II	12	14	CEPV2	5.52	12.128	66.943	1140	62.5932
220	NFB2681	osm-5(syb6528) X	25	fkh-8(vlc43) II	12	14	CEPD1	3.054	4.231	12.919	220	10.5124
221	NFB2681	osm-5(syb6528) X	25	fkh-8(vlc43) II	12	14	CEPD2	3.582	6.59	23.606	402	20.7834
222	NFB2681	osm-5(syb6528) X	25	fkh-8(vlc43) II	12	14	ADE1	5.579	6.568	36.643	624	32.2467
223	NFB2681	osm-5(syb6528) X	25	fkh-8(vlc43) II	12	14	ADE2	5.168	15.841	81.859	1394	77.7866
224	NFB2681	osm-5(syb6528) X	25	fkh-8(vlc43) II	12	14	Background	1.938	0.788	1.527	26
225	NFB2681	osm-5(syb6528) X	25	fkh-8(vlc43) II	13	15	CEPV1	5.461	11.634	63.537	1082	62.1062
226	NFB2681	osm-5(syb6528) X	25	fkh-8(vlc43) II	13	15	CEPV2	5.52	8.138	44.922	765	43.4758
227	NFB2681	osm-5(syb6528) X	25	fkh-8(vlc43) II	13	15	CEPD1	3.934	7	27.541	469	26.5103
228	NFB2681	osm-5(syb6528) X	25	fkh-8(vlc43) II	13	15	CEPD2	1.938	3.061	5.931	101	5.42324
229	NFB2681	osm-5(syb6528) X	25	fkh-8(vlc43) II	13	15	ADE1	5.461	14.527	79.333	1351	77.9022
230	NFB2681	osm-5(syb6528) X	25	fkh-8(vlc43) II	13	15	ADE2	2.877	1.469	4.228	72	3.47423
231	NFB2681	osm-5(syb6528) X	25	fkh-8(vlc43) II	13	15	Background	3.582	0.262	0.94	16
232	NFB2681	osm-5(syb6528) X	25	fkh-8(vlc43) II	14	16	CEPV1	4.639	6.899	32.004	545	30.4267
233	NFB2681	osm-5(syb6528) X	25	fkh-8(vlc43) II	14	16	CEPV2	4.815	5.793	27.893	475	26.2559
234	NFB2681	osm-5(syb6528) X	25	fkh-8(vlc43) II	14	16	CEPD1	5.755	10.265	59.074	1006	57.1173
235	NFB2681	osm-5(syb6528) X	25	fkh-8(vlc43) II	14	16	CEPD2	2.877	11.102	31.945	544	30.9668
236	NFB2681	osm-5(syb6528) X	25	fkh-8(vlc43) II	14	16	ADE1	6.342	5.639	35.762	609	33.6057
237	NFB2681	osm-5(syb6528) X	25	fkh-8(vlc43) II	14	16	ADE2	3.406	0.586	1.997	34	0.83896
238	NFB2681	osm-5(syb6528) X	25	fkh-8(vlc43) II	14	16	Background	2.76	0.34	0.94	16
239	NFB2681	osm-5(syb6528) X	25	fkh-8(vlc43) II	15	17	CEPV1	6.812	11.164	76.045	1295	73.5041
240	NFB2681	osm-5(syb6528) X	25	fkh-8(vlc43) II	15	17	CEPV2	6.048	7.699	46.567	793	44.3111
241	NFB2681	osm-5(syb6528) X	25	fkh-8(vlc43) II	15	17	CEPD1	4.522	7.026	31.769	541	30.0823
242	NFB2681	osm-5(syb6528) X	25	fkh-8(vlc43) II	15	17	CEPD2	4.874	4.193	20.435	348	18.617
243	NFB2681	osm-5(syb6528) X	25	fkh-8(vlc43) II	15	17	ADE1	4.639	8.671	40.225	685	38.4947
244	NFB2681	osm-5(syb6528) X	25	fkh-8(vlc43) II	15	17	ADE2	3.641	3.065	11.157	190	9.79891
245	NFB2681	osm-5(syb6528) X	25	fkh-8(vlc43) II	15	17	Background	4.404	0.373	1.644	28
246	NFB2681	osm-5(syb6528) X	25	fkh-8(vlc43) II	16	18	CEPV1	6.694	12.07	80.802	1376	78.0441
247	NFB2681	osm-5(syb6528) X	25	fkh-8(vlc43) II	16	18	CEPV2	5.696	9.907	56.432	961	54.0852
248	NFB2681	osm-5(syb6528) X	25	fkh-8(vlc43) II	16	18	CEPD1	7.047	3.667	25.838	440	22.9346
249	NFB2681	osm-5(syb6528) X	25	fkh-8(vlc43) II	16	18	CEPD2	4.58	5.987	27.423	467	25.536
250	NFB2681	osm-5(syb6528) X	25	fkh-8(vlc43) II	16	18	ADE1	5.872	10.52	61.776	1052	59.3567
251	NFB2681	osm-5(syb6528) X	25	fkh-8(vlc43) II	16	18	ADE2	4.287	3.082	13.212	225	11.4458
252	NFB2681	osm-5(syb6528) X	25	fkh-8(vlc43) II	16	18	Background	1.997	0.412	0.822	14
253	NFB2681	osm-5(syb6528) X	25	fkh-8(vlc43) II	17	20	CEPV1	6.518	5.441	35.468	604	33.4018
254	NFB2681	osm-5(syb6528) X	25	fkh-8(vlc43) II	17	20	CEPV2	7.927	2.911	23.078	393	20.5651
255	NFB2681	osm-5(syb6528) X	25	fkh-8(vlc43) II	17	20	CEPD1	7.34	12.88	94.543	1610	92.2162
256	NFB2681	osm-5(syb6528) X	25	fkh-8(vlc43) II	17	20	CEPD2	6.166	6.095	37.582	640	35.6274
257	NFB2681	osm-5(syb6528) X	25	fkh-8(vlc43) II	17	20	ADE1	5.285	2.011	10.629	181	8.95365
258	NFB2681	osm-5(syb6528) X	25	fkh-8(vlc43) II	17	20	ADE2	8.632	1.231	10.629	181	7.89266
259	NFB2681	osm-5(syb6528) X	25	fkh-8(vlc43) II	17	20	Background	5.931	0.317	1.879	32
260	NFB2681	osm-5(syb6528) X	25	fkh-8(vlc43) II	18	21	CEPV1	2.995	3.569	10.687	182	10.1479
261	NFB2681	osm-5(syb6528) X	25	fkh-8(vlc43) II	18	21	CEPV2	2.877	3.49	10.041	171	9.52314
262	NFB2681	osm-5(syb6528) X	25	fkh-8(vlc43) II	18	21	CEPD1	4.639	12.013	55.727	949	54.892
263	NFB2681	osm-5(syb6528) X	25	fkh-8(vlc43) II	18	21	CEPD2	5.285	12.033	63.596	1083	62.6447
264	NFB2681	osm-5(syb6528) X	25	fkh-8(vlc43) II	18	21	ADE1	4.111	1.129	4.639	79	3.89902
265	NFB2681	osm-5(syb6528) X	25	fkh-8(vlc43) II	18	21	ADE2	5.226	0.82	4.287	73	3.34632
266	NFB2681	osm-5(syb6528) X	25	fkh-8(vlc43) II	18	21	Background	5.226	0.18	0.94	16
267	NFB2681	osm-5(syb6528) X	25	fkh-8(vlc43) II	19	22	CEPV1	5.109	9.747	49.796	848	47.1546
268	NFB2681	osm-5(syb6528) X	25	fkh-8(vlc43) II	19	22	CEPV2	5.402	10.467	56.549	963	53.7562
269	NFB2681	osm-5(syb6528) X	25	fkh-8(vlc43) II	19	22	CEPD1	5.344	6.022	32.18	548	29.4172
270	NFB2681	osm-5(syb6528) X	25	fkh-8(vlc43) II	19	22	CEPD2	4.463	4.658	20.788	354	18.4806
271	NFB2681	osm-5(syb6528) X	25	fkh-8(vlc43) II	19	22	ADE1	3.641	0.677	2.466	42	0.583603
272	NFB2681	osm-5(syb6528) X	25	fkh-8(vlc43) II	19	22	ADE2	5.696	10.155	57.841	985	54.8962
273	NFB2681	osm-5(syb6528) X	25	fkh-8(vlc43) II	19	22	Background	8.397	0.517	4.345	74
274	NFB2681	osm-5(syb6528) X	25	fkh-8(vlc43) II	20	23	CEPV1	7.105	11.719	83.268	1418	79.7155
275	NFB2681	osm-5(syb6528) X	25	fkh-8(vlc43) II	20	23	CEPV2	5.344	13.495	72.111	1228	69.439
276	NFB2681	osm-5(syb6528) X	25	fkh-8(vlc43) II	20	23	CEPD1	6.342	3.5	22.197	378	19.026
277	NFB2681	osm-5(syb6528) X	25	fkh-8(vlc43) II	20	23	CEPD2	3.523	4.4	15.503	264	13.7415
278	NFB2681	osm-5(syb6528) X	25	fkh-8(vlc43) II	20	23	ADE1	4.991	6.671	33.295	567	30.7995
279	NFB2681	osm-5(syb6528) X	25	fkh-8(vlc43) II	20	23	ADE2	5.52	7.713	42.573	725	39.813
280	NFB2681	osm-5(syb6528) X	25	fkh-8(vlc43) II	20	23	Background	4.933	0.5	2.466	42
281	NFB2680	osm-5(syb6528) X	25	wild type	1	1	PDE	5.569	5.045	28.098	21095	27.2571
282	NFB2680	osm-5(syb6528) X	25	wild type	1	1	Background	5.569	0.151	0.843	633
283	NFB2680	osm-5(syb6528) X	25	wild type	2	3	PDE	5.32	7.012	37.302	28005	34.7378
284	NFB2680	osm-5(syb6528) X	25	wild type	2	3	Background	5.32	0.482	2.565	1926
285	NFB2680	osm-5(syb6528) X	25	wild type	3	4	PDE	5.682	11.267	64.024	48067	59.2057
286	NFB2680	osm-5(syb6528) X	25	wild type	3	4	Background	5.682	0.848	4.82	3619
287	NFB2680	osm-5(syb6528) X	25	wild type	4	5	PDE	4.384	13.227	57.98	43529	55.4417
288	NFB2680	osm-5(syb6528) X	25	wild type	4	5	Background	4.384	0.579	2.536	1904
289	NFB2680	osm-5(syb6528) X	25	wild type	5	6	PDE	6.011	20.019	120.342	90348	115.425
290	NFB2680	osm-5(syb6528) X	25	wild type	5	6	Background	6.011	0.818	4.919	3693
291	NFB2680	osm-5(syb6528) X	25	wild type	6	7	PDE	6.027	26.093	157.269	118071	152.303
292	NFB2680	osm-5(syb6528) X	25	wild type	6	7	Background	6.027	0.824	4.966	3728
293	NFB2680	osm-5(syb6528) X	25	wild type	7	8	PDE	5.942	14.588	86.679	65075	80.6776
294	NFB2680	osm-5(syb6528) X	25	wild type	7	8	Background	5.942	1.01	5.999	4504
295	NFB2680	osm-5(syb6528) X	25	wild type	8	9	PDE	4.27	11.644	49.724	37331	46.4446
296	NFB2680	osm-5(syb6528) X	25	wild type	8	9	Background	4.27	0.768	3.278	2461
297	NFB2680	osm-5(syb6528) X	25	wild type	9	10	PDE	4.926	20.598	101.461	76173	97.5842
298	NFB2680	osm-5(syb6528) X	25	wild type	9	10	Background	4.926	0.787	3.877	2911
299	NFB2680	osm-5(syb6528) X	25	wild type	10	11	PDE	5.407	23.629	127.749	95909	123.764
300	NFB2680	osm-5(syb6528) X	25	wild type	10	11	Background	5.407	0.737	3.985	2992
301	NFB2680	osm-5(syb6528) X	25	wild type	11	13	PDE	5.574	8.832	49.235	36964	45.4335
302	NFB2680	osm-5(syb6528) X	25	wild type	11	13	Background	5.574	0.682	3.803	2855
303	NFB2680	osm-5(syb6528) X	25	wild type	12	14	PDE	4.274	14.079	60.179	45180	56.5205
304	NFB2680	osm-5(syb6528) X	25	wild type	12	14	Background	4.274	0.856	3.659	2747
305	NFB2680	osm-5(syb6528) X	25	wild type	13	15	PDE	4.77	7.732	36.881	27689	34.372
306	NFB2680	osm-5(syb6528) X	25	wild type	13	15	Background	4.77	0.526	2.511	1885
307	NFB2680	osm-5(syb6528) X	25	wild type	14	16	PDE	4.531	17.057	77.291	58027	73.3083
308	NFB2680	osm-5(syb6528) X	25	wild type	14	16	Background	4.531	0.879	3.981	2989
309	NFB2680	osm-5(syb6528) X	25	wild type	15	17	PDE	4.337	12.02	52.129	39136	48.551
310	NFB2680	osm-5(syb6528) X	25	wild type	15	17	Background	4.337	0.825	3.579	2687
311	NFB2680	osm-5(syb6528) X	25	wild type	16	18	PDE	6.023	16.14	97.213	72984	92.0754
312	NFB2680	osm-5(syb6528) X	25	wild type	16	18	Background	6.023	0.853	5.14	3859
313	NFB2680	osm-5(syb6528) X	25	wild type	17	19	PDE	5.399	18.098	97.704	73352	91.7435
314	NFB2680	osm-5(syb6528) X	25	wild type	17	19	Background	5.399	1.104	5.961	4475
315	NFB2680	osm-5(syb6528) X	25	wild type	18	20	PDE	5.303	15.922	84.43	63387	80.527
316	NFB2680	osm-5(syb6528) X	25	wild type	18	20	Background	5.303	0.736	3.904	2931
317	NFB2680	osm-5(syb6528) X	25	wild type	19	22	PDE	6.549	6.843	44.816	33646	39.9566
318	NFB2680	osm-5(syb6528) X	25	wild type	19	22	Background	6.549	0.742	4.858	3647000
319	NFB2680	osm-5(syb6528) X	25	wild type	20	23	PDE	4.393	13.646	59.946	45005	56.3174
320	NFB2680	osm-5(syb6528) X	25	wild type	20	23	Background	4.393	0.826	3.628	2724
321	NFB2680	osm-5(syb6528) X	25	wild type	21	24	PDE	6.332	20.183	127.805	95951	121.625
322	NFB2680	osm-5(syb6528) X	25	wild type	21	24	Background	6.332	0.976	6.179	4639
323	NFB2680	osm-5(syb6528) X	25	wild type	22	25	PDE	6.102	25.144	153.426	115186	148.465
324	NFB2680	osm-5(syb6528) X	25	wild type	22	25	Background	6.102	0.813	4.959	3723
325	NFB2680	osm-5(syb6528) X	25	wild type	23	26	PDE	4.851	13.981	67.825	50920	65.0842
326	NFB2680	osm-5(syb6528) X	25	wild type	23	26	Background	4.851	0.565	2.743	2059
327	NFB2680	osm-5(syb6528) X	25	wild type	24	27	PDE	4.792	13.65	65.418	49113	63.0651
328	NFB2680	osm-5(syb6528) X	25	wild type	24	27	Background	4.792	0.491	2.354	1767
329	NFB2681	osm-5(syb6528) X	25	fkh-8(vlc43) II	1	21	PDE	5.751	2.626	15.1	7176	11.4136
330	NFB2681	osm-5(syb6528) X	25	fkh-8(vlc43) II	1	21	Background	5.751	0.641	3.687	1752
331	NFB2681	osm-5(syb6528) X	25	fkh-8(vlc43) II	2	28	PDE	6.868	1.868	12.829	6097	7.98019
332	NFB2681	osm-5(syb6528) X	25	fkh-8(vlc43) II	2	28	Background	6.868	0.706	4.848	2304
333	NFB2681	osm-5(syb6528) X	25	fkh-8(vlc43) II	3	29	PDE	6.094	2.024	12.335	5862	9.07471
334	NFB2681	osm-5(syb6528) X	25	fkh-8(vlc43) II	3	29	Background	6.094	0.535	3.257	1548
335	NFB2681	osm-5(syb6528) X	25	fkh-8(vlc43) II	4	30	PDE	4.852	2.646	12.84	6102	9.24467
336	NFB2681	osm-5(syb6528) X	25	fkh-8(vlc43) II	4	30	Background	4.852	0.741	3.596	1709
337	NFB2681	osm-5(syb6528) X	25	fkh-8(vlc43) II	5	31	PDE	5.707	3.003	17.139	8145	13.3381
338	NFB2681	osm-5(syb6528) X	25	fkh-8(vlc43) II	5	31	Background	5.707	0.666	3.802	1807
339	NFB2681	osm-5(syb6528) X	25	fkh-8(vlc43) II	6	32	PDE	5.397	2.098	11.325	5382	8.54015
340	NFB2681	osm-5(syb6528) X	25	fkh-8(vlc43) II	6	32	Background	5.397	0.516	2.784	1323
341	NFB2681	osm-5(syb6528) X	25	fkh-8(vlc43) II	7	33	PDE	4.976	2.526	12.573	5975	9.92577
342	NFB2681	osm-5(syb6528) X	25	fkh-8(vlc43) II	7	33	Background	4.976	0.532	2.649	1259
343	NFB2681	osm-5(syb6528) X	25	fkh-8(vlc43) II	8	34	PDE	4.575	2.122	9.707	4613	6.71495
344	NFB2681	osm-5(syb6528) X	25	fkh-8(vlc43) II	8	34	Background	4.575	0.654	2.992	1422
345	NFB2681	osm-5(syb6528) X	25	fkh-8(vlc43) II	9	35	PDE	5.13	2.604	13.36	6349	9.76387
346	NFB2681	osm-5(syb6528) X	25	fkh-8(vlc43) II	9	35	Background	5.13	0.701	3.596	1709
347	NFB2681	osm-5(syb6528) X	25	fkh-8(vlc43) II	10	36	PDE	4.878	2.57	12.535	5957	9.99844
348	NFB2681	osm-5(syb6528) X	25	fkh-8(vlc43) II	10	36	Background	4.878	0.52	2.536	1205
349	NFB2681	osm-5(syb6528) X	25	fkh-8(vlc43) II	11	37	PDE	4.987	2.131	10.628	5051	8.06967
350	NFB2681	osm-5(syb6528) X	25	fkh-8(vlc43) II	11	37	Background	4.987	0.513	2.559	1216
351	NFB2681	osm-5(syb6528) X	25	fkh-8(vlc43) II	12	38	PDE	7.11	2.098	14.917	7089	11.0207
352	NFB2681	osm-5(syb6528) X	25	fkh-8(vlc43) II	12	38	Background	7.11	0.548	3.899	1853
353	NFB2681	osm-5(syb6528) X	25	fkh-8(vlc43) II	13	39	PDE	5.833	2	11.666	5544	7.93288
354	NFB2681	osm-5(syb6528) X	25	fkh-8(vlc43) II	13	39	Background	5.833	0.64	3.733	1774
355	NFB2681	osm-5(syb6528) X	25	fkh-8(vlc43) II	14	40	PDE	4.575	2.734	12.505	5943	9.7051
356	NFB2681	osm-5(syb6528) X	25	fkh-8(vlc43) II	14	40	Background	4.575	0.612	2.801	1331
357	NFB2681	osm-5(syb6528) X	25	fkh-8(vlc43) II	15	41	PDE	5.845	2.596	15.173	7211	10.7016
358	NFB2681	osm-5(syb6528) X	25	fkh-8(vlc43) II	15	41	Background	5.845	0.765	4.469	2124
359	NFB2681	osm-5(syb6528) X	25	fkh-8(vlc43) II	16	42	PDE	4.972	2.474	12.301	5846	8.72613
360	NFB2681	osm-5(syb6528) X	25	fkh-8(vlc43) II	16	42	Background	4.972	0.719	3.575	1699
361	NFB2681	osm-5(syb6528) X	25	fkh-8(vlc43) II	17	43	PDE	4.709	2.539	11.958	5683	8.97249
362	NFB2681	osm-5(syb6528) X	25	fkh-8(vlc43) II	17	43	Background	4.709	0.634	2.986	1419
363	NFB2681	osm-5(syb6528) X	25	fkh-8(vlc43) II	18	44	PDE	6.153	2.174	13.376	6357	8.84124
364	NFB2681	osm-5(syb6528) X	25	fkh-8(vlc43) II	18	44	Background	6.153	0.737	4.537	2156
365	NFB2681	osm-5(syb6528) X	25	fkh-8(vlc43) II	19	45	PDE	4.997	2.296	11.472	5452	8.54376
366	NFB2681	osm-5(syb6528) X	25	fkh-8(vlc43) II	19	45	Background	4.997	0.586	2.927	1391
367	NFB2681	osm-5(syb6528) X	25	fkh-8(vlc43) II	20	46	PDE	5.73	2.769	15.866	7540	13.0067
368	NFB2681	osm-5(syb6528) X	25	fkh-8(vlc43) II	20	46	Background	5.73	0.499	2.858	1358
369	NFB2681	osm-5(syb6528) X	25	fkh-8(vlc43) II	21	47	PDE	5.479	2.156	11.811	5613	9.33449
370	NFB2681	osm-5(syb6528) X	25	fkh-8(vlc43) II	21	47	Background	5.479	0.452	2.477	1177
371	NFB2681	osm-5(syb6528) X	25	fkh-8(vlc43) II	22	48	PDE	5.172	2.461	12.726	6048	9.28145
372	NFB2681	osm-5(syb6528) X	25	fkh-8(vlc43) II	22	48	Background	5.172	0.666	3.447	1638
373	NFB2681	osm-5(syb6528) X	25	fkh-8(vlc43) II	23	49	PDE	5.782	1.902	10.997	5226	7.63188
374	NFB2681	osm-5(syb6528) X	25	fkh-8(vlc43) II	23	49	Background	5.782	0.582	3.367	1600
375	NFB2681	osm-5(syb6528) X	25	fkh-8(vlc43) II	24	50	PDE	6.599	2.332	15.388	7313	11.9763
376	NFB2681	osm-5(syb6528) X	25	fkh-8(vlc43) II	24	50	Background	6.599	0.517	3.409	1620
377	NFB2680	osm-5(syb6528) X	25	wild type	1	1	Phasmid 1	9.19	8.032	73.817	1253	71.8044
378	NFB2680	osm-5(syb6528) X	25	wild type	1	1	Phasmid 2	8.071	6.416	51.784	879	50.0165
379	NFB2680	osm-5(syb6528) X	25	wild type	1	1	Phasmid 3	8.012	15.824	126.779	2152	125.024
380	NFB2680	osm-5(syb6528) X	25	wild type	1	1	Phasmid 4	6.421	11.789	75.702	1285	74.2958
381	NFB2680	osm-5(syb6528) X	25	wild type	1	1	Phasmid 5	6.127	50.49	309.348	5251	308.006
382	NFB2680	osm-5(syb6528) X	25	wild type	1	1	Background	6.186	0.219	1.355	23
383	NFB2680	osm-5(syb6528) X	25	wild type	2	2	Phasmid 1	6.657	40.903	272.292	4622	270.348
384	NFB2680	osm-5(syb6528) X	25	wild type	2	2	Phasmid 2	7.541	13.648	102.92	1747	100.718
385	NFB2680	osm-5(syb6528) X	25	wild type	2	2	Phasmid 3	8.424	17.741	149.46	2537	147
386	NFB2680	osm-5(syb6528) X	25	wild type	2	2	Phasmid 4	6.893	18.701	128.9	2188	126.887
387	NFB2680	osm-5(syb6528) X	25	wild type	2	2	Phasmid 5	6.657	21.673	144.276	2449	142.332
388	NFB2680	osm-5(syb6528) X	25	wild type	2	2	Background	6.657	0.292	1.944	33
389	NFB2680	osm-5(syb6528) X	25	wild type	3	3	Phasmid 1	6.48	22.545	146.102	2480	144.631
390	NFB2680	osm-5(syb6528) X	25	wild type	3	3	Phasmid 2	6.598	16.152	106.572	1809	105.074
391	NFB2680	osm-5(syb6528) X	25	wild type	3	3	Phasmid 3	7.305	23.274	170.021	2886	168.363
392	NFB2680	osm-5(syb6528) X	25	wild type	3	3	Phasmid 4	7.718	15.626	120.593	2047	118.841
393	NFB2680	osm-5(syb6528) X	25	wild type	3	3	Phasmid 5	7.011	54.126	379.454	6441	377.863
394	NFB2680	osm-5(syb6528) X	25	wild type	3	3	Background	7.011	0.227	1.591	27
395	NFB2680	osm-5(syb6528) X	25	wild type	4	4	Phasmid 1	7.128	52.603	374.976	6365	373.443
396	NFB2680	osm-5(syb6528) X	25	wild type	4	4	Phasmid 2	8.189	12.417	101.683	1726	99.9224
397	NFB2680	osm-5(syb6528) X	25	wild type	4	4	Phasmid 3	7.776	13.235	102.92	1747	101.248
398	NFB2680	osm-5(syb6528) X	25	wild type	4	4	Phasmid 4	7.482	16.882	126.308	2144	124.699
399	NFB2680	osm-5(syb6528) X	25	wild type	4	4	Phasmid 5	7.128	19.76	140.859	2391	139.326
400	NFB2680	osm-5(syb6528) X	25	wild type	4	4	Background	7.128	0.215	1.532	26
401	NFB2680	osm-5(syb6528) X	25	wild type	5	5	Phasmid 1	8.071	11.285	91.078	1546	89.0602
402	NFB2680	osm-5(syb6528) X	25	wild type	5	5	Phasmid 2	7.246	12.163	88.133	1496	86.3215
403	NFB2680	osm-5(syb6528) X	25	wild type	5	5	Phasmid 3	7.482	10.465	78.294	1329	76.4235
404	NFB2680	osm-5(syb6528) X	25	wild type	5	5	Phasmid 4	7.423	8.238	61.151	1038	59.2953
405	NFB2680	osm-5(syb6528) X	25	wild type	5	5	Phasmid 5	7.305	37.548	274.295	4656	272.469
406	NFB2680	osm-5(syb6528) X	25	wild type	5	5	Background	7.305	0.25	1.826	31
407	NFB2680	osm-5(syb6528) X	25	wild type	6	6	Phasmid 1	7.011	5.933	41.592	706	40.5263
408	NFB2680	osm-5(syb6528) X	25	wild type	6	6	Phasmid 2	7.069	3.933	27.807	472	26.7325
409	NFB2680	osm-5(syb6528) X	25	wild type	6	6	Phasmid 3	7.659	12.808	98.089	1665	96.9248
410	NFB2680	osm-5(syb6528) X	25	wild type	6	6	Phasmid 4	8.542	8.186	69.929	1187	68.6306
411	NFB2680	osm-5(syb6528) X	25	wild type	6	6	Phasmid 5	6.598	52.036	343.341	5828	342.338
412	NFB2680	osm-5(syb6528) X	25	wild type	6	6	Background	6.598	0.152	1.002	17
413	NFB2680	osm-5(syb6528) X	25	wild type	7	7	Phasmid 1	6.127	60.087	368.143	6249	366.728
414	NFB2680	osm-5(syb6528) X	25	wild type	7	7	Phasmid 2	7.718	11.031	85.128	1445	83.3451
415	NFB2680	osm-5(syb6528) X	25	wild type	7	7	Phasmid 3	7.541	16.938	127.722	2168	125.98
416	NFB2680	osm-5(syb6528) X	25	wild type	7	7	Phasmid 4	9.721	8.818	85.717	1455	83.4714
417	NFB2680	osm-5(syb6528) X	25	wild type	7	7	Phasmid 5	7.894	19.134	151.051	2564	149.227
418	NFB2680	osm-5(syb6528) X	25	wild type	7	7	Background	7.894	0.231	1.826	31
419	NFB2680	osm-5(syb6528) X	25	wild type	8	8	Phasmid 1	6.893	11.376	78.412	1331	76.8886
420	NFB2680	osm-5(syb6528) X	25	wild type	8	8	Phasmid 2	8.601	6.795	58.441	992	56.5402
421	NFB2680	osm-5(syb6528) X	25	wild type	8	8	Phasmid 3	6.363	15.417	98.089	1665	96.6828
422	NFB2680	osm-5(syb6528) X	25	wild type	8	8	Phasmid 4	8.012	11.14	89.252	1515	87.4813
423	NFB2680	osm-5(syb6528) X	25	wild type	8	8	Phasmid 5	6.539	48.018	314.002	5330	312.557
424	NFB2680	osm-5(syb6528) X	25	wild type	8	8	Background	6.657	0.221	1.473	25
425	NFB2680	osm-5(syb6528) X	25	wild type	9	9	Phasmid 1	6.117	6.548	40.054	681	40.0528
426	NFB2680	osm-5(syb6528) X	25	wild type	9	9	Phasmid 2	5.411	5.38	29.114	495	29.1129
427	NFB2680	osm-5(syb6528) X	25	wild type	9	9	Phasmid 3	6.058	4.291	25.997	442	25.9958
428	NFB2680	osm-5(syb6528) X	25	wild type	9	9	Phasmid 4	6.823	4.793	32.702	556	32.7006
429	NFB2680	osm-5(syb6528) X	25	wild type	9	9	Phasmid 5	6.47	18.245	118.046	2007	118.045
430	NFB2680	osm-5(syb6528) X	25	wild type	9	9	Background	5.529	0.000202	1.118	19
431	NFB2680	osm-5(syb6528) X	25	wild type	10	10	Phasmid 1	9.117	22.103	201.507	3426	196.019
432	NFB2680	osm-5(syb6528) X	25	wild type	10	10	Phasmid 2	8.705	16.345	142.278	2419	137.038
433	NFB2680	osm-5(syb6528) X	25	wild type	10	10	Phasmid 3	5.058	13.628	68.934	1172	65.8891
434	NFB2680	osm-5(syb6528) X	25	wild type	10	10	Phasmid 4	6.764	10.983	74.286	1263	70.2141
435	NFB2680	osm-5(syb6528) X	25	wild type	10	10	Phasmid 5	6.058	35.65	215.976	3672	212.329
436	NFB2680	osm-5(syb6528) X	25	wild type	10	10	Background	6.058	0.602	3.647	62
437	NFB2680	osm-5(syb6528) X	25	wild type	11	11	Phasmid 1	6.176	14.086	86.99	1479	84.0008
438	NFB2680	osm-5(syb6528) X	25	wild type	11	11	Phasmid 2	8.058	10.095	81.344	1383	77.4439
439	NFB2680	osm-5(syb6528) X	25	wild type	11	11	Phasmid 3	6.117	28.779	176.039	2993	173.078
440	NFB2680	osm-5(syb6528) X	25	wild type	11	11	Phasmid 4	7.646	27.569	210.8	3584	207.099
441	NFB2680	osm-5(syb6528) X	25	wild type	11	11	Phasmid 5	8.999	16.458	148.101	2518	143.745
442	NFB2680	osm-5(syb6528) X	25	wild type	11	11	Background	8.999	0.484	4.352	74
443	NFB2680	osm-5(syb6528) X	25	wild type	12	12	Phasmid 1	5.764	58.745	338.61	5757	336.898
444	NFB2680	osm-5(syb6528) X	25	wild type	12	12	Phasmid 2	6.823	14.026	95.695	1627	93.6686
445	NFB2680	osm-5(syb6528) X	25	wild type	12	12	Phasmid 3	6.47	17.655	114.223	1942	112.301
446	NFB2680	osm-5(syb6528) X	25	wild type	12	12	Phasmid 4	8.705	6.932	60.346	1026	57.7606
447	NFB2680	osm-5(syb6528) X	25	wild type	12	12	Phasmid 5	8.528	10.448	89.108	1515	86.5752
448	NFB2680	osm-5(syb6528) X	25	wild type	12	12	Background	8.528	0.297	2.529	43
449	NFB2680	osm-5(syb6528) X	25	wild type	13	13	Phasmid 1	7.352	2.16	15.881	270	14.1533
450	NFB2680	osm-5(syb6528) X	25	wild type	13	13	Phasmid 2	6.94	2.72	18.88	321	17.2491
451	NFB2680	osm-5(syb6528) X	25	wild type	13	13	Phasmid 3	5.294	11.411	60.405	1027	59.1609
452	NFB2680	osm-5(syb6528) X	25	wild type	13	13	Phasmid 4	7.881	8.276	65.228	1109	63.376
453	NFB2680	osm-5(syb6528) X	25	wild type	13	13	Phasmid 5	7.764	10.417	80.873	1375	79.0485
454	NFB2680	osm-5(syb6528) X	25	wild type	13	13	Background	7.764	0.235	1.823	31
455	NFB2680	osm-5(syb6528) X	25	wild type	14	14	Phasmid 1	9.528	17.481	166.57	2832	164.407
456	NFB2680	osm-5(syb6528) X	25	wild type	14	14	Phasmid 2	8.823	19.38	170.981	2907	168.978
457	NFB2680	osm-5(syb6528) X	25	wild type	14	14	Phasmid 3	4.705	55.413	260.736	4433	259.668
458	NFB2680	osm-5(syb6528) X	25	wild type	14	14	Phasmid 4	6.293	10.103	63.581	1081	62.1525
459	NFB2680	osm-5(syb6528) X	25	wild type	14	14	Phasmid 5	7.529	8.453	63.64	1082	61.9309
460	NFB2680	osm-5(syb6528) X	25	wild type	14	14	Background	7.529	0.227	1.706	29
461	NFB2680	osm-5(syb6528) X	25	wild type	15	15	Phasmid 1	6.529	14.523	94.813	1612	91.0262
462	NFB2680	osm-5(syb6528) X	25	wild type	15	15	Phasmid 2	9.293	9.266	86.108	1464	80.7181
463	NFB2680	osm-5(syb6528) X	25	wild type	15	15	Phasmid 3	8.47	10.833	91.755	1560	86.8424
464	NFB2680	osm-5(syb6528) X	25	wild type	15	15	Phasmid 4	7.117	57.521	409.367	6960	405.239
465	NFB2680	osm-5(syb6528) X	25	wild type	15	15	Phasmid 5	7.705	57.557	443.48	7540	439.011
466	NFB2680	osm-5(syb6528) X	25	wild type	15	15	Background	7.705	0.58	4.47	76
467	NFB2680	osm-5(syb6528) X	25	wild type	16	16	Phasmid 1	9.705	7.467	72.463	1232	67.9405
468	NFB2680	osm-5(syb6528) X	25	wild type	16	16	Phasmid 2	7.999	9.118	72.933	1240	69.2055
469	NFB2680	osm-5(syb6528) X	25	wild type	16	16	Phasmid 3	6.588	54.134	356.608	6063	353.538
470	NFB2680	osm-5(syb6528) X	25	wild type	16	16	Phasmid 4	8.999	22.176	199.566	3393	195.372
471	NFB2680	osm-5(syb6528) X	25	wild type	16	16	Phasmid 5	10.234	15.006	153.571	2611	148.802
472	NFB2680	osm-5(syb6528) X	25	wild type	16	16	Background	10.234	0.466	4.764	81
473	NFB2680	osm-5(syb6528) X	25	wild type	17	17	Phasmid 1	8.528	7.903	67.404	1146	64.206
474	NFB2680	osm-5(syb6528) X	25	wild type	17	17	Phasmid 2	7.47	5.228	39.055	664	36.2537
475	NFB2680	osm-5(syb6528) X	25	wild type	17	17	Phasmid 3	7.705	26.664	205.448	3493	202.559
476	NFB2680	osm-5(syb6528) X	25	wild type	17	17	Phasmid 4	4.764	6.481	30.879	525	29.0925
477	NFB2680	osm-5(syb6528) X	25	wild type	17	17	Phasmid 5	5.176	4.523	23.409	398	21.468
478	NFB2680	osm-5(syb6528) X	25	wild type	17	17	Background	5.176	0.375	1.941	33
479	NFB2680	osm-5(syb6528) X	25	wild type	18	18	Phasmid 1	8.411	51.357	431.952	7344	427.881
480	NFB2680	osm-5(syb6528) X	25	wild type	18	18	Phasmid 2	6.764	18.791	127.104	2161	123.83
481	NFB2680	osm-5(syb6528) X	25	wild type	18	18	Phasmid 3	8.176	13.763	112.517	1913	108.56
482	NFB2680	osm-5(syb6528) X	25	wild type	18	18	Phasmid 4	5.588	9.758	54.523	927	51.8184
483	NFB2680	osm-5(syb6528) X	25	wild type	18	18	Phasmid 5	7.529	8.57	64.522	1097	60.878
484	NFB2680	osm-5(syb6528) X	25	wild type	18	18	Background	7.529	0.484	3.647	62
485	NFB2680	osm-5(syb6528) X	25	wild type	19	19	Phasmid 1	7.999	11.074	88.578	1506	85.7304
486	NFB2680	osm-5(syb6528) X	25	wild type	19	19	Phasmid 2	7.293	10.177	74.227	1262	71.6307
487	NFB2680	osm-5(syb6528) X	25	wild type	19	19	Phasmid 3	6.823	45.871	312.965	5321	310.536
488	NFB2680	osm-5(syb6528) X	25	wild type	19	19	Phasmid 4	5.999	10.824	64.934	1104	62.7984
489	NFB2680	osm-5(syb6528) X	25	wild type	19	19	Phasmid 5	7.94	13.519	107.341	1825	104.514
490	NFB2680	osm-5(syb6528) X	25	wild type	19	19	Background	7.94	0.356	2.823	48
491	NFB2680	osm-5(syb6528) X	25	wild type	20	20	Phasmid 1	7.352	21.336	156.865	2667	154.042
492	NFB2680	osm-5(syb6528) X	25	wild type	20	20	Phasmid 2	7.352	8.048	59.17	1006	56.3468
493	NFB2680	osm-5(syb6528) X	25	wild type	20	20	Phasmid 3	6.058	11.66	70.639	1201	68.3127
494	NFB2680	osm-5(syb6528) X	25	wild type	20	20	Phasmid 4	9.47	11.031	104.459	1776	100.823
495	NFB2680	osm-5(syb6528) X	25	wild type	20	20	Phasmid 5	8.881	17.265	153.336	2607	149.926
496	NFB2680	osm-5(syb6528) X	25	wild type	20	20	Background	8.881	0.384	3.411	58
497	NFB2681	osm-5(syb6528) X	25	fkh-8(vlc43) II	1	1	Phasmid 1	6.588	9.545	62.875	1069	62.4995
498	NFB2681	osm-5(syb6528) X	25	fkh-8(vlc43) II	1	1	Phasmid 2	5.176	3.58	18.527	315	18.232
499	NFB2681	osm-5(syb6528) X	25	fkh-8(vlc43) II	1	1	Phasmid 3	6.529	8.568	55.935	951	55.5628
500	NFB2681	osm-5(syb6528) X	25	fkh-8(vlc43) II	1	1	Phasmid 4	5.646	3.271	18.469	314	18.1472
501	NFB2681	osm-5(syb6528) X	25	fkh-8(vlc43) II	1	1	Phasmid 5	6.117	1.702	10.411	177	10.0623
502	NFB2681	osm-5(syb6528) X	25	fkh-8(vlc43) II	1	1	Background	5.176	0.057	0.294	5
503	NFB2681	osm-5(syb6528) X	25	fkh-8(vlc43) II	2	2	Phasmid 1	8.764	11.289	98.93	1682	97.966
504	NFB2681	osm-5(syb6528) X	25	fkh-8(vlc43) II	2	2	Phasmid 2	7.823	13.729	107.4	1826	106.539
505	NFB2681	osm-5(syb6528) X	25	fkh-8(vlc43) II	2	2	Phasmid 3	7.176	7.844	56.288	957	55.4986
506	NFB2681	osm-5(syb6528) X	25	fkh-8(vlc43) II	2	2	Phasmid 4	6.352	5.537	35.173	598	34.4743
507	NFB2681	osm-5(syb6528) X	25	fkh-8(vlc43) II	2	2	Phasmid 5	6.058	5.417	32.82	558	32.1536
508	NFB2681	osm-5(syb6528) X	25	fkh-8(vlc43) II	2	2	Background	4.294	0.11	0.471	8
509	NFB2681	osm-5(syb6528) X	25	fkh-8(vlc43) II	3	3	Phasmid 1	7.999	8.169	65.346	1111	64.4661
510	NFB2681	osm-5(syb6528) X	25	fkh-8(vlc43) II	3	3	Phasmid 2	7.058	5.8	40.937	696	40.1606
511	NFB2681	osm-5(syb6528) X	25	fkh-8(vlc43) II	3	3	Phasmid 3	7.823	9.962	77.933	1325	77.0725
512	NFB2681	osm-5(syb6528) X	25	fkh-8(vlc43) II	3	3	Phasmid 4	6.588	5.661	37.29	634	36.5653
513	NFB2681	osm-5(syb6528) X	25	fkh-8(vlc43) II	3	3	Phasmid 5	5.529	2.681	14.822	252	14.2138
514	NFB2681	osm-5(syb6528) X	25	fkh-8(vlc43) II	3	3	Background	4.823	0.11	0.529	9
515	NFB2681	osm-5(syb6528) X	25	fkh-8(vlc43) II	4	4	Phasmid 1	7.352	7.248	53.288	906	51.825
516	NFB2681	osm-5(syb6528) X	25	fkh-8(vlc43) II	4	4	Phasmid 2	6.764	6.217	42.054	715	40.708
517	NFB2681	osm-5(syb6528) X	25	fkh-8(vlc43) II	4	4	Phasmid 3	7.823	11.564	90.461	1538	88.9042
518	NFB2681	osm-5(syb6528) X	25	fkh-8(vlc43) II	4	4	Phasmid 4	6.646	6.717	44.642	759	43.3194
519	NFB2681	osm-5(syb6528) X	25	fkh-8(vlc43) II	4	4	Phasmid 5	4.588	1.308	5.999	102	5.08599
520	NFB2681	osm-5(syb6528) X	25	fkh-8(vlc43) II	4	4	Background	10.352	0.199	2.059	35
521	NFB2681	osm-5(syb6528) X	25	fkh-8(vlc43) II	5	5	Phasmid 1	8.352	4.697	39.231	667	38.0784
522	NFB2681	osm-5(syb6528) X	25	fkh-8(vlc43) II	5	5	Phasmid 2	9.293	4.968	46.171	785	44.8886
523	NFB2681	osm-5(syb6528) X	25	fkh-8(vlc43) II	5	5	Phasmid 3	7.47	5.937	44.348	754	43.3171
524	NFB2681	osm-5(syb6528) X	25	fkh-8(vlc43) II	5	5	Phasmid 4	8.587	3.651	31.349	533	30.164
525	NFB2681	osm-5(syb6528) X	25	fkh-8(vlc43) II	5	5	Phasmid 5	5.176	1.932	9.999	170	9.28471
526	NFB2681	osm-5(syb6528) X	25	fkh-8(vlc43) II	5	5	Background	10.234	0.138	1.412	24
527	NFB2681	osm-5(syb6528) X	25	fkh-8(vlc43) II	6	6	Phasmid 1	5.941	3.842	22.821	388	22.0368
528	NFB2681	osm-5(syb6528) X	25	fkh-8(vlc43) II	6	6	Phasmid 2	6.411	7.404	47.465	807	46.6187
529	NFB2681	osm-5(syb6528) X	25	fkh-8(vlc43) II	6	6	Phasmid 3	6.646	6.372	42.348	720	41.4707
530	NFB2681	osm-5(syb6528) X	25	fkh-8(vlc43) II	6	6	Phasmid 4	6.47	3.8	24.586	418	23.732
531	NFB2681	osm-5(syb6528) X	25	fkh-8(vlc43) II	6	6	Phasmid 5	6.646	4.761	31.644	538	30.7667
532	NFB2681	osm-5(syb6528) X	25	fkh-8(vlc43) II	6	6	Background	14.293	0.132	1.882	32
533	NFB2681	osm-5(syb6528) X	25	fkh-8(vlc43) II	7	7	Phasmid 1	7.293	10.113	73.757	1254	71.3941
534	NFB2681	osm-5(syb6528) X	25	fkh-8(vlc43) II	7	7	Phasmid 2	6.117	4.481	27.409	466	25.4271
535	NFB2681	osm-5(syb6528) X	25	fkh-8(vlc43) II	7	7	Phasmid 3	5.058	6.767	34.232	582	32.5932
536	NFB2681	osm-5(syb6528) X	25	fkh-8(vlc43) II	7	7	Phasmid 4	7.117	16.86	119.987	2040	117.681
537	NFB2681	osm-5(syb6528) X	25	fkh-8(vlc43) II	7	7	Phasmid 5	5.411	4.587	24.821	422	23.0678
538	NFB2681	osm-5(syb6528) X	25	fkh-8(vlc43) II	7	7	Background	8.528	0.324	2.764	47
539	NFB2681	osm-5(syb6528) X	25	fkh-8(vlc43) II	8	8	Phasmid 1	8.293	9.184	76.168	1295	75.1977
540	NFB2681	osm-5(syb6528) X	25	fkh-8(vlc43) II	8	8	Phasmid 2	7.94	7.096	56.347	958	55.418
541	NFB2681	osm-5(syb6528) X	25	fkh-8(vlc43) II	8	8	Phasmid 3	6.764	6.113	41.348	703	40.5566
542	NFB2681	osm-5(syb6528) X	25	fkh-8(vlc43) II	8	8	Phasmid 4	7.646	4.223	32.291	549	31.3964
543	NFB2681	osm-5(syb6528) X	25	fkh-8(vlc43) II	8	8	Phasmid 5	4.705	3.225	15.175	258	14.6245
544	NFB2681	osm-5(syb6528) X	25	fkh-8(vlc43) II	8	8	Background	7.529	0.117	0.882	15
545	NFB2681	osm-5(syb6528) X	25	fkh-8(vlc43) II	9	9	Phasmid 1	7.705	6.214	47.877	814	45.3498
546	NFB2681	osm-5(syb6528) X	25	fkh-8(vlc43) II	9	9	Phasmid 2	7.117	6.339	45.113	767	42.7786
547	NFB2681	osm-5(syb6528) X	25	fkh-8(vlc43) II	9	9	Phasmid 3	5.823	2.949	17.175	292	15.2651
548	NFB2681	osm-5(syb6528) X	25	fkh-8(vlc43) II	9	9	Phasmid 4	8.293	4.397	36.467	620	33.7469
549	NFB2681	osm-5(syb6528) X	25	fkh-8(vlc43) II	9	9	Phasmid 5	6.352	4.769	30.291	515	28.2075
550	NFB2681	osm-5(syb6528) X	25	fkh-8(vlc43) II	9	9	Background	6.823	0.328	2.235	38
551	NFB2681	osm-5(syb6528) X	25	fkh-8(vlc43) II	10	10	Phasmid 1	8.999	6.588	59.288	1008	54.5815
552	NFB2681	osm-5(syb6528) X	25	fkh-8(vlc43) II	10	10	Phasmid 2	8.234	4.964	40.878	695	36.5716
553	NFB2681	osm-5(syb6528) X	25	fkh-8(vlc43) II	10	10	Phasmid 3	7.764	10.72	83.226	1415	79.1654
554	NFB2681	osm-5(syb6528) X	25	fkh-8(vlc43) II	10	10	Phasmid 4	8.058	8.431	67.934	1155	63.7197
555	NFB2681	osm-5(syb6528) X	25	fkh-8(vlc43) II	10	10	Phasmid 5	5.294	4.311	22.821	388	20.0522
556	NFB2681	osm-5(syb6528) X	25	fkh-8(vlc43) II	10	10	Background	8.881	0.523	4.647	79
557	NFB2681	osm-5(syb6528) X	25	fkh-8(vlc43) II	11	11	Phasmid 1	8.587	12.781	109.753	1866	108.774
558	NFB2681	osm-5(syb6528) X	25	fkh-8(vlc43) II	11	11	Phasmid 2	7.411	7.738	57.347	975	56.5021
559	NFB2681	osm-5(syb6528) X	25	fkh-8(vlc43) II	11	11	Phasmid 3	6.588	7.402	48.759	829	48.008
560	NFB2681	osm-5(syb6528) X	25	fkh-8(vlc43) II	11	11	Phasmid 4	7.587	5.14	38.996	663	38.1311
561	NFB2681	osm-5(syb6528) X	25	fkh-8(vlc43) II	11	11	Phasmid 5	7.176	2.475	17.763	302	16.9449
562	NFB2681	osm-5(syb6528) X	25	fkh-8(vlc43) II	11	11	Background	8.234	0.114	0.941	16
563	NFB2681	osm-5(syb6528) X	25	fkh-8(vlc43) II	12	12	Phasmid 1	5.176	5.75	29.761	506	27.8355
564	NFB2681	osm-5(syb6528) X	25	fkh-8(vlc43) II	12	12	Phasmid 2	6.94	8.246	57.229	973	54.6473
565	NFB2681	osm-5(syb6528) X	25	fkh-8(vlc43) II	12	12	Phasmid 3	7.587	13.558	102.871	1749	100.049
566	NFB2681	osm-5(syb6528) X	25	fkh-8(vlc43) II	12	12	Phasmid 4	7.764	7.061	54.817	932	51.9288
567	NFB2681	osm-5(syb6528) X	25	fkh-8(vlc43) II	12	12	Phasmid 5	8.881	7.338	65.169	1108	61.8653
568	NFB2681	osm-5(syb6528) X	25	fkh-8(vlc43) II	12	12	Background	7.117	0.372	2.647	45
569	NFB2681	osm-5(syb6528) X	25	fkh-8(vlc43) II	13	13	Phasmid 1	7.823	5.105	39.937	679	38.3568
570	NFB2681	osm-5(syb6528) X	25	fkh-8(vlc43) II	13	13	Phasmid 2	6.117	4.962	30.35	516	29.1144
571	NFB2681	osm-5(syb6528) X	25	fkh-8(vlc43) II	13	13	Phasmid 3	4.117	2.286	9.411	160	8.57937
572	NFB2681	osm-5(syb6528) X	25	fkh-8(vlc43) II	13	13	Phasmid 4	5.882	8.53	50.171	853	48.9828
573	NFB2681	osm-5(syb6528) X	25	fkh-8(vlc43) II	13	13	Phasmid 5	6.293	9.084	57.17	972	55.8988
574	NFB2681	osm-5(syb6528) X	25	fkh-8(vlc43) II	13	13	Background	5.235	0.202	1.059	18
575	NFB2681	osm-5(syb6528) X	25	fkh-8(vlc43) II	14	14	Phasmid 1	7.176	11.779	84.52	1437	83.2355
576	NFB2681	osm-5(syb6528) X	25	fkh-8(vlc43) II	14	14	Phasmid 2	7.234	9.854	71.286	1212	69.9911
577	NFB2681	osm-5(syb6528) X	25	fkh-8(vlc43) II	14	14	Phasmid 3	7.764	14.803	114.928	1954	113.538
578	NFB2681	osm-5(syb6528) X	25	fkh-8(vlc43) II	14	14	Phasmid 4	6.823	9.388	64.052	1089	62.8307
579	NFB2681	osm-5(syb6528) X	25	fkh-8(vlc43) II	14	14	Phasmid 5	4	5.397	21.586	367	20.87
580	NFB2681	osm-5(syb6528) X	25	fkh-8(vlc43) II	14	14	Background	6.235	0.179	1.118	19
581	NFB2681	osm-5(syb6528) X	25	fkh-8(vlc43) II	15	15	Phasmid 1	6.352	6.426	40.819	694	39.2501
582	NFB2681	osm-5(syb6528) X	25	fkh-8(vlc43) II	15	15	Phasmid 2	6.411	6.33	40.584	690	39.0005
583	NFB2681	osm-5(syb6528) X	25	fkh-8(vlc43) II	15	15	Phasmid 3	6.646	4.566	30.35	516	28.7084
584	NFB2681	osm-5(syb6528) X	25	fkh-8(vlc43) II	15	15	Phasmid 4	7.352	4.456	32.761	557	30.9451
585	NFB2681	osm-5(syb6528) X	25	fkh-8(vlc43) II	15	15	Phasmid 5	4.647	2.785	12.94	220	11.7922
586	NFB2681	osm-5(syb6528) X	25	fkh-8(vlc43) II	15	15	Background	5.47	0.247	1.353	23
587	NFB2681	osm-5(syb6528) X	25	fkh-8(vlc43) II	16	16	Phasmid 1	6.352	14.185	90.108	1532	87.6307
588	NFB2681	osm-5(syb6528) X	25	fkh-8(vlc43) II	16	16	Phasmid 2	8.234	13.593	111.929	1903	108.718
589	NFB2681	osm-5(syb6528) X	25	fkh-8(vlc43) II	16	16	Phasmid 3	7.47	4.394	32.82	558	29.9067
590	NFB2681	osm-5(syb6528) X	25	fkh-8(vlc43) II	16	16	Phasmid 4	8.764	3.289	28.82	490	25.402
591	NFB2681	osm-5(syb6528) X	25	fkh-8(vlc43) II	16	16	Phasmid 5	5.47	2.108	11.528	196	9.3947
592	NFB2681	osm-5(syb6528) X	25	fkh-8(vlc43) II	16	16	Background	4.823	0.39	1.882	32
593	NFB2681	osm-5(syb6528) X	25	fkh-8(vlc43) II	17	17	Phasmid 1	8.999	9.196	82.756	1407	81.1182
594	NFB2681	osm-5(syb6528) X	25	fkh-8(vlc43) II	17	17	Phasmid 2	10.411	5.853	60.934	1036	59.0392
595	NFB2681	osm-5(syb6528) X	25	fkh-8(vlc43) II	17	17	Phasmid 3	7.646	7.377	56.406	959	55.0144
596	NFB2681	osm-5(syb6528) X	25	fkh-8(vlc43) II	17	17	Phasmid 4	6.411	5.183	33.232	565	32.0652
597	NFB2681	osm-5(syb6528) X	25	fkh-8(vlc43) II	17	17	Phasmid 5	3.529	2.55	8.999	153	8.35672
598	NFB2681	osm-5(syb6528) X	25	fkh-8(vlc43) II	17	17	Background	5.176	0.182	0.941	16
599	NFB2681	osm-5(syb6528) X	25	fkh-8(vlc43) II	18	18	Phasmid 1	8.234	9.4	77.403	1316	76.3655
600	NFB2681	osm-5(syb6528) X	25	fkh-8(vlc43) II	18	18	Phasmid 2	8.234	5.829	47.995	816	46.9575
601	NFB2681	osm-5(syb6528) X	25	fkh-8(vlc43) II	18	18	Phasmid 3	8.47	8.66	73.345	1247	72.2778
602	NFB2681	osm-5(syb6528) X	25	fkh-8(vlc43) II	18	18	Phasmid 4	7.293	7.774	56.7	964	55.7811
603	NFB2681	osm-5(syb6528) X	25	fkh-8(vlc43) II	18	18	Phasmid 5	4.352	3.784	16.469	280	15.9206
604	NFB2681	osm-5(syb6528) X	25	fkh-8(vlc43) II	18	18	Background	5.117	0.126	0.647	11
605	NFB2681	osm-5(syb6528) X	25	fkh-8(vlc43) II	19	19	Phasmid 1	7.529	8.719	65.64	1116	64.8871
606	NFB2681	osm-5(syb6528) X	25	fkh-8(vlc43) II	19	19	Phasmid 2	7.117	6.529	46.465	790	45.7533
607	NFB2681	osm-5(syb6528) X	25	fkh-8(vlc43) II	19	19	Phasmid 3	6.117	8.904	54.465	926	53.8533
608	NFB2681	osm-5(syb6528) X	25	fkh-8(vlc43) II	19	19	Phasmid 4	6.764	5.93	40.113	682	39.4366
609	NFB2681	osm-5(syb6528) X	25	fkh-8(vlc43) II	19	19	Phasmid 5	5.176	3.705	19.174	326	18.6564
610	NFB2681	osm-5(syb6528) X	25	fkh-8(vlc43) II	19	19	Background	5.294	0.1	0.529	9
611	NFB2681	osm-5(syb6528) X	25	fkh-8(vlc43) II	20	20	Phasmid 1	7.881	4.097	32.291	549	31.0537
612	NFB2681	osm-5(syb6528) X	25	fkh-8(vlc43) II	20	20	Phasmid 2	7.764	4.182	32.467	552	31.2481
613	NFB2681	osm-5(syb6528) X	25	fkh-8(vlc43) II	20	20	Phasmid 3	8.352	10.12	84.52	1437	83.2087
614	NFB2681	osm-5(syb6528) X	25	fkh-8(vlc43) II	20	20	Phasmid 4	7.999	14.044	112.341	1910	111.085
615	NFB2681	osm-5(syb6528) X	25	fkh-8(vlc43) II	20	20	Phasmid 5	7.176	3.361	24.115	410	22.9884
616	NFB2681	osm-5(syb6528) X	25	fkh-8(vlc43) II	20	20	Background	10.117	0.157	1.588	27

## Sheet: F3 D pval
F test
Background 1	Background 2	CEPV	CEPD	ADE	PDE	Phasmids
wild type	fkh-8(vlc43)	2.91142e-06	6.46368e-14	2.73562e-19	2.41567e-25	1.0106e-31
t test
Background 1	Background 2	CEPV	CEPD	ADE	PDE	Phasmids
wild type	fkh-8(vlc43)	4.40542e-06	1.7865e-06	3.54365e-07	5.10127e-09	5.78297e-13

## Sheet: F3 FS1B,C
Gene	Reporter	Rep. Lenght	Background	Temp. (º)	N	Worm	Stage	Labial Region	Amphid Region	Anterior Deirid Region	Posterior Deirid Region	Phasmid Region	Neurons
ift-20	otIs395	171	fkh-8(tm292)	25	10	1	Young Adult	17	23	0	1	5	46
ift-20	otIs395	171	fkh-8(tm292)	25	10	2	Young Adult	22	24	2	2	5	55
ift-20	otIs395	171	fkh-8(tm292)	25	10	3	Young Adult	21	24	2	0	4	51
ift-20	otIs395	171	fkh-8(tm292)	25	10	4	Young Adult	23	24	1	0	4	52
ift-20	otIs395	171	fkh-8(tm292)	25	10	5	Young Adult	17	23	1	1	4	46
ift-20	otIs395	171	fkh-8(tm292)	25	10	6	Young Adult	22	24	1	0	4	51
ift-20	otIs395	171	fkh-8(tm292)	25	10	7	Young Adult	18	24	1	0	4	47
ift-20	otIs395	171	fkh-8(tm292)	25	10	8	Young Adult	18	24	0	0	4	46
ift-20	otIs395	171	fkh-8(tm292)	25	10	9	Young Adult	17	24	0	0	4	45
ift-20	otIs395	171	fkh-8(tm292)	25	10	10	Young Adult	18	24	1	1	4	48
ift-20	otIs395	171	fkh-8(tm292)	25	10	ALL	Mean	19.3	23.8	0.9	0.5	4.2	48.7
ift-20	otIs395	171	fkh-8(tm292)	25	10	ALL	SD	2.40601	0.421637	0.737865	0.707107	0.421637	3.335
ift-20	otIs395	171	wild type	25	10	1	Young Adult	22	23	4	2	5	56
ift-20	otIs395	171	wild type	25	10	2	Young Adult	20	23	2	2	5	52
ift-20	otIs395	171	wild type	25	10	3	Young Adult	22	23	1	2	5	53
ift-20	otIs395	171	wild type	25	10	4	Young Adult	23	24	3	2	5	57
ift-20	otIs395	171	wild type	25	10	5	Young Adult	23	23	3	2	4	55
ift-20	otIs395	171	wild type	25	10	6	Young Adult	24	24	3	2	5	58
ift-20	otIs395	171	wild type	25	10	7	Young Adult	24	24	3	2	5	58
ift-20	otIs395	171	wild type	25	10	8	Young Adult	24	24	1	2	5	56
ift-20	otIs395	171	wild type	25	10	9	Young Adult	22	23	2	2	5	54
ift-20	otIs395	171	wild type	25	10	10	Young Adult	24	24	5	2	5	60
ift-20	otIs395	171	wild type	25	10	ALL	Mean	22.8	23.5	2.7	2	4.9	55.9
ift-20	otIs395	171	wild type	25	10	ALL	SD	1.31656	0.527046	1.25167	0	0.316228	2.46982
ift-20	otIs395	171	fkh-8(vlc43)	25	12	1	Young Adult	18	24	1	0	4	47
ift-20	otIs395	171	fkh-8(vlc43)	25	12	2	Young Adult	18	23	0	0	4	45
ift-20	otIs395	171	fkh-8(vlc43)	25	12	3	Young Adult	16	22	0	0	4	42
ift-20	otIs395	171	fkh-8(vlc43)	25	12	4	Young Adult	14	24	1	0	4	43
ift-20	otIs395	171	fkh-8(vlc43)	25	12	5	Young Adult	16	23	0	0	4	43
ift-20	otIs395	171	fkh-8(vlc43)	25	12	6	Young Adult	18	24	1	0	5	48
ift-20	otIs395	171	fkh-8(vlc43)	25	12	7	Young Adult	18	23	0	0	4	45
ift-20	otIs395	171	fkh-8(vlc43)	25	12	8	Young Adult	18	23	0	0	4	45
ift-20	otIs395	171	fkh-8(vlc43)	25	12	9	Young Adult	18	23	0	0	4	45
ift-20	otIs395	171	fkh-8(vlc43)	25	12	10	Young Adult	18	24	0	0	4	46
ift-20	otIs395	171	fkh-8(vlc43)	25	12	11	Young Adult	18	24	1	0	4	47
ift-20	otIs395	171	fkh-8(vlc43)	25	12	12	Young Adult	18	24	0	0	5	47
ift-20	otIs395	171	fkh-8(vlc43)	25	12	ALL	Mean	17.3333	23.4167	0.333333	0	4.16667	45.25
ift-20	otIs395	171	fkh-8(vlc43)	25	12	ALL	SD	1.30268	0.668558	0.492366	0	0.389249	1.86474
ift-20	otIs395	171	wt/wt	25	10	1	Young Adult	19	23	1	2	5	50
ift-20	otIs395	171	wt/wt	25	10	2	Young Adult	23	24	2	2	5	56
ift-20	otIs395	171	wt/wt	25	10	3	Young Adult	22	23	3	1	5	54
ift-20	otIs395	171	wt/wt	25	10	4	Young Adult	21	24	2	2	5	54
ift-20	otIs395	171	wt/wt	25	10	5	Young Adult	22	24	2	2	5	55
ift-20	otIs395	171	wt/wt	25	10	6	Young Adult	20	22	2	2	5	51
ift-20	otIs395	171	wt/wt	25	10	7	Young Adult	20	23	3	2	5	53
ift-20	otIs395	171	wt/wt	25	10	8	Young Adult	23	23	3	2	4	55
ift-20	otIs395	171	wt/wt	25	10	9	Young Adult	23	24	3	2	5	57
ift-20	otIs395	171	wt/wt	25	10	10	Young Adult	23	24	3	1	5	56
ift-20	otIs395	171	wt/wt	25	10	ALL	Mean	21.6	23.4	2.4	1.8	4.9	54.1
ift-20	otIs395	171	wt/wt	25	10	ALL	SD	1.50555	0.699206	0.699206	0.421637	0.316228	2.23358
ift-20	otIs395	171	wt/vlc43	25	10	1	Young Adult	22	24	1	2	5	54
ift-20	otIs395	171	wt/vlc43	25	10	2	Young Adult	23	24	2	1	4	54
ift-20	otIs395	171	wt/vlc43	25	10	3	Young Adult	23	23	1	2	5	54
ift-20	otIs395	171	wt/vlc43	25	10	4	Young Adult	22	23	3	2	5	55
ift-20	otIs395	171	wt/vlc43	25	10	5	Young Adult	21	23	2	2	5	53
ift-20	otIs395	171	wt/vlc43	25	10	6	Young Adult	24	24	2	2	5	57
ift-20	otIs395	171	wt/vlc43	25	10	7	Young Adult	21	23	2	2	4	52
ift-20	otIs395	171	wt/vlc43	25	10	8	Young Adult	20	24	3	1	5	53
ift-20	otIs395	171	wt/vlc43	25	10	9	Young Adult	20	22	3	2	5	52
ift-20	otIs395	171	wt/vlc43	25	10	10	Young Adult	21	22	3	2	5	53
ift-20	otIs395	171	wt/vlc43	25	10	ALL	Mean	21.7	23.2	2.2	1.8	4.8	53.7
ift-20	otIs395	171	wt/vlc43	25	10	ALL	SD	1.33749	0.788811	0.788811	0.421637	0.421637	1.49443
ift-20	otIs395	171	wt/tm292	25	10	1	Young Adult	21	24	3	1	5	54
ift-20	otIs395	171	wt/tm292	25	10	2	Young Adult	22	24	2	2	4	54
ift-20	otIs395	171	wt/tm292	25	10	3	Young Adult	21	23	3	2	5	54
ift-20	otIs395	171	wt/tm292	25	10	4	Young Adult	23	24	3	1	5	56
ift-20	otIs395	171	wt/tm292	25	10	5	Young Adult	22	24	2	1	4	53
ift-20	otIs395	171	wt/tm292	25	10	6	Young Adult	23	24	2	1	5	55
ift-20	otIs395	171	wt/tm292	25	10	7	Young Adult	21	24	3	1	4	53
ift-20	otIs395	171	wt/tm292	25	10	8	Young Adult	23	23	3	2	5	56
ift-20	otIs395	171	wt/tm292	25	10	9	Young Adult	20	24	3	0	5	52
ift-20	otIs395	171	wt/tm292	25	10	10	Young Adult	21	23	3	2	4	53
ift-20	otIs395	171	wt/tm292	25	10	ALL	Mean	21.7	23.7	2.7	1.3	4.6	54
ift-20	otIs395	171	wt/tm292	25	10	ALL	SD	1.05935	0.483046	0.483046	0.674949	0.516398	1.33333

## Sheet: F3 FS1B,C pval
A) Homozygous
Background 1	Background 2	F test	t test
wild type	fkh-8(tm292)	0.384255	3.28055e-05
wild type	fkh-8(vlc43)	0.375469	2.7648e-10
fkh-8(tm292)	fkh-8(vlc43)	0.0731715	0.00613075
B) Heterozygous
Background 1	Background 2	F test	t test
wild type/wild type	wild type/fkh-8(tm292)	0.140256	0.904589
wild type/wild type	wild type/fkh-8(vlc43)	0.246935	0.643524
wild type/fkh-8(tm292)	wild type/fkh-8(vlc43)	0.739518	0.64142

## Sheet: F3 FS2
Gene	Reporter	Rep. Lenght	Background	FKH site	Temp. (º)	N	Worm	Stage	Labial Region	Amphid Region	Anterior Deirid Region	Posterior Deirid Region	Phasmid Region	Neurons
ift-20	vlcEx1262	135	wild type	wild type	25	10	1	Young Adult	17	21	2	0	4	44
ift-20	vlcEx1262	135	wild type	wild type	25	10	2	Young Adult	16	17	1	0	5	39
ift-20	vlcEx1262	135	wild type	wild type	25	10	3	Young Adult	20	17	2	1	3	43
ift-20	vlcEx1262	135	wild type	wild type	25	10	4	Young Adult	17	13	2	1	4	37
ift-20	vlcEx1262	135	wild type	wild type	25	10	5	Young Adult	16	16	2	2	5	41
ift-20	vlcEx1262	135	wild type	wild type	25	10	6	Young Adult	21	17	3	2	4	47
ift-20	vlcEx1262	135	wild type	wild type	25	10	7	Young Adult	19	19	2	2	5	47
ift-20	vlcEx1262	135	wild type	wild type	25	10	8	Young Adult	15	17	3	0	5	40
ift-20	vlcEx1262	135	wild type	wild type	25	10	9	Young Adult	16	17	3	2	4	42
ift-20	vlcEx1262	135	wild type	wild type	25	10	10	Young Adult	16	19	3	2	3	43
ift-20	vlcEx1262	135	wild type	wild type	25	10	MEAN	Young Adult	17.3	17.3	2.3	1.2	4.2	42.3
ift-20	vlcEx1262	135	wild type	wild type	25	10	DESVEST	Young Adult	2.00278	2.11082	0.674949	0.918937	0.788811	3.23351
ift-20	vlcEx1263	135	wild type	wild type	25	10	1	Young Adult	19	20	2	2	5	48
ift-20	vlcEx1263	135	wild type	wild type	25	10	2	Young Adult	17	20	3	1	5	46
ift-20	vlcEx1263	135	wild type	wild type	25	10	3	Young Adult	16	18	2	0	5	41
ift-20	vlcEx1263	135	wild type	wild type	25	10	4	Young Adult	15	14	3	2	3	37
ift-20	vlcEx1263	135	wild type	wild type	25	10	5	Young Adult	14	13	3	2	4	36
ift-20	vlcEx1263	135	wild type	wild type	25	10	6	Young Adult	16	19	3	1	4	43
ift-20	vlcEx1263	135	wild type	wild type	25	10	7	Young Adult	18	19	3	1	4	45
ift-20	vlcEx1263	135	wild type	wild type	25	10	8	Young Adult	16	19	4	2	5	46
ift-20	vlcEx1263	135	wild type	wild type	25	10	9	Young Adult	20	21	3	2	4	50
ift-20	vlcEx1263	135	wild type	wild type	25	10	10	Young Adult	19	19	4	1	4	47
ift-20	vlcEx1263	135	wild type	wild type	25	10	MEAN	Young Adult	17	18.2	3	1.4	4.3	43.9
ift-20	vlcEx1263	135	wild type	wild type	25	10	DESVEST	Young Adult	1.94365	2.61619	0.666667	0.699206	0.674949	4.62961
ift-20	vlcEx1285	135	wild type	wild type	25	10	1	Young Adult	22	20	1	1	4	48
ift-20	vlcEx1285	135	wild type	wild type	25	10	2	Young Adult	20	21	1	0	5	47
ift-20	vlcEx1285	135	wild type	wild type	25	10	3	Young Adult	20	24	3	1	5	53
ift-20	vlcEx1285	135	wild type	wild type	25	10	4	Young Adult	17	21	4	2	5	49
ift-20	vlcEx1285	135	wild type	wild type	25	10	5	Young Adult	15	19	2	2	5	43
ift-20	vlcEx1285	135	wild type	wild type	25	10	6	Young Adult	17	16	3	2	5	43
ift-20	vlcEx1285	135	wild type	wild type	25	10	7	Young Adult	23	20	3	2	4	52
ift-20	vlcEx1285	135	wild type	wild type	25	10	8	Young Adult	22	17	3	1	4	47
ift-20	vlcEx1285	135	wild type	wild type	25	10	9	Young Adult	19	17	3	3	5	47
ift-20	vlcEx1285	135	wild type	wild type	25	10	10	Young Adult	19	20	3	1	4	47
ift-20	vlcEx1285	135	wild type	wild type	25	10	MEAN	Young Adult	19.4	19.5	2.6	1.5	4.6	47.6
ift-20	vlcEx1285	135	wild type	wild type	25	10	DESVEST	Young Adult	2.54733	2.36878	0.966092	0.849837	0.516398	3.23866
ift-20	vlcEx1280	135	wild type	mutated	25	10	1	Young Adult	8	11	0	0	3	22
ift-20	vlcEx1280	135	wild type	mutated	25	10	2	Young Adult	6	8	0	0	4	18
ift-20	vlcEx1280	135	wild type	mutated	25	10	3	Young Adult	2	12	0	0	4	18
ift-20	vlcEx1280	135	wild type	mutated	25	10	4	Young Adult	9	9	0	0	4	22
ift-20	vlcEx1280	135	wild type	mutated	25	10	5	Young Adult	2	11	0	0	4	17
ift-20	vlcEx1280	135	wild type	mutated	25	10	6	Young Adult	0	10	0	0	4	14
ift-20	vlcEx1280	135	wild type	mutated	25	10	7	Young Adult	10	10	0	0	3	23
ift-20	vlcEx1280	135	wild type	mutated	25	10	8	Young Adult	1	15	0	0	4	20
ift-20	vlcEx1280	135	wild type	mutated	25	10	9	Young Adult	0	11	0	0	2	13
ift-20	vlcEx1280	135	wild type	mutated	25	10	10	Young Adult	13	14	0	0	4	31
ift-20	vlcEx1280	135	wild type	mutated	25	10	MEAN	Young Adult	5.1	11.1	0	0	3.6	19.8
ift-20	vlcEx1280	135	wild type	mutated	25	10	DESVEST	Young Adult	4.70106	2.13177	0	0	0.699206	5.15967
ift-20	vlcEx1281	135	wild type	mutated	25	10	1	Young Adult	14	16	0	0	4	34
ift-20	vlcEx1281	135	wild type	mutated	25	10	2	Young Adult	11	15	0	1	4	31
ift-20	vlcEx1281	135	wild type	mutated	25	10	3	Young Adult	16	13	1	0	4	34
ift-20	vlcEx1281	135	wild type	mutated	25	10	4	Young Adult	16	18	1	0	3	38
ift-20	vlcEx1281	135	wild type	mutated	25	10	5	Young Adult	9	7	0	0	3	19
ift-20	vlcEx1281	135	wild type	mutated	25	10	6	Young Adult	9	11	0	0	4	24
ift-20	vlcEx1281	135	wild type	mutated	25	10	7	Young Adult	11	15	1	0	3	30
ift-20	vlcEx1281	135	wild type	mutated	25	10	8	Young Adult	13	12	0	0	4	29
ift-20	vlcEx1281	135	wild type	mutated	25	10	9	Young Adult	13	18	0	0	4	35
ift-20	vlcEx1281	135	wild type	mutated	25	10	10	Young Adult	9	12	0	0	4	25
ift-20	vlcEx1281	135	wild type	mutated	25	10	MEAN	Young Adult	12.1	13.7	0.3	0.1	3.7	29.9
ift-20	vlcEx1281	135	wild type	mutated	25	10	DESVEST	Young Adult	2.72641	3.40098	0.483046	0.316228	0.483046	5.82046
ift-20	vlcEx1282	135	wild type	mutated	25	10	1	Young Adult	13	14	0	0	4	31
ift-20	vlcEx1282	135	wild type	mutated	25	10	2	Young Adult	10	14	0	0	4	28
ift-20	vlcEx1282	135	wild type	mutated	25	10	3	Young Adult	10	12	0	0	4	26
ift-20	vlcEx1282	135	wild type	mutated	25	10	4	Young Adult	12	10	0	0	4	26
ift-20	vlcEx1282	135	wild type	mutated	25	10	5	Young Adult	7	10	0	0	4	21
ift-20	vlcEx1282	135	wild type	mutated	25	10	6	Young Adult	10	10	0	1	4	25
ift-20	vlcEx1282	135	wild type	mutated	25	10	7	Young Adult	12	14	0	0	4	30
ift-20	vlcEx1282	135	wild type	mutated	25	10	8	Young Adult	13	15	1	0	4	33
ift-20	vlcEx1282	135	wild type	mutated	25	10	9	Young Adult	12	15	1	0	4	32
ift-20	vlcEx1282	135	wild type	mutated	25	10	10	Young Adult	7	15	0	0	3	25
ift-20	vlcEx1282	135	wild type	mutated	25	10	MEAN	Young Adult	10.6	12.9	0.2	0.1	3.9	27.7
ift-20	vlcEx1282	135	wild type	mutated	25	10	DESVEST	Young Adult	2.22111	2.18327	0.421637	0.316228	0.316228	3.77271
xbx-1	vclEx1137	105	wild type	wild type	25	10	1	Young Adult	19	17	3	2	5	46
xbx-1	vclEx1137	105	wild type	wild type	25	10	2	Young Adult	17	16	2	2	5	42
xbx-1	vclEx1137	105	wild type	wild type	25	10	3	Young Adult	20	21	3	2	5	51
xbx-1	vclEx1137	105	wild type	wild type	25	10	4	Young Adult	20	22	3	1	3	49
xbx-1	vclEx1137	105	wild type	wild type	25	10	5	Young Adult	21	17	2	1	5	46
xbx-1	vclEx1137	105	wild type	wild type	25	10	6	Young Adult	19	21	3	1	4	48
xbx-1	vclEx1137	105	wild type	wild type	25	10	7	Young Adult	20	21	3	1	4	49
xbx-1	vclEx1137	105	wild type	wild type	25	10	8	Young Adult	20	15	3	2	3	43
xbx-1	vclEx1137	105	wild type	wild type	25	10	9	Young Adult	19	19	2	1	5	46
xbx-1	vclEx1137	105	wild type	wild type	25	10	10	Young Adult	21	15	1	1	5	43
xbx-1	vclEx1137	105	wild type	wild type	25	10	MEAN	Young Adult	19.6	18.4	2.5	1.4	4.4	46.3
xbx-1	vclEx1137	105	wild type	wild type	25	10	DESVEST	Young Adult	1.17379	2.71621	0.707107	0.516398	0.843274	2.98329
xbx-1	vclEx1138	105	wild type	wild type	25	10	1	Young Adult	21	19	3	1	4	48
xbx-1	vclEx1138	105	wild type	wild type	25	10	2	Young Adult	22	20	1	2	5	50
xbx-1	vclEx1138	105	wild type	wild type	25	10	3	Young Adult	21	21	3	2	5	52
xbx-1	vclEx1138	105	wild type	wild type	25	10	4	Young Adult	20	18	3	2	5	48
xbx-1	vclEx1138	105	wild type	wild type	25	10	5	Young Adult	21	19	3	1	5	49
xbx-1	vclEx1138	105	wild type	wild type	25	10	6	Young Adult	21	18	1	1	5	46
xbx-1	vclEx1138	105	wild type	wild type	25	10	7	Young Adult	18	21	2	2	5	48
xbx-1	vclEx1138	105	wild type	wild type	25	10	8	Young Adult	22	18	3	1	4	48
xbx-1	vclEx1138	105	wild type	wild type	25	10	9	Young Adult	17	17	2	1	3	40
xbx-1	vclEx1138	105	wild type	wild type	25	10	10	Young Adult	16	19	3	2	5	45
xbx-1	vclEx1138	105	wild type	wild type	25	10	MEAN	Young Adult	19.9	19	2.4	1.5	4.6	47.4
xbx-1	vclEx1138	105	wild type	wild type	25	10	DESVEST	Young Adult	2.13177	1.33333	0.843274	0.527046	0.699206	3.23866
xbx-1	vclEx1139	105	wild type	wild type	25	10	1	Young Adult	16	16	1	2	5	40
xbx-1	vclEx1139	105	wild type	wild type	25	10	2	Young Adult	20	16	2	2	5	45
xbx-1	vclEx1139	105	wild type	wild type	25	10	3	Young Adult	21	13	3	1	4	42
xbx-1	vclEx1139	105	wild type	wild type	25	10	4	Young Adult	19	14	2	2	4	41
xbx-1	vclEx1139	105	wild type	wild type	25	10	5	Young Adult	19	12	1	2	4	38
xbx-1	vclEx1139	105	wild type	wild type	25	10	6	Young Adult	17	11	2	0	4	34
xbx-1	vclEx1139	105	wild type	wild type	25	10	7	Young Adult	19	15	1	1	5	41
xbx-1	vclEx1139	105	wild type	wild type	25	10	8	Young Adult	18	13	0	2	3	36
xbx-1	vclEx1139	105	wild type	wild type	25	10	9	Young Adult	20	16	1	1	4	42
xbx-1	vclEx1139	105	wild type	wild type	25	10	10	Young Adult	18	14	1	1	3	37
xbx-1	vclEx1139	105	wild type	wild type	25	10	MEAN	Young Adult	18.7	14	1.4	1.4	4.1	39.6
xbx-1	vclEx1139	105	wild type	wild type	25	10	DESVEST	Young Adult	1.49443	1.76383	0.843274	0.699206	0.737865	3.30656
xbx-1	vclEx1140	105	wild type	mutated	25	10	1	Young Adult	9	9	0	1	4	23
xbx-1	vclEx1140	105	wild type	mutated	25	10	2	Young Adult	14	15	1	1	4	35
xbx-1	vclEx1140	105	wild type	mutated	25	10	3	Young Adult	10	8	1	0	3	22
xbx-1	vclEx1140	105	wild type	mutated	25	10	4	Young Adult	10	6	0	0	5	21
xbx-1	vclEx1140	105	wild type	mutated	25	10	5	Young Adult	18	6	0	0	4	28
xbx-1	vclEx1140	105	wild type	mutated	25	10	6	Young Adult	10	10	0	0	5	25
xbx-1	vclEx1140	105	wild type	mutated	25	10	7	Young Adult	7	4	0	0	3	14
xbx-1	vclEx1140	105	wild type	mutated	25	10	8	Young Adult	12	3	0	0	5	20
xbx-1	vclEx1140	105	wild type	mutated	25	10	9	Young Adult	5	6	0	0	2	13
xbx-1	vclEx1140	105	wild type	mutated	25	10	10	Young Adult	8	5	0	0	3	16
xbx-1	vclEx1140	105	wild type	mutated	25	10	MEAN	Young Adult	10.3	7.2	0.2	0.2	3.8	21.7
xbx-1	vclEx1140	105	wild type	mutated	25	10	DESVEST	Young Adult	3.6833	3.48967	0.421637	0.421637	1.0328	6.6675
xbx-1	vclEx1141	105	wild type	mutated	25	10	1	Young Adult	19	5	1	1	4	30
xbx-1	vclEx1141	105	wild type	mutated	25	10	2	Young Adult	9	3	1	0	5	18
xbx-1	vclEx1141	105	wild type	mutated	25	10	3	Young Adult	3	2	0	0	5	10
xbx-1	vclEx1141	105	wild type	mutated	25	10	4	Young Adult	9	2	0	0	4	15
xbx-1	vclEx1141	105	wild type	mutated	25	10	5	Young Adult	16	7	1	0	4	28
xbx-1	vclEx1141	105	wild type	mutated	25	10	6	Young Adult	19	10	1	1	3	34
xbx-1	vclEx1141	105	wild type	mutated	25	10	7	Young Adult	14	2	2	1	1	20
xbx-1	vclEx1141	105	wild type	mutated	25	10	8	Young Adult	10	10	2	0	5	27
xbx-1	vclEx1141	105	wild type	mutated	25	10	9	Young Adult	14	7	1	0	4	26
xbx-1	vclEx1141	105	wild type	mutated	25	10	10	Young Adult	10	6	0	0	3	19
xbx-1	vclEx1141	105	wild type	mutated	25	10	MEAN	Young Adult	12.3	5.4	0.9	0.3	3.8	22.7
xbx-1	vclEx1141	105	wild type	mutated	25	10	DESVEST	Young Adult	5.03433	3.13404	0.737865	0.483046	1.22927	7.4692
xbx-1	vclEx1142	105	wild type	mutated	25	10	1	Young Adult	9	12	0	0	5	26
xbx-1	vclEx1142	105	wild type	mutated	25	10	2	Young Adult	10	9	0	0	5	24
xbx-1	vclEx1142	105	wild type	mutated	25	10	3	Young Adult	6	10	0	1	5	22
xbx-1	vclEx1142	105	wild type	mutated	25	10	4	Young Adult	9	7	0	1	5	22
xbx-1	vclEx1142	105	wild type	mutated	25	10	5	Young Adult	7	11	1	0	4	23
xbx-1	vclEx1142	105	wild type	mutated	25	10	6	Young Adult	4	4	0	0	4	12
xbx-1	vclEx1142	105	wild type	mutated	25	10	7	Young Adult	8	8	0	0	5	21
xbx-1	vclEx1142	105	wild type	mutated	25	10	8	Young Adult	5	4	1	0	5	15
xbx-1	vclEx1142	105	wild type	mutated	25	10	9	Young Adult	3	6	0	0	5	14
xbx-1	vclEx1142	105	wild type	mutated	25	10	10	Young Adult	5	7	0	0	5	17
xbx-1	vclEx1142	105	wild type	mutated	25	10	MEAN	Young Adult	6.6	7.8	0.2	0.2	4.8	19.6
xbx-1	vclEx1142	105	wild type	mutated	25	10	DESVEST	Young Adult	2.36643	2.74064	0.421637	0.421637	0.421637	4.74225

## Sheet: F3 FS2 pval
		Labials							Amphids							Ant. deirid							Post. deirid							Phasmids
ift-20		Tukey's multiple comparisons test	Mean Diff,	95,00% CI of diff,	Significant?	Summary	Adjusted P Value		Tukey's multiple comparisons test	Mean Diff,	95,00% CI of diff,	Significant?	Summary	Adjusted P Value		Tukey's multiple comparisons test	Mean Diff,	95,00% CI of diff,	Significant?	Summary	Adjusted P Value		Tukey's multiple comparisons test	Mean Diff,	95,00% CI of diff,	Significant?	Summary	Adjusted P Value		Tukey's multiple comparisons test	Mean Diff,	95,00% CI of diff,	Significant?	Summary	Adjusted P Value
		wt L1 vs. wt L2	0.3	-3,466 to 4,066	No	ns	0.9999		wt L1 vs. wt L2	-0.9	-4,216 to 2,416	No	ns	0.966		wt L1 vs. wt L2	-0.9	-4,216 to 2,416	No	ns	0.966		wt L1 vs. wt L2	-0.2	-1,010 to 0,6101	No	ns	0.9774		wt L1 vs. wt L2	-0.1	-0,8940 to 0,6940	No	ns	0.999
		wt L1 vs. wt L3	-2.1	-5,866 to 1,666	No	ns	0.5716		wt L1 vs. wt L3	-2.2	-5,516 to 1,116	No	ns	0.3782		wt L1 vs. wt L3	-2.2	-5,516 to 1,116	No	ns	0.3782		wt L1 vs. wt L3	-0.3	-1,110 to 0,5101	No	ns	0.8816		wt L1 vs. wt L3	-0.4	-1,194 to 0,3940	No	ns	0.673
		wt L1 vs. mut L1	12.2	8,434 to 15,97	Yes	****	<0,0001		wt L1 vs. mut L1	6.2	2,884 to 9,516	Yes	****	<0,0001		wt L1 vs. mut L1	6.2	2,884 to 9,516	Yes	****	<0,0001		wt L1 vs. mut L1	1.2	0,3899 to 2,010	Yes	***	0.0008		wt L1 vs. mut L1	0.6	-0,1940 to 1,394	No	ns	0.2402
		wt L1 vs. mut L2	5.2	1,434 to 8,966	Yes	**	0.002		wt L1 vs. mut L2	3.6	0,2841 to 6,916	Yes	*	0.0259		wt L1 vs. mut L2	3.6	0,2841 to 6,916	Yes	*	0.0259		wt L1 vs. mut L2	1.1	0,2899 to 1,910	Yes	**	0.0025		wt L1 vs. mut L2	0.5	-0,2940 to 1,294	No	ns	0.4371
		wt L1 vs. mut L3	6.7	2,934 to 10,47	Yes	****	<0,0001		wt L1 vs. mut L3	4.4	1,084 to 7,716	Yes	**	0.0033		wt L1 vs. mut L3	4.4	1,084 to 7,716	Yes	**	0.0033		wt L1 vs. mut L3	1.1	0,2899 to 1,910	Yes	**	0.0025		wt L1 vs. mut L3	0.3	-0,4940 to 1,094	No	ns	0.8725
		wt L2 vs. wt L3	-2.4	-6,166 to 1,366	No	ns	0.4236		wt L2 vs. wt L3	-1.3	-4,616 to 2,016	No	ns	0.8543		wt L2 vs. wt L3	-1.3	-4,616 to 2,016	No	ns	0.8543		wt L2 vs. wt L3	-0.1	-0,9101 to 0,7101	No	ns	0.9991		wt L2 vs. wt L3	-0.3	-1,094 to 0,4940	No	ns	0.8725
		wt L2 vs. mut L1	11.9	8,134 to 15,67	Yes	****	<0,0001		wt L2 vs. mut L1	7.1	3,784 to 10,42	Yes	****	<0,0001		wt L2 vs. mut L1	7.1	3,784 to 10,42	Yes	****	<0,0001		wt L2 vs. mut L1	1.4	0,5899 to 2,210	Yes	****	<0,0001		wt L2 vs. mut L1	0.7	-0,09399 to 1,494	No	ns	0.1137
		wt L2 vs. mut L2	4.9	1,134 to 8,666	Yes	**	0.0041		wt L2 vs. mut L2	4.5	1,184 to 7,816	Yes	**	0.0025		wt L2 vs. mut L2	4.5	1,184 to 7,816	Yes	**	0.0025		wt L2 vs. mut L2	1.3	0,4899 to 2,110	Yes	***	0.0002		wt L2 vs. mut L2	0.6	-0,1940 to 1,394	No	ns	0.2402
		wt L2 vs. mut L3	6.4	2,634 to 10,17	Yes	****	<0,0001		wt L2 vs. mut L3	5.3	1,984 to 8,616	Yes	***	0.0002		wt L2 vs. mut L3	5.3	1,984 to 8,616	Yes	***	0.0002		wt L2 vs. mut L3	1.3	0,4899 to 2,110	Yes	***	0.0002		wt L2 vs. mut L3	0.4	-0,3940 to 1,194	No	ns	0.673
		wt L3 vs. mut L1	14.3	10,53 to 18,07	Yes	****	<0,0001		wt L3 vs. mut L1	8.4	5,084 to 11,72	Yes	****	<0,0001		wt L3 vs. mut L1	8.4	5,084 to 11,72	Yes	****	<0,0001		wt L3 vs. mut L1	1.5	0,6899 to 2,310	Yes	****	<0,0001		wt L3 vs. mut L1	1	0,2060 to 1,794	Yes	**	0.006
		wt L3 vs. mut L2	7.3	3,534 to 11,07	Yes	****	<0,0001		wt L3 vs. mut L2	5.8	2,484 to 9,116	Yes	****	<0,0001		wt L3 vs. mut L2	5.8	2,484 to 9,116	Yes	****	<0,0001		wt L3 vs. mut L2	1.4	0,5899 to 2,210	Yes	****	<0,0001		wt L3 vs. mut L2	0.9	0,1060 to 1,694	Yes	*	0.0176
		wt L3 vs. mut L3	8.8	5,034 to 12,57	Yes	****	<0,0001		wt L3 vs. mut L3	6.6	3,284 to 9,916	Yes	****	<0,0001		wt L3 vs. mut L3	6.6	3,284 to 9,916	Yes	****	<0,0001		wt L3 vs. mut L3	1.4	0,5899 to 2,210	Yes	****	<0,0001		wt L3 vs. mut L3	0.7	-0,09399 to 1,494	No	ns	0.1137
		mut L1 vs. mut L2	-7	-10,77 to -3,234	Yes	****	<0,0001		mut L1 vs. mut L2	-2.6	-5,916 to 0,7159	No	ns	0.2054		mut L1 vs. mut L2	-2.6	-5,916 to 0,7159	No	ns	0.2054		mut L1 vs. mut L2	-0.1	-0,9101 to 0,7101	No	ns	0.9991		mut L1 vs. mut L2	-0.1	-0,8940 to 0,6940	No	ns	0.999
		mut L1 vs. mut L3	-5.5	-9,266 to -1,734	Yes	***	0.0009		mut L1 vs. mut L3	-1.8	-5,116 to 1,516	No	ns	0.5997		mut L1 vs. mut L3	-1.8	-5,116 to 1,516	No	ns	0.5997		mut L1 vs. mut L3	-0.1	-0,9101 to 0,7101	No	ns	0.9991		mut L1 vs. mut L3	-0.3	-1,094 to 0,4940	No	ns	0.8725
		mut L2 vs. mut L3	1.5	-2,266 to 5,266	No	ns	0.8459		mut L2 vs. mut L3	0.8	-2,516 to 4,116	No	ns	0.9796		mut L2 vs. mut L3	0.8	-2,516 to 4,116	No	ns	0.9796		mut L2 vs. mut L3	0	-0,8101 to 0,8101	No	ns	>0,9999		mut L2 vs. mut L3	-0.2	-0,9940 to 0,5940	No	ns	0.9753
xbx-1 (short)		Tukey's multiple comparisons test	Mean Diff,	95,00% CI of diff,	Significant?	Summary	Adjusted P Value		Tukey's multiple comparisons test	Mean Diff,	95,00% CI of diff,	Significant?	Summary	Adjusted P Value		Tukey's multiple comparisons test	Mean Diff,	95,00% CI of diff,	Significant?	Summary	Adjusted P Value		Tukey's multiple comparisons test	Mean Diff,	95,00% CI of diff,	Significant?	Summary	Adjusted P Value		Tukey's multiple comparisons test	Mean Diff,	95,00% CI of diff,	Significant?	Summary	Adjusted P Value
		wt L1 vs. wt L2	-0.3	-4,215 to 3,615	No	ns	>0,9999		wt L1 vs. wt L2	-0.6	-4,087 to 2,887	No	ns	0.9956		wt L1 vs. wt L2	0.1	-0,8062 to 1,006	No	ns	0.9995		wt L1 vs. wt L2	-0.1	-0,7870 to 0,5870	No	ns	0.998		wt L1 vs. wt L2	-0.2	-1,344 to 0,9443	No	ns	0.9953
		wt L1 vs. wt L3	0.9	-3,015 to 4,815	No	ns	0.9835		wt L1 vs. wt L3	4.4	0,9135 to 7,887	Yes	**	0.0059		wt L1 vs. wt L3	1.1	0,1938 to 2,006	Yes	**	0.009		wt L1 vs. wt L3	0	-0,6870 to 0,6870	No	ns	>0,9999		wt L1 vs. wt L3	0.3	-0,8443 to 1,444	No	ns	0.9707
		wt L1 vs. mut L1	9.3	5,385 to 13,21	Yes	****	<0,0001		wt L1 vs. mut L1	11.2	7,713 to 14,69	Yes	****	<0,0001		wt L1 vs. mut L1	2.3	1,394 to 3,206	Yes	****	<0,0001		wt L1 vs. mut L1	1.2	0,5130 to 1,887	Yes	****	<0,0001		wt L1 vs. mut L1	0.6	-0,5443 to 1,744	No	ns	0.6346
		wt L1 vs. mut L2	7.3	3,385 to 11,21	Yes	****	<0,0001		wt L1 vs. mut L2	13	9,513 to 16,49	Yes	****	<0,0001		wt L1 vs. mut L2	1.6	0,6938 to 2,506	Yes	****	<0,0001		wt L1 vs. mut L2	1.1	0,4130 to 1,787	Yes	***	0.0002		wt L1 vs. mut L2	0.6	-0,5443 to 1,744	No	ns	0.6346
		wt L1 vs. mut L3	13	9,085 to 16,91	Yes	****	<0,0001		wt L1 vs. mut L3	10.6	7,113 to 14,09	Yes	****	<0,0001		wt L1 vs. mut L3	2.3	1,394 to 3,206	Yes	****	<0,0001		wt L1 vs. mut L3	1.2	0,5130 to 1,887	Yes	****	<0,0001		wt L1 vs. mut L3	-0.4	-1,544 to 0,7443	No	ns	0.9048
		wt L2 vs. wt L3	1.2	-2,715 to 5,115	No	ns	0.9434		wt L2 vs. wt L3	5	1,513 to 8,487	Yes	**	0.0012		wt L2 vs. wt L3	1	0,09382 to 1,906	Yes	*	0.0225		wt L2 vs. wt L3	0.1	-0,5870 to 0,7870	No	ns	0.998		wt L2 vs. wt L3	0.5	-0,6443 to 1,644	No	ns	0.7886
		wt L2 vs. mut L1	9.6	5,685 to 13,51	Yes	****	<0,0001		wt L2 vs. mut L1	11.8	8,313 to 15,29	Yes	****	<0,0001		wt L2 vs. mut L1	2.2	1,294 to 3,106	Yes	****	<0,0001		wt L2 vs. mut L1	1.3	0,6130 to 1,987	Yes	****	<0,0001		wt L2 vs. mut L1	0.8	-0,3443 to 1,944	No	ns	0.3205
		wt L2 vs. mut L2	7.6	3,685 to 11,51	Yes	****	<0,0001		wt L2 vs. mut L2	13.6	10,11 to 17,09	Yes	****	<0,0001		wt L2 vs. mut L2	1.5	0,5938 to 2,406	Yes	***	0.0001		wt L2 vs. mut L2	1.2	0,5130 to 1,887	Yes	****	<0,0001		wt L2 vs. mut L2	0.8	-0,3443 to 1,944	No	ns	0.3205
		wt L2 vs. mut L3	13.3	9,385 to 17,21	Yes	****	<0,0001		wt L2 vs. mut L3	11.2	7,713 to 14,69	Yes	****	<0,0001		wt L2 vs. mut L3	2.2	1,294 to 3,106	Yes	****	<0,0001		wt L2 vs. mut L3	1.3	0,6130 to 1,987	Yes	****	<0,0001		wt L2 vs. mut L3	-0.2	-1,344 to 0,9443	No	ns	0.9953
		wt L3 vs. mut L1	8.4	4,485 to 12,31	Yes	****	<0,0001		wt L3 vs. mut L1	6.8	3,313 to 10,29	Yes	****	<0,0001		wt L3 vs. mut L1	1.2	0,2938 to 2,106	Yes	**	0.0033		wt L3 vs. mut L1	1.2	0,5130 to 1,887	Yes	****	<0,0001		wt L3 vs. mut L1	0.3	-0,8443 to 1,444	No	ns	0.9707
		wt L3 vs. mut L2	6.4	2,485 to 10,31	Yes	***	0.0002		wt L3 vs. mut L2	8.6	5,113 to 12,09	Yes	****	<0,0001		wt L3 vs. mut L2	0.5	-0,4062 to 1,406	No	ns	0.5827		wt L3 vs. mut L2	1.1	0,4130 to 1,787	Yes	***	0.0002		wt L3 vs. mut L2	0.3	-0,8443 to 1,444	No	ns	0.9707
		wt L3 vs. mut L3	12.1	8,185 to 16,01	Yes	****	<0,0001		wt L3 vs. mut L3	6.2	2,713 to 9,687	Yes	****	<0,0001		wt L3 vs. mut L3	1.2	0,2938 to 2,106	Yes	**	0.0033		wt L3 vs. mut L3	1.2	0,5130 to 1,887	Yes	****	<0,0001		wt L3 vs. mut L3	-0.7	-1,844 to 0,4443	No	ns	0.4698
		mut L1 vs. mut L2	-2	-5,915 to 1,915	No	ns	0.6598		mut L1 vs. mut L2	1.8	-1,687 to 5,287	No	ns	0.6498		mut L1 vs. mut L2	-0.7	-1,606 to 0,2062	No	ns	0.2192		mut L1 vs. mut L2	-0.1	-0,7870 to 0,5870	No	ns	0.998		mut L1 vs. mut L2	0	-1,144 to 1,144	No	ns	>0,9999
		mut L1 vs. mut L3	3.7	-0,2146 to 7,615	No	ns	0.0741		mut L1 vs. mut L3	-0.6	-4,087 to 2,887	No	ns	0.9956		mut L1 vs. mut L3	0	-0,9062 to 0,9062	No	ns	>0,9999		mut L1 vs. mut L3	0	-0,6870 to 0,6870	No	ns	>0,9999		mut L1 vs. mut L3	-1	-2,144 to 0,1443	No	ns	0.1194
		mut L2 vs. mut L3	5.7	1,785 to 9,615	Yes	***	0.001		mut L2 vs. mut L3	-2.4	-5,887 to 1,087	No	ns	0.3374		mut L2 vs. mut L3	0.7	-0,2062 to 1,606	No	ns	0.2192		mut L2 vs. mut L3	0.1	-0,5870 to 0,7870	No	ns	0.998		mut L2 vs. mut L3	-1	-2,144 to 0,1443	No	ns	0.1194
