# Supplementary material for: Forkhead transcription factor FKH-8 cooperates with RFX in the direct regulation of sensory cilia in Caenorhabditis elegans
Source: eLife. 2023 Jul 14;12:e89702. doi: 10.7554/eLife.89702 (PMC10393296; doi:10.7554/eLife.89702)
Supplement: Figure 3—source data 2. [file elife-89702-fig3-data2.xlsx]

## Sheet: F3FS2 A
xbx-1(short)										8-mers
										ID	Name	Motif ID	Gene ID	Family	Sequence	From	To	Score
										T082933_1.02	daf-16	M0730_1.02	R13H8.1	Forkhead	CTTGTTGA	13	20	0.467187250301454
										T081000_1.02	unc-130	M0749_1.02	C47G2.2	Forkhead	CTTGTTGA	13	20	0.465165726297964
										T138992_1.02	daf-19	M1526_1.02	F33H1.1	RFX	CCGTTTCC	25	32	0.458182370896097
										PWM Energy
										ID	Name	Motif ID	Gene ID	Family	Sequence	From	To	Dir	Score
										T080996_1.02	fkh-6	M0756_1.02	B0286.5	Forkhead	CTTGTTGAA	13	21	R	0.218
										T080997_1.02	fkh-10	M0756_1.02	C25A1.2	Forkhead	CTTGTTGAA	13	21	R	0.218
										T081000_1.02	unc-130	M0756_1.02	C47G2.2	Forkhead	CTTGTTGAA	13	21	R	0.218
										T082661_1.02	pha-4	M0756_1.02	F38A6.1	Forkhead	CTTGTTGAA	13	21	R	0.218
										T082896_1.02	lin-31	M0756_1.02	K10G6.1	Forkhead	CTTGTTGAA	13	21	R	0.218
										T082938_1.02	fkh-2	M0756_1.02	T14G12.4	Forkhead	CTTGTTGAA	13	21	R	0.218
										T138992_1.02	daf-19	M1528_1.02	F33H1.1	RFX	CCATGGTAAC	31	40	F	0.368
										PWM LogOdds
										ID	Name	Motif ID	Gene ID	Family	Sequence	From	To	Dir	Score
										T081000_1.02	unc-130	M2122_1.02	C47G2.2	Forkhead	TTGTTGAA	14	21	R	8808
										T138992_1.02	daf-19	M6077_1.02	F33H1.1	RFX	CGTTTCCATGGTAACC	26	41	R	22514
ift-20										8-mers
										ID	Name	Motif ID	Gene ID	Family	Sequence	From	To	Score
										T318853_2.00	daf-19	M02453_2.00	WBGene00000914	RFX	TCTCCGTC	45	52	0.453095673219401
										T188809_2.00	let-381	M00164_2.00	WBGene00002601	Forkhead	TCAATAAA	55	62	0.4869
										T188812_2.00	pha-4	M00162_2.00	WBGene00004013	Forkhead	TCAATAAA	55	62	0.48262
										T188799_2.00	daf-16	M00794_2.00	WBGene00000912	Forkhead	TCAATAAA	55	62	0.478310530475156
										T188807_2.00	fkh-9	M01226_2.00	WBGene00001441	Forkhead	AATAAATT	57	64	0.494589899491252
										T188810_2.00	lin-31	M01983_2.00	WBGene00003017	Forkhead	GTTTAGCC	66	73	0.498652550001098
										PWM Energy
										ID	Name	Motif ID	Gene ID	Family	Sequence	From	To	Dir	Score
										T188807_2.00	fkh-9	M00663_2.00	WBGene00001441	Forkhead	TTGTTTAGCC	64	73	R	0.216
										T188799_2.00	daf-16	M00798_2.00	WBGene00000912	Forkhead	TTGTTTAGCC	64	73	R	0.31
										T318853_2.00	daf-19	M02452_2.00	WBGene00000914	RFX	ATAGCAAC	82	89	R	0.5
										PWM LogOdds
										ID	Name	Motif ID	Gene ID	Family	Sequence	From	To	Dir	Score
										T188812_2.00	pha-4	M06194_2.00	WBGene00004013	Forkhead	AATTTGTTTAG	61	71	R	8411
										T188810_2.00	lin-31	M00665_2.00	WBGene00003017	Forkhead	TTTGTTTAGCC	63	73	R	9041
										T188807_2.00	fkh-9	M01226_2.00	WBGene00001441	Forkhead	TTGTTTAG	64	71	R	9567
										T188799_2.00	daf-16	M09107_2.00	WBGene00000912	Forkhead	TTGTTTAGC	64	72	R	11181
										T188809_2.00	let-381	M06197_2.00	WBGene00002601	Forkhead	TGTTTAGC	65	72	R	10748
										T318853_2.00	daf-19	M05888_2.00	WBGene00000914	RFX	GTCTCTATAGCAACG	76	90	R	16335
