# Supplementary material for: Forkhead transcription factor FKH-8 cooperates with RFX in the direct regulation of sensory cilia in Caenorhabditis elegans
Source: eLife. 2023 Jul 14;12:e89702. doi: 10.7554/eLife.89702 (PMC10393296; doi:10.7554/eLife.89702)
Supplement: Figure 4—source data 1. [file elife-89702-fig4-data1.xlsx]

## Sheet: F4 C and F4FS2 D
Gene	Reporter	Rep. Lenght	Background	Temp. (º)	N	Worm	Stage	Labial Region	Amphid Region	Anterior Deirid Region	Posterior Deirid Region	Phasmid Region	Neurons
ift-20	otIs395	171	daf-12(sa204)	25	12	1	Young Adult	16	18	3	2	5	44
ift-20	otIs395	171	daf-12(sa204)	25	12	2	Young Adult	12	19	3	2	4	40
ift-20	otIs395	171	daf-12(sa204)	25	12	3	Young Adult	14	17	1	1	5	38
ift-20	otIs395	171	daf-12(sa204)	25	12	4	Young Adult	15	16	3	2	4	40
ift-20	otIs395	171	daf-12(sa204)	25	12	5	Young Adult	17	18	3	2	4	44
ift-20	otIs395	171	daf-12(sa204)	25	12	6	Young Adult	13	14	3	1	4	35
ift-20	otIs395	171	daf-12(sa204)	25	12	7	Young Adult	10	20	2	2	4	38
ift-20	otIs395	171	daf-12(sa204)	25	12	8	Young Adult	14	18	3	2	5	42
ift-20	otIs395	171	daf-12(sa204)	25	12	9	Young Adult	12	20	2	2	4	40
ift-20	otIs395	171	daf-12(sa204)	25	12	10	Young Adult	19	24	2	2	4	51
ift-20	otIs395	171	daf-12(sa204)	25	12	11	Young Adult	17	22	3	2	4	48
ift-20	otIs395	171	daf-12(sa204)	25	12	12	Young Adult	15	21	2	2	5	45
ift-20	otIs395	171	daf-12(sa204)	25	12	ALL	Mean	14.5	18.9167	2.5	1.83333	4.33333	42.0833
ift-20	otIs395	171	daf-12(sa204)	25	12	ALL	SD	2.54058	2.71221	0.6742	0.389249	0.492366	4.54189
ift-20	otIs395	171	daf-19(m86); daf-12(sa204)	25	9	1	Young Adult	8	0	0	0	1	9
ift-20	otIs395	171	daf-19(m86); daf-12(sa204)	25	9	2	Young Adult	6	0	1	0	3	10
ift-20	otIs395	171	daf-19(m86); daf-12(sa204)	25	9	3	Young Adult	10	0	0	0	2	12
ift-20	otIs395	171	daf-19(m86); daf-12(sa204)	25	9	4	Young Adult	7	0	0	0	0	7
ift-20	otIs395	171	daf-19(m86); daf-12(sa204)	25	9	5	Young Adult	9	0	0	0	2	11
ift-20	otIs395	171	daf-19(m86); daf-12(sa204)	25	9	6	Young Adult	9	2	0	0	1	12
ift-20	otIs395	171	daf-19(m86); daf-12(sa204)	25	9	7	Young Adult	13	0	0	0	1	14
ift-20	otIs395	171	daf-19(m86); daf-12(sa204)	25	9	8	Young Adult	9	0	0	0	2	11
ift-20	otIs395	171	daf-19(m86); daf-12(sa204)	25	9	9	Young Adult	5	0	0	0	0	5
ift-20	otIs395	171	daf-19(m86); daf-12(sa204)	25	9	ALL	Mean	8.44444	0.222222	0.111111	0	1.33333	10.1111
ift-20	otIs395	171	daf-19(m86); daf-12(sa204)	25	9	ALL	SD	2.35112	0.666667	0.333333	0	1	2.75882
ift-20	otIs395	171	fkh-8(tm292)	25	10	1	Young Adult	17	23	0	1	5	46
ift-20	otIs395	171	fkh-8(tm292)	25	10	2	Young Adult	22	24	2	2	5	55
ift-20	otIs395	171	fkh-8(tm292)	25	10	3	Young Adult	21	24	2	0	4	51
ift-20	otIs395	171	fkh-8(tm292)	25	10	4	Young Adult	23	24	1	0	4	52
ift-20	otIs395	171	fkh-8(tm292)	25	10	5	Young Adult	17	23	1	1	4	46
ift-20	otIs395	171	fkh-8(tm292)	25	10	6	Young Adult	22	24	1	0	4	51
ift-20	otIs395	171	fkh-8(tm292)	25	10	7	Young Adult	18	24	1	0	4	47
ift-20	otIs395	171	fkh-8(tm292)	25	10	8	Young Adult	18	24	0	0	4	46
ift-20	otIs395	171	fkh-8(tm292)	25	10	9	Young Adult	17	24	0	0	4	45
ift-20	otIs395	171	fkh-8(tm292)	25	10	10	Young Adult	18	24	1	1	4	48
ift-20	otIs395	171	fkh-8(tm292)	25	10	ALL	Mean	19.3	23.8	0.9	0.5	4.2	48.7
ift-20	otIs395	171	fkh-8(tm292)	25	10	ALL	SD	2.40601	0.421637	0.737865	0.707107	0.421637	3.335
ift-20	otIs395	171	fkh-8(tm292); daf-12(sa204)	25	11	1	Young Adult	5	12	0	0	4	21
ift-20	otIs395	171	fkh-8(tm292); daf-12(sa204)	25	11	2	Young Adult	3	15	0	0	4	22
ift-20	otIs395	171	fkh-8(tm292); daf-12(sa204)	25	11	3	Young Adult	3	10	0	0	4	17
ift-20	otIs395	171	fkh-8(tm292); daf-12(sa204)	25	11	4	Young Adult	3	13	0	0	4	20
ift-20	otIs395	171	fkh-8(tm292); daf-12(sa204)	25	11	5	Young Adult	4	12	0	0	4	20
ift-20	otIs395	171	fkh-8(tm292); daf-12(sa204)	25	11	6	Young Adult	1	17	0	0	4	22
ift-20	otIs395	171	fkh-8(tm292); daf-12(sa204)	25	11	7	Young Adult	4	14	0	0	4	22
ift-20	otIs395	171	fkh-8(tm292); daf-12(sa204)	25	11	8	Young Adult	2	12	0	0	4	18
ift-20	otIs395	171	fkh-8(tm292); daf-12(sa204)	25	11	9	Young Adult	2	14	0	0	4	20
ift-20	otIs395	171	fkh-8(tm292); daf-12(sa204)	25	11	10	Young Adult	5	18	0	0	4	27
ift-20	otIs395	171	fkh-8(tm292); daf-12(sa204)	25	11	11	Young Adult	4	15	0	0	4	23
ift-20	otIs395	171	fkh-8(tm292); daf-12(sa204)	25	11	ALL	Mean	3.27273	13.8182	0	0	4	21.0909
ift-20	otIs395	171	fkh-8(tm292); daf-12(sa204)	25	11	ALL	SD	1.27208	2.35874	0	0	0	2.66288
ift-20	otIs395	171	fkh-8(tm292); daf-19(m86); daf-12(sa204)	25	12	1	Young Adult	2	0	0	0	0	2
ift-20	otIs395	171	fkh-8(tm292); daf-19(m86); daf-12(sa204)	25	12	2	Young Adult	2	0	0	0	2	4
ift-20	otIs395	171	fkh-8(tm292); daf-19(m86); daf-12(sa204)	25	12	3	Young Adult	2	0	0	0	2	4
ift-20	otIs395	171	fkh-8(tm292); daf-19(m86); daf-12(sa204)	25	12	4	Young Adult	2	0	0	0	1	3
ift-20	otIs395	171	fkh-8(tm292); daf-19(m86); daf-12(sa204)	25	12	5	Young Adult	2	0	0	0	0	2
ift-20	otIs395	171	fkh-8(tm292); daf-19(m86); daf-12(sa204)	25	12	6	Young Adult	1	0	0	0	2	3
ift-20	otIs395	171	fkh-8(tm292); daf-19(m86); daf-12(sa204)	25	12	7	Young Adult	2	0	0	0	1	3
ift-20	otIs395	171	fkh-8(tm292); daf-19(m86); daf-12(sa204)	25	12	8	Young Adult	3	0	0	0	1	4
ift-20	otIs395	171	fkh-8(tm292); daf-19(m86); daf-12(sa204)	25	12	9	Young Adult	2	0	0	0	1	3
ift-20	otIs395	171	fkh-8(tm292); daf-19(m86); daf-12(sa204)	25	12	10	Young Adult	3	0	0	0	1	4
ift-20	otIs395	171	fkh-8(tm292); daf-19(m86); daf-12(sa204)	25	12	11	Young Adult	2	0	0	0	1	3
ift-20	otIs395	171	fkh-8(tm292); daf-19(m86); daf-12(sa204)	25	12	12	Young Adult	2	0	0	0	0	2
ift-20	otIs395	171	fkh-8(tm292); daf-19(m86); daf-12(sa204)	25	12	ALL	Mean	2.08333	0	0	0	1	3.08333
ift-20	otIs395	171	fkh-8(tm292); daf-19(m86); daf-12(sa204)	25	12	ALL	SD	0.514929	0	0	0	0.738549	0.792961
ift-20	otIs395	171	wild type	25	10	1	Young Adult	22	23	4	2	5	56
ift-20	otIs395	171	wild type	25	10	2	Young Adult	20	23	2	2	5	52
ift-20	otIs395	171	wild type	25	10	3	Young Adult	22	23	1	2	5	53
ift-20	otIs395	171	wild type	25	10	4	Young Adult	23	24	3	2	5	57
ift-20	otIs395	171	wild type	25	10	5	Young Adult	23	23	3	2	4	55
ift-20	otIs395	171	wild type	25	10	6	Young Adult	24	24	3	2	5	58
ift-20	otIs395	171	wild type	25	10	7	Young Adult	24	24	3	2	5	58
ift-20	otIs395	171	wild type	25	10	8	Young Adult	24	24	1	2	5	56
ift-20	otIs395	171	wild type	25	10	9	Young Adult	22	23	2	2	5	54
ift-20	otIs395	171	wild type	25	10	10	Young Adult	24	24	5	2	5	60
ift-20	otIs395	171	wild type	25	10	ALL	Mean	22.8	23.5	2.7	2	4.9	55.9
ift-20	otIs395	171	wild type	25	10	ALL	SD	1.31656	0.527046	1.25167	0	0.316228	2.46982
osm-1	vlcEx815	1770	daf-12(sa204)	25	7	1	Young Adult	16	21	0	0	5	42
osm-1	vlcEx815	1770	daf-12(sa204)	25	7	2	Young Adult	14	16	1	1	4	36
osm-1	vlcEx815	1770	daf-12(sa204)	25	7	3	Young Adult	15	18	1	1	5	40
osm-1	vlcEx815	1770	daf-12(sa204)	25	7	4	Young Adult	14	18	1	2	5	40
osm-1	vlcEx815	1770	daf-12(sa204)	25	7	5	Young Adult	14	19	1	0	3	37
osm-1	vlcEx815	1770	daf-12(sa204)	25	7	6	Young Adult	14	20	1	0	4	39
osm-1	vlcEx815	1770	daf-12(sa204)	25	7	7	Young Adult	16	21	0	0	4	41
osm-1	vlcEx815	1770	daf-12(sa204)	25	7	ALL	Mean	14.7143	19	0.714286	0.571429	4.28571	39.2857
osm-1	vlcEx815	1770	daf-12(sa204)	25	7	ALL	SD	0.95119	1.82574	0.48795	0.786796	0.755929	2.13809
osm-1	vlcEx815	1770	daf-19(m86); daf-12(sa204)	25	12	1	Young Adult	4	2	0	0	2	8
osm-1	vlcEx815	1770	daf-19(m86); daf-12(sa204)	25	12	2	Young Adult	5	2	0	0	2	9
osm-1	vlcEx815	1770	daf-19(m86); daf-12(sa204)	25	12	3	Young Adult	4	1	0	0	2	7
osm-1	vlcEx815	1770	daf-19(m86); daf-12(sa204)	25	12	4	Young Adult	2	7	0	0	2	11
osm-1	vlcEx815	1770	daf-19(m86); daf-12(sa204)	25	12	5	Young Adult	4	2	0	0	2	8
osm-1	vlcEx815	1770	daf-19(m86); daf-12(sa204)	25	12	6	Young Adult	3	7	0	0	1	11
osm-1	vlcEx815	1770	daf-19(m86); daf-12(sa204)	25	12	7	Young Adult	3	2	0	0	2	7
osm-1	vlcEx815	1770	daf-19(m86); daf-12(sa204)	25	12	8	Young Adult	2	4	0	0	2	8
osm-1	vlcEx815	1770	daf-19(m86); daf-12(sa204)	25	12	9	Young Adult	3	2	0	0	2	7
osm-1	vlcEx815	1770	daf-19(m86); daf-12(sa204)	25	12	10	Young Adult	5	3	0	0	2	10
osm-1	vlcEx815	1770	daf-19(m86); daf-12(sa204)	25	12	11	Young Adult	2	4	0	0	1	7
osm-1	vlcEx815	1770	daf-19(m86); daf-12(sa204)	25	12	12	Young Adult	4	5	0	0	2	11
osm-1	vlcEx815	1770	daf-19(m86); daf-12(sa204)	25	12	ALL	Mean	3.41667	3.41667	0	0	1.83333	8.66667
osm-1	vlcEx815	1770	daf-19(m86); daf-12(sa204)	25	12	ALL	SD	1.08362	2.02073	0	0	0.389249	1.66969
osm-1	vlcEx815	1770	fkh-8(tm292)	25	9	1	Young Adult	13	18	0	0	4	35
osm-1	vlcEx815	1770	fkh-8(tm292)	25	9	2	Young Adult	16	24	0	0	3	43
osm-1	vlcEx815	1770	fkh-8(tm292)	25	9	3	Young Adult	12	21	0	0	4	37
osm-1	vlcEx815	1770	fkh-8(tm292)	25	9	4	Young Adult	20	22	0	0	4	46
osm-1	vlcEx815	1770	fkh-8(tm292)	25	9	5	Young Adult	20	24	0	0	5	49
osm-1	vlcEx815	1770	fkh-8(tm292)	25	9	6	Young Adult	16	23	0	0	4	43
osm-1	vlcEx815	1770	fkh-8(tm292)	25	9	7	Young Adult	13	23	0	0	3	39
osm-1	vlcEx815	1770	fkh-8(tm292)	25	9	8	Young Adult	15	23	0	0	4	42
osm-1	vlcEx815	1770	fkh-8(tm292)	25	9	9	Young Adult	18	20	2	0	3	43
osm-1	vlcEx815	1770	fkh-8(tm292)	25	9	ALL	Mean	15.8889	22	0.222222	0	3.77778	41.8889
osm-1	vlcEx815	1770	fkh-8(tm292)	25	9	ALL	SD	2.97676	2	0.666667	0	0.666667	4.34294
osm-1	vlcEx815	1770	fkh-8(tm292); daf-12(sa204)	25	6	1	Young Adult	9	15	0	0	2	26
osm-1	vlcEx815	1770	fkh-8(tm292); daf-12(sa204)	25	6	2	Young Adult	9	16	0	0	2	27
osm-1	vlcEx815	1770	fkh-8(tm292); daf-12(sa204)	25	6	3	Young Adult	12	16	1	0	1	30
osm-1	vlcEx815	1770	fkh-8(tm292); daf-12(sa204)	25	6	4	Young Adult	13	23	1	0	4	41
osm-1	vlcEx815	1770	fkh-8(tm292); daf-12(sa204)	25	6	5	Young Adult	8	15	1	0	4	28
osm-1	vlcEx815	1770	fkh-8(tm292); daf-12(sa204)	25	6	6	Young Adult	11	18	1	0	4	34
osm-1	vlcEx815	1770	fkh-8(tm292); daf-12(sa204)	25	6	ALL	Mean	10.3333	17.1667	0.666667	0	2.83333	31
osm-1	vlcEx815	1770	fkh-8(tm292); daf-12(sa204)	25	6	ALL	SD	1.96638	3.0605	0.516398	0	1.32916	5.65685
osm-1	vlcEx815	1770	fkh-8(tm292); daf-19(m86); daf-12(sa204)	25	12	1	Young Adult	0	4	0	0	2	6
osm-1	vlcEx815	1770	fkh-8(tm292); daf-19(m86); daf-12(sa204)	25	12	2	Young Adult	1	2	0	0	4	7
osm-1	vlcEx815	1770	fkh-8(tm292); daf-19(m86); daf-12(sa204)	25	12	3	Young Adult	0	2	0	0	1	3
osm-1	vlcEx815	1770	fkh-8(tm292); daf-19(m86); daf-12(sa204)	25	12	4	Young Adult	0	4	0	0	2	6
osm-1	vlcEx815	1770	fkh-8(tm292); daf-19(m86); daf-12(sa204)	25	12	5	Young Adult	2	1	0	0	2	5
osm-1	vlcEx815	1770	fkh-8(tm292); daf-19(m86); daf-12(sa204)	25	12	6	Young Adult	2	3	0	0	2	7
osm-1	vlcEx815	1770	fkh-8(tm292); daf-19(m86); daf-12(sa204)	25	12	7	Young Adult	0	2	0	0	2	4
osm-1	vlcEx815	1770	fkh-8(tm292); daf-19(m86); daf-12(sa204)	25	12	8	Young Adult	2	4	0	0	2	8
osm-1	vlcEx815	1770	fkh-8(tm292); daf-19(m86); daf-12(sa204)	25	12	9	Young Adult	0	3	0	0	2	5
osm-1	vlcEx815	1770	fkh-8(tm292); daf-19(m86); daf-12(sa204)	25	12	10	Young Adult	4	4	0	1	2	11
osm-1	vlcEx815	1770	fkh-8(tm292); daf-19(m86); daf-12(sa204)	25	12	11	Young Adult	0	4	0	0	2	6
osm-1	vlcEx815	1770	fkh-8(tm292); daf-19(m86); daf-12(sa204)	25	12	12	Young Adult	0	4	0	0	2	6
osm-1	vlcEx815	1770	fkh-8(tm292); daf-19(m86); daf-12(sa204)	25	12	ALL	Mean	0.916667	3.08333	0	0.0833333	2.08333	6.16667
osm-1	vlcEx815	1770	fkh-8(tm292); daf-19(m86); daf-12(sa204)	25	12	ALL	SD	1.31137	1.08362	0	0.288675	0.668558	2.03753
osm-1	vlcEx815	1770	wild type	25	9	1	Young Adult	20	25	0	0	5	50
osm-1	vlcEx815	1770	wild type	25	9	2	Young Adult	19	17	3	0	5	44
osm-1	vlcEx815	1770	wild type	25	9	3	Young Adult	16	24	0	0	3	43
osm-1	vlcEx815	1770	wild type	25	9	4	Young Adult	20	22	2	1	4	49
osm-1	vlcEx815	1770	wild type	25	9	5	Young Adult	21	22	1	0	5	49
osm-1	vlcEx815	1770	wild type	25	9	6	Young Adult	21	26	0	0	5	52
osm-1	vlcEx815	1770	wild type	25	9	7	Young Adult	20	24	0	0	4	48
osm-1	vlcEx815	1770	wild type	25	9	8	Young Adult	21	22	3	0	5	51
osm-1	vlcEx815	1770	wild type	25	9	9	Young Adult	20	21	2	0	5	48
osm-1	vlcEx815	1770	wild type	25	9	ALL	Mean	19.7778	22.5556	1.22222	0.111111	4.55556	48.2222
osm-1	vlcEx815	1770	wild type	25	9	ALL	SD	1.56347	2.651	1.30171	0.333333	0.726483	2.99073
peli-1	vlcEx835	225	daf-12(sa204)	25	9	1	Young Adult	7	12	1	0	5	25
peli-1	vlcEx835	225	daf-12(sa204)	25	9	2	Young Adult	8	12	2	0	4	26
peli-1	vlcEx835	225	daf-12(sa204)	25	9	3	Young Adult	4	11	2	0	4	21
peli-1	vlcEx835	225	daf-12(sa204)	25	9	4	Young Adult	6	12	0	0	5	23
peli-1	vlcEx835	225	daf-12(sa204)	25	9	5	Young Adult	6	12	2	0	5	25
peli-1	vlcEx835	225	daf-12(sa204)	25	9	6	Young Adult	6	12	2	0	4	24
peli-1	vlcEx835	225	daf-12(sa204)	25	9	7	Young Adult	6	11	1	0	5	23
peli-1	vlcEx835	225	daf-12(sa204)	25	9	8	Young Adult	5	11	2	0	5	23
peli-1	vlcEx835	225	daf-12(sa204)	25	9	9	Young Adult	5	11	2	0	5	23
peli-1	vlcEx835	225	daf-12(sa204)	25	9	ALL	Mean	5.88889	11.5556	1.55556	0	4.66667	23.6667
peli-1	vlcEx835	225	daf-12(sa204)	25	9	ALL	SD	1.16667	0.527046	0.726483	0	0.5	1.5
peli-1	vlcEx835	225	daf-19(m86); daf-12(sa204)	25	10	1	Young Adult	4	0	0	0	0	4
peli-1	vlcEx835	225	daf-19(m86); daf-12(sa204)	25	10	2	Young Adult	4	1	0	0	1	6
peli-1	vlcEx835	225	daf-19(m86); daf-12(sa204)	25	10	3	Young Adult	5	1	1	0	2	9
peli-1	vlcEx835	225	daf-19(m86); daf-12(sa204)	25	10	4	Young Adult	6	1	1	0	1	9
peli-1	vlcEx835	225	daf-19(m86); daf-12(sa204)	25	10	5	Young Adult	4	1	1	0	0	6
peli-1	vlcEx835	225	daf-19(m86); daf-12(sa204)	25	10	6	Young Adult	3	1	0	0	1	5
peli-1	vlcEx835	225	daf-19(m86); daf-12(sa204)	25	10	7	Young Adult	3	2	0	0	1	6
peli-1	vlcEx835	225	daf-19(m86); daf-12(sa204)	25	10	8	Young Adult	4	1	0	0	1	6
peli-1	vlcEx835	225	daf-19(m86); daf-12(sa204)	25	10	9	Young Adult	5	2	1	0	1	9
peli-1	vlcEx835	225	daf-19(m86); daf-12(sa204)	25	10	10	Young Adult	3	3	0	0	1	7
peli-1	vlcEx835	225	daf-19(m86); daf-12(sa204)	25	10	ALL	Mean	4.1	1.3	0.4	0	0.9	6.7
peli-1	vlcEx835	225	daf-19(m86); daf-12(sa204)	25	10	ALL	SD	0.994429	0.823273	0.516398	0	0.567646	1.76698
peli-1	vlcEx835	225	fkh-8(tm292)	25	11	1	Young Adult	4	11	0	0	3	18
peli-1	vlcEx835	225	fkh-8(tm292)	25	11	2	Young Adult	4	5	0	0	3	12
peli-1	vlcEx835	225	fkh-8(tm292)	25	11	3	Young Adult	4	10	0	0	3	17
peli-1	vlcEx835	225	fkh-8(tm292)	25	11	4	Young Adult	4	12	0	0	5	21
peli-1	vlcEx835	225	fkh-8(tm292)	25	11	5	Young Adult	4	10	0	0	4	18
peli-1	vlcEx835	225	fkh-8(tm292)	25	11	6	Young Adult	4	8	0	0	3	15
peli-1	vlcEx835	225	fkh-8(tm292)	25	11	7	Young Adult	4	12	0	0	4	20
peli-1	vlcEx835	225	fkh-8(tm292)	25	11	8	Young Adult	5	12	0	0	4	21
peli-1	vlcEx835	225	fkh-8(tm292)	25	11	9	Young Adult	4	10	0	0	5	19
peli-1	vlcEx835	225	fkh-8(tm292)	25	11	10	Young Adult	5	10	0	0	2	17
peli-1	vlcEx835	225	fkh-8(tm292)	25	11	11	Young Adult	4	13	0	0	4	21
peli-1	vlcEx835	225	fkh-8(tm292)	25	11	ALL	Mean	4.18182	10.2727	0	0	3.63636	18.0909
peli-1	vlcEx835	225	fkh-8(tm292)	25	11	ALL	SD	0.40452	2.24013	0	0	0.924416	2.80908
peli-1	vlcEx835	225	fkh-8(tm292); daf-12(sa204)	25	10	1	Young Adult	3	11	1	0	4	19
peli-1	vlcEx835	225	fkh-8(tm292); daf-12(sa204)	25	10	2	Young Adult	6	17	0	2	5	30
peli-1	vlcEx835	225	fkh-8(tm292); daf-12(sa204)	25	10	3	Young Adult	4	9	0	0	5	18
peli-1	vlcEx835	225	fkh-8(tm292); daf-12(sa204)	25	10	4	Young Adult	4	11	1	0	3	19
peli-1	vlcEx835	225	fkh-8(tm292); daf-12(sa204)	25	10	5	Young Adult	4	11	0	0	4	19
peli-1	vlcEx835	225	fkh-8(tm292); daf-12(sa204)	25	10	6	Young Adult	4	11	0	0	4	19
peli-1	vlcEx835	225	fkh-8(tm292); daf-12(sa204)	25	10	7	Young Adult	5	8	0	0	4	17
peli-1	vlcEx835	225	fkh-8(tm292); daf-12(sa204)	25	10	8	Young Adult	6	10	2	0	4	22
peli-1	vlcEx835	225	fkh-8(tm292); daf-12(sa204)	25	10	9	Young Adult	6	13	1	0	5	25
peli-1	vlcEx835	225	fkh-8(tm292); daf-12(sa204)	25	10	10	Young Adult	3	10	2	0	4	19
peli-1	vlcEx835	225	fkh-8(tm292); daf-12(sa204)	25	10	ALL	Mean	4.5	11.1	0.7	0.2	4.2	20.7
peli-1	vlcEx835	225	fkh-8(tm292); daf-12(sa204)	25	10	ALL	SD	1.17851	2.46982	0.823273	0.632456	0.632456	3.97352
peli-1	vlcEx835	225	fkh-8(tm292); daf-19(m86); daf-12(sa204)	25	12	1	Young Adult	3	1	0	0	0	4
peli-1	vlcEx835	225	fkh-8(tm292); daf-19(m86); daf-12(sa204)	25	12	2	Young Adult	2	2	0	0	0	4
peli-1	vlcEx835	225	fkh-8(tm292); daf-19(m86); daf-12(sa204)	25	12	3	Young Adult	0	0	0	0	0	0
peli-1	vlcEx835	225	fkh-8(tm292); daf-19(m86); daf-12(sa204)	25	12	4	Young Adult	2	0	0	0	0	2
peli-1	vlcEx835	225	fkh-8(tm292); daf-19(m86); daf-12(sa204)	25	12	5	Young Adult	0	1	0	0	0	1
peli-1	vlcEx835	225	fkh-8(tm292); daf-19(m86); daf-12(sa204)	25	12	6	Young Adult	4	0	0	0	0	4
peli-1	vlcEx835	225	fkh-8(tm292); daf-19(m86); daf-12(sa204)	25	12	7	Young Adult	0	0	0	0	0	0
peli-1	vlcEx835	225	fkh-8(tm292); daf-19(m86); daf-12(sa204)	25	12	8	Young Adult	1	1	0	0	0	2
peli-1	vlcEx835	225	fkh-8(tm292); daf-19(m86); daf-12(sa204)	25	12	9	Young Adult	0	2	0	0	0	2
peli-1	vlcEx835	225	fkh-8(tm292); daf-19(m86); daf-12(sa204)	25	12	10	Young Adult	0	0	0	0	0	0
peli-1	vlcEx835	225	fkh-8(tm292); daf-19(m86); daf-12(sa204)	25	12	11	Young Adult	5	0	0	0	0	5
peli-1	vlcEx835	225	fkh-8(tm292); daf-19(m86); daf-12(sa204)	25	12	12	Young Adult	2	1	0	0	0	3
peli-1	vlcEx835	225	fkh-8(tm292); daf-19(m86); daf-12(sa204)	25	12	ALL	Mean	1.58333	0.666667	0	0	0	2.25
peli-1	vlcEx835	225	fkh-8(tm292); daf-19(m86); daf-12(sa204)	25	12	ALL	SD	1.72986	0.778499	0	0	0	1.76455
peli-1	vlcEx835	225	wild type	25	7	1	Young Adult	3	16	0	0	5	24
peli-1	vlcEx835	225	wild type	25	7	2	Young Adult	7	15	0	0	3	25
peli-1	vlcEx835	225	wild type	25	7	3	Young Adult	6	10	0	0	5	21
peli-1	vlcEx835	225	wild type	25	7	4	Young Adult	6	15	0	0	5	26
peli-1	vlcEx835	225	wild type	25	7	5	Young Adult	8	13	0	0	4	25
peli-1	vlcEx835	225	wild type	25	7	6	Young Adult	7	15	0	0	5	27
peli-1	vlcEx835	225	wild type	25	7	7	Young Adult	10	15	0	0	4	29
peli-1	vlcEx835	225	wild type	25	7	ALL	Mean	6.71429	14.1429	0	0	4.42857	25.2857
peli-1	vlcEx835	225	wild type	25	7	ALL	SD	2.13809	2.0354	0	0	0.786796	2.49762
peli-1	vlcEx824	1108	daf-12(sa204)	25	8	1	Young Adult	19	18	2	2	4	45
peli-1	vlcEx824	1108	daf-12(sa204)	25	8	2	Young Adult	20	18	2	1	4	45
peli-1	vlcEx824	1108	daf-12(sa204)	25	8	3	Young Adult	18	18	2	0	3	41
peli-1	vlcEx824	1108	daf-12(sa204)	25	8	4	Young Adult	19	17	2	2	5	45
peli-1	vlcEx824	1108	daf-12(sa204)	25	8	5	Young Adult	19	18	2	2	4	45
peli-1	vlcEx824	1108	daf-12(sa204)	25	8	6	Young Adult	18	17	2	2	2	41
peli-1	vlcEx824	1108	daf-12(sa204)	25	8	7	Young Adult	19	14	2	2	3	40
peli-1	vlcEx824	1108	daf-12(sa204)	25	8	8	Young Adult	18	17	2	2	4	43
peli-1	vlcEx824	1108	daf-12(sa204)	25	8	ALL	Mean	18.75	17.125	2	1.625	3.625	43.125
peli-1	vlcEx824	1108	daf-12(sa204)	25	8	ALL	SD	0.707107	1.3562	0	0.744024	0.916125	2.16712
peli-1	vlcEx824	1108	daf-19(m86); daf-12(sa204)	25	9	1	Young Adult	17	5	1	1	2	26
peli-1	vlcEx824	1108	daf-19(m86); daf-12(sa204)	25	9	2	Young Adult	14	11	2	2	2	31
peli-1	vlcEx824	1108	daf-19(m86); daf-12(sa204)	25	9	3	Young Adult	13	12	2	1	0	28
peli-1	vlcEx824	1108	daf-19(m86); daf-12(sa204)	25	9	4	Young Adult	13	11	2	1	0	27
peli-1	vlcEx824	1108	daf-19(m86); daf-12(sa204)	25	9	5	Young Adult	12	11	2	2	0	27
peli-1	vlcEx824	1108	daf-19(m86); daf-12(sa204)	25	9	6	Young Adult	13	10	2	1	0	26
peli-1	vlcEx824	1108	daf-19(m86); daf-12(sa204)	25	9	7	Young Adult	12	11	2	2	0	27
peli-1	vlcEx824	1108	daf-19(m86); daf-12(sa204)	25	9	8	Young Adult	14	12	2	2	0	30
peli-1	vlcEx824	1108	daf-19(m86); daf-12(sa204)	25	9	9	Young Adult	13	10	3	2	1	29
peli-1	vlcEx824	1108	daf-19(m86); daf-12(sa204)	25	9	ALL	Mean	13.4444	10.3333	2	1.55556	0.555556	27.8889
peli-1	vlcEx824	1108	daf-19(m86); daf-12(sa204)	25	9	ALL	SD	1.50923	2.12132	0.5	0.527046	0.881917	1.76383
peli-1	vlcEx824	1108	fkh-8(tm292)	25	6	1	Young Adult	17	19	0	2	4	42
peli-1	vlcEx824	1108	fkh-8(tm292)	25	6	2	Young Adult	20	18	2	2	4	46
peli-1	vlcEx824	1108	fkh-8(tm292)	25	6	3	Young Adult	18	19	2	2	4	45
peli-1	vlcEx824	1108	fkh-8(tm292)	25	6	4	Young Adult	19	22	2	2	4	49
peli-1	vlcEx824	1108	fkh-8(tm292)	25	6	5	Young Adult	18	19	2	1	3	43
peli-1	vlcEx824	1108	fkh-8(tm292)	25	6	6	Young Adult	17	20	1	2	4	44
peli-1	vlcEx824	1108	fkh-8(tm292)	25	6	ALL	Mean	18.1667	19.5	1.5	1.83333	3.83333	44.8333
peli-1	vlcEx824	1108	fkh-8(tm292)	25	6	ALL	SD	1.16905	1.3784	0.83666	0.408248	0.408248	2.48328
peli-1	vlcEx824	1108	fkh-8(tm292); daf-12(sa204)	25	6	1	Young Adult	18	18	2	2	4	44
peli-1	vlcEx824	1108	fkh-8(tm292); daf-12(sa204)	25	6	2	Young Adult	20	19	2	2	4	47
peli-1	vlcEx824	1108	fkh-8(tm292); daf-12(sa204)	25	6	3	Young Adult	19	22	2	2	4	49
peli-1	vlcEx824	1108	fkh-8(tm292); daf-12(sa204)	25	6	4	Young Adult	22	19	2	2	6	51
peli-1	vlcEx824	1108	fkh-8(tm292); daf-12(sa204)	25	6	5	Young Adult	20	18	2	2	3	45
peli-1	vlcEx824	1108	fkh-8(tm292); daf-12(sa204)	25	6	6	Young Adult	20	16	2	2	4	44
peli-1	vlcEx824	1108	fkh-8(tm292); daf-12(sa204)	25	6	ALL	Mean	19.8333	18.6667	2	2	4.16667	46.6667
peli-1	vlcEx824	1108	fkh-8(tm292); daf-12(sa204)	25	6	ALL	SD	1.32916	1.96638	0	0	0.983192	2.87518
peli-1	vlcEx824	1108	fkh-8(tm292); daf-19(m86); daf-12(sa204)	25	7	1	Young Adult	13	9	1	2	0	25
peli-1	vlcEx824	1108	fkh-8(tm292); daf-19(m86); daf-12(sa204)	25	7	2	Young Adult	14	11	2	2	1	30
peli-1	vlcEx824	1108	fkh-8(tm292); daf-19(m86); daf-12(sa204)	25	7	3	Young Adult	13	9	2	1	0	25
peli-1	vlcEx824	1108	fkh-8(tm292); daf-19(m86); daf-12(sa204)	25	7	4	Young Adult	14	10	2	2	0	28
peli-1	vlcEx824	1108	fkh-8(tm292); daf-19(m86); daf-12(sa204)	25	7	5	Young Adult	13	14	2	2	0	31
peli-1	vlcEx824	1108	fkh-8(tm292); daf-19(m86); daf-12(sa204)	25	7	6	Young Adult	14	12	2	1	1	30
peli-1	vlcEx824	1108	fkh-8(tm292); daf-19(m86); daf-12(sa204)	25	7	7	Young Adult	13	12	2	2	0	29
peli-1	vlcEx824	1108	fkh-8(tm292); daf-19(m86); daf-12(sa204)	25	7	ALL	Mean	13.4286	11	1.85714	1.71429	0.285714	28.2857
peli-1	vlcEx824	1108	fkh-8(tm292); daf-19(m86); daf-12(sa204)	25	7	ALL	SD	0.534522	1.82574	0.377964	0.48795	0.48795	2.42997
peli-1	vlcEx824	1108	wild type	25	6	1	Young Adult	15	18	1	2	3	39
peli-1	vlcEx824	1108	wild type	25	6	2	Young Adult	18	15	1	2	4	40
peli-1	vlcEx824	1108	wild type	25	6	3	Young Adult	20	19	2	2	6	49
peli-1	vlcEx824	1108	wild type	25	6	4	Young Adult	17	21	3	2	6	49
peli-1	vlcEx824	1108	wild type	25	6	5	Young Adult	22	19	1	2	5	49
peli-1	vlcEx824	1108	wild type	25	6	6	Young Adult	16	18	3	2	5	44
peli-1	vlcEx824	1108	wild type	25	6	ALL	Mean	18	18.3333	1.83333	2	4.83333	45
peli-1	vlcEx824	1108	wild type	25	6	ALL	SD	2.60768	1.96638	0.983192	0	1.16905	4.69042
xbx-1	vlcEx1137	105	daf-12(sa204)	25	5	1	Young Adult	18	16	0	2	3	39
xbx-1	vlcEx1137	105	daf-12(sa204)	25	5	2	Young Adult	19	15	3	2	4	43
xbx-1	vlcEx1137	105	daf-12(sa204)	25	5	3	Young Adult	16	15	3	1	4	39
xbx-1	vlcEx1137	105	daf-12(sa204)	25	5	4	Young Adult	19	20	6	2	4	51
xbx-1	vlcEx1137	105	daf-12(sa204)	25	5	5	Young Adult	17	16	3	2	3	41
xbx-1	vlcEx1137	105	daf-12(sa204)	25	5	ALL	Mean	17.8	16.4	3	1.8	3.6	42.6
xbx-1	vlcEx1137	105	daf-12(sa204)	25	5	ALL	SD	1.30384	2.07364	2.12132	0.447214	0.547723	4.97996
xbx-1	vlcEx1137	105	daf-19(m86); daf-12(sa204)	25	12	1	Young Adult	4	0	0	0	2	6
xbx-1	vlcEx1137	105	daf-19(m86); daf-12(sa204)	25	12	2	Young Adult	4	0	0	0	2	6
xbx-1	vlcEx1137	105	daf-19(m86); daf-12(sa204)	25	12	3	Young Adult	7	0	0	0	0	7
xbx-1	vlcEx1137	105	daf-19(m86); daf-12(sa204)	25	12	4	Young Adult	5	0	2	1	1	9
xbx-1	vlcEx1137	105	daf-19(m86); daf-12(sa204)	25	12	5	Young Adult	6	0	0	0	0	6
xbx-1	vlcEx1137	105	daf-19(m86); daf-12(sa204)	25	12	6	Young Adult	5	0	1	0	1	7
xbx-1	vlcEx1137	105	daf-19(m86); daf-12(sa204)	25	12	7	Young Adult	4	0	0	1	1	6
xbx-1	vlcEx1137	105	daf-19(m86); daf-12(sa204)	25	12	8	Young Adult	4	0	0	0	1	5
xbx-1	vlcEx1137	105	daf-19(m86); daf-12(sa204)	25	12	9	Young Adult	6	0	1	0	1	8
xbx-1	vlcEx1137	105	daf-19(m86); daf-12(sa204)	25	12	10	Young Adult	4	0	0	0	1	5
xbx-1	vlcEx1137	105	daf-19(m86); daf-12(sa204)	25	12	11	Young Adult	4	0	0	1	0	5
xbx-1	vlcEx1137	105	daf-19(m86); daf-12(sa204)	25	12	12	Young Adult	6	0	0	0	2	8
xbx-1	vlcEx1137	105	daf-19(m86); daf-12(sa204)	25	12	ALL	Mean	4.91667	0	0.333333	0.25	1	6.5
xbx-1	vlcEx1137	105	daf-19(m86); daf-12(sa204)	25	12	ALL	SD	1.08362	0	0.651339	0.452267	0.738549	1.31426
xbx-1	vlcEx1137	105	fkh-8(tm292)	25	6	1	Young Adult	20	18	0	0	3	41
xbx-1	vlcEx1137	105	fkh-8(tm292)	25	6	2	Young Adult	21	20	2	0	5	48
xbx-1	vlcEx1137	105	fkh-8(tm292)	25	6	3	Young Adult	17	19	1	0	4	41
xbx-1	vlcEx1137	105	fkh-8(tm292)	25	6	4	Young Adult	20	20	1	0	4	45
xbx-1	vlcEx1137	105	fkh-8(tm292)	25	6	5	Young Adult	20	19	2	1	5	47
xbx-1	vlcEx1137	105	fkh-8(tm292)	25	6	6	Young Adult	18	16	1	0	3	38
xbx-1	vlcEx1137	105	fkh-8(tm292)	25	6	ALL	Mean	19.3333	18.6667	1.16667	0.166667	4	43.3333
xbx-1	vlcEx1137	105	fkh-8(tm292)	25	6	ALL	SD	1.50555	1.50555	0.752773	0.408248	0.894427	3.93277
xbx-1	vlcEx1137	105	fkh-8(tm292); daf-12(sa204)	25	9	1	Young Adult	18	11	1	1	1	32
xbx-1	vlcEx1137	105	fkh-8(tm292); daf-12(sa204)	25	9	2	Young Adult	16	15	2	0	4	37
xbx-1	vlcEx1137	105	fkh-8(tm292); daf-12(sa204)	25	9	3	Young Adult	15	14	2	0	2	33
xbx-1	vlcEx1137	105	fkh-8(tm292); daf-12(sa204)	25	9	4	Young Adult	17	11	1	0	4	33
xbx-1	vlcEx1137	105	fkh-8(tm292); daf-12(sa204)	25	9	5	Young Adult	21	16	1	1	4	43
xbx-1	vlcEx1137	105	fkh-8(tm292); daf-12(sa204)	25	9	6	Young Adult	15	13	2	0	3	33
xbx-1	vlcEx1137	105	fkh-8(tm292); daf-12(sa204)	25	9	7	Young Adult	15	15	1	0	5	36
xbx-1	vlcEx1137	105	fkh-8(tm292); daf-12(sa204)	25	9	8	Young Adult	15	13	2	0	1	31
xbx-1	vlcEx1137	105	fkh-8(tm292); daf-12(sa204)	25	9	9	Young Adult	14	11	1	0	2	28
xbx-1	vlcEx1137	105	fkh-8(tm292); daf-12(sa204)	25	9	ALL	Mean	16.2222	13.2222	1.44444	0.222222	2.88889	34
xbx-1	vlcEx1137	105	fkh-8(tm292); daf-12(sa204)	25	9	ALL	SD	2.16667	1.92209	0.527046	0.440959	1.45297	4.272
xbx-1	vlcEx1137	105	fkh-8(tm292); daf-19(m86); daf-12(sa204)	25	12	1	Young Adult	4	0	1	0	1	6
xbx-1	vlcEx1137	105	fkh-8(tm292); daf-19(m86); daf-12(sa204)	25	12	2	Young Adult	5	0	0	0	4	9
xbx-1	vlcEx1137	105	fkh-8(tm292); daf-19(m86); daf-12(sa204)	25	12	3	Young Adult	2	0	0	0	1	3
xbx-1	vlcEx1137	105	fkh-8(tm292); daf-19(m86); daf-12(sa204)	25	12	4	Young Adult	4	0	2	0	1	7
xbx-1	vlcEx1137	105	fkh-8(tm292); daf-19(m86); daf-12(sa204)	25	12	5	Young Adult	4	0	0	1	3	8
xbx-1	vlcEx1137	105	fkh-8(tm292); daf-19(m86); daf-12(sa204)	25	12	6	Young Adult	5	0	2	0	2	9
xbx-1	vlcEx1137	105	fkh-8(tm292); daf-19(m86); daf-12(sa204)	25	12	7	Young Adult	4	0	1	1	2	8
xbx-1	vlcEx1137	105	fkh-8(tm292); daf-19(m86); daf-12(sa204)	25	12	8	Young Adult	2	0	0	0	0	2
xbx-1	vlcEx1137	105	fkh-8(tm292); daf-19(m86); daf-12(sa204)	25	12	9	Young Adult	4	0	1	0	0	5
xbx-1	vlcEx1137	105	fkh-8(tm292); daf-19(m86); daf-12(sa204)	25	12	10	Young Adult	5	0	0	0	1	6
xbx-1	vlcEx1137	105	fkh-8(tm292); daf-19(m86); daf-12(sa204)	25	12	11	Young Adult	4	0	1	0	1	6
xbx-1	vlcEx1137	105	fkh-8(tm292); daf-19(m86); daf-12(sa204)	25	12	12	Young Adult	4	0	0	0	2	6
xbx-1	vlcEx1137	105	fkh-8(tm292); daf-19(m86); daf-12(sa204)	25	12	ALL	Mean	3.91667	0	0.666667	0.166667	1.5	6.25
xbx-1	vlcEx1137	105	fkh-8(tm292); daf-19(m86); daf-12(sa204)	25	12	ALL	SD	0.996205	0	0.778499	0.389249	1.16775	2.17945
xbx-1	vlcEx1137	105	wild type	25	5	1	Young Adult	19	17	3	2	5	46
xbx-1	vlcEx1137	105	wild type	25	5	2	Young Adult	17	16	2	2	5	42
xbx-1	vlcEx1137	105	wild type	25	5	3	Young Adult	20	21	3	2	5	51
xbx-1	vlcEx1137	105	wild type	25	5	4	Young Adult	20	22	3	1	3	49
xbx-1	vlcEx1137	105	wild type	25	5	5	Young Adult	21	17	2	1	5	46
xbx-1	vlcEx1137	105	wild type	25	5	ALL	Mean	19.4	18.6	2.6	1.6	4.6	46.8
xbx-1	vlcEx1137	105	wild type	25	5	ALL	SD	1.51658	2.70185	0.547723	0.547723	0.894427	3.42053
xbx-1	vlcEx822	370	daf-12(sa204)	25	6	1	Young Adult	22	20	3	2	4	51
xbx-1	vlcEx822	370	daf-12(sa204)	25	6	2	Young Adult	20	21	3	2	5	51
xbx-1	vlcEx822	370	daf-12(sa204)	25	6	3	Young Adult	19	19	2	2	4	46
xbx-1	vlcEx822	370	daf-12(sa204)	25	6	4	Young Adult	20	18	2	2	4	46
xbx-1	vlcEx822	370	daf-12(sa204)	25	6	5	Young Adult	18	21	3	2	5	49
xbx-1	vlcEx822	370	daf-12(sa204)	25	6	6	Young Adult	19	20	3	2	4	48
xbx-1	vlcEx822	370	daf-12(sa204)	25	6	ALL	Mean	19.6667	19.8333	2.66667	2	4.33333	48.5
xbx-1	vlcEx822	370	daf-12(sa204)	25	6	ALL	SD	1.36626	1.16905	0.516398	0	0.516398	2.25832
xbx-1	vlcEx822	370	daf-19(m86); daf-12(sa204)	25	12	1	Young Adult	10	4	2	2	5	23
xbx-1	vlcEx822	370	daf-19(m86); daf-12(sa204)	25	12	2	Young Adult	9	5	2	2	4	22
xbx-1	vlcEx822	370	daf-19(m86); daf-12(sa204)	25	12	3	Young Adult	10	4	0	1	1	16
xbx-1	vlcEx822	370	daf-19(m86); daf-12(sa204)	25	12	4	Young Adult	11	2	2	1	3	19
xbx-1	vlcEx822	370	daf-19(m86); daf-12(sa204)	25	12	5	Young Adult	9	4	2	2	4	21
xbx-1	vlcEx822	370	daf-19(m86); daf-12(sa204)	25	12	6	Young Adult	8	4	2	1	2	17
xbx-1	vlcEx822	370	daf-19(m86); daf-12(sa204)	25	12	7	Young Adult	8	6	2	2	5	23
xbx-1	vlcEx822	370	daf-19(m86); daf-12(sa204)	25	12	8	Young Adult	10	3	2	2	5	22
xbx-1	vlcEx822	370	daf-19(m86); daf-12(sa204)	25	12	9	Young Adult	9	5	2	2	5	23
xbx-1	vlcEx822	370	daf-19(m86); daf-12(sa204)	25	12	10	Young Adult	11	4	2	2	3	22
xbx-1	vlcEx822	370	daf-19(m86); daf-12(sa204)	25	12	11	Young Adult	12	3	2	2	5	24
xbx-1	vlcEx822	370	daf-19(m86); daf-12(sa204)	25	12	12	Young Adult	11	4	1	2	3	21
xbx-1	vlcEx822	370	daf-19(m86); daf-12(sa204)	25	12	ALL	Mean	9.83333	4	1.75	1.75	3.75	21.0833
xbx-1	vlcEx822	370	daf-19(m86); daf-12(sa204)	25	12	ALL	SD	1.2673	1.04447	0.621582	0.452267	1.3568	2.50303
xbx-1	vlcEx822	370	fkh-8(tm292)	25	5	1	Young Adult	21	24	3	2	5	55
xbx-1	vlcEx822	370	fkh-8(tm292)	25	5	2	Young Adult	19	24	3	1	3	50
xbx-1	vlcEx822	370	fkh-8(tm292)	25	5	3	Young Adult	21	22	2	2	4	51
xbx-1	vlcEx822	370	fkh-8(tm292)	25	5	4	Young Adult	21	23	2	2	4	52
xbx-1	vlcEx822	370	fkh-8(tm292)	25	5	5	Young Adult	21	23	2	2	5	53
xbx-1	vlcEx822	370	fkh-8(tm292)	25	5	ALL	Mean	20.6	23.2	2.4	1.8	4.2	52.2
xbx-1	vlcEx822	370	fkh-8(tm292)	25	5	ALL	SD	0.894427	0.83666	0.547723	0.447214	0.83666	1.92354
xbx-1	vlcEx822	370	fkh-8(tm292); daf-12(sa204)	25	7	1	Young Adult	16	15	3	2	3	39
xbx-1	vlcEx822	370	fkh-8(tm292); daf-12(sa204)	25	7	2	Young Adult	18	16	2	0	2	38
xbx-1	vlcEx822	370	fkh-8(tm292); daf-12(sa204)	25	7	3	Young Adult	18	15	2	2	4	41
xbx-1	vlcEx822	370	fkh-8(tm292); daf-12(sa204)	25	7	4	Young Adult	17	17	3	2	5	44
xbx-1	vlcEx822	370	fkh-8(tm292); daf-12(sa204)	25	7	5	Young Adult	17	17	4	2	3	43
xbx-1	vlcEx822	370	fkh-8(tm292); daf-12(sa204)	25	7	6	Young Adult	17	17	3	2	3	42
xbx-1	vlcEx822	370	fkh-8(tm292); daf-12(sa204)	25	7	7	Young Adult	18	18	1	1	2	40
xbx-1	vlcEx822	370	fkh-8(tm292); daf-12(sa204)	25	7	ALL	Mean	17.2857	16.4286	2.57143	1.57143	3.14286	41
xbx-1	vlcEx822	370	fkh-8(tm292); daf-12(sa204)	25	7	ALL	SD	0.755929	1.13389	0.9759	0.786796	1.06904	2.16025
xbx-1	vlcEx822	370	fkh-8(tm292); daf-19(m86); daf-12(sa204)	25	12	1	Young Adult	7	0	4	2	2	15
xbx-1	vlcEx822	370	fkh-8(tm292); daf-19(m86); daf-12(sa204)	25	12	2	Young Adult	8	0	2	2	2	14
xbx-1	vlcEx822	370	fkh-8(tm292); daf-19(m86); daf-12(sa204)	25	12	3	Young Adult	8	0	4	1	3	16
xbx-1	vlcEx822	370	fkh-8(tm292); daf-19(m86); daf-12(sa204)	25	12	4	Young Adult	7	0	3	2	3	15
xbx-1	vlcEx822	370	fkh-8(tm292); daf-19(m86); daf-12(sa204)	25	12	5	Young Adult	10	0	4	2	2	18
xbx-1	vlcEx822	370	fkh-8(tm292); daf-19(m86); daf-12(sa204)	25	12	6	Young Adult	9	0	3	1	2	15
xbx-1	vlcEx822	370	fkh-8(tm292); daf-19(m86); daf-12(sa204)	25	12	7	Young Adult	11	0	3	2	2	18
xbx-1	vlcEx822	370	fkh-8(tm292); daf-19(m86); daf-12(sa204)	25	12	8	Young Adult	6	0	3	1	2	12
xbx-1	vlcEx822	370	fkh-8(tm292); daf-19(m86); daf-12(sa204)	25	12	9	Young Adult	9	0	3	2	2	16
xbx-1	vlcEx822	370	fkh-8(tm292); daf-19(m86); daf-12(sa204)	25	12	10	Young Adult	8	0	2	2	2	14
xbx-1	vlcEx822	370	fkh-8(tm292); daf-19(m86); daf-12(sa204)	25	12	11	Young Adult	9	0	3	2	2	16
xbx-1	vlcEx822	370	fkh-8(tm292); daf-19(m86); daf-12(sa204)	25	12	12	Young Adult	8	0	4	2	3	17
xbx-1	vlcEx822	370	fkh-8(tm292); daf-19(m86); daf-12(sa204)	25	12	ALL	Mean	8.33333	0	3.16667	1.75	2.25	15.5
xbx-1	vlcEx822	370	fkh-8(tm292); daf-19(m86); daf-12(sa204)	25	12	ALL	SD	1.37069	0	0.717741	0.452267	0.452267	1.73205
xbx-1	vlcEx822	370	wild type	25	5	1	Young Adult	21	26	2	2	5	56
xbx-1	vlcEx822	370	wild type	25	5	2	Young Adult	18	21	3	1	3	46
xbx-1	vlcEx822	370	wild type	25	5	3	Young Adult	20	25	2	1	5	53
xbx-1	vlcEx822	370	wild type	25	5	4	Young Adult	20	24	2	1	5	52
xbx-1	vlcEx822	370	wild type	25	5	5	Young Adult	21	25	2	1	4	53
xbx-1	vlcEx822	370	wild type	25	5	ALL	Mean	20	24.2	2.2	1.2	4.4	52
xbx-1	vlcEx822	370	wild type	25	5	ALL	SD	1.22474	1.92354	0.447214	0.447214	0.894427	3.67423

## Sheet: F4 C and F4FS2 pval
REPORTERS (expression defects)													SYNERGY: (Fold change over sa204 and multiplicative model)
Background 1	Background 2	ift-20	osm-1	peli-1s	peli-1l	xbx-1s	xbx-1l		Bonferroni				ift-20	wild type	daf-12(sa204)	fkh-8(tm292)	fkh-8(tm292); daf-12(sa204)	daf-19(m86); daf-12(sa204)	fkh-8(tm292); daf-19(m86); daf-12(sa204)
wild type	fkh-8(tm292)	3.28055e-05	0.00238307	4.67258e-05	0.940202	0.157577	0.916784		0.00333333				1	1.33069	1.04554	1.09307	0.49901	0.213861	0.0475248
wild type	daf-12(sa204)	3.77206e-08	1.06277e-05	0.128701	0.334193	0.158675	0.0836653						2	1.23564	0.950495	1.30693	0.522772	0.237624	0.0950495
wild type	fkh-8(tm292); daf-12(sa204)	1.00619e-17	3.1932e-06	0.0168008	0.475116	9.52773e-05	6.38871e-05						3	1.25941	0.90297	1.21188	0.40396	0.285149	0.0950495
wild type	daf-19(m86); daf-12(sa204)	6.40302e-18	1.56511e-19	1.39392e-11	0.000147086	4.78296e-06	2.56072e-12						4	1.35446	0.950495	1.23564	0.475248	0.166337	0.0712871
wild type	fkh-8(tm292); daf-19(m86); daf-12(sa204)	4.51628e-15	1.79079e-19	1.98648e-14	4.79915e-06	9.9096e-15	6.69052e-06						5	1.30693	1.04554	1.09307	0.475248	0.261386	0.0475248
fkh-8(tm292)	daf-12(sa204)	0.00106727	0.169813	4.41413e-05	0.194912	0.790681	0.0179548						6	1.37822	0.831683	1.21188	0.522772	0.285149	0.0712871
fkh-8(tm292)	fkh-8(tm292); daf-12(sa204)	1.2405e-14	0.000992682	0.0961022	0.264533	0.000908422	3.24598e-06						7	1.37822	0.90297	1.11683	0.522772	0.332673	0.0712871
fkh-8(tm292)	daf-19(m86); daf-12(sa204)	1.76871e-15	1.2904e-09	1.13471e-09	8.9974e-10	1.16242e-06	1.41543e-13						8	1.33069	0.99802	1.09307	0.427723	0.261386	0.0950495
fkh-8(tm292)	fkh-8(tm292); daf-19(m86); daf-12(sa204)	1.81811e-12	2.15023e-10	2.02377e-13	1.05136e-07	2.40032e-07	1.96761e-16						9	1.28317	0.950495	1.06931	0.475248	0.118812	0.0712871
daf-12(sa204)	fkh-8(tm292); daf-12(sa204)	9.89443e-12	0.0139421	0.0491518	0.0216891	0.0051645	9.46135e-05						10	1.42574	1.21188	1.14059	0.641584		0.0950495
daf-12(sa204)	daf-19(m86); daf-12(sa204)	1.15269e-13	3.00622e-17	4.57831e-14	7.93041e-11	6.04311e-05	1.46997e-13						11		1.14059		0.546535		0.0712871
daf-12(sa204)	fkh-8(tm292); daf-19(m86); daf-12(sa204)	2.72323e-12	5.53064e-17	2.83044e-17	1.26811e-08	1.1101e-12	1.87874e-16						12		1.06931				0.0475248
fkh-8(tm292); daf-12(sa204)	daf-19(m86); daf-12(sa204)	4.20697e-08	0.000139356	2.17891e-07	7.34169e-10	1.3692e-08	2.60303e-11							1.32832	1	1.15723	0.50117	0.240264	0.0732673	Observed
fkh-8(tm292); daf-12(sa204)	fkh-8(tm292); daf-19(m86); daf-12(sa204)	9.79145e-11	6.63542e-05	1.25141e-08	7.59553e-08	1.57501e-09	5.23146e-11							0.0586887	0.107926	0.0792475	0.0632763	0.0655562	0.0188426	SD
daf-19(m86); daf-12(sa204)	fkh-8(tm292); daf-19(m86); daf-12(sa204)	4.04241e-05	0.00335996	9.30588e-06	0.710112	0.736874	2.14961e-06												0.120413	Expected
																			0.0480578	Error
																			-8.66746	t test
																			3.02504e-06	p-value
													osm-1	wild type	daf-12(sa204)	fkh-8(tm292)	fkh-8(tm292); daf-12(sa204)	daf-19(m86); daf-12(sa204)	fkh-8(tm292); daf-19(m86); daf-12(sa204)
													1	1.27273	1.06909	0.890909	0.661818	0.203636	0.152727
													2	1.12	0.916364	1.09455	0.687273	0.229091	0.178182
													3	1.09455	1.01818	0.941818	0.763636	0.178182	0.0763636
													4	1.24727	1.01818	1.17091	1.04364	0.28	0.152727
													5	1.24727	0.941818	1.24727	0.712727	0.203636	0.127273
													6	1.32364	0.992727	1.09455	0.865455	0.28	0.178182
													7	1.22182	1.04364	0.992727		0.178182	0.101818
													8	1.29818		1.06909		0.203636	0.203636
													9	1.22182		1.09455		0.178182	0.127273
													10					0.254545	0.28
													11					0.178182	0.152727
													12					0.28	0.152727
														1.22747	1	1.06626	0.789091	0.220606	0.15697	Observed
														0.0761276	0.0544241	0.110548	0.143993	0.0425013	0.0518643	SD
																			0.174078	Expected
																			0.065303	Error
																			-1.14271	t test
																			0.277422	p-value
													peli-1(short)	wild type	daf-12(sa204)	fkh-8(tm292)	fkh-8(tm292); daf-12(sa204)	daf-19(m86); daf-12(sa204)	fkh-8(tm292); daf-19(m86); daf-12(sa204)
													1	1.01408	1.05634	0.760563	0.802817	0.169014	0.169014
													2	1.05634	1.09859	0.507042	1.26761	0.253521	0.169014
													3	0.887324	0.887324	0.71831	0.760563	0.380282	0
													4	1.09859	0.971831	0.887324	0.802817	0.380282	0.084507
													5	1.05634	1.05634	0.760563	0.802817	0.253521	0.0422535
													6	1.14085	1.01408	0.633803	0.802817	0.211268	0.169014
													7	1.22535	0.971831	0.84507	0.71831	0.253521	0
													8		0.971831	0.887324	0.929577	0.253521	0.084507
													9		0.971831	0.802817	1.05634	0.380282	0.084507
													10			0.71831	0.802817	0.295775	0
													11			0.887324			0.211268
													12						0.126761
														1.06841	1	0.764405	0.874648	0.283099	0.0950704	Observed
														0.105533	0.0633803	0.118693	0.167895	0.0746612	0.0745584	SD
																			0.247612	Expected
																			0.112833	Error
																			-7.0873	t test
																			2.02618e-05	p-value
													peli-1(long)	wild type	daf-12(sa204)	fkh-8(tm292)	fkh-8(tm292); daf-12(sa204)	daf-19(m86); daf-12(sa204)	fkh-8(tm292); daf-19(m86); daf-12(sa204)
													1	0.904348	1.04348	0.973913	1.02029	0.602899	0.57971
													2	0.927536	1.04348	1.06667	1.08986	0.718841	0.695652
													3	1.13623	0.950725	1.04348	1.13623	0.649275	0.57971
													4	1.13623	1.04348	1.13623	1.18261	0.626087	0.649275
													5	1.13623	1.04348	0.997101	1.04348	0.626087	0.718841
													6	1.02029	0.950725	1.02029	1.02029	0.602899	0.695652
													7		0.927536			0.626087	0.672464
													8		0.997101			0.695652
													9					0.672464
													10
													11
													12
														1.04348	1	1.03961	1.08213	0.646699	0.655901	Observed
														0.108763	0.0502522	0.0575832	0.0666709	0.0409005	0.0563472	SD
																			0.699809	Expected
																			0.0873755	Error
																			-2.06171	t test
																			0.0848549	p-value
													xbx-1(short)	wild type	daf-12(sa204)	fkh-8(tm292)	fkh-8(tm292); daf-12(sa204)	daf-19(m86); daf-12(sa204)	fkh-8(tm292); daf-19(m86); daf-12(sa204)
													1	1.07981	0.915493	0.962441	0.751174	0.140845	0.140845
													2	0.985915	1.00939	1.12676	0.868545	0.140845	0.211268
													3	1.19718	0.915493	0.962441	0.774648	0.164319	0.0704225
													4	1.15023	1.19718	1.05634	0.774648	0.211268	0.164319
													5	1.07981	0.962441	1.10329	1.00939	0.140845	0.187793
													6			0.892019	0.774648	0.164319	0.211268
													7				0.84507	0.140845	0.187793
													8				0.7277	0.117371	0.0469484
													9				0.657277	0.187793	0.117371
													10					0.117371	0.140845
													11					0.117371	0.140845
													12					0.187793	0.140845
														1.09859	1	1.01721	0.798122	0.152582	0.146714	Observed
														0.080294	0.1169	0.0923185	0.100282	0.0308511	0.0511608	SD
																			0.121779	Expected
																			0.0399242	Error
																			1.68831	t test
																			0.119465	p-value
													xbx-1(long)	wild type	daf-12(sa204)	fkh-8(tm292)	fkh-8(tm292); daf-12(sa204)	daf-19(m86); daf-12(sa204)	fkh-8(tm292); daf-19(m86); daf-12(sa204)
													1	1.15464	1.05155	1.13402	0.804124	0.474227	0.309278
													2	0.948454	1.05155	1.03093	0.783505	0.453608	0.28866
													3	1.09278	0.948454	1.05155	0.845361	0.329897	0.329897
													4	1.07216	0.948454	1.07216	0.907216	0.391753	0.309278
													5	1.09278	1.01031	1.09278	0.886598	0.43299	0.371134
													6		0.989691		0.865979	0.350515	0.309278
													7				0.824742	0.474227	0.371134
													8					0.453608	0.247423
													9					0.474227	0.329897
													10					0.453608	0.28866
													11					0.494845	0.329897
													12					0.43299	0.350515
														1.07216	1	1.07629	0.845361	0.434708	0.319588	Observed
														0.0757574	0.0465633	0.0396606	0.0445412	0.0516088	0.0357124	SD
																			0.367485	Expected
																			0.0629905	Error
																			-4.64605	t test
																			0.000709628	p-value

## Sheet: F4 FS2 B
	wild type	ASK	ADL	ASI	AWB	ASH	ASJ	PHA	PHB
	GFP ON	12	16	17	9	11	9	11	16
	GFP OFF	8	4	3	10	8	11	9	4
	DiD(+) Neurons	20	20	20	19	19	20	20	20
	fkh-8(vlc43) II	ASK	ADL	ASI	AWB	ASH	ASJ	PHA	PHB
	GFP ON	15	17	17	9	9	13	13	15
	GFP OFF	5	3	3	11	11	7	7	5
	DiD(+) Neurons	20	20	20	20	20	20	20	20
	2-tailed Fisher	0.500603	1	1	1	0.527254	0.340644	0.747527	1

## Sheet: F4 D
Track	Strain	Background	Reporter (R)	Reporter (G)	T (ºC)	Worm	Neuron Class	Neuron R	Neuron RG
1	NFB2720	daf-12(sa204) X	otIs181[dat-1::mCherry; ttx-3::mCherry] III	vlcEx815 [osm-1::NLS::GFP; rol-6(su1006)]	25	1	CEPV	2	2
2	NFB2720	daf-12(sa204) X	otIs181[dat-1::mCherry; ttx-3::mCherry] III	vlcEx815 [osm-1::NLS::GFP; rol-6(su1006)]	25	2	CEPV	2	2
3	NFB2720	daf-12(sa204) X	otIs181[dat-1::mCherry; ttx-3::mCherry] III	vlcEx815 [osm-1::NLS::GFP; rol-6(su1006)]	25	3	CEPV	2	2
4	NFB2720	daf-12(sa204) X	otIs181[dat-1::mCherry; ttx-3::mCherry] III	vlcEx815 [osm-1::NLS::GFP; rol-6(su1006)]	25	4	CEPV	2	1
5	NFB2720	daf-12(sa204) X	otIs181[dat-1::mCherry; ttx-3::mCherry] III	vlcEx815 [osm-1::NLS::GFP; rol-6(su1006)]	25	5	CEPV	2	1
6	NFB2720	daf-12(sa204) X	otIs181[dat-1::mCherry; ttx-3::mCherry] III	vlcEx815 [osm-1::NLS::GFP; rol-6(su1006)]	25	6	CEPV	2	2
7	NFB2720	daf-12(sa204) X	otIs181[dat-1::mCherry; ttx-3::mCherry] III	vlcEx815 [osm-1::NLS::GFP; rol-6(su1006)]	25	7	CEPV	2	2
8	NFB2720	daf-12(sa204) X	otIs181[dat-1::mCherry; ttx-3::mCherry] III	vlcEx815 [osm-1::NLS::GFP; rol-6(su1006)]	25	8	CEPV	2	2
9	NFB2720	daf-12(sa204) X	otIs181[dat-1::mCherry; ttx-3::mCherry] III	vlcEx815 [osm-1::NLS::GFP; rol-6(su1006)]	25	9	CEPV	2	2
10	NFB2720	daf-12(sa204) X	otIs181[dat-1::mCherry; ttx-3::mCherry] III	vlcEx815 [osm-1::NLS::GFP; rol-6(su1006)]	25	10	CEPV	2	2
11	NFB2720	daf-12(sa204) X	otIs181[dat-1::mCherry; ttx-3::mCherry] III	vlcEx815 [osm-1::NLS::GFP; rol-6(su1006)]	25	11	CEPV	2	1
12	NFB2720	daf-12(sa204) X	otIs181[dat-1::mCherry; ttx-3::mCherry] III	vlcEx815 [osm-1::NLS::GFP; rol-6(su1006)]	25	12	CEPV	2	2
13	NFB2720	daf-12(sa204) X	otIs181[dat-1::mCherry; ttx-3::mCherry] III	vlcEx815 [osm-1::NLS::GFP; rol-6(su1006)]	25	13	CEPV	2	2
14	NFB2720	daf-12(sa204) X	otIs181[dat-1::mCherry; ttx-3::mCherry] III	vlcEx815 [osm-1::NLS::GFP; rol-6(su1006)]	25	14	CEPV	2	2
15	NFB2720	daf-12(sa204) X	otIs181[dat-1::mCherry; ttx-3::mCherry] III	vlcEx815 [osm-1::NLS::GFP; rol-6(su1006)]	25	15	CEPV	2	2
16	NFB2720	daf-12(sa204) X	otIs181[dat-1::mCherry; ttx-3::mCherry] III	vlcEx815 [osm-1::NLS::GFP; rol-6(su1006)]	25	16	CEPV	2	2
17	NFB2720	daf-12(sa204) X	otIs181[dat-1::mCherry; ttx-3::mCherry] III	vlcEx815 [osm-1::NLS::GFP; rol-6(su1006)]	25	17	CEPV	2	1
18	NFB2720	daf-12(sa204) X	otIs181[dat-1::mCherry; ttx-3::mCherry] III	vlcEx815 [osm-1::NLS::GFP; rol-6(su1006)]	25	18	CEPV	2	2
19	NFB2720	daf-12(sa204) X	otIs181[dat-1::mCherry; ttx-3::mCherry] III	vlcEx815 [osm-1::NLS::GFP; rol-6(su1006)]	25	19	CEPV	2	2
20	NFB2720	daf-12(sa204) X	otIs181[dat-1::mCherry; ttx-3::mCherry] III	vlcEx815 [osm-1::NLS::GFP; rol-6(su1006)]	25	20	CEPV	2	0
21	NFB2720	daf-12(sa204) X	otIs181[dat-1::mCherry; ttx-3::mCherry] III	vlcEx815 [osm-1::NLS::GFP; rol-6(su1006)]	25	21	CEPV	2	2
22	NFB2720	daf-12(sa204) X	otIs181[dat-1::mCherry; ttx-3::mCherry] III	vlcEx815 [osm-1::NLS::GFP; rol-6(su1006)]	25	22	CEPV	2	2
23	NFB2720	daf-12(sa204) X	otIs181[dat-1::mCherry; ttx-3::mCherry] III	vlcEx815 [osm-1::NLS::GFP; rol-6(su1006)]	25	23	CEPV	2	2
24	NFB2720	daf-12(sa204) X	otIs181[dat-1::mCherry; ttx-3::mCherry] III	vlcEx815 [osm-1::NLS::GFP; rol-6(su1006)]	25	24	CEPV	2	2
25	NFB2720	daf-12(sa204) X	otIs181[dat-1::mCherry; ttx-3::mCherry] III	vlcEx815 [osm-1::NLS::GFP; rol-6(su1006)]	25	25	CEPV	2	2
26	NFB2720	daf-12(sa204) X	otIs181[dat-1::mCherry; ttx-3::mCherry] III	vlcEx815 [osm-1::NLS::GFP; rol-6(su1006)]	25	26	CEPV	2	2
27	NFB2720	daf-12(sa204) X	otIs181[dat-1::mCherry; ttx-3::mCherry] III	vlcEx815 [osm-1::NLS::GFP; rol-6(su1006)]	25	27	CEPV	2	2
28	NFB2720	daf-12(sa204) X	otIs181[dat-1::mCherry; ttx-3::mCherry] III	vlcEx815 [osm-1::NLS::GFP; rol-6(su1006)]	25	28	CEPV	2	1
29	NFB2720	daf-12(sa204) X	otIs181[dat-1::mCherry; ttx-3::mCherry] III	vlcEx815 [osm-1::NLS::GFP; rol-6(su1006)]	25	29	CEPV	2	2
30	NFB2720	daf-12(sa204) X	otIs181[dat-1::mCherry; ttx-3::mCherry] III	vlcEx815 [osm-1::NLS::GFP; rol-6(su1006)]	25	30	CEPV	2	2
31	NFB2721	fkh-8(tm292) II; daf-12(sa204) X	otIs181[dat-1::mCherry; ttx-3::mCherry] III	vlcEx815 [osm-1::NLS::GFP; rol-6(su1006)]	25	1	CEPV	2	2
32	NFB2721	fkh-8(tm292) II; daf-12(sa204) X	otIs181[dat-1::mCherry; ttx-3::mCherry] III	vlcEx815 [osm-1::NLS::GFP; rol-6(su1006)]	25	2	CEPV	2	2
33	NFB2721	fkh-8(tm292) II; daf-12(sa204) X	otIs181[dat-1::mCherry; ttx-3::mCherry] III	vlcEx815 [osm-1::NLS::GFP; rol-6(su1006)]	25	3	CEPV	2	2
34	NFB2721	fkh-8(tm292) II; daf-12(sa204) X	otIs181[dat-1::mCherry; ttx-3::mCherry] III	vlcEx815 [osm-1::NLS::GFP; rol-6(su1006)]	25	4	CEPV	2	2
35	NFB2721	fkh-8(tm292) II; daf-12(sa204) X	otIs181[dat-1::mCherry; ttx-3::mCherry] III	vlcEx815 [osm-1::NLS::GFP; rol-6(su1006)]	25	5	CEPV	2	1
36	NFB2721	fkh-8(tm292) II; daf-12(sa204) X	otIs181[dat-1::mCherry; ttx-3::mCherry] III	vlcEx815 [osm-1::NLS::GFP; rol-6(su1006)]	25	6	CEPV	2	1
37	NFB2721	fkh-8(tm292) II; daf-12(sa204) X	otIs181[dat-1::mCherry; ttx-3::mCherry] III	vlcEx815 [osm-1::NLS::GFP; rol-6(su1006)]	25	7	CEPV	2	1
38	NFB2721	fkh-8(tm292) II; daf-12(sa204) X	otIs181[dat-1::mCherry; ttx-3::mCherry] III	vlcEx815 [osm-1::NLS::GFP; rol-6(su1006)]	25	8	CEPV	2	2
39	NFB2721	fkh-8(tm292) II; daf-12(sa204) X	otIs181[dat-1::mCherry; ttx-3::mCherry] III	vlcEx815 [osm-1::NLS::GFP; rol-6(su1006)]	25	9	CEPV	2	2
40	NFB2721	fkh-8(tm292) II; daf-12(sa204) X	otIs181[dat-1::mCherry; ttx-3::mCherry] III	vlcEx815 [osm-1::NLS::GFP; rol-6(su1006)]	25	10	CEPV	2	2
41	NFB2721	fkh-8(tm292) II; daf-12(sa204) X	otIs181[dat-1::mCherry; ttx-3::mCherry] III	vlcEx815 [osm-1::NLS::GFP; rol-6(su1006)]	25	11	CEPV	2	2
42	NFB2721	fkh-8(tm292) II; daf-12(sa204) X	otIs181[dat-1::mCherry; ttx-3::mCherry] III	vlcEx815 [osm-1::NLS::GFP; rol-6(su1006)]	25	12	CEPV	2	1
43	NFB2721	fkh-8(tm292) II; daf-12(sa204) X	otIs181[dat-1::mCherry; ttx-3::mCherry] III	vlcEx815 [osm-1::NLS::GFP; rol-6(su1006)]	25	13	CEPV	2	2
44	NFB2721	fkh-8(tm292) II; daf-12(sa204) X	otIs181[dat-1::mCherry; ttx-3::mCherry] III	vlcEx815 [osm-1::NLS::GFP; rol-6(su1006)]	25	14	CEPV	2	1
45	NFB2721	fkh-8(tm292) II; daf-12(sa204) X	otIs181[dat-1::mCherry; ttx-3::mCherry] III	vlcEx815 [osm-1::NLS::GFP; rol-6(su1006)]	25	15	CEPV	2	2
46	NFB2721	fkh-8(tm292) II; daf-12(sa204) X	otIs181[dat-1::mCherry; ttx-3::mCherry] III	vlcEx815 [osm-1::NLS::GFP; rol-6(su1006)]	25	16	CEPV	2	2
47	NFB2721	fkh-8(tm292) II; daf-12(sa204) X	otIs181[dat-1::mCherry; ttx-3::mCherry] III	vlcEx815 [osm-1::NLS::GFP; rol-6(su1006)]	25	17	CEPV	2	2
48	NFB2721	fkh-8(tm292) II; daf-12(sa204) X	otIs181[dat-1::mCherry; ttx-3::mCherry] III	vlcEx815 [osm-1::NLS::GFP; rol-6(su1006)]	25	18	CEPV	2	2
49	NFB2721	fkh-8(tm292) II; daf-12(sa204) X	otIs181[dat-1::mCherry; ttx-3::mCherry] III	vlcEx815 [osm-1::NLS::GFP; rol-6(su1006)]	25	19	CEPV	2	2
50	NFB2721	fkh-8(tm292) II; daf-12(sa204) X	otIs181[dat-1::mCherry; ttx-3::mCherry] III	vlcEx815 [osm-1::NLS::GFP; rol-6(su1006)]	25	20	CEPV	2	2
51	NFB2721	fkh-8(tm292) II; daf-12(sa204) X	otIs181[dat-1::mCherry; ttx-3::mCherry] III	vlcEx815 [osm-1::NLS::GFP; rol-6(su1006)]	25	21	CEPV	2	2
52	NFB2721	fkh-8(tm292) II; daf-12(sa204) X	otIs181[dat-1::mCherry; ttx-3::mCherry] III	vlcEx815 [osm-1::NLS::GFP; rol-6(su1006)]	25	22	CEPV	2	1
53	NFB2721	fkh-8(tm292) II; daf-12(sa204) X	otIs181[dat-1::mCherry; ttx-3::mCherry] III	vlcEx815 [osm-1::NLS::GFP; rol-6(su1006)]	25	23	CEPV	2	2
54	NFB2721	fkh-8(tm292) II; daf-12(sa204) X	otIs181[dat-1::mCherry; ttx-3::mCherry] III	vlcEx815 [osm-1::NLS::GFP; rol-6(su1006)]	25	24	CEPV	2	2
55	NFB2721	fkh-8(tm292) II; daf-12(sa204) X	otIs181[dat-1::mCherry; ttx-3::mCherry] III	vlcEx815 [osm-1::NLS::GFP; rol-6(su1006)]	25	25	CEPV	2	2
56	NFB2721	fkh-8(tm292) II; daf-12(sa204) X	otIs181[dat-1::mCherry; ttx-3::mCherry] III	vlcEx815 [osm-1::NLS::GFP; rol-6(su1006)]	25	26	CEPV	2	2
57	NFB2721	fkh-8(tm292) II; daf-12(sa204) X	otIs181[dat-1::mCherry; ttx-3::mCherry] III	vlcEx815 [osm-1::NLS::GFP; rol-6(su1006)]	25	27	CEPV	2	2
58	NFB2721	fkh-8(tm292) II; daf-12(sa204) X	otIs181[dat-1::mCherry; ttx-3::mCherry] III	vlcEx815 [osm-1::NLS::GFP; rol-6(su1006)]	25	28	CEPV	2	2
59	NFB2721	fkh-8(tm292) II; daf-12(sa204) X	otIs181[dat-1::mCherry; ttx-3::mCherry] III	vlcEx815 [osm-1::NLS::GFP; rol-6(su1006)]	25	29	CEPV	2	2
60	NFB2721	fkh-8(tm292) II; daf-12(sa204) X	otIs181[dat-1::mCherry; ttx-3::mCherry] III	vlcEx815 [osm-1::NLS::GFP; rol-6(su1006)]	25	30	CEPV	2	2
61	NFB2722	daf-19(m86); daf-12(sa204) X	otIs181[dat-1::mCherry; ttx-3::mCherry] III	vlcEx815 [osm-1::NLS::GFP; rol-6(su1006)]	25	1	CEPV	2	1
62	NFB2722	daf-19(m86); daf-12(sa204) X	otIs181[dat-1::mCherry; ttx-3::mCherry] III	vlcEx815 [osm-1::NLS::GFP; rol-6(su1006)]	25	2	CEPV	2	2
63	NFB2722	daf-19(m86); daf-12(sa204) X	otIs181[dat-1::mCherry; ttx-3::mCherry] III	vlcEx815 [osm-1::NLS::GFP; rol-6(su1006)]	25	3	CEPV	2	1
64	NFB2722	daf-19(m86); daf-12(sa204) X	otIs181[dat-1::mCherry; ttx-3::mCherry] III	vlcEx815 [osm-1::NLS::GFP; rol-6(su1006)]	25	4	CEPV	2	1
65	NFB2722	daf-19(m86); daf-12(sa204) X	otIs181[dat-1::mCherry; ttx-3::mCherry] III	vlcEx815 [osm-1::NLS::GFP; rol-6(su1006)]	25	5	CEPV	2	2
66	NFB2722	daf-19(m86); daf-12(sa204) X	otIs181[dat-1::mCherry; ttx-3::mCherry] III	vlcEx815 [osm-1::NLS::GFP; rol-6(su1006)]	25	6	CEPV	2	2
67	NFB2722	daf-19(m86); daf-12(sa204) X	otIs181[dat-1::mCherry; ttx-3::mCherry] III	vlcEx815 [osm-1::NLS::GFP; rol-6(su1006)]	25	7	CEPV	2	2
68	NFB2722	daf-19(m86); daf-12(sa204) X	otIs181[dat-1::mCherry; ttx-3::mCherry] III	vlcEx815 [osm-1::NLS::GFP; rol-6(su1006)]	25	8	CEPV	2	1
69	NFB2722	daf-19(m86); daf-12(sa204) X	otIs181[dat-1::mCherry; ttx-3::mCherry] III	vlcEx815 [osm-1::NLS::GFP; rol-6(su1006)]	25	9	CEPV	2	2
70	NFB2722	daf-19(m86); daf-12(sa204) X	otIs181[dat-1::mCherry; ttx-3::mCherry] III	vlcEx815 [osm-1::NLS::GFP; rol-6(su1006)]	25	10	CEPV	2	2
71	NFB2722	daf-19(m86); daf-12(sa204) X	otIs181[dat-1::mCherry; ttx-3::mCherry] III	vlcEx815 [osm-1::NLS::GFP; rol-6(su1006)]	25	11	CEPV	2	2
72	NFB2722	daf-19(m86); daf-12(sa204) X	otIs181[dat-1::mCherry; ttx-3::mCherry] III	vlcEx815 [osm-1::NLS::GFP; rol-6(su1006)]	25	12	CEPV	2	2
73	NFB2722	daf-19(m86); daf-12(sa204) X	otIs181[dat-1::mCherry; ttx-3::mCherry] III	vlcEx815 [osm-1::NLS::GFP; rol-6(su1006)]	25	13	CEPV	2	2
74	NFB2722	daf-19(m86); daf-12(sa204) X	otIs181[dat-1::mCherry; ttx-3::mCherry] III	vlcEx815 [osm-1::NLS::GFP; rol-6(su1006)]	25	14	CEPV	2	1
75	NFB2722	daf-19(m86); daf-12(sa204) X	otIs181[dat-1::mCherry; ttx-3::mCherry] III	vlcEx815 [osm-1::NLS::GFP; rol-6(su1006)]	25	15	CEPV	2	2
76	NFB2722	daf-19(m86); daf-12(sa204) X	otIs181[dat-1::mCherry; ttx-3::mCherry] III	vlcEx815 [osm-1::NLS::GFP; rol-6(su1006)]	25	16	CEPV	2	2
77	NFB2722	daf-19(m86); daf-12(sa204) X	otIs181[dat-1::mCherry; ttx-3::mCherry] III	vlcEx815 [osm-1::NLS::GFP; rol-6(su1006)]	25	17	CEPV	2	2
78	NFB2722	daf-19(m86); daf-12(sa204) X	otIs181[dat-1::mCherry; ttx-3::mCherry] III	vlcEx815 [osm-1::NLS::GFP; rol-6(su1006)]	25	18	CEPV	2	2
79	NFB2722	daf-19(m86); daf-12(sa204) X	otIs181[dat-1::mCherry; ttx-3::mCherry] III	vlcEx815 [osm-1::NLS::GFP; rol-6(su1006)]	25	19	CEPV	2	1
80	NFB2722	daf-19(m86); daf-12(sa204) X	otIs181[dat-1::mCherry; ttx-3::mCherry] III	vlcEx815 [osm-1::NLS::GFP; rol-6(su1006)]	25	20	CEPV	2	2
81	NFB2722	daf-19(m86); daf-12(sa204) X	otIs181[dat-1::mCherry; ttx-3::mCherry] III	vlcEx815 [osm-1::NLS::GFP; rol-6(su1006)]	25	21	CEPV	2	2
82	NFB2722	daf-19(m86); daf-12(sa204) X	otIs181[dat-1::mCherry; ttx-3::mCherry] III	vlcEx815 [osm-1::NLS::GFP; rol-6(su1006)]	25	22	CEPV	2	2
83	NFB2722	daf-19(m86); daf-12(sa204) X	otIs181[dat-1::mCherry; ttx-3::mCherry] III	vlcEx815 [osm-1::NLS::GFP; rol-6(su1006)]	25	23	CEPV	2	1
84	NFB2722	daf-19(m86); daf-12(sa204) X	otIs181[dat-1::mCherry; ttx-3::mCherry] III	vlcEx815 [osm-1::NLS::GFP; rol-6(su1006)]	25	24	CEPV	2	2
85	NFB2722	daf-19(m86); daf-12(sa204) X	otIs181[dat-1::mCherry; ttx-3::mCherry] III	vlcEx815 [osm-1::NLS::GFP; rol-6(su1006)]	25	25	CEPV	2	1
86	NFB2722	daf-19(m86); daf-12(sa204) X	otIs181[dat-1::mCherry; ttx-3::mCherry] III	vlcEx815 [osm-1::NLS::GFP; rol-6(su1006)]	25	26	CEPV	2	2
87	NFB2722	daf-19(m86); daf-12(sa204) X	otIs181[dat-1::mCherry; ttx-3::mCherry] III	vlcEx815 [osm-1::NLS::GFP; rol-6(su1006)]	25	27	CEPV	2	2
88	NFB2722	daf-19(m86); daf-12(sa204) X	otIs181[dat-1::mCherry; ttx-3::mCherry] III	vlcEx815 [osm-1::NLS::GFP; rol-6(su1006)]	25	28	CEPV	2	2
89	NFB2722	daf-19(m86); daf-12(sa204) X	otIs181[dat-1::mCherry; ttx-3::mCherry] III	vlcEx815 [osm-1::NLS::GFP; rol-6(su1006)]	25	29	CEPV	2	1
90	NFB2722	daf-19(m86); daf-12(sa204) X	otIs181[dat-1::mCherry; ttx-3::mCherry] III	vlcEx815 [osm-1::NLS::GFP; rol-6(su1006)]	25	30	CEPV	2	2
91	NFB2723	fkh-8(tm292) II; daf-19(m86); daf-12(sa204) X	otIs181[dat-1::mCherry; ttx-3::mCherry] III	vlcEx815 [osm-1::NLS::GFP; rol-6(su1006)]	25	1	CEPV	2	0
92	NFB2723	fkh-8(tm292) II; daf-19(m86); daf-12(sa204) X	otIs181[dat-1::mCherry; ttx-3::mCherry] III	vlcEx815 [osm-1::NLS::GFP; rol-6(su1006)]	25	2	CEPV	2	0
93	NFB2723	fkh-8(tm292) II; daf-19(m86); daf-12(sa204) X	otIs181[dat-1::mCherry; ttx-3::mCherry] III	vlcEx815 [osm-1::NLS::GFP; rol-6(su1006)]	25	3	CEPV	2	1
94	NFB2723	fkh-8(tm292) II; daf-19(m86); daf-12(sa204) X	otIs181[dat-1::mCherry; ttx-3::mCherry] III	vlcEx815 [osm-1::NLS::GFP; rol-6(su1006)]	25	4	CEPV	2	0
95	NFB2723	fkh-8(tm292) II; daf-19(m86); daf-12(sa204) X	otIs181[dat-1::mCherry; ttx-3::mCherry] III	vlcEx815 [osm-1::NLS::GFP; rol-6(su1006)]	25	5	CEPV	2	0
96	NFB2723	fkh-8(tm292) II; daf-19(m86); daf-12(sa204) X	otIs181[dat-1::mCherry; ttx-3::mCherry] III	vlcEx815 [osm-1::NLS::GFP; rol-6(su1006)]	25	6	CEPV	2	0
97	NFB2723	fkh-8(tm292) II; daf-19(m86); daf-12(sa204) X	otIs181[dat-1::mCherry; ttx-3::mCherry] III	vlcEx815 [osm-1::NLS::GFP; rol-6(su1006)]	25	7	CEPV	2	2
98	NFB2723	fkh-8(tm292) II; daf-19(m86); daf-12(sa204) X	otIs181[dat-1::mCherry; ttx-3::mCherry] III	vlcEx815 [osm-1::NLS::GFP; rol-6(su1006)]	25	8	CEPV	2	0
99	NFB2723	fkh-8(tm292) II; daf-19(m86); daf-12(sa204) X	otIs181[dat-1::mCherry; ttx-3::mCherry] III	vlcEx815 [osm-1::NLS::GFP; rol-6(su1006)]	25	9	CEPV	2	0
100	NFB2723	fkh-8(tm292) II; daf-19(m86); daf-12(sa204) X	otIs181[dat-1::mCherry; ttx-3::mCherry] III	vlcEx815 [osm-1::NLS::GFP; rol-6(su1006)]	25	10	CEPV	2	0
101	NFB2723	fkh-8(tm292) II; daf-19(m86); daf-12(sa204) X	otIs181[dat-1::mCherry; ttx-3::mCherry] III	vlcEx815 [osm-1::NLS::GFP; rol-6(su1006)]	25	11	CEPV	2	1
102	NFB2723	fkh-8(tm292) II; daf-19(m86); daf-12(sa204) X	otIs181[dat-1::mCherry; ttx-3::mCherry] III	vlcEx815 [osm-1::NLS::GFP; rol-6(su1006)]	25	12	CEPV	2	1
103	NFB2723	fkh-8(tm292) II; daf-19(m86); daf-12(sa204) X	otIs181[dat-1::mCherry; ttx-3::mCherry] III	vlcEx815 [osm-1::NLS::GFP; rol-6(su1006)]	25	13	CEPV	2	0
104	NFB2723	fkh-8(tm292) II; daf-19(m86); daf-12(sa204) X	otIs181[dat-1::mCherry; ttx-3::mCherry] III	vlcEx815 [osm-1::NLS::GFP; rol-6(su1006)]	25	14	CEPV	2	0
105	NFB2723	fkh-8(tm292) II; daf-19(m86); daf-12(sa204) X	otIs181[dat-1::mCherry; ttx-3::mCherry] III	vlcEx815 [osm-1::NLS::GFP; rol-6(su1006)]	25	15	CEPV	2	0
106	NFB2723	fkh-8(tm292) II; daf-19(m86); daf-12(sa204) X	otIs181[dat-1::mCherry; ttx-3::mCherry] III	vlcEx815 [osm-1::NLS::GFP; rol-6(su1006)]	25	16	CEPV	2	0
107	NFB2723	fkh-8(tm292) II; daf-19(m86); daf-12(sa204) X	otIs181[dat-1::mCherry; ttx-3::mCherry] III	vlcEx815 [osm-1::NLS::GFP; rol-6(su1006)]	25	17	CEPV	2	0
108	NFB2723	fkh-8(tm292) II; daf-19(m86); daf-12(sa204) X	otIs181[dat-1::mCherry; ttx-3::mCherry] III	vlcEx815 [osm-1::NLS::GFP; rol-6(su1006)]	25	18	CEPV	2	0
109	NFB2723	fkh-8(tm292) II; daf-19(m86); daf-12(sa204) X	otIs181[dat-1::mCherry; ttx-3::mCherry] III	vlcEx815 [osm-1::NLS::GFP; rol-6(su1006)]	25	19	CEPV	2	0
110	NFB2723	fkh-8(tm292) II; daf-19(m86); daf-12(sa204) X	otIs181[dat-1::mCherry; ttx-3::mCherry] III	vlcEx815 [osm-1::NLS::GFP; rol-6(su1006)]	25	20	CEPV	2	0
111	NFB2723	fkh-8(tm292) II; daf-19(m86); daf-12(sa204) X	otIs181[dat-1::mCherry; ttx-3::mCherry] III	vlcEx815 [osm-1::NLS::GFP; rol-6(su1006)]	25	21	CEPV	2	0
112	NFB2723	fkh-8(tm292) II; daf-19(m86); daf-12(sa204) X	otIs181[dat-1::mCherry; ttx-3::mCherry] III	vlcEx815 [osm-1::NLS::GFP; rol-6(su1006)]	25	22	CEPV	2	0
113	NFB2723	fkh-8(tm292) II; daf-19(m86); daf-12(sa204) X	otIs181[dat-1::mCherry; ttx-3::mCherry] III	vlcEx815 [osm-1::NLS::GFP; rol-6(su1006)]	25	23	CEPV	2	0
114	NFB2723	fkh-8(tm292) II; daf-19(m86); daf-12(sa204) X	otIs181[dat-1::mCherry; ttx-3::mCherry] III	vlcEx815 [osm-1::NLS::GFP; rol-6(su1006)]	25	24	CEPV	2	0
115	NFB2723	fkh-8(tm292) II; daf-19(m86); daf-12(sa204) X	otIs181[dat-1::mCherry; ttx-3::mCherry] III	vlcEx815 [osm-1::NLS::GFP; rol-6(su1006)]	25	25	CEPV	2	0
116	NFB2723	fkh-8(tm292) II; daf-19(m86); daf-12(sa204) X	otIs181[dat-1::mCherry; ttx-3::mCherry] III	vlcEx815 [osm-1::NLS::GFP; rol-6(su1006)]	25	26	CEPV	2	1
117	NFB2723	fkh-8(tm292) II; daf-19(m86); daf-12(sa204) X	otIs181[dat-1::mCherry; ttx-3::mCherry] III	vlcEx815 [osm-1::NLS::GFP; rol-6(su1006)]	25	27	CEPV	2	0
118	NFB2723	fkh-8(tm292) II; daf-19(m86); daf-12(sa204) X	otIs181[dat-1::mCherry; ttx-3::mCherry] III	vlcEx815 [osm-1::NLS::GFP; rol-6(su1006)]	25	28	CEPV	2	0
119	NFB2723	fkh-8(tm292) II; daf-19(m86); daf-12(sa204) X	otIs181[dat-1::mCherry; ttx-3::mCherry] III	vlcEx815 [osm-1::NLS::GFP; rol-6(su1006)]	25	29	CEPV	2	0
120	NFB2723	fkh-8(tm292) II; daf-19(m86); daf-12(sa204) X	otIs181[dat-1::mCherry; ttx-3::mCherry] III	vlcEx815 [osm-1::NLS::GFP; rol-6(su1006)]	25	30	CEPV	2	0
121	NFB2720	daf-12(sa204) X	otIs181[dat-1::mCherry; ttx-3::mCherry] III	vlcEx815 [osm-1::NLS::GFP; rol-6(su1006)]	25	1	CEPD	2	2
122	NFB2720	daf-12(sa204) X	otIs181[dat-1::mCherry; ttx-3::mCherry] III	vlcEx815 [osm-1::NLS::GFP; rol-6(su1006)]	25	2	CEPD	2	2
123	NFB2720	daf-12(sa204) X	otIs181[dat-1::mCherry; ttx-3::mCherry] III	vlcEx815 [osm-1::NLS::GFP; rol-6(su1006)]	25	3	CEPD	2	2
124	NFB2720	daf-12(sa204) X	otIs181[dat-1::mCherry; ttx-3::mCherry] III	vlcEx815 [osm-1::NLS::GFP; rol-6(su1006)]	25	4	CEPD	2	2
125	NFB2720	daf-12(sa204) X	otIs181[dat-1::mCherry; ttx-3::mCherry] III	vlcEx815 [osm-1::NLS::GFP; rol-6(su1006)]	25	5	CEPD	2	2
126	NFB2720	daf-12(sa204) X	otIs181[dat-1::mCherry; ttx-3::mCherry] III	vlcEx815 [osm-1::NLS::GFP; rol-6(su1006)]	25	6	CEPD	2	2
127	NFB2720	daf-12(sa204) X	otIs181[dat-1::mCherry; ttx-3::mCherry] III	vlcEx815 [osm-1::NLS::GFP; rol-6(su1006)]	25	7	CEPD	2	2
128	NFB2720	daf-12(sa204) X	otIs181[dat-1::mCherry; ttx-3::mCherry] III	vlcEx815 [osm-1::NLS::GFP; rol-6(su1006)]	25	8	CEPD	2	2
129	NFB2720	daf-12(sa204) X	otIs181[dat-1::mCherry; ttx-3::mCherry] III	vlcEx815 [osm-1::NLS::GFP; rol-6(su1006)]	25	9	CEPD	2	2
130	NFB2720	daf-12(sa204) X	otIs181[dat-1::mCherry; ttx-3::mCherry] III	vlcEx815 [osm-1::NLS::GFP; rol-6(su1006)]	25	10	CEPD	2	2
131	NFB2720	daf-12(sa204) X	otIs181[dat-1::mCherry; ttx-3::mCherry] III	vlcEx815 [osm-1::NLS::GFP; rol-6(su1006)]	25	11	CEPD	2	2
132	NFB2720	daf-12(sa204) X	otIs181[dat-1::mCherry; ttx-3::mCherry] III	vlcEx815 [osm-1::NLS::GFP; rol-6(su1006)]	25	12	CEPD	2	2
133	NFB2720	daf-12(sa204) X	otIs181[dat-1::mCherry; ttx-3::mCherry] III	vlcEx815 [osm-1::NLS::GFP; rol-6(su1006)]	25	13	CEPD	2	2
134	NFB2720	daf-12(sa204) X	otIs181[dat-1::mCherry; ttx-3::mCherry] III	vlcEx815 [osm-1::NLS::GFP; rol-6(su1006)]	25	14	CEPD	2	2
135	NFB2720	daf-12(sa204) X	otIs181[dat-1::mCherry; ttx-3::mCherry] III	vlcEx815 [osm-1::NLS::GFP; rol-6(su1006)]	25	15	CEPD	2	2
136	NFB2720	daf-12(sa204) X	otIs181[dat-1::mCherry; ttx-3::mCherry] III	vlcEx815 [osm-1::NLS::GFP; rol-6(su1006)]	25	16	CEPD	2	1
137	NFB2720	daf-12(sa204) X	otIs181[dat-1::mCherry; ttx-3::mCherry] III	vlcEx815 [osm-1::NLS::GFP; rol-6(su1006)]	25	17	CEPD	2	1
138	NFB2720	daf-12(sa204) X	otIs181[dat-1::mCherry; ttx-3::mCherry] III	vlcEx815 [osm-1::NLS::GFP; rol-6(su1006)]	25	18	CEPD	2	2
139	NFB2720	daf-12(sa204) X	otIs181[dat-1::mCherry; ttx-3::mCherry] III	vlcEx815 [osm-1::NLS::GFP; rol-6(su1006)]	25	19	CEPD	2	2
140	NFB2720	daf-12(sa204) X	otIs181[dat-1::mCherry; ttx-3::mCherry] III	vlcEx815 [osm-1::NLS::GFP; rol-6(su1006)]	25	20	CEPD	2	2
141	NFB2720	daf-12(sa204) X	otIs181[dat-1::mCherry; ttx-3::mCherry] III	vlcEx815 [osm-1::NLS::GFP; rol-6(su1006)]	25	21	CEPD	2	2
142	NFB2720	daf-12(sa204) X	otIs181[dat-1::mCherry; ttx-3::mCherry] III	vlcEx815 [osm-1::NLS::GFP; rol-6(su1006)]	25	22	CEPD	2	2
143	NFB2720	daf-12(sa204) X	otIs181[dat-1::mCherry; ttx-3::mCherry] III	vlcEx815 [osm-1::NLS::GFP; rol-6(su1006)]	25	23	CEPD	2	2
144	NFB2720	daf-12(sa204) X	otIs181[dat-1::mCherry; ttx-3::mCherry] III	vlcEx815 [osm-1::NLS::GFP; rol-6(su1006)]	25	24	CEPD	2	2
145	NFB2720	daf-12(sa204) X	otIs181[dat-1::mCherry; ttx-3::mCherry] III	vlcEx815 [osm-1::NLS::GFP; rol-6(su1006)]	25	25	CEPD	2	1
146	NFB2720	daf-12(sa204) X	otIs181[dat-1::mCherry; ttx-3::mCherry] III	vlcEx815 [osm-1::NLS::GFP; rol-6(su1006)]	25	26	CEPD	2	2
147	NFB2720	daf-12(sa204) X	otIs181[dat-1::mCherry; ttx-3::mCherry] III	vlcEx815 [osm-1::NLS::GFP; rol-6(su1006)]	25	27	CEPD	2	2
148	NFB2720	daf-12(sa204) X	otIs181[dat-1::mCherry; ttx-3::mCherry] III	vlcEx815 [osm-1::NLS::GFP; rol-6(su1006)]	25	28	CEPD	2	2
149	NFB2720	daf-12(sa204) X	otIs181[dat-1::mCherry; ttx-3::mCherry] III	vlcEx815 [osm-1::NLS::GFP; rol-6(su1006)]	25	29	CEPD	2	2
150	NFB2720	daf-12(sa204) X	otIs181[dat-1::mCherry; ttx-3::mCherry] III	vlcEx815 [osm-1::NLS::GFP; rol-6(su1006)]	25	30	CEPD	2	2
151	NFB2721	fkh-8(tm292) II; daf-12(sa204) X	otIs181[dat-1::mCherry; ttx-3::mCherry] III	vlcEx815 [osm-1::NLS::GFP; rol-6(su1006)]	25	1	CEPD	2	2
152	NFB2721	fkh-8(tm292) II; daf-12(sa204) X	otIs181[dat-1::mCherry; ttx-3::mCherry] III	vlcEx815 [osm-1::NLS::GFP; rol-6(su1006)]	25	2	CEPD	2	2
153	NFB2721	fkh-8(tm292) II; daf-12(sa204) X	otIs181[dat-1::mCherry; ttx-3::mCherry] III	vlcEx815 [osm-1::NLS::GFP; rol-6(su1006)]	25	3	CEPD	2	2
154	NFB2721	fkh-8(tm292) II; daf-12(sa204) X	otIs181[dat-1::mCherry; ttx-3::mCherry] III	vlcEx815 [osm-1::NLS::GFP; rol-6(su1006)]	25	4	CEPD	2	2
155	NFB2721	fkh-8(tm292) II; daf-12(sa204) X	otIs181[dat-1::mCherry; ttx-3::mCherry] III	vlcEx815 [osm-1::NLS::GFP; rol-6(su1006)]	25	5	CEPD	2	1
156	NFB2721	fkh-8(tm292) II; daf-12(sa204) X	otIs181[dat-1::mCherry; ttx-3::mCherry] III	vlcEx815 [osm-1::NLS::GFP; rol-6(su1006)]	25	6	CEPD	2	0
157	NFB2721	fkh-8(tm292) II; daf-12(sa204) X	otIs181[dat-1::mCherry; ttx-3::mCherry] III	vlcEx815 [osm-1::NLS::GFP; rol-6(su1006)]	25	7	CEPD	2	2
158	NFB2721	fkh-8(tm292) II; daf-12(sa204) X	otIs181[dat-1::mCherry; ttx-3::mCherry] III	vlcEx815 [osm-1::NLS::GFP; rol-6(su1006)]	25	8	CEPD	2	2
159	NFB2721	fkh-8(tm292) II; daf-12(sa204) X	otIs181[dat-1::mCherry; ttx-3::mCherry] III	vlcEx815 [osm-1::NLS::GFP; rol-6(su1006)]	25	9	CEPD	2	2
160	NFB2721	fkh-8(tm292) II; daf-12(sa204) X	otIs181[dat-1::mCherry; ttx-3::mCherry] III	vlcEx815 [osm-1::NLS::GFP; rol-6(su1006)]	25	10	CEPD	2	2
161	NFB2721	fkh-8(tm292) II; daf-12(sa204) X	otIs181[dat-1::mCherry; ttx-3::mCherry] III	vlcEx815 [osm-1::NLS::GFP; rol-6(su1006)]	25	11	CEPD	2	2
162	NFB2721	fkh-8(tm292) II; daf-12(sa204) X	otIs181[dat-1::mCherry; ttx-3::mCherry] III	vlcEx815 [osm-1::NLS::GFP; rol-6(su1006)]	25	12	CEPD	2	0
163	NFB2721	fkh-8(tm292) II; daf-12(sa204) X	otIs181[dat-1::mCherry; ttx-3::mCherry] III	vlcEx815 [osm-1::NLS::GFP; rol-6(su1006)]	25	13	CEPD	2	1
164	NFB2721	fkh-8(tm292) II; daf-12(sa204) X	otIs181[dat-1::mCherry; ttx-3::mCherry] III	vlcEx815 [osm-1::NLS::GFP; rol-6(su1006)]	25	14	CEPD	2	2
165	NFB2721	fkh-8(tm292) II; daf-12(sa204) X	otIs181[dat-1::mCherry; ttx-3::mCherry] III	vlcEx815 [osm-1::NLS::GFP; rol-6(su1006)]	25	15	CEPD	2	2
166	NFB2721	fkh-8(tm292) II; daf-12(sa204) X	otIs181[dat-1::mCherry; ttx-3::mCherry] III	vlcEx815 [osm-1::NLS::GFP; rol-6(su1006)]	25	16	CEPD	2	1
167	NFB2721	fkh-8(tm292) II; daf-12(sa204) X	otIs181[dat-1::mCherry; ttx-3::mCherry] III	vlcEx815 [osm-1::NLS::GFP; rol-6(su1006)]	25	17	CEPD	2	2
168	NFB2721	fkh-8(tm292) II; daf-12(sa204) X	otIs181[dat-1::mCherry; ttx-3::mCherry] III	vlcEx815 [osm-1::NLS::GFP; rol-6(su1006)]	25	18	CEPD	2	2
169	NFB2721	fkh-8(tm292) II; daf-12(sa204) X	otIs181[dat-1::mCherry; ttx-3::mCherry] III	vlcEx815 [osm-1::NLS::GFP; rol-6(su1006)]	25	19	CEPD	2	2
170	NFB2721	fkh-8(tm292) II; daf-12(sa204) X	otIs181[dat-1::mCherry; ttx-3::mCherry] III	vlcEx815 [osm-1::NLS::GFP; rol-6(su1006)]	25	20	CEPD	2	2
171	NFB2721	fkh-8(tm292) II; daf-12(sa204) X	otIs181[dat-1::mCherry; ttx-3::mCherry] III	vlcEx815 [osm-1::NLS::GFP; rol-6(su1006)]	25	21	CEPD	2	2
172	NFB2721	fkh-8(tm292) II; daf-12(sa204) X	otIs181[dat-1::mCherry; ttx-3::mCherry] III	vlcEx815 [osm-1::NLS::GFP; rol-6(su1006)]	25	22	CEPD	2	2
173	NFB2721	fkh-8(tm292) II; daf-12(sa204) X	otIs181[dat-1::mCherry; ttx-3::mCherry] III	vlcEx815 [osm-1::NLS::GFP; rol-6(su1006)]	25	23	CEPD	2	2
174	NFB2721	fkh-8(tm292) II; daf-12(sa204) X	otIs181[dat-1::mCherry; ttx-3::mCherry] III	vlcEx815 [osm-1::NLS::GFP; rol-6(su1006)]	25	24	CEPD	2	2
175	NFB2721	fkh-8(tm292) II; daf-12(sa204) X	otIs181[dat-1::mCherry; ttx-3::mCherry] III	vlcEx815 [osm-1::NLS::GFP; rol-6(su1006)]	25	25	CEPD	2	2
176	NFB2721	fkh-8(tm292) II; daf-12(sa204) X	otIs181[dat-1::mCherry; ttx-3::mCherry] III	vlcEx815 [osm-1::NLS::GFP; rol-6(su1006)]	25	26	CEPD	2	2
177	NFB2721	fkh-8(tm292) II; daf-12(sa204) X	otIs181[dat-1::mCherry; ttx-3::mCherry] III	vlcEx815 [osm-1::NLS::GFP; rol-6(su1006)]	25	27	CEPD	2	2
178	NFB2721	fkh-8(tm292) II; daf-12(sa204) X	otIs181[dat-1::mCherry; ttx-3::mCherry] III	vlcEx815 [osm-1::NLS::GFP; rol-6(su1006)]	25	28	CEPD	2	1
179	NFB2721	fkh-8(tm292) II; daf-12(sa204) X	otIs181[dat-1::mCherry; ttx-3::mCherry] III	vlcEx815 [osm-1::NLS::GFP; rol-6(su1006)]	25	29	CEPD	2	2
180	NFB2721	fkh-8(tm292) II; daf-12(sa204) X	otIs181[dat-1::mCherry; ttx-3::mCherry] III	vlcEx815 [osm-1::NLS::GFP; rol-6(su1006)]	25	30	CEPD	2	1
181	NFB2722	daf-19(m86); daf-12(sa204) X	otIs181[dat-1::mCherry; ttx-3::mCherry] III	vlcEx815 [osm-1::NLS::GFP; rol-6(su1006)]	25	1	CEPD	2	1
182	NFB2722	daf-19(m86); daf-12(sa204) X	otIs181[dat-1::mCherry; ttx-3::mCherry] III	vlcEx815 [osm-1::NLS::GFP; rol-6(su1006)]	25	2	CEPD	2	2
183	NFB2722	daf-19(m86); daf-12(sa204) X	otIs181[dat-1::mCherry; ttx-3::mCherry] III	vlcEx815 [osm-1::NLS::GFP; rol-6(su1006)]	25	3	CEPD	2	1
184	NFB2722	daf-19(m86); daf-12(sa204) X	otIs181[dat-1::mCherry; ttx-3::mCherry] III	vlcEx815 [osm-1::NLS::GFP; rol-6(su1006)]	25	4	CEPD	2	0
185	NFB2722	daf-19(m86); daf-12(sa204) X	otIs181[dat-1::mCherry; ttx-3::mCherry] III	vlcEx815 [osm-1::NLS::GFP; rol-6(su1006)]	25	5	CEPD	2	2
186	NFB2722	daf-19(m86); daf-12(sa204) X	otIs181[dat-1::mCherry; ttx-3::mCherry] III	vlcEx815 [osm-1::NLS::GFP; rol-6(su1006)]	25	6	CEPD	2	2
187	NFB2722	daf-19(m86); daf-12(sa204) X	otIs181[dat-1::mCherry; ttx-3::mCherry] III	vlcEx815 [osm-1::NLS::GFP; rol-6(su1006)]	25	7	CEPD	2	1
188	NFB2722	daf-19(m86); daf-12(sa204) X	otIs181[dat-1::mCherry; ttx-3::mCherry] III	vlcEx815 [osm-1::NLS::GFP; rol-6(su1006)]	25	8	CEPD	2	1
189	NFB2722	daf-19(m86); daf-12(sa204) X	otIs181[dat-1::mCherry; ttx-3::mCherry] III	vlcEx815 [osm-1::NLS::GFP; rol-6(su1006)]	25	9	CEPD	2	1
190	NFB2722	daf-19(m86); daf-12(sa204) X	otIs181[dat-1::mCherry; ttx-3::mCherry] III	vlcEx815 [osm-1::NLS::GFP; rol-6(su1006)]	25	10	CEPD	2	1
191	NFB2722	daf-19(m86); daf-12(sa204) X	otIs181[dat-1::mCherry; ttx-3::mCherry] III	vlcEx815 [osm-1::NLS::GFP; rol-6(su1006)]	25	11	CEPD	2	2
192	NFB2722	daf-19(m86); daf-12(sa204) X	otIs181[dat-1::mCherry; ttx-3::mCherry] III	vlcEx815 [osm-1::NLS::GFP; rol-6(su1006)]	25	12	CEPD	2	2
193	NFB2722	daf-19(m86); daf-12(sa204) X	otIs181[dat-1::mCherry; ttx-3::mCherry] III	vlcEx815 [osm-1::NLS::GFP; rol-6(su1006)]	25	13	CEPD	2	2
194	NFB2722	daf-19(m86); daf-12(sa204) X	otIs181[dat-1::mCherry; ttx-3::mCherry] III	vlcEx815 [osm-1::NLS::GFP; rol-6(su1006)]	25	14	CEPD	2	2
195	NFB2722	daf-19(m86); daf-12(sa204) X	otIs181[dat-1::mCherry; ttx-3::mCherry] III	vlcEx815 [osm-1::NLS::GFP; rol-6(su1006)]	25	15	CEPD	2	2
196	NFB2722	daf-19(m86); daf-12(sa204) X	otIs181[dat-1::mCherry; ttx-3::mCherry] III	vlcEx815 [osm-1::NLS::GFP; rol-6(su1006)]	25	16	CEPD	2	2
197	NFB2722	daf-19(m86); daf-12(sa204) X	otIs181[dat-1::mCherry; ttx-3::mCherry] III	vlcEx815 [osm-1::NLS::GFP; rol-6(su1006)]	25	17	CEPD	2	2
198	NFB2722	daf-19(m86); daf-12(sa204) X	otIs181[dat-1::mCherry; ttx-3::mCherry] III	vlcEx815 [osm-1::NLS::GFP; rol-6(su1006)]	25	18	CEPD	2	2
199	NFB2722	daf-19(m86); daf-12(sa204) X	otIs181[dat-1::mCherry; ttx-3::mCherry] III	vlcEx815 [osm-1::NLS::GFP; rol-6(su1006)]	25	19	CEPD	2	0
200	NFB2722	daf-19(m86); daf-12(sa204) X	otIs181[dat-1::mCherry; ttx-3::mCherry] III	vlcEx815 [osm-1::NLS::GFP; rol-6(su1006)]	25	20	CEPD	2	2
201	NFB2722	daf-19(m86); daf-12(sa204) X	otIs181[dat-1::mCherry; ttx-3::mCherry] III	vlcEx815 [osm-1::NLS::GFP; rol-6(su1006)]	25	21	CEPD	2	2
202	NFB2722	daf-19(m86); daf-12(sa204) X	otIs181[dat-1::mCherry; ttx-3::mCherry] III	vlcEx815 [osm-1::NLS::GFP; rol-6(su1006)]	25	22	CEPD	2	2
203	NFB2722	daf-19(m86); daf-12(sa204) X	otIs181[dat-1::mCherry; ttx-3::mCherry] III	vlcEx815 [osm-1::NLS::GFP; rol-6(su1006)]	25	23	CEPD	2	2
204	NFB2722	daf-19(m86); daf-12(sa204) X	otIs181[dat-1::mCherry; ttx-3::mCherry] III	vlcEx815 [osm-1::NLS::GFP; rol-6(su1006)]	25	24	CEPD	2	1
205	NFB2722	daf-19(m86); daf-12(sa204) X	otIs181[dat-1::mCherry; ttx-3::mCherry] III	vlcEx815 [osm-1::NLS::GFP; rol-6(su1006)]	25	25	CEPD	2	1
206	NFB2722	daf-19(m86); daf-12(sa204) X	otIs181[dat-1::mCherry; ttx-3::mCherry] III	vlcEx815 [osm-1::NLS::GFP; rol-6(su1006)]	25	26	CEPD	2	2
207	NFB2722	daf-19(m86); daf-12(sa204) X	otIs181[dat-1::mCherry; ttx-3::mCherry] III	vlcEx815 [osm-1::NLS::GFP; rol-6(su1006)]	25	27	CEPD	2	2
208	NFB2722	daf-19(m86); daf-12(sa204) X	otIs181[dat-1::mCherry; ttx-3::mCherry] III	vlcEx815 [osm-1::NLS::GFP; rol-6(su1006)]	25	28	CEPD	2	2
209	NFB2722	daf-19(m86); daf-12(sa204) X	otIs181[dat-1::mCherry; ttx-3::mCherry] III	vlcEx815 [osm-1::NLS::GFP; rol-6(su1006)]	25	29	CEPD	2	2
210	NFB2722	daf-19(m86); daf-12(sa204) X	otIs181[dat-1::mCherry; ttx-3::mCherry] III	vlcEx815 [osm-1::NLS::GFP; rol-6(su1006)]	25	30	CEPD	2	2
211	NFB2723	fkh-8(tm292) II; daf-19(m86); daf-12(sa204) X	otIs181[dat-1::mCherry; ttx-3::mCherry] III	vlcEx815 [osm-1::NLS::GFP; rol-6(su1006)]	25	1	CEPD	2	0
212	NFB2723	fkh-8(tm292) II; daf-19(m86); daf-12(sa204) X	otIs181[dat-1::mCherry; ttx-3::mCherry] III	vlcEx815 [osm-1::NLS::GFP; rol-6(su1006)]	25	2	CEPD	2	0
213	NFB2723	fkh-8(tm292) II; daf-19(m86); daf-12(sa204) X	otIs181[dat-1::mCherry; ttx-3::mCherry] III	vlcEx815 [osm-1::NLS::GFP; rol-6(su1006)]	25	3	CEPD	2	0
214	NFB2723	fkh-8(tm292) II; daf-19(m86); daf-12(sa204) X	otIs181[dat-1::mCherry; ttx-3::mCherry] III	vlcEx815 [osm-1::NLS::GFP; rol-6(su1006)]	25	4	CEPD	2	0
215	NFB2723	fkh-8(tm292) II; daf-19(m86); daf-12(sa204) X	otIs181[dat-1::mCherry; ttx-3::mCherry] III	vlcEx815 [osm-1::NLS::GFP; rol-6(su1006)]	25	5	CEPD	2	0
216	NFB2723	fkh-8(tm292) II; daf-19(m86); daf-12(sa204) X	otIs181[dat-1::mCherry; ttx-3::mCherry] III	vlcEx815 [osm-1::NLS::GFP; rol-6(su1006)]	25	6	CEPD	2	0
217	NFB2723	fkh-8(tm292) II; daf-19(m86); daf-12(sa204) X	otIs181[dat-1::mCherry; ttx-3::mCherry] III	vlcEx815 [osm-1::NLS::GFP; rol-6(su1006)]	25	7	CEPD	2	0
218	NFB2723	fkh-8(tm292) II; daf-19(m86); daf-12(sa204) X	otIs181[dat-1::mCherry; ttx-3::mCherry] III	vlcEx815 [osm-1::NLS::GFP; rol-6(su1006)]	25	8	CEPD	2	1
219	NFB2723	fkh-8(tm292) II; daf-19(m86); daf-12(sa204) X	otIs181[dat-1::mCherry; ttx-3::mCherry] III	vlcEx815 [osm-1::NLS::GFP; rol-6(su1006)]	25	9	CEPD	2	0
220	NFB2723	fkh-8(tm292) II; daf-19(m86); daf-12(sa204) X	otIs181[dat-1::mCherry; ttx-3::mCherry] III	vlcEx815 [osm-1::NLS::GFP; rol-6(su1006)]	25	10	CEPD	2	0
221	NFB2723	fkh-8(tm292) II; daf-19(m86); daf-12(sa204) X	otIs181[dat-1::mCherry; ttx-3::mCherry] III	vlcEx815 [osm-1::NLS::GFP; rol-6(su1006)]	25	11	CEPD	2	0
222	NFB2723	fkh-8(tm292) II; daf-19(m86); daf-12(sa204) X	otIs181[dat-1::mCherry; ttx-3::mCherry] III	vlcEx815 [osm-1::NLS::GFP; rol-6(su1006)]	25	12	CEPD	2	0
223	NFB2723	fkh-8(tm292) II; daf-19(m86); daf-12(sa204) X	otIs181[dat-1::mCherry; ttx-3::mCherry] III	vlcEx815 [osm-1::NLS::GFP; rol-6(su1006)]	25	13	CEPD	2	0
224	NFB2723	fkh-8(tm292) II; daf-19(m86); daf-12(sa204) X	otIs181[dat-1::mCherry; ttx-3::mCherry] III	vlcEx815 [osm-1::NLS::GFP; rol-6(su1006)]	25	14	CEPD	2	0
225	NFB2723	fkh-8(tm292) II; daf-19(m86); daf-12(sa204) X	otIs181[dat-1::mCherry; ttx-3::mCherry] III	vlcEx815 [osm-1::NLS::GFP; rol-6(su1006)]	25	15	CEPD	2	0
226	NFB2723	fkh-8(tm292) II; daf-19(m86); daf-12(sa204) X	otIs181[dat-1::mCherry; ttx-3::mCherry] III	vlcEx815 [osm-1::NLS::GFP; rol-6(su1006)]	25	16	CEPD	2	0
227	NFB2723	fkh-8(tm292) II; daf-19(m86); daf-12(sa204) X	otIs181[dat-1::mCherry; ttx-3::mCherry] III	vlcEx815 [osm-1::NLS::GFP; rol-6(su1006)]	25	17	CEPD	2	0
228	NFB2723	fkh-8(tm292) II; daf-19(m86); daf-12(sa204) X	otIs181[dat-1::mCherry; ttx-3::mCherry] III	vlcEx815 [osm-1::NLS::GFP; rol-6(su1006)]	25	18	CEPD	2	0
229	NFB2723	fkh-8(tm292) II; daf-19(m86); daf-12(sa204) X	otIs181[dat-1::mCherry; ttx-3::mCherry] III	vlcEx815 [osm-1::NLS::GFP; rol-6(su1006)]	25	19	CEPD	2	0
230	NFB2723	fkh-8(tm292) II; daf-19(m86); daf-12(sa204) X	otIs181[dat-1::mCherry; ttx-3::mCherry] III	vlcEx815 [osm-1::NLS::GFP; rol-6(su1006)]	25	20	CEPD	2	0
231	NFB2723	fkh-8(tm292) II; daf-19(m86); daf-12(sa204) X	otIs181[dat-1::mCherry; ttx-3::mCherry] III	vlcEx815 [osm-1::NLS::GFP; rol-6(su1006)]	25	21	CEPD	2	0
232	NFB2723	fkh-8(tm292) II; daf-19(m86); daf-12(sa204) X	otIs181[dat-1::mCherry; ttx-3::mCherry] III	vlcEx815 [osm-1::NLS::GFP; rol-6(su1006)]	25	22	CEPD	2	0
233	NFB2723	fkh-8(tm292) II; daf-19(m86); daf-12(sa204) X	otIs181[dat-1::mCherry; ttx-3::mCherry] III	vlcEx815 [osm-1::NLS::GFP; rol-6(su1006)]	25	23	CEPD	2	0
234	NFB2723	fkh-8(tm292) II; daf-19(m86); daf-12(sa204) X	otIs181[dat-1::mCherry; ttx-3::mCherry] III	vlcEx815 [osm-1::NLS::GFP; rol-6(su1006)]	25	24	CEPD	2	0
235	NFB2723	fkh-8(tm292) II; daf-19(m86); daf-12(sa204) X	otIs181[dat-1::mCherry; ttx-3::mCherry] III	vlcEx815 [osm-1::NLS::GFP; rol-6(su1006)]	25	25	CEPD	2	0
236	NFB2723	fkh-8(tm292) II; daf-19(m86); daf-12(sa204) X	otIs181[dat-1::mCherry; ttx-3::mCherry] III	vlcEx815 [osm-1::NLS::GFP; rol-6(su1006)]	25	26	CEPD	2	0
237	NFB2723	fkh-8(tm292) II; daf-19(m86); daf-12(sa204) X	otIs181[dat-1::mCherry; ttx-3::mCherry] III	vlcEx815 [osm-1::NLS::GFP; rol-6(su1006)]	25	27	CEPD	2	0
238	NFB2723	fkh-8(tm292) II; daf-19(m86); daf-12(sa204) X	otIs181[dat-1::mCherry; ttx-3::mCherry] III	vlcEx815 [osm-1::NLS::GFP; rol-6(su1006)]	25	28	CEPD	2	0
239	NFB2723	fkh-8(tm292) II; daf-19(m86); daf-12(sa204) X	otIs181[dat-1::mCherry; ttx-3::mCherry] III	vlcEx815 [osm-1::NLS::GFP; rol-6(su1006)]	25	29	CEPD	2	0
240	NFB2723	fkh-8(tm292) II; daf-19(m86); daf-12(sa204) X	otIs181[dat-1::mCherry; ttx-3::mCherry] III	vlcEx815 [osm-1::NLS::GFP; rol-6(su1006)]	25	30	CEPD	2	0
241	NFB2728	daf-12(sa204) X	vlcEx1365[srh-211::tagRFP, elt-2::GFP]	vlcEx822 [xbx-1::NLS::GFP; rol-6(su1006]	25	1	PHA	1	1
242	NFB2728	daf-12(sa204) X	vlcEx1365[srh-211::tagRFP, elt-2::GFP]	vlcEx822 [xbx-1::NLS::GFP; rol-6(su1006]	25	2	PHA	2	2
243	NFB2728	daf-12(sa204) X	vlcEx1365[srh-211::tagRFP, elt-2::GFP]	vlcEx822 [xbx-1::NLS::GFP; rol-6(su1006]	25	3	PHA	2	2
244	NFB2728	daf-12(sa204) X	vlcEx1365[srh-211::tagRFP, elt-2::GFP]	vlcEx822 [xbx-1::NLS::GFP; rol-6(su1006]	25	4	PHA	2	1
245	NFB2728	daf-12(sa204) X	vlcEx1365[srh-211::tagRFP, elt-2::GFP]	vlcEx822 [xbx-1::NLS::GFP; rol-6(su1006]	25	5	PHA	2	2
246	NFB2728	daf-12(sa204) X	vlcEx1365[srh-211::tagRFP, elt-2::GFP]	vlcEx822 [xbx-1::NLS::GFP; rol-6(su1006]	25	6	PHA	2	2
247	NFB2728	daf-12(sa204) X	vlcEx1365[srh-211::tagRFP, elt-2::GFP]	vlcEx822 [xbx-1::NLS::GFP; rol-6(su1006]	25	7	PHA	2	1
248	NFB2728	daf-12(sa204) X	vlcEx1365[srh-211::tagRFP, elt-2::GFP]	vlcEx822 [xbx-1::NLS::GFP; rol-6(su1006]	25	8	PHA	2	1
249	NFB2728	daf-12(sa204) X	vlcEx1365[srh-211::tagRFP, elt-2::GFP]	vlcEx822 [xbx-1::NLS::GFP; rol-6(su1006]	25	9	PHA	2	2
250	NFB2728	daf-12(sa204) X	vlcEx1365[srh-211::tagRFP, elt-2::GFP]	vlcEx822 [xbx-1::NLS::GFP; rol-6(su1006]	25	10	PHA	2	2
251	NFB2728	daf-12(sa204) X	vlcEx1365[srh-211::tagRFP, elt-2::GFP]	vlcEx822 [xbx-1::NLS::GFP; rol-6(su1006]	25	11	PHA	2	0
252	NFB2728	daf-12(sa204) X	vlcEx1365[srh-211::tagRFP, elt-2::GFP]	vlcEx822 [xbx-1::NLS::GFP; rol-6(su1006]	25	12	PHA	1	0
253	NFB2728	daf-12(sa204) X	vlcEx1365[srh-211::tagRFP, elt-2::GFP]	vlcEx822 [xbx-1::NLS::GFP; rol-6(su1006]	25	13	PHA	2	0
254	NFB2728	daf-12(sa204) X	vlcEx1365[srh-211::tagRFP, elt-2::GFP]	vlcEx822 [xbx-1::NLS::GFP; rol-6(su1006]	25	14	PHA	2	2
255	NFB2728	daf-12(sa204) X	vlcEx1365[srh-211::tagRFP, elt-2::GFP]	vlcEx822 [xbx-1::NLS::GFP; rol-6(su1006]	25	15	PHA	2	2
256	NFB2728	daf-12(sa204) X	vlcEx1365[srh-211::tagRFP, elt-2::GFP]	vlcEx822 [xbx-1::NLS::GFP; rol-6(su1006]	25	16	PHA	2	2
257	NFB2728	daf-12(sa204) X	vlcEx1365[srh-211::tagRFP, elt-2::GFP]	vlcEx822 [xbx-1::NLS::GFP; rol-6(su1006]	25	17	PHA	2	0
258	NFB2728	daf-12(sa204) X	vlcEx1365[srh-211::tagRFP, elt-2::GFP]	vlcEx822 [xbx-1::NLS::GFP; rol-6(su1006]	25	18	PHA	1	1
259	NFB2728	daf-12(sa204) X	vlcEx1365[srh-211::tagRFP, elt-2::GFP]	vlcEx822 [xbx-1::NLS::GFP; rol-6(su1006]	25	19	PHA	2	2
260	NFB2728	daf-12(sa204) X	vlcEx1365[srh-211::tagRFP, elt-2::GFP]	vlcEx822 [xbx-1::NLS::GFP; rol-6(su1006]	25	20	PHA	2	2
261	NFB2728	daf-12(sa204) X	vlcEx1365[srh-211::tagRFP, elt-2::GFP]	vlcEx822 [xbx-1::NLS::GFP; rol-6(su1006]	25	21	PHA	2	2
262	NFB2728	daf-12(sa204) X	vlcEx1365[srh-211::tagRFP, elt-2::GFP]	vlcEx822 [xbx-1::NLS::GFP; rol-6(su1006]	25	22	PHA	2	2
263	NFB2728	daf-12(sa204) X	vlcEx1365[srh-211::tagRFP, elt-2::GFP]	vlcEx822 [xbx-1::NLS::GFP; rol-6(su1006]	25	23	PHA	2	2
264	NFB2728	daf-12(sa204) X	vlcEx1365[srh-211::tagRFP, elt-2::GFP]	vlcEx822 [xbx-1::NLS::GFP; rol-6(su1006]	25	24	PHA	2	1
265	NFB2728	daf-12(sa204) X	vlcEx1365[srh-211::tagRFP, elt-2::GFP]	vlcEx822 [xbx-1::NLS::GFP; rol-6(su1006]	25	25	PHA	2	2
266	NFB2728	daf-12(sa204) X	vlcEx1365[srh-211::tagRFP, elt-2::GFP]	vlcEx822 [xbx-1::NLS::GFP; rol-6(su1006]	25	26	PHA	2	2
267	NFB2728	daf-12(sa204) X	vlcEx1365[srh-211::tagRFP, elt-2::GFP]	vlcEx822 [xbx-1::NLS::GFP; rol-6(su1006]	25	27	PHA	1	0
268	NFB2728	daf-12(sa204) X	vlcEx1365[srh-211::tagRFP, elt-2::GFP]	vlcEx822 [xbx-1::NLS::GFP; rol-6(su1006]	25	28	PHA	2	2
269	NFB2728	daf-12(sa204) X	vlcEx1365[srh-211::tagRFP, elt-2::GFP]	vlcEx822 [xbx-1::NLS::GFP; rol-6(su1006]	25	29	PHA	2	2
270	NFB2728	daf-12(sa204) X	vlcEx1365[srh-211::tagRFP, elt-2::GFP]	vlcEx822 [xbx-1::NLS::GFP; rol-6(su1006]	25	30	PHA	2	2
271	NFB2729	fkh-8(tm292) II; daf-12(sa204) X	vlcEx1365[srh-211::tagRFP, elt-2::GFP]	vlcEx822 [xbx-1::NLS::GFP; rol-6(su1006]	25	1	PHA	2	2
272	NFB2729	fkh-8(tm292) II; daf-12(sa204) X	vlcEx1365[srh-211::tagRFP, elt-2::GFP]	vlcEx822 [xbx-1::NLS::GFP; rol-6(su1006]	25	2	PHA	2	1
273	NFB2729	fkh-8(tm292) II; daf-12(sa204) X	vlcEx1365[srh-211::tagRFP, elt-2::GFP]	vlcEx822 [xbx-1::NLS::GFP; rol-6(su1006]	25	3	PHA	2	2
274	NFB2729	fkh-8(tm292) II; daf-12(sa204) X	vlcEx1365[srh-211::tagRFP, elt-2::GFP]	vlcEx822 [xbx-1::NLS::GFP; rol-6(su1006]	25	4	PHA	1	1
275	NFB2729	fkh-8(tm292) II; daf-12(sa204) X	vlcEx1365[srh-211::tagRFP, elt-2::GFP]	vlcEx822 [xbx-1::NLS::GFP; rol-6(su1006]	25	5	PHA	2	2
276	NFB2729	fkh-8(tm292) II; daf-12(sa204) X	vlcEx1365[srh-211::tagRFP, elt-2::GFP]	vlcEx822 [xbx-1::NLS::GFP; rol-6(su1006]	25	6	PHA	2	2
277	NFB2729	fkh-8(tm292) II; daf-12(sa204) X	vlcEx1365[srh-211::tagRFP, elt-2::GFP]	vlcEx822 [xbx-1::NLS::GFP; rol-6(su1006]	25	7	PHA	2	2
278	NFB2729	fkh-8(tm292) II; daf-12(sa204) X	vlcEx1365[srh-211::tagRFP, elt-2::GFP]	vlcEx822 [xbx-1::NLS::GFP; rol-6(su1006]	25	8	PHA	2	2
279	NFB2729	fkh-8(tm292) II; daf-12(sa204) X	vlcEx1365[srh-211::tagRFP, elt-2::GFP]	vlcEx822 [xbx-1::NLS::GFP; rol-6(su1006]	25	9	PHA	2	2
280	NFB2729	fkh-8(tm292) II; daf-12(sa204) X	vlcEx1365[srh-211::tagRFP, elt-2::GFP]	vlcEx822 [xbx-1::NLS::GFP; rol-6(su1006]	25	10	PHA	2	2
281	NFB2729	fkh-8(tm292) II; daf-12(sa204) X	vlcEx1365[srh-211::tagRFP, elt-2::GFP]	vlcEx822 [xbx-1::NLS::GFP; rol-6(su1006]	25	11	PHA	2	2
282	NFB2729	fkh-8(tm292) II; daf-12(sa204) X	vlcEx1365[srh-211::tagRFP, elt-2::GFP]	vlcEx822 [xbx-1::NLS::GFP; rol-6(su1006]	25	12	PHA	2	2
283	NFB2729	fkh-8(tm292) II; daf-12(sa204) X	vlcEx1365[srh-211::tagRFP, elt-2::GFP]	vlcEx822 [xbx-1::NLS::GFP; rol-6(su1006]	25	13	PHA	2	1
284	NFB2729	fkh-8(tm292) II; daf-12(sa204) X	vlcEx1365[srh-211::tagRFP, elt-2::GFP]	vlcEx822 [xbx-1::NLS::GFP; rol-6(su1006]	25	14	PHA	2	2
285	NFB2729	fkh-8(tm292) II; daf-12(sa204) X	vlcEx1365[srh-211::tagRFP, elt-2::GFP]	vlcEx822 [xbx-1::NLS::GFP; rol-6(su1006]	25	15	PHA	2	2
286	NFB2729	fkh-8(tm292) II; daf-12(sa204) X	vlcEx1365[srh-211::tagRFP, elt-2::GFP]	vlcEx822 [xbx-1::NLS::GFP; rol-6(su1006]	25	16	PHA	2	1
287	NFB2729	fkh-8(tm292) II; daf-12(sa204) X	vlcEx1365[srh-211::tagRFP, elt-2::GFP]	vlcEx822 [xbx-1::NLS::GFP; rol-6(su1006]	25	17	PHA	2	2
288	NFB2729	fkh-8(tm292) II; daf-12(sa204) X	vlcEx1365[srh-211::tagRFP, elt-2::GFP]	vlcEx822 [xbx-1::NLS::GFP; rol-6(su1006]	25	18	PHA	2	2
289	NFB2729	fkh-8(tm292) II; daf-12(sa204) X	vlcEx1365[srh-211::tagRFP, elt-2::GFP]	vlcEx822 [xbx-1::NLS::GFP; rol-6(su1006]	25	19	PHA	2	2
290	NFB2729	fkh-8(tm292) II; daf-12(sa204) X	vlcEx1365[srh-211::tagRFP, elt-2::GFP]	vlcEx822 [xbx-1::NLS::GFP; rol-6(su1006]	25	20	PHA	1	1
291	NFB2729	fkh-8(tm292) II; daf-12(sa204) X	vlcEx1365[srh-211::tagRFP, elt-2::GFP]	vlcEx822 [xbx-1::NLS::GFP; rol-6(su1006]	25	21	PHA	2	2
292	NFB2729	fkh-8(tm292) II; daf-12(sa204) X	vlcEx1365[srh-211::tagRFP, elt-2::GFP]	vlcEx822 [xbx-1::NLS::GFP; rol-6(su1006]	25	22	PHA	1	1
293	NFB2729	fkh-8(tm292) II; daf-12(sa204) X	vlcEx1365[srh-211::tagRFP, elt-2::GFP]	vlcEx822 [xbx-1::NLS::GFP; rol-6(su1006]	25	23	PHA	2	2
294	NFB2729	fkh-8(tm292) II; daf-12(sa204) X	vlcEx1365[srh-211::tagRFP, elt-2::GFP]	vlcEx822 [xbx-1::NLS::GFP; rol-6(su1006]	25	24	PHA	2	2
295	NFB2729	fkh-8(tm292) II; daf-12(sa204) X	vlcEx1365[srh-211::tagRFP, elt-2::GFP]	vlcEx822 [xbx-1::NLS::GFP; rol-6(su1006]	25	25	PHA	2	1
296	NFB2729	fkh-8(tm292) II; daf-12(sa204) X	vlcEx1365[srh-211::tagRFP, elt-2::GFP]	vlcEx822 [xbx-1::NLS::GFP; rol-6(su1006]	25	26	PHA	2	2
297	NFB2729	fkh-8(tm292) II; daf-12(sa204) X	vlcEx1365[srh-211::tagRFP, elt-2::GFP]	vlcEx822 [xbx-1::NLS::GFP; rol-6(su1006]	25	27	PHA	2	2
298	NFB2729	fkh-8(tm292) II; daf-12(sa204) X	vlcEx1365[srh-211::tagRFP, elt-2::GFP]	vlcEx822 [xbx-1::NLS::GFP; rol-6(su1006]	25	28	PHA	2	0
299	NFB2729	fkh-8(tm292) II; daf-12(sa204) X	vlcEx1365[srh-211::tagRFP, elt-2::GFP]	vlcEx822 [xbx-1::NLS::GFP; rol-6(su1006]	25	29	PHA	1	1
300	NFB2729	fkh-8(tm292) II; daf-12(sa204) X	vlcEx1365[srh-211::tagRFP, elt-2::GFP]	vlcEx822 [xbx-1::NLS::GFP; rol-6(su1006]	25	30	PHA	1	1
301	NFB2730	daf-19(m86); daf-12(sa204) X	vlcEx1365[srh-211::tagRFP, elt-2::GFP]	vlcEx822 [xbx-1::NLS::GFP; rol-6(su1006]	25	1	PHA	2	2
302	NFB2730	daf-19(m86); daf-12(sa204) X	vlcEx1365[srh-211::tagRFP, elt-2::GFP]	vlcEx822 [xbx-1::NLS::GFP; rol-6(su1006]	25	2	PHA	2	2
303	NFB2730	daf-19(m86); daf-12(sa204) X	vlcEx1365[srh-211::tagRFP, elt-2::GFP]	vlcEx822 [xbx-1::NLS::GFP; rol-6(su1006]	25	3	PHA	1	1
304	NFB2730	daf-19(m86); daf-12(sa204) X	vlcEx1365[srh-211::tagRFP, elt-2::GFP]	vlcEx822 [xbx-1::NLS::GFP; rol-6(su1006]	25	4	PHA	2	1
305	NFB2730	daf-19(m86); daf-12(sa204) X	vlcEx1365[srh-211::tagRFP, elt-2::GFP]	vlcEx822 [xbx-1::NLS::GFP; rol-6(su1006]	25	5	PHA	2	2
306	NFB2730	daf-19(m86); daf-12(sa204) X	vlcEx1365[srh-211::tagRFP, elt-2::GFP]	vlcEx822 [xbx-1::NLS::GFP; rol-6(su1006]	25	6	PHA	1	1
307	NFB2730	daf-19(m86); daf-12(sa204) X	vlcEx1365[srh-211::tagRFP, elt-2::GFP]	vlcEx822 [xbx-1::NLS::GFP; rol-6(su1006]	25	7	PHA	2	2
308	NFB2730	daf-19(m86); daf-12(sa204) X	vlcEx1365[srh-211::tagRFP, elt-2::GFP]	vlcEx822 [xbx-1::NLS::GFP; rol-6(su1006]	25	8	PHA	2	2
309	NFB2730	daf-19(m86); daf-12(sa204) X	vlcEx1365[srh-211::tagRFP, elt-2::GFP]	vlcEx822 [xbx-1::NLS::GFP; rol-6(su1006]	25	9	PHA	2	2
310	NFB2730	daf-19(m86); daf-12(sa204) X	vlcEx1365[srh-211::tagRFP, elt-2::GFP]	vlcEx822 [xbx-1::NLS::GFP; rol-6(su1006]	25	10	PHA	2	2
311	NFB2730	daf-19(m86); daf-12(sa204) X	vlcEx1365[srh-211::tagRFP, elt-2::GFP]	vlcEx822 [xbx-1::NLS::GFP; rol-6(su1006]	25	11	PHA	2	2
312	NFB2730	daf-19(m86); daf-12(sa204) X	vlcEx1365[srh-211::tagRFP, elt-2::GFP]	vlcEx822 [xbx-1::NLS::GFP; rol-6(su1006]	25	12	PHA	1	1
313	NFB2730	daf-19(m86); daf-12(sa204) X	vlcEx1365[srh-211::tagRFP, elt-2::GFP]	vlcEx822 [xbx-1::NLS::GFP; rol-6(su1006]	25	13	PHA	2	2
314	NFB2730	daf-19(m86); daf-12(sa204) X	vlcEx1365[srh-211::tagRFP, elt-2::GFP]	vlcEx822 [xbx-1::NLS::GFP; rol-6(su1006]	25	14	PHA	2	2
315	NFB2730	daf-19(m86); daf-12(sa204) X	vlcEx1365[srh-211::tagRFP, elt-2::GFP]	vlcEx822 [xbx-1::NLS::GFP; rol-6(su1006]	25	15	PHA	2	2
316	NFB2730	daf-19(m86); daf-12(sa204) X	vlcEx1365[srh-211::tagRFP, elt-2::GFP]	vlcEx822 [xbx-1::NLS::GFP; rol-6(su1006]	25	16	PHA	2	2
317	NFB2730	daf-19(m86); daf-12(sa204) X	vlcEx1365[srh-211::tagRFP, elt-2::GFP]	vlcEx822 [xbx-1::NLS::GFP; rol-6(su1006]	25	17	PHA	2	1
318	NFB2730	daf-19(m86); daf-12(sa204) X	vlcEx1365[srh-211::tagRFP, elt-2::GFP]	vlcEx822 [xbx-1::NLS::GFP; rol-6(su1006]	25	18	PHA	2	1
319	NFB2730	daf-19(m86); daf-12(sa204) X	vlcEx1365[srh-211::tagRFP, elt-2::GFP]	vlcEx822 [xbx-1::NLS::GFP; rol-6(su1006]	25	19	PHA	2	2
320	NFB2730	daf-19(m86); daf-12(sa204) X	vlcEx1365[srh-211::tagRFP, elt-2::GFP]	vlcEx822 [xbx-1::NLS::GFP; rol-6(su1006]	25	20	PHA	2	2
321	NFB2730	daf-19(m86); daf-12(sa204) X	vlcEx1365[srh-211::tagRFP, elt-2::GFP]	vlcEx822 [xbx-1::NLS::GFP; rol-6(su1006]	25	21	PHA	1	1
322	NFB2730	daf-19(m86); daf-12(sa204) X	vlcEx1365[srh-211::tagRFP, elt-2::GFP]	vlcEx822 [xbx-1::NLS::GFP; rol-6(su1006]	25	22	PHA	2	1
323	NFB2730	daf-19(m86); daf-12(sa204) X	vlcEx1365[srh-211::tagRFP, elt-2::GFP]	vlcEx822 [xbx-1::NLS::GFP; rol-6(su1006]	25	23	PHA	2	2
324	NFB2730	daf-19(m86); daf-12(sa204) X	vlcEx1365[srh-211::tagRFP, elt-2::GFP]	vlcEx822 [xbx-1::NLS::GFP; rol-6(su1006]	25	24	PHA	2	2
325	NFB2730	daf-19(m86); daf-12(sa204) X	vlcEx1365[srh-211::tagRFP, elt-2::GFP]	vlcEx822 [xbx-1::NLS::GFP; rol-6(su1006]	25	25	PHA	2	2
326	NFB2730	daf-19(m86); daf-12(sa204) X	vlcEx1365[srh-211::tagRFP, elt-2::GFP]	vlcEx822 [xbx-1::NLS::GFP; rol-6(su1006]	25	26	PHA	2	2
327	NFB2730	daf-19(m86); daf-12(sa204) X	vlcEx1365[srh-211::tagRFP, elt-2::GFP]	vlcEx822 [xbx-1::NLS::GFP; rol-6(su1006]	25	27	PHA	1	1
328	NFB2730	daf-19(m86); daf-12(sa204) X	vlcEx1365[srh-211::tagRFP, elt-2::GFP]	vlcEx822 [xbx-1::NLS::GFP; rol-6(su1006]	25	28	PHA	2	2
329	NFB2730	daf-19(m86); daf-12(sa204) X	vlcEx1365[srh-211::tagRFP, elt-2::GFP]	vlcEx822 [xbx-1::NLS::GFP; rol-6(su1006]	25	29	PHA	2	1
330	NFB2730	daf-19(m86); daf-12(sa204) X	vlcEx1365[srh-211::tagRFP, elt-2::GFP]	vlcEx822 [xbx-1::NLS::GFP; rol-6(su1006]	25	30	PHA	2	2
331	NFB2731	fkh-8(tm292) II; daf-19(m86); daf-12(sa204) X	vlcEx1365[srh-211::tagRFP, elt-2::GFP]	vlcEx822 [xbx-1::NLS::GFP; rol-6(su1006]	25	1	PHA	2	0
332	NFB2731	fkh-8(tm292) II; daf-19(m86); daf-12(sa204) X	vlcEx1365[srh-211::tagRFP, elt-2::GFP]	vlcEx822 [xbx-1::NLS::GFP; rol-6(su1006]	25	2	PHA	2	0
333	NFB2731	fkh-8(tm292) II; daf-19(m86); daf-12(sa204) X	vlcEx1365[srh-211::tagRFP, elt-2::GFP]	vlcEx822 [xbx-1::NLS::GFP; rol-6(su1006]	25	3	PHA	2	0
334	NFB2731	fkh-8(tm292) II; daf-19(m86); daf-12(sa204) X	vlcEx1365[srh-211::tagRFP, elt-2::GFP]	vlcEx822 [xbx-1::NLS::GFP; rol-6(su1006]	25	4	PHA	2	0
335	NFB2731	fkh-8(tm292) II; daf-19(m86); daf-12(sa204) X	vlcEx1365[srh-211::tagRFP, elt-2::GFP]	vlcEx822 [xbx-1::NLS::GFP; rol-6(su1006]	25	5	PHA	2	0
336	NFB2731	fkh-8(tm292) II; daf-19(m86); daf-12(sa204) X	vlcEx1365[srh-211::tagRFP, elt-2::GFP]	vlcEx822 [xbx-1::NLS::GFP; rol-6(su1006]	25	6	PHA	2	0
337	NFB2731	fkh-8(tm292) II; daf-19(m86); daf-12(sa204) X	vlcEx1365[srh-211::tagRFP, elt-2::GFP]	vlcEx822 [xbx-1::NLS::GFP; rol-6(su1006]	25	7	PHA	2	0
338	NFB2731	fkh-8(tm292) II; daf-19(m86); daf-12(sa204) X	vlcEx1365[srh-211::tagRFP, elt-2::GFP]	vlcEx822 [xbx-1::NLS::GFP; rol-6(su1006]	25	8	PHA	2	0
339	NFB2731	fkh-8(tm292) II; daf-19(m86); daf-12(sa204) X	vlcEx1365[srh-211::tagRFP, elt-2::GFP]	vlcEx822 [xbx-1::NLS::GFP; rol-6(su1006]	25	9	PHA	2	0
340	NFB2731	fkh-8(tm292) II; daf-19(m86); daf-12(sa204) X	vlcEx1365[srh-211::tagRFP, elt-2::GFP]	vlcEx822 [xbx-1::NLS::GFP; rol-6(su1006]	25	10	PHA	2	0
341	NFB2731	fkh-8(tm292) II; daf-19(m86); daf-12(sa204) X	vlcEx1365[srh-211::tagRFP, elt-2::GFP]	vlcEx822 [xbx-1::NLS::GFP; rol-6(su1006]	25	11	PHA	2	0
342	NFB2731	fkh-8(tm292) II; daf-19(m86); daf-12(sa204) X	vlcEx1365[srh-211::tagRFP, elt-2::GFP]	vlcEx822 [xbx-1::NLS::GFP; rol-6(su1006]	25	12	PHA	2	0
343	NFB2731	fkh-8(tm292) II; daf-19(m86); daf-12(sa204) X	vlcEx1365[srh-211::tagRFP, elt-2::GFP]	vlcEx822 [xbx-1::NLS::GFP; rol-6(su1006]	25	13	PHA	2	0
344	NFB2731	fkh-8(tm292) II; daf-19(m86); daf-12(sa204) X	vlcEx1365[srh-211::tagRFP, elt-2::GFP]	vlcEx822 [xbx-1::NLS::GFP; rol-6(su1006]	25	14	PHA	2	0
345	NFB2731	fkh-8(tm292) II; daf-19(m86); daf-12(sa204) X	vlcEx1365[srh-211::tagRFP, elt-2::GFP]	vlcEx822 [xbx-1::NLS::GFP; rol-6(su1006]	25	15	PHA	2	0
346	NFB2731	fkh-8(tm292) II; daf-19(m86); daf-12(sa204) X	vlcEx1365[srh-211::tagRFP, elt-2::GFP]	vlcEx822 [xbx-1::NLS::GFP; rol-6(su1006]	25	16	PHA	2	0
347	NFB2731	fkh-8(tm292) II; daf-19(m86); daf-12(sa204) X	vlcEx1365[srh-211::tagRFP, elt-2::GFP]	vlcEx822 [xbx-1::NLS::GFP; rol-6(su1006]	25	17	PHA	1	0
348	NFB2731	fkh-8(tm292) II; daf-19(m86); daf-12(sa204) X	vlcEx1365[srh-211::tagRFP, elt-2::GFP]	vlcEx822 [xbx-1::NLS::GFP; rol-6(su1006]	25	18	PHA	2	0
349	NFB2731	fkh-8(tm292) II; daf-19(m86); daf-12(sa204) X	vlcEx1365[srh-211::tagRFP, elt-2::GFP]	vlcEx822 [xbx-1::NLS::GFP; rol-6(su1006]	25	19	PHA	2	0
350	NFB2731	fkh-8(tm292) II; daf-19(m86); daf-12(sa204) X	vlcEx1365[srh-211::tagRFP, elt-2::GFP]	vlcEx822 [xbx-1::NLS::GFP; rol-6(su1006]	25	20	PHA	2	0
351	NFB2731	fkh-8(tm292) II; daf-19(m86); daf-12(sa204) X	vlcEx1365[srh-211::tagRFP, elt-2::GFP]	vlcEx822 [xbx-1::NLS::GFP; rol-6(su1006]	25	21	PHA	2	0
352	NFB2731	fkh-8(tm292) II; daf-19(m86); daf-12(sa204) X	vlcEx1365[srh-211::tagRFP, elt-2::GFP]	vlcEx822 [xbx-1::NLS::GFP; rol-6(su1006]	25	22	PHA	2	0
353	NFB2731	fkh-8(tm292) II; daf-19(m86); daf-12(sa204) X	vlcEx1365[srh-211::tagRFP, elt-2::GFP]	vlcEx822 [xbx-1::NLS::GFP; rol-6(su1006]	25	23	PHA	2	0
354	NFB2731	fkh-8(tm292) II; daf-19(m86); daf-12(sa204) X	vlcEx1365[srh-211::tagRFP, elt-2::GFP]	vlcEx822 [xbx-1::NLS::GFP; rol-6(su1006]	25	24	PHA	2	0
355	NFB2731	fkh-8(tm292) II; daf-19(m86); daf-12(sa204) X	vlcEx1365[srh-211::tagRFP, elt-2::GFP]	vlcEx822 [xbx-1::NLS::GFP; rol-6(su1006]	25	25	PHA	2	0
356	NFB2731	fkh-8(tm292) II; daf-19(m86); daf-12(sa204) X	vlcEx1365[srh-211::tagRFP, elt-2::GFP]	vlcEx822 [xbx-1::NLS::GFP; rol-6(su1006]	25	26	PHA	2	0
357	NFB2731	fkh-8(tm292) II; daf-19(m86); daf-12(sa204) X	vlcEx1365[srh-211::tagRFP, elt-2::GFP]	vlcEx822 [xbx-1::NLS::GFP; rol-6(su1006]	25	27	PHA	2	0
358	NFB2731	fkh-8(tm292) II; daf-19(m86); daf-12(sa204) X	vlcEx1365[srh-211::tagRFP, elt-2::GFP]	vlcEx822 [xbx-1::NLS::GFP; rol-6(su1006]	25	28	PHA	2	0
359	NFB2731	fkh-8(tm292) II; daf-19(m86); daf-12(sa204) X	vlcEx1365[srh-211::tagRFP, elt-2::GFP]	vlcEx822 [xbx-1::NLS::GFP; rol-6(su1006]	25	29	PHA	1	0
360	NFB2731	fkh-8(tm292) II; daf-19(m86); daf-12(sa204) X	vlcEx1365[srh-211::tagRFP, elt-2::GFP]	vlcEx822 [xbx-1::NLS::GFP; rol-6(su1006]	25	30	PHA	2	0

## Sheet: F4 D pval
	Frecuencies (reporter ON)	CEPV		CEPD		PHA
	Background	NO	YES	NO	YES	NO	YES
	daf-12(sa204)	7	53	3	57	12	44
	fkh-8(tm292); daf-12(sa204)	6	54	9	51	6	49
	daf-19(m86); daf-12(sa204)	9	51	12	48	5	50
	fkh-8(tm292); daf-19(m86); daf-12(sa204)	54	6	59	1	58	0
2-tailed Fisher
Background 1	Background 2	CEPV	CEPD	PHA
daf-12(sa204)	fkh-8(tm292); daf-12(sa204)	1	0.125448	0.197455
daf-12(sa204)	daf-19(m86); daf-12(sa204)	0.789121	0.0245746	0.112225
daf-12(sa204)	fkh-8(tm292); daf-19(m86); daf-12(sa204)	4.12731e-19	4.54475e-29	6.99028e-21
fkh-8(tm292); daf-12(sa204)	daf-19(m86); daf-12(sa204)	0.582221	0.631672	1
fkh-8(tm292); daf-12(sa204)	fkh-8(tm292); daf-19(m86); daf-12(sa204)	5.25065e-20	5.32e-23	1.00283e-25
daf-19(m86); daf-12(sa204)	fkh-8(tm292); daf-19(m86); daf-12(sa204)	1.81193e-17	1.30393e-20	9.40155e-27
	Bonferroni	0.00833333

## Sheet: F4 FS1
Background	dat-1 Reporter (R)	daf-19 Reporter (G)	T (ºC)	Worm	CEPV R	CEPV RG	CEPD R	CEPD RG	ADE R	ADE RG	PDE R	PDE RG		Background	Amphids reporter (R)	daf-19 Reporter (G)	T (ºC)	Worm	Amphids R	Amphids RG		Background	dat-1 Reporter (R)	fkh-8 Reporter (G)	T (ºC)	Worm	PDE R	PDE RG
wild type	otIs181	vlcEx361	20	1	2	2	2	2	2	2	2	2		wild type	DiD	vlcEx361	20	1	12	5		wild type	otIs181	wgIs652	20	1	2	2
wild type	otIs181	vlcEx361	20	2	2	2	2	2	2	2	2	2		wild type	DiD	vlcEx361	20	2	12	7		wild type	otIs181	wgIs652	20	2	2	2
wild type	otIs181	vlcEx361	20	3	2	2	2	2	0	0	2	2		wild type	DiD	vlcEx361	20	3	12	4		wild type	otIs181	wgIs652	20	3	2	2
wild type	otIs181	vlcEx361	20	4	2	2	1	1	1	1	1	1		wild type	DiD	vlcEx361	20	4	12	5		wild type	otIs181	wgIs652	20	4	2	2
wild type	otIs181	vlcEx361	20	5	2	2	2	2	2	2	2	2		wild type	DiD	vlcEx361	20	5	12	5		wild type	otIs181	wgIs652	20	5	2	1
wild type	otIs181	vlcEx361	20	6	2	2	2	2	1	1	2	2		wild type	DiD	vlcEx361	20	6	11	6		wild type	otIs181	wgIs652	20	6	2	2
wild type	otIs181	vlcEx361	20	7	2	2	1	1	1	1	2	2		wild type	DiD	vlcEx361	20	7	12	7		wild type	otIs181	wgIs652	20	7	2	2
wild type	otIs181	vlcEx361	20	8	2	2	2	2	1	1	2	2		wild type	DiD	vlcEx361	20	8	11	6		wild type	otIs181	wgIs652	20	8	2	2
wild type	otIs181	vlcEx361	20	9	2	2	2	2	2	2	2	2		wild type	DiD	vlcEx361	20	9	12	7		wild type	otIs181	wgIs652	20	9	2	2
wild type	otIs181	vlcEx361	20	10	2	2	2	2	2	2	2	2		wild type	DiD	vlcEx361	20	10	12	7		wild type	otIs181	wgIs652	20	10	2	1
wild type	otIs181	vlcEx361	20	11	2	2	1	1	2	2	2	2		fkh-8(vlc43)	DiD	vlcEx361	20	1	12	6		wild type	otIs181	wgIs652	20	11	2	2
wild type	otIs181	vlcEx361	20	12	1	1	1	1	1	1	1	1		fkh-8(vlc43)	DiD	vlcEx361	20	2	12	5		wild type	otIs181	wgIs652	20	12	2	2
wild type	otIs181	vlcEx361	20	13	2	2	2	2	2	2	2	1		fkh-8(vlc43)	DiD	vlcEx361	20	3	12	5		wild type	otIs181	wgIs652	20	13	2	2
wild type	otIs181	vlcEx361	20	14	2	2	2	2	2	2	2	2		fkh-8(vlc43)	DiD	vlcEx361	20	4	12	4		wild type	otIs181	wgIs652	20	14	2	2
wild type	otIs181	vlcEx361	20	15	2	2	2	2	2	2	2	2		fkh-8(vlc43)	DiD	vlcEx361	20	5	12	5		wild type	otIs181	wgIs652	20	15	2	2
wild type	otIs181	vlcEx361	20	16	2	2	2	2	1	1	2	2		fkh-8(vlc43)	DiD	vlcEx361	20	6	12	6		wild type	otIs181	wgIs652	20	16	1	1
wild type	otIs181	vlcEx361	20	17	2	2	2	2	2	2	2	2		fkh-8(vlc43)	DiD	vlcEx361	20	7	12	6		wild type	otIs181	wgIs652	20	17	2	1
wild type	otIs181	vlcEx361	20	18	2	2	2	2	2	1	2	2		fkh-8(vlc43)	DiD	vlcEx361	20	8	11	6		wild type	otIs181	wgIs652	20	18	2	2
wild type	otIs181	vlcEx361	20	19	2	2	2	2	2	2	2	2		fkh-8(vlc43)	DiD	vlcEx361	20	9	12	6		wild type	otIs181	wgIs652	20	19	2	1
wild type	otIs181	vlcEx361	20	20	2	2	2	2	2	2	2	2		fkh-8(vlc43)	DiD	vlcEx361	20	10	12	5		wild type	otIs181	wgIs652	20	20	1	1
wild type	otIs181	vlcEx361	20	21	2	2	2	2	2	2	2	1										wild type	otIs181	wgIs652	20	21	2	1
wild type	otIs181	vlcEx361	20	22	2	2	2	2	2	2	2	2										wild type	otIs181	wgIs652	20	22	2	2
wild type	otIs181	vlcEx361	20	23	2	2	2	2	2	2	2	2										wild type	otIs181	wgIs652	20	23	2	1
wild type	otIs181	vlcEx361	20	24	1	1	2	2	2	2	2	2										wild type	otIs181	wgIs652	20	24	2	2
wild type	otIs181	vlcEx361	20	25	2	2	2	2	2	2	2	2										wild type	otIs181	wgIs652	20	25	2	2
wild type	otIs181	vlcEx361	20	26	1	1	2	2	2	2	2	2										wild type	otIs181	wgIs652	20	26	2	1
wild type	otIs181	vlcEx361	20	27	2	1	2	2	2	2	2	1										wild type	otIs181	wgIs652	20	27	2	2
wild type	otIs181	vlcEx361	20	28	2	2	2	2	2	2	2	2										wild type	otIs181	wgIs652	20	28	2	2
wild type	otIs181	vlcEx361	20	29	2	2	2	2	2	2	2	2										wild type	otIs181	wgIs652	20	29	2	2
wild type	otIs181	vlcEx361	20	30	2	1	2	2	2	2	2	2										wild type	otIs181	wgIs652	20	30	2	2
wild type	otIs181	vlcEx361	20	31	2	2	2	2	2	2	2	2										wild type	otIs181	wgIs652	20	31	2	2
wild type	otIs181	vlcEx361	20	32	2	1	2	1	2	1	2	1										wild type	otIs181	wgIs652	20	32	2	2
wild type	otIs181	vlcEx361	20	33	2	2	2	2	2	2	2	2										wild type	otIs181	wgIs652	20	33	2	2
wild type	otIs181	vlcEx361	20	34	2	2	2	2	2	2	2	2										wild type	otIs181	wgIs652	20	34	2	2
wild type	otIs181	vlcEx361	20	35	2	2	2	2	2	1	2	1										wild type	otIs181	wgIs652	20	35	2	2
wild type	otIs181	vlcEx361	20	36	2	2	2	2	2	2	2	2										wild type	otIs181	wgIs652	20	36	2	2
wild type	otIs181	vlcEx361	20	37	2	2	2	2	2	2	2	2										wild type	otIs181	wgIs652	20	37	2	2
wild type	otIs181	vlcEx361	20	38	1	1	2	2	2	2	2	2										wild type	otIs181	wgIs652	20	38	2	2
wild type	otIs181	vlcEx361	20	39	2	2	2	2	2	2	2	2										wild type	otIs181	wgIs652	20	39	2	2
wild type	otIs181	vlcEx361	20	40	2	1	2	1	2	2	2	1										wild type	otIs181	wgIs652	20	40	2	2
wild type	otIs181	vlcEx361	20	41	2	2	2	2	2	2	2	2										wild type	otIs181	wgIs652	20	41	2	2
wild type	otIs181	vlcEx361	20	42	2	2	2	2	2	2	2	2										wild type	otIs181	wgIs652	20	42	2	2
wild type	otIs181	vlcEx361	20	43	2	2	2	2	2	2	2	2										wild type	otIs181	wgIs652	20	43	2	2
wild type	otIs181	vlcEx361	20	44	2	2	2	2	2	2	2	2										wild type	otIs181	wgIs652	20	44	2	2
wild type	otIs181	vlcEx361	20	45	2	2	2	2	2	2	2	2										wild type	otIs181	wgIs652	20	45	2	2
wild type	otIs181	vlcEx361	20	46	2	2	2	2	2	2	2	2										wild type	otIs181	wgIs652	20	46	2	2
wild type	otIs181	vlcEx361	20	47	2	2	2	2	2	2	2	2										wild type	otIs181	wgIs652	20	47	2	2
wild type	otIs181	vlcEx361	20	48	2	2	2	2	1	1	2	2										wild type	otIs181	wgIs652	20	48	2	2
wild type	otIs181	vlcEx361	20	49	2	2	2	2	2	2	2	2										wild type	otIs181	wgIs652	20	49	2	2
wild type	otIs181	vlcEx361	20	50	2	2	2	1	2	2	2	1										wild type	otIs181	wgIs652	20	50	2	1
fkh-8(vlc43)	otIs181	vlcEx361	20	1	2	2	2	2	2	2	2	2										wild type	otIs181	wgIs652	20	51	2	2
fkh-8(vlc43)	otIs181	vlcEx361	20	2	2	2	2	2	2	2	2	2										wild type	otIs181	wgIs652	20	52	2	2
fkh-8(vlc43)	otIs181	vlcEx361	20	3	2	2	2	2	2	2	2	2										wild type	otIs181	wgIs652	20	53	2	2
fkh-8(vlc43)	otIs181	vlcEx361	20	4	2	2	1	1	2	2	2	2										daf-19(m86); daf-12(sa204)	otIs181	wgIs652	20	1	2	2
fkh-8(vlc43)	otIs181	vlcEx361	20	5	2	1	2	2	2	2	2	2										daf-19(m86); daf-12(sa204)	otIs181	wgIs652	20	2	2	1
fkh-8(vlc43)	otIs181	vlcEx361	20	6	2	2	2	2	2	2	2	2										daf-19(m86); daf-12(sa204)	otIs181	wgIs652	20	3	2	1
fkh-8(vlc43)	otIs181	vlcEx361	20	7	2	2	2	2	2	2	2	2										daf-19(m86); daf-12(sa204)	otIs181	wgIs652	20	4	2	2
fkh-8(vlc43)	otIs181	vlcEx361	20	8	2	2	2	2	1	1	2	1										daf-19(m86); daf-12(sa204)	otIs181	wgIs652	20	5	2	2
fkh-8(vlc43)	otIs181	vlcEx361	20	9	2	2	2	2	2	2	2	2										daf-19(m86); daf-12(sa204)	otIs181	wgIs652	20	6	2	2
fkh-8(vlc43)	otIs181	vlcEx361	20	10	2	2	2	2	1	1	2	1										daf-19(m86); daf-12(sa204)	otIs181	wgIs652	20	7	2	2
fkh-8(vlc43)	otIs181	vlcEx361	20	11	2	2	2	2	2	2	2	2										daf-19(m86); daf-12(sa204)	otIs181	wgIs652	20	8	2	2
fkh-8(vlc43)	otIs181	vlcEx361	20	12	2	2	2	2	2	2	2	2										daf-19(m86); daf-12(sa204)	otIs181	wgIs652	20	9	2	2
fkh-8(vlc43)	otIs181	vlcEx361	20	13	2	2	1	1	2	2	2	2										daf-19(m86); daf-12(sa204)	otIs181	wgIs652	20	10	2	2
fkh-8(vlc43)	otIs181	vlcEx361	20	14	2	2	2	2	2	2	2	2										daf-19(m86); daf-12(sa204)	otIs181	wgIs652	20	11	2	2
fkh-8(vlc43)	otIs181	vlcEx361	20	15	2	2	2	2	2	2	2	2										daf-19(m86); daf-12(sa204)	otIs181	wgIs652	20	12	2	1
fkh-8(vlc43)	otIs181	vlcEx361	20	16	2	2	2	2	2	2	2	2										daf-19(m86); daf-12(sa204)	otIs181	wgIs652	20	13	1	2
fkh-8(vlc43)	otIs181	vlcEx361	20	17	2	2	2	2	2	2	2	2										daf-19(m86); daf-12(sa204)	otIs181	wgIs652	20	14	2	2
fkh-8(vlc43)	otIs181	vlcEx361	20	18	2	2	2	2	2	2	2	2										daf-19(m86); daf-12(sa204)	otIs181	wgIs652	20	15	2	1
fkh-8(vlc43)	otIs181	vlcEx361	20	19	2	2	2	2	2	1	2	1										daf-19(m86); daf-12(sa204)	otIs181	wgIs652	20	16	2	1
fkh-8(vlc43)	otIs181	vlcEx361	20	20	2	2	2	2	2	2	2	2										daf-19(m86); daf-12(sa204)	otIs181	wgIs652	20	17	1	1
fkh-8(vlc43)	otIs181	vlcEx361	20	21	2	2	2	2	2	2	2	2										daf-19(m86); daf-12(sa204)	otIs181	wgIs652	20	18	2	2
fkh-8(vlc43)	otIs181	vlcEx361	20	22	2	2	2	2	2	2	2	2										daf-19(m86); daf-12(sa204)	otIs181	wgIs652	20	19	2	2
fkh-8(vlc43)	otIs181	vlcEx361	20	23	2	2	2	2	2	2	2	2										daf-19(m86); daf-12(sa204)	otIs181	wgIs652	20	20	2	2
fkh-8(vlc43)	otIs181	vlcEx361	20	24	2	2	2	2	2	2	2	2										daf-19(m86); daf-12(sa204)	otIs181	wgIs652	20	21	2	2
fkh-8(vlc43)	otIs181	vlcEx361	20	25	2	2	2	2	2	2	2	2										daf-19(m86); daf-12(sa204)	otIs181	wgIs652	20	22	2	2
fkh-8(vlc43)	otIs181	vlcEx361	20	26	2	2	2	2	2	2	2	2										daf-19(m86); daf-12(sa204)	otIs181	wgIs652	20	23	2	2
fkh-8(vlc43)	otIs181	vlcEx361	20	27	2	2	2	2	2	2	2	2										daf-19(m86); daf-12(sa204)	otIs181	wgIs652	20	24	2	2
fkh-8(vlc43)	otIs181	vlcEx361	20	28	2	2	2	2	2	1	2	1										daf-19(m86); daf-12(sa204)	otIs181	wgIs652	20	25	2	2
fkh-8(vlc43)	otIs181	vlcEx361	20	29	2	2	2	2	2	2	2	2										daf-19(m86); daf-12(sa204)	otIs181	wgIs652	20	26	2	2
fkh-8(vlc43)	otIs181	vlcEx361	20	30	2	2	2	2	2	2	2	2										daf-19(m86); daf-12(sa204)	otIs181	wgIs652	20	27	2	1
fkh-8(vlc43)	otIs181	vlcEx361	20	31	2	2	2	2	2	2	2	2										daf-19(m86); daf-12(sa204)	otIs181	wgIs652	20	28	2	2
fkh-8(vlc43)	otIs181	vlcEx361	20	32	2	1	2	2	1	1	2	1										daf-19(m86); daf-12(sa204)	otIs181	wgIs652	20	29	2	2
fkh-8(vlc43)	otIs181	vlcEx361	20	33	2	2	2	2	2	2	2	1										daf-19(m86); daf-12(sa204)	otIs181	wgIs652	20	30	2	2
fkh-8(vlc43)	otIs181	vlcEx361	20	34	1	1	2	2	2	2	2	2										daf-19(m86); daf-12(sa204)	otIs181	wgIs652	20	31	2	2
fkh-8(vlc43)	otIs181	vlcEx361	20	35	2	2	2	2	2	2	2	2										daf-19(m86); daf-12(sa204)	otIs181	wgIs652	20	32	2	2
fkh-8(vlc43)	otIs181	vlcEx361	20	36	2	2	2	2	2	2	2	2										daf-19(m86); daf-12(sa204)	otIs181	wgIs652	20	33	2	2
fkh-8(vlc43)	otIs181	vlcEx361	20	37	2	1	2	2	2	2	2	2										daf-19(m86); daf-12(sa204)	otIs181	wgIs652	20	34	2	2
fkh-8(vlc43)	otIs181	vlcEx361	20	38	2	2	2	2	2	2	2	1										daf-19(m86); daf-12(sa204)	otIs181	wgIs652	20	35	2	2
fkh-8(vlc43)	otIs181	vlcEx361	20	39	2	2	2	2	2	2	2	2										daf-19(m86); daf-12(sa204)	otIs181	wgIs652	20	36	2	2
fkh-8(vlc43)	otIs181	vlcEx361	20	40	2	2	2	2	2	2	2	2										daf-19(m86); daf-12(sa204)	otIs181	wgIs652	20	37	2	2
fkh-8(vlc43)	otIs181	vlcEx361	20	41	2	2	2	2	1	1	2	2										daf-19(m86); daf-12(sa204)	otIs181	wgIs652	20	38	2	2
fkh-8(vlc43)	otIs181	vlcEx361	20	42	2	2	2	2	2	2	2	1										daf-19(m86); daf-12(sa204)	otIs181	wgIs652	20	39	2	2
fkh-8(vlc43)	otIs181	vlcEx361	20	43	2	2	2	2	2	2	2	2										daf-19(m86); daf-12(sa204)	otIs181	wgIs652	20	40	2	2
fkh-8(vlc43)	otIs181	vlcEx361	20	44	2	2	2	2	2	2	2	2										daf-19(m86); daf-12(sa204)	otIs181	wgIs652	20	41	2	1
fkh-8(vlc43)	otIs181	vlcEx361	20	45	2	2	2	2	2	2	2	1										daf-19(m86); daf-12(sa204)	otIs181	wgIs652	20	42	2	2
fkh-8(vlc43)	otIs181	vlcEx361	20	46	2	2	2	2	2	2	2	2										daf-19(m86); daf-12(sa204)	otIs181	wgIs652	20	43	2	2
fkh-8(vlc43)	otIs181	vlcEx361	20	47	2	2	2	2	2	2	2	1										daf-19(m86); daf-12(sa204)	otIs181	wgIs652	20	44	2	2
fkh-8(vlc43)	otIs181	vlcEx361	20	48	2	2	2	2	2	2	2	2										daf-19(m86); daf-12(sa204)	otIs181	wgIs652	20	45	2	2
fkh-8(vlc43)	otIs181	vlcEx361	20	49	2	1	2	2	2	2	2	1										daf-19(m86); daf-12(sa204)	otIs181	wgIs652	20	46	2	2
fkh-8(vlc43)	otIs181	vlcEx361	20	50	2	2	2	2	2	2	2	1										daf-19(m86); daf-12(sa204)	otIs181	wgIs652	20	47	2	2
																						daf-19(m86); daf-12(sa204)	otIs181	wgIs652	20	48	2	2
																						daf-19(m86); daf-12(sa204)	otIs181	wgIs652	20	49	2	1
																						daf-19(m86); daf-12(sa204)	otIs181	wgIs652	20	50	2	2
																						daf-19(m86); daf-12(sa204)	otIs181	wgIs652	20	51	2	2
																						daf-19(m86); daf-12(sa204)	otIs181	wgIs652	20	52	2	2
																						daf-19(m86); daf-12(sa204)	otIs181	wgIs652	20	53	2	2

## Sheet: F4 FS1 pval
A
daf-19(+)
	CEPV			CEPD			ADE			PDE
Background	NO	YES	vs WT	NO	YES	vs WT	NO	YES	vs WT	NO	YES	vs WT
wild type	8	92		7	93		12	88		9	91
fkh-8(vlc43)	5	95	0.567925	2	98	0.16972	6	94	0.215874	12	88	0.645478
B
Class	wildtype MEAN	vlc43 MEAN	wildtype SD	vlc43 SD	F	t
daf-19(+)/DiD	0.500758	0.454545	0.0945841	0.0640837	0.261653	0.217108
Text
fkh-8(+)
	PDE
Background	NO	YES	vs WT
wild type	10	96
daf-19(m86); daf-12(sa204)	9	97	1
