# Supplementary material for: Forkhead transcription factor FKH-8 cooperates with RFX in the direct regulation of sensory cilia in Caenorhabditis elegans
Source: eLife. 2023 Jul 14;12:e89702. doi: 10.7554/eLife.89702 (PMC10393296; doi:10.7554/eLife.89702)
Supplement: Figure 5—source data 1. [file elife-89702-fig5-data1.xlsx]

## Sheet: F5
Neuron	Background	Reporter	Temp. (º C)	Worm	Neuron	Cilium	Cilium Lenght (microns)	Cilium depth (microns)
CEP	wild type	otIs259	20	1	1	1	4.993	NA
CEP	wild type	otIs259	20	1	2	2	4.533	NA
CEP	wild type	otIs259	20	1	3	3	4.912	NA
CEP	wild type	otIs259	20	1	4	4	4.054	NA
CEP	wild type	otIs259	20	4	1	1	4.091	NA
CEP	wild type	otIs259	20	4	2	2	4.118	NA
CEP	wild type	otIs259	20	4	3	3	4.169	NA
CEP	wild type	otIs259	20	4	4	4	4.186	NA
CEP	wild type	otIs259	20	5	1	1	4.418	NA
CEP	wild type	otIs259	20	5	2	2	3.146	NA
CEP	wild type	otIs259	20	5	3	3	4.078	NA
CEP	wild type	otIs259	20	5	4	4	5.5	NA
CEP	wild type	otIs259	20	6	1	1	4.252	NA
CEP	wild type	otIs259	20	6	2	2	3.855	NA
CEP	wild type	otIs259	20	6	3	3	2.312	NA
CEP	wild type	otIs259	20	6	4	4	4.305	NA
CEP	wild type	otIs259	20	7	1	1	4.65	NA
CEP	wild type	otIs259	20	7	2	2	3.165	NA
CEP	wild type	otIs259	20	7	3	3	3.65	NA
CEP	wild type	otIs259	20	7	4	4	3.234	NA
CEP	wild type	otIs259	20	8	1	1	4.172	NA
CEP	wild type	otIs259	20	8	2	2	3.654	NA
CEP	wild type	otIs259	20	8	3	3	3.547	NA
CEP	wild type	otIs259	20	8	4	4	3.34	NA
CEP	wild type	otIs259	20	9	1	1	4.19	NA
CEP	wild type	otIs259	20	9	2	2	3.433	NA
CEP	wild type	otIs259	20	9	3	3	3.174	NA
CEP	wild type	otIs259	20	9	4	4	3.623	NA
CEP	wild type	otIs259	20	10	1	1	4.087	NA
CEP	wild type	otIs259	20	10	2	2	4.252	NA
CEP	wild type	otIs259	20	10	3	3	3.705	NA
CEP	wild type	otIs259	20	10	4	4	3.693	NA
CEP	wild type	otIs259	20	11	1	1	4.373	NA
CEP	wild type	otIs259	20	11	2	2	3.069	NA
CEP	wild type	otIs259	20	11	3	3	3.904	NA
CEP	wild type	otIs259	20	11	4	4	3.376	NA
CEP	wild type	otIs259	20	12	1	1	2.701	NA
CEP	wild type	otIs259	20	12	2	2	3.214	NA
CEP	wild type	otIs259	20	12	3	3	3.766	NA
CEP	wild type	otIs259	20	12	4	4	4.471	NA
CEP	fkh-8(vlc43) II	otIs259	20	4	1	1	3.91	NA
CEP	fkh-8(vlc43) II	otIs259	20	4	2	2	3.342	NA
CEP	fkh-8(vlc43) II	otIs259	20	4	3	3	3.218	NA
CEP	fkh-8(vlc43) II	otIs259	20	4	4	4	3.252	NA
CEP	fkh-8(vlc43) II	otIs259	20	5	1	1	3.016	NA
CEP	fkh-8(vlc43) II	otIs259	20	5	2	2	2.892	NA
CEP	fkh-8(vlc43) II	otIs259	20	5	3	3	3.784	NA
CEP	fkh-8(vlc43) II	otIs259	20	5	4	4	3.374	NA
CEP	fkh-8(vlc43) II	otIs259	20	7	1	1	3.295	NA
CEP	fkh-8(vlc43) II	otIs259	20	7	2	2	2.249	NA
CEP	fkh-8(vlc43) II	otIs259	20	7	3	3	2.982	NA
CEP	fkh-8(vlc43) II	otIs259	20	7	4	4	2.978	NA
CEP	fkh-8(vlc43) II	otIs259	20	8	1	1	2.826	NA
CEP	fkh-8(vlc43) II	otIs259	20	8	2	2	3.109	NA
CEP	fkh-8(vlc43) II	otIs259	20	8	3	3	4.55	NA
CEP	fkh-8(vlc43) II	otIs259	20	8	4	4	4.319	NA
CEP	fkh-8(vlc43) II	otIs259	20	9	1	1	2.884	NA
CEP	fkh-8(vlc43) II	otIs259	20	9	2	2	3.732	NA
CEP	fkh-8(vlc43) II	otIs259	20	9	3	3	4.118	NA
CEP	fkh-8(vlc43) II	otIs259	20	9	4	4	3.693	NA
CEP	fkh-8(vlc43) II	otIs259	20	11	1	1	3.432	NA
CEP	fkh-8(vlc43) II	otIs259	20	11	2	2	2.666	NA
CEP	fkh-8(vlc43) II	otIs259	20	11	3	3	3.159	NA
CEP	fkh-8(vlc43) II	otIs259	20	11	4	4	2.941	NA
CEP	fkh-8(vlc43) II	otIs259	20	12	1	1	4.799	NA
CEP	fkh-8(vlc43) II	otIs259	20	12	2	2	4.904	NA
CEP	fkh-8(vlc43) II	otIs259	20	12	3	3	3.956	NA
CEP	fkh-8(vlc43) II	otIs259	20	12	4	4	3.753	NA
CEP	fkh-8(vlc43) II	otIs259	20	13	1	1	3.9	NA
CEP	fkh-8(vlc43) II	otIs259	20	13	2	2	3.448	NA
CEP	fkh-8(vlc43) II	otIs259	20	13	3	3	3.849	NA
CEP	fkh-8(vlc43) II	otIs259	20	13	4	4	4.446	NA
CEP	fkh-8(vlc43) II	otIs259	20	14	1	1	1.174	NA
CEP	fkh-8(vlc43) II	otIs259	20	14	2	2	2.808	NA
CEP	fkh-8(vlc43) II	otIs259	20	14	3	3	4.274	NA
CEP	fkh-8(vlc43) II	otIs259	20	14	4	4	3.638	NA
CEP	fkh-8(vlc43) II	otIs259	20	15	1	1	4.3	NA
CEP	fkh-8(vlc43) II	otIs259	20	15	2	2	4.278	NA
CEP	fkh-8(vlc43) II	otIs259	20	15	3	3	2.213	NA
CEP	fkh-8(vlc43) II	otIs259	20	15	4	4	4.04	NA
ADF	wild type	zdIs13	20	1	1	1	4.016	NA
ADF	wild type	zdIs13	20	1	1	2	4.932	NA
ADF	wild type	zdIs13	20	2	1	1	4.528	NA
ADF	wild type	zdIs13	20	2	1	2	4.047	NA
ADF	wild type	zdIs13	20	3	1	1	4.079	NA
ADF	wild type	zdIs13	20	3	1	2	4.752	NA
ADF	wild type	zdIs13	20	4	1	1	4.498	NA
ADF	wild type	zdIs13	20	4	1	2	5.538	NA
ADF	wild type	zdIs13	20	4	2	1	5.264	NA
ADF	wild type	zdIs13	20	4	2	2	4.885	NA
ADF	wild type	zdIs13	20	5	1	1	4.151	NA
ADF	wild type	zdIs13	20	5	1	2	4.446	NA
ADF	wild type	zdIs13	20	5	2	1	5.002	NA
ADF	wild type	zdIs13	20	5	2	2	4.595	NA
ADF	wild type	zdIs13	20	6	1	1	4.807	NA
ADF	wild type	zdIs13	20	6	1	2	4.361	NA
ADF	wild type	zdIs13	20	6	2	1	4.126	NA
ADF	wild type	zdIs13	20	6	2	2	3.877	NA
ADF	wild type	zdIs13	20	7	1	1	3.517	NA
ADF	wild type	zdIs13	20	7	1	2	4.126	NA
ADF	wild type	zdIs13	20	7	2	1	4.112	NA
ADF	wild type	zdIs13	20	7	2	2	4.319	NA
ADF	wild type	zdIs13	20	8	1	1	4.631	NA
ADF	wild type	zdIs13	20	8	1	2	4.458	NA
ADF	wild type	zdIs13	20	8	2	1	4.554	NA
ADF	wild type	zdIs13	20	8	2	2	3.526	NA
ADF	wild type	zdIs13	20	9	1	1	3.056	NA
ADF	wild type	zdIs13	20	9	1	2	3.148	NA
ADF	wild type	zdIs13	20	9	2	1	3.362	NA
ADF	wild type	zdIs13	20	9	2	2	3.549	NA
ADF	wild type	zdIs13	20	10	1	1	5.61	NA
ADF	wild type	zdIs13	20	10	1	2	4.515	NA
ADF	fkh-8(vlc43) II	zdIs13	20	2	1	1	5.087	NA
ADF	fkh-8(vlc43) II	zdIs13	20	2	1	2	4.174	NA
ADF	fkh-8(vlc43) II	zdIs13	20	2	2	1	6.72	NA
ADF	fkh-8(vlc43) II	zdIs13	20	2	2	2	5.204	NA
ADF	fkh-8(vlc43) II	zdIs13	20	4	1	1	5.2	NA
ADF	fkh-8(vlc43) II	zdIs13	20	4	1	2	3.651	NA
ADF	fkh-8(vlc43) II	zdIs13	20	5	2	1	6.601	NA
ADF	fkh-8(vlc43) II	zdIs13	20	5	2	2	4.881	NA
ADF	fkh-8(vlc43) II	zdIs13	20	6	1	1	5.421	NA
ADF	fkh-8(vlc43) II	zdIs13	20	6	1	2	5.498	NA
ADF	fkh-8(vlc43) II	zdIs13	20	6	2	1	6.231	NA
ADF	fkh-8(vlc43) II	zdIs13	20	6	2	2	6.094	NA
ADF	fkh-8(vlc43) II	zdIs13	20	7	1	1	6.061	NA
ADF	fkh-8(vlc43) II	zdIs13	20	7	1	2	4.166	NA
ADF	fkh-8(vlc43) II	zdIs13	20	7	2	1	4.335	NA
ADF	fkh-8(vlc43) II	zdIs13	20	7	2	2	3.722	NA
ADF	fkh-8(vlc43) II	zdIs13	20	8	1	1	5.32	NA
ADF	fkh-8(vlc43) II	zdIs13	20	8	1	2	5.204	NA
ADF	fkh-8(vlc43) II	zdIs13	20	8	2	1	5.588	NA
ADF	fkh-8(vlc43) II	zdIs13	20	8	2	2	5.743	NA
ADF	fkh-8(vlc43) II	zdIs13	20	9	2	1	5.225	NA
ADF	fkh-8(vlc43) II	zdIs13	20	9	2	2	6.127	NA
ADF	fkh-8(vlc43) II	zdIs13	20	10	1	1	4.511	NA
ADF	fkh-8(vlc43) II	zdIs13	20	10	1	2	6.192	NA
ADF	fkh-8(vlc43) II	zdIs13	20	10	2	1	3.369	NA
ADF	fkh-8(vlc43) II	zdIs13	20	10	2	2	3.037	NA
ADF	fkh-8(vlc43) II	zdIs13	20	11	1	1	4.468	NA
ADF	fkh-8(vlc43) II	zdIs13	20	11	1	2	4.453	NA
ADF	fkh-8(vlc43) II	zdIs13	20	12	2	1	4.837	NA
ADF	fkh-8(vlc43) II	zdIs13	20	12	2	2	3.914	NA
ADF	fkh-8(vlc43) II	zdIs13	20	13	1	1	4.534	NA
ADF	fkh-8(vlc43) II	zdIs13	20	13	1	2	4.179	NA
AWB	wild type	kyIs104	20	1	1	1	5.901	NA
AWB	wild type	kyIs104	20	1	1	2	6.011	NA
AWB	wild type	kyIs104	20	2	1	1	6.84	NA
AWB	wild type	kyIs104	20	2	1	2	5.855	NA
AWB	wild type	kyIs104	20	2	2	1	5.844	NA
AWB	wild type	kyIs104	20	2	2	2	8.988	NA
AWB	wild type	kyIs104	20	3	1	1	6.24	NA
AWB	wild type	kyIs104	20	3	1	2	6.77	NA
AWB	wild type	kyIs104	20	3	2	1	5.076	NA
AWB	wild type	kyIs104	20	3	2	2	7.993	NA
AWB	wild type	kyIs104	20	4	1	1	6.546	NA
AWB	wild type	kyIs104	20	4	1	2	6.299	NA
AWB	wild type	kyIs104	20	5	1	1	7.313	NA
AWB	wild type	kyIs104	20	5	1	2	6.432	NA
AWB	wild type	kyIs104	20	5	2	1	3.584	NA
AWB	wild type	kyIs104	20	5	2	2	7.452	NA
AWB	wild type	kyIs104	20	6	1	1	7.252	NA
AWB	wild type	kyIs104	20	6	1	2	6.275	NA
AWB	wild type	kyIs104	20	6	2	1	6.762	NA
AWB	wild type	kyIs104	20	6	2	2	5.088	NA
AWB	wild type	kyIs104	20	8	1	1	3.968	NA
AWB	wild type	kyIs104	20	8	1	2	5.799	NA
AWB	wild type	kyIs104	20	9	1	1	5.495	NA
AWB	wild type	kyIs104	20	9	1	2	3.492	NA
AWB	wild type	kyIs104	20	10	1	1	5.538	NA
AWB	wild type	kyIs104	20	10	1	2	4.112	NA
AWB	wild type	kyIs104	20	10	2	1	5.423	NA
AWB	wild type	kyIs104	20	10	2	2	6.501	NA
AWB	wild type	kyIs104	20	11	1	1	7.487	NA
AWB	wild type	kyIs104	20	11	1	2	7.632	NA
AWB	wild type	kyIs104	20	12	1	1	4.946	NA
AWB	wild type	kyIs104	20	12	1	2	5.751	NA
AWB	wild type	kyIs104	20	13	1	1	4.846	NA
AWB	wild type	kyIs104	20	13	1	2	6.81	NA
AWB	wild type	kyIs104	20	15	1	1	4.958	NA
AWB	wild type	kyIs104	20	15	1	2	6.194	NA
AWB	wild type	kyIs104	20	16	1	1	5.091	NA
AWB	wild type	kyIs104	20	16	1	2	6.389	NA
AWB	wild type	kyIs104	20	16	2	1	8.08	NA
AWB	wild type	kyIs104	20	16	2	2	7.848	NA
AWB	fkh-8(vlc43) II	kyIs104	20	1	1	1	4.05	NA
AWB	fkh-8(vlc43) II	kyIs104	20	1	1	2	4.217	NA
AWB	fkh-8(vlc43) II	kyIs104	20	2	1	1	5.434	NA
AWB	fkh-8(vlc43) II	kyIs104	20	2	1	2	4.997	NA
AWB	fkh-8(vlc43) II	kyIs104	20	4	1	1	5.428	NA
AWB	fkh-8(vlc43) II	kyIs104	20	4	1	2	6.334	NA
AWB	fkh-8(vlc43) II	kyIs104	20	5	1	1	5.84	NA
AWB	fkh-8(vlc43) II	kyIs104	20	5	1	2	5.251	NA
AWB	fkh-8(vlc43) II	kyIs104	20	6	1	1	5.314	NA
AWB	fkh-8(vlc43) II	kyIs104	20	6	1	2	5.37	NA
AWB	fkh-8(vlc43) II	kyIs104	20	9	1	1	4.791	NA
AWB	fkh-8(vlc43) II	kyIs104	20	9	1	2	4.856	NA
AWB	fkh-8(vlc43) II	kyIs104	20	10	1	1	6.327	NA
AWB	fkh-8(vlc43) II	kyIs104	20	10	1	2	5.04	NA
AWB	fkh-8(vlc43) II	kyIs104	20	11	1	1	7.092	NA
AWB	fkh-8(vlc43) II	kyIs104	20	11	1	2	5.686	NA
AWB	fkh-8(vlc43) II	kyIs104	20	12	1	1	6.076	NA
AWB	fkh-8(vlc43) II	kyIs104	20	12	1	2	5.1	NA
AWB	fkh-8(vlc43) II	kyIs104	20	13	1	1	5.173	NA
AWB	fkh-8(vlc43) II	kyIs104	20	13	1	2	3.704	NA
AWB	fkh-8(vlc43) II	kyIs104	20	14	1	1	4.334	NA
AWB	fkh-8(vlc43) II	kyIs104	20	14	1	2	5.201	NA
AWB	fkh-8(vlc43) II	kyIs104	20	14	2	1	6.183	NA
AWB	fkh-8(vlc43) II	kyIs104	20	14	2	2	5.101	NA
AWB	fkh-8(vlc43) II	kyIs104	20	15	1	1	4.03	NA
AWB	fkh-8(vlc43) II	kyIs104	20	15	1	2	4.593	NA
AWB	fkh-8(vlc43) II	kyIs104	20	16	1	1	4.67	NA
AWB	fkh-8(vlc43) II	kyIs104	20	16	1	2	6.104	NA
AWB	fkh-8(vlc43) II	kyIs104	20	17	1	1	5.662	NA
AWB	fkh-8(vlc43) II	kyIs104	20	17	1	2	4.843	NA
AWB	fkh-8(vlc43) II	kyIs104	20	19	1	1	5.482	NA
AWB	fkh-8(vlc43) II	kyIs104	20	19	1	2	6.749	NA
AWB	fkh-8(vlc43) II	kyIs104	20	20	1	1	4.18	NA
AWB	fkh-8(vlc43) II	kyIs104	20	20	1	2	5.731	NA
AWB	fkh-8(vlc43) II	kyIs104	20	22	1	1	6.048	NA
AWB	fkh-8(vlc43) II	kyIs104	20	22	1	2	6.301	NA
AWB	fkh-8(vlc43) II	kyIs104	20	22	2	1	6.187	NA
AWB	fkh-8(vlc43) II	kyIs104	20	22	2	2	6.22	NA
AWB	fkh-8(vlc43) II	kyIs104	20	23	1	1	3.958	NA
AWB	fkh-8(vlc43) II	kyIs104	20	23	1	2	5.182	NA
AWA	wild type	pkIs583	20	1	1&2	1&2	NA	13.2
AWA	wild type	pkIs583	20	2	1&2	1&2	NA	11.1
AWA	wild type	pkIs583	20	4	1&2	1&2	NA	11.7
AWA	wild type	pkIs583	20	5	1&2	1&2	NA	12.3
AWA	wild type	pkIs583	20	7	1&2	1&2	NA	9
AWA	wild type	pkIs583	20	10	1&2	1&2	NA	10.8
AWA	wild type	pkIs583	20	11	1&2	1&2	NA	10.2
AWA	fkh-8(vlc43) II	pkIs583	20	2	1&2	1&2	NA	8.7
AWA	fkh-8(vlc43) II	pkIs583	20	5	1&2	1&2	NA	9.3
AWA	fkh-8(vlc43) II	pkIs583	20	7	1&2	1&2	NA	11.4
AWA	fkh-8(vlc43) II	pkIs583	20	9	1&2	1&2	NA	9
AWA	fkh-8(vlc43) II	pkIs583	20	11	1&2	1&2	NA	9
AWA	fkh-8(vlc43) II	pkIs583	20	12	1&2	1&2	NA	7.8
AWA	fkh-8(vlc43) II	pkIs583	20	13	1&2	1&2	NA	9.9

## Sheet: F5 pval
Neuron	wildtype MEAN	vlc43 MEAN	wildtype SD	vlc43 SD	F	t
CEP	3.88412	3.48753	0.638102	0.756992	0.290227	0.0132977
ADF	4.32459	4.99209	0.630528	0.95672	0.0231472	0.00174559
AWB	6.12203	5.32097	1.24883	0.819587	0.00998321	0.00116658
AWA	11.1857	9.3	1.38254	1.1225	0.625561	0.0159984

## Sheet: F5 FS1
Track	Strain	Reporter	Background	Temp. (º C)	Trial	Neuron	Worm	Neuron	Cilium	Lenght (microns)	Notes
1	NFB1756	otIs259[dat-1::GFP + rol-6(su1006)]	wild type	20	1	CEP	1	1	1	4.649
2	NFB1756	otIs259[dat-1::GFP + rol-6(su1006)]	wild type	20	1	CEP	1	2	2	3.672
3	NFB1756	otIs259[dat-1::GFP + rol-6(su1006)]	wild type	20	1	CEP	1	3	3	4.276
4	NFB1756	otIs259[dat-1::GFP + rol-6(su1006)]	wild type	20	1	CEP	1	4	4	5.027
5	NFB1756	otIs259[dat-1::GFP + rol-6(su1006)]	wild type	20	1	CEP	2	1	1	4.539
6	NFB1756	otIs259[dat-1::GFP + rol-6(su1006)]	wild type	20	1	CEP	2	2	2	3.873
7	NFB1756	otIs259[dat-1::GFP + rol-6(su1006)]	wild type	20	1	CEP	2	3	3	4.51
8	NFB1756	otIs259[dat-1::GFP + rol-6(su1006)]	wild type	20	1	CEP	2	4	4	3.512
9	NFB1756	otIs259[dat-1::GFP + rol-6(su1006)]	wild type	20	1	CEP	3	1	1	4.572
10	NFB1756	otIs259[dat-1::GFP + rol-6(su1006)]	wild type	20	1	CEP	3	2	2	3.111
11	NFB1756	otIs259[dat-1::GFP + rol-6(su1006)]	wild type	20	1	CEP	3	3	3	5.249
12	NFB1756	otIs259[dat-1::GFP + rol-6(su1006)]	wild type	20	1	CEP	3	4	4	4.963
13	NFB1756	otIs259[dat-1::GFP + rol-6(su1006)]	wild type	20	1	CEP	4	1	1	3.217
14	NFB1756	otIs259[dat-1::GFP + rol-6(su1006)]	wild type	20	1	CEP	4	2	2	4.24
15	NFB1756	otIs259[dat-1::GFP + rol-6(su1006)]	wild type	20	1	CEP	4	3	3	3.557
16	NFB1756	otIs259[dat-1::GFP + rol-6(su1006)]	wild type	20	1	CEP	4	4	4	3.647
17	NFB1756	otIs259[dat-1::GFP + rol-6(su1006)]	wild type	20	1	CEP	5	1	1	3.769
18	NFB1756	otIs259[dat-1::GFP + rol-6(su1006)]	wild type	20	1	CEP	5	2	2	2.934
19	NFB1756	otIs259[dat-1::GFP + rol-6(su1006)]	wild type	20	1	CEP	5	3	3	2.874
20	NFB1756	otIs259[dat-1::GFP + rol-6(su1006)]	wild type	20	1	CEP	5	4	4	4.049
21	NFB1756	otIs259[dat-1::GFP + rol-6(su1006)]	wild type	20	1	CEP	6	1	1	3.968
22	NFB1756	otIs259[dat-1::GFP + rol-6(su1006)]	wild type	20	1	CEP	6	2	2	3.816
23	NFB1756	otIs259[dat-1::GFP + rol-6(su1006)]	wild type	20	1	CEP	6	3	3	4.617
24	NFB1756	otIs259[dat-1::GFP + rol-6(su1006)]	wild type	20	1	CEP	6	4	4	3.794
25	NFB2447	otIs259[dat-1::GFP + rol-6(su1006)]	fkh-8(vlc43) II	20	1	CEP	1	1	1	1.43
26	NFB2447	otIs259[dat-1::GFP + rol-6(su1006)]	fkh-8(vlc43) II	20	1	CEP	1	2	2	3.624
27	NFB2447	otIs259[dat-1::GFP + rol-6(su1006)]	fkh-8(vlc43) II	20	1	CEP	1	3	3	4.044
28	NFB2447	otIs259[dat-1::GFP + rol-6(su1006)]	fkh-8(vlc43) II	20	1	CEP	1	4	4	3.884
29	NFB2447	otIs259[dat-1::GFP + rol-6(su1006)]	fkh-8(vlc43) II	20	1	CEP	2	1	1	3.782
30	NFB2447	otIs259[dat-1::GFP + rol-6(su1006)]	fkh-8(vlc43) II	20	1	CEP	2	2	2	3.935
31	NFB2447	otIs259[dat-1::GFP + rol-6(su1006)]	fkh-8(vlc43) II	20	1	CEP	2	3	3	NA	Fluorescence interrupted
32	NFB2447	otIs259[dat-1::GFP + rol-6(su1006)]	fkh-8(vlc43) II	20	1	CEP	2	4	4	1.967
33	NFB2447	otIs259[dat-1::GFP + rol-6(su1006)]	fkh-8(vlc43) II	20	1	CEP	3	1	1	3.281
34	NFB2447	otIs259[dat-1::GFP + rol-6(su1006)]	fkh-8(vlc43) II	20	1	CEP	3	2	2	4.881
35	NFB2447	otIs259[dat-1::GFP + rol-6(su1006)]	fkh-8(vlc43) II	20	1	CEP	3	3	3	4.851
36	NFB2447	otIs259[dat-1::GFP + rol-6(su1006)]	fkh-8(vlc43) II	20	1	CEP	3	4	4	2.402
37	NFB2447	otIs259[dat-1::GFP + rol-6(su1006)]	fkh-8(vlc43) II	20	1	CEP	4	1	1	0.927
38	NFB2447	otIs259[dat-1::GFP + rol-6(su1006)]	fkh-8(vlc43) II	20	1	CEP	4	2	2	3.888
39	NFB2447	otIs259[dat-1::GFP + rol-6(su1006)]	fkh-8(vlc43) II	20	1	CEP	4	3	3	4.423
40	NFB2447	otIs259[dat-1::GFP + rol-6(su1006)]	fkh-8(vlc43) II	20	1	CEP	4	4	4	4.253
41	NFB2447	otIs259[dat-1::GFP + rol-6(su1006)]	fkh-8(vlc43) II	20	1	CEP	5	1	1	3.843
42	NFB2447	otIs259[dat-1::GFP + rol-6(su1006)]	fkh-8(vlc43) II	20	1	CEP	5	2	2	0
43	NFB2447	otIs259[dat-1::GFP + rol-6(su1006)]	fkh-8(vlc43) II	20	1	CEP	5	3	3	4.025
44	NFB2447	otIs259[dat-1::GFP + rol-6(su1006)]	fkh-8(vlc43) II	20	1	CEP	5	4	4	4.073
45	NFB1756	otIs259[dat-1::GFP + rol-6(su1006)]	wild type	20	2	CEP	7	1	1	3.172
46	NFB1756	otIs259[dat-1::GFP + rol-6(su1006)]	wild type	20	2	CEP	7	2	2	2.831
47	NFB1756	otIs259[dat-1::GFP + rol-6(su1006)]	wild type	20	2	CEP	7	3	3	4.559
48	NFB1756	otIs259[dat-1::GFP + rol-6(su1006)]	wild type	20	2	CEP	7	4	4	4.871
49	NFB1756	otIs259[dat-1::GFP + rol-6(su1006)]	wild type	20	2	CEP	8	1	1	4.79
50	NFB1756	otIs259[dat-1::GFP + rol-6(su1006)]	wild type	20	2	CEP	8	2	2	2.209
51	NFB1756	otIs259[dat-1::GFP + rol-6(su1006)]	wild type	20	2	CEP	8	3	3	4.754
52	NFB1756	otIs259[dat-1::GFP + rol-6(su1006)]	wild type	20	2	CEP	8	4	4	3.778
53	NFB1756	otIs259[dat-1::GFP + rol-6(su1006)]	wild type	20	2	CEP	9	1	1	4.059
54	NFB1756	otIs259[dat-1::GFP + rol-6(su1006)]	wild type	20	2	CEP	9	2	2	4.545
55	NFB1756	otIs259[dat-1::GFP + rol-6(su1006)]	wild type	20	2	CEP	9	3	3	1.684
56	NFB1756	otIs259[dat-1::GFP + rol-6(su1006)]	wild type	20	2	CEP	9	4	4	2.425
57	NFB1756	otIs259[dat-1::GFP + rol-6(su1006)]	wild type	20	2	CEP	10	1	1	3.178
58	NFB1756	otIs259[dat-1::GFP + rol-6(su1006)]	wild type	20	2	CEP	10	2	2	5.473
59	NFB1756	otIs259[dat-1::GFP + rol-6(su1006)]	wild type	20	2	CEP	10	3	3	4.239
60	NFB1756	otIs259[dat-1::GFP + rol-6(su1006)]	wild type	20	2	CEP	10	4	4	5.207
61	NFB1756	otIs259[dat-1::GFP + rol-6(su1006)]	wild type	20	2	CEP	11	1	1	4.606
62	NFB1756	otIs259[dat-1::GFP + rol-6(su1006)]	wild type	20	2	CEP	11	2	2	3.721
63	NFB1756	otIs259[dat-1::GFP + rol-6(su1006)]	wild type	20	2	CEP	11	3	3	1.208
64	NFB1756	otIs259[dat-1::GFP + rol-6(su1006)]	wild type	20	2	CEP	11	4	4	4.145
65	NFB1756	otIs259[dat-1::GFP + rol-6(su1006)]	wild type	20	2	CEP	12	1	1	3.032
66	NFB1756	otIs259[dat-1::GFP + rol-6(su1006)]	wild type	20	2	CEP	12	2	2	4.524
67	NFB1756	otIs259[dat-1::GFP + rol-6(su1006)]	wild type	20	2	CEP	12	3	3	2.662
68	NFB1756	otIs259[dat-1::GFP + rol-6(su1006)]	wild type	20	2	CEP	12	4	4	3.833
69	NFB1756	otIs259[dat-1::GFP + rol-6(su1006)]	wild type	20	2	CEP	13	1	1	3.027
70	NFB1756	otIs259[dat-1::GFP + rol-6(su1006)]	wild type	20	2	CEP	13	2	2	3.917
71	NFB1756	otIs259[dat-1::GFP + rol-6(su1006)]	wild type	20	2	CEP	13	3	3	1.413
72	NFB1756	otIs259[dat-1::GFP + rol-6(su1006)]	wild type	20	2	CEP	13	4	4	3.067
73	NFB2447	otIs259[dat-1::GFP + rol-6(su1006)]	fkh-8(vlc43) II	20	2	CEP	6	1	1	3.529
74	NFB2447	otIs259[dat-1::GFP + rol-6(su1006)]	fkh-8(vlc43) II	20	2	CEP	6	2	2	NA	Unusual bifid structure
75	NFB2447	otIs259[dat-1::GFP + rol-6(su1006)]	fkh-8(vlc43) II	20	2	CEP	6	3	3	3.468
76	NFB2447	otIs259[dat-1::GFP + rol-6(su1006)]	fkh-8(vlc43) II	20	2	CEP	6	4	4	4.767
77	NFB2447	otIs259[dat-1::GFP + rol-6(su1006)]	fkh-8(vlc43) II	20	2	CEP	7	1	1	3.819
78	NFB2447	otIs259[dat-1::GFP + rol-6(su1006)]	fkh-8(vlc43) II	20	2	CEP	7	2	2	3.615
79	NFB2447	otIs259[dat-1::GFP + rol-6(su1006)]	fkh-8(vlc43) II	20	2	CEP	7	3	3	4.066
80	NFB2447	otIs259[dat-1::GFP + rol-6(su1006)]	fkh-8(vlc43) II	20	2	CEP	7	4	4	3.846
81	NFB2447	otIs259[dat-1::GFP + rol-6(su1006)]	fkh-8(vlc43) II	20	2	CEP	8	1	1	3.259
82	NFB2447	otIs259[dat-1::GFP + rol-6(su1006)]	fkh-8(vlc43) II	20	2	CEP	8	2	2	3.829
83	NFB2447	otIs259[dat-1::GFP + rol-6(su1006)]	fkh-8(vlc43) II	20	2	CEP	8	3	3	1.358
84	NFB2447	otIs259[dat-1::GFP + rol-6(su1006)]	fkh-8(vlc43) II	20	2	CEP	8	4	4	3.883
85	NFB2447	otIs259[dat-1::GFP + rol-6(su1006)]	fkh-8(vlc43) II	20	2	CEP	9	1	1	3.787
86	NFB2447	otIs259[dat-1::GFP + rol-6(su1006)]	fkh-8(vlc43) II	20	2	CEP	9	2	2	3.095
87	NFB2447	otIs259[dat-1::GFP + rol-6(su1006)]	fkh-8(vlc43) II	20	2	CEP	9	3	3	3.818
88	NFB2447	otIs259[dat-1::GFP + rol-6(su1006)]	fkh-8(vlc43) II	20	2	CEP	9	4	4	3.505
89	NFB2447	otIs259[dat-1::GFP + rol-6(su1006)]	fkh-8(vlc43) II	20	2	CEP	10	1	1	1.459
90	NFB2447	otIs259[dat-1::GFP + rol-6(su1006)]	fkh-8(vlc43) II	20	2	CEP	10	2	2	NA	Fluorescence interrupted
91	NFB2447	otIs259[dat-1::GFP + rol-6(su1006)]	fkh-8(vlc43) II	20	2	CEP	10	3	3	3.368
92	NFB2447	otIs259[dat-1::GFP + rol-6(su1006)]	fkh-8(vlc43) II	20	2	CEP	10	4	4	3.621
93	NFB2447	otIs259[dat-1::GFP + rol-6(su1006)]	fkh-8(vlc43) II	20	2	CEP	11	1	1	4.355
94	NFB2447	otIs259[dat-1::GFP + rol-6(su1006)]	fkh-8(vlc43) II	20	2	CEP	11	2	2	3.448
95	NFB2447	otIs259[dat-1::GFP + rol-6(su1006)]	fkh-8(vlc43) II	20	2	CEP	11	3	3	0.795
96	NFB2447	otIs259[dat-1::GFP + rol-6(su1006)]	fkh-8(vlc43) II	20	2	CEP	11	4	4	3.69
97	NFB2447	otIs259[dat-1::GFP + rol-6(su1006)]	fkh-8(vlc43) II	20	2	CEP	12	1	1	3.94
98	NFB2447	otIs259[dat-1::GFP + rol-6(su1006)]	fkh-8(vlc43) II	20	2	CEP	12	2	2	3.698
99	NFB2447	otIs259[dat-1::GFP + rol-6(su1006)]	fkh-8(vlc43) II	20	2	CEP	12	3	3	1.371
100	NFB2447	otIs259[dat-1::GFP + rol-6(su1006)]	fkh-8(vlc43) II	20	2	CEP	12	4	4	3.916
101	NFB2447	otIs259[dat-1::GFP + rol-6(su1006)]	fkh-8(vlc43) II	20	2	CEP	13	1	1	4.349
102	NFB2447	otIs259[dat-1::GFP + rol-6(su1006)]	fkh-8(vlc43) II	20	2	CEP	13	2	2	0
103	NFB2447	otIs259[dat-1::GFP + rol-6(su1006)]	fkh-8(vlc43) II	20	2	CEP	13	3	3	3.061
104	NFB2447	otIs259[dat-1::GFP + rol-6(su1006)]	fkh-8(vlc43) II	20	2	CEP	13	4	4	3.763
105	NFB2447	otIs259[dat-1::GFP + rol-6(su1006)]	fkh-8(vlc43) II	20	2	CEP	14	1	1	3.127
106	NFB2447	otIs259[dat-1::GFP + rol-6(su1006)]	fkh-8(vlc43) II	20	2	CEP	14	2	2	2.741
107	NFB2447	otIs259[dat-1::GFP + rol-6(su1006)]	fkh-8(vlc43) II	20	2	CEP	14	3	3	0
108	NFB2447	otIs259[dat-1::GFP + rol-6(su1006)]	fkh-8(vlc43) II	20	2	CEP	14	4	4	1.668
109	NFB2447	otIs259[dat-1::GFP + rol-6(su1006)]	fkh-8(vlc43) II	20	2	CEP	15	1	1	4.167
110	NFB2447	otIs259[dat-1::GFP + rol-6(su1006)]	fkh-8(vlc43) II	20	2	CEP	15	2	2	3.29
111	NFB2447	otIs259[dat-1::GFP + rol-6(su1006)]	fkh-8(vlc43) II	20	2	CEP	15	3	3	2.905
112	NFB2447	otIs259[dat-1::GFP + rol-6(su1006)]	fkh-8(vlc43) II	20	2	CEP	15	4	4	4.247
113	NFB2448	zdIs13[tph-1p::GFP] IV	wild type	20	1	ADF	6	1	1	5.939
114	NFB2449	zdIs13[tph-1p::GFP] IV	wild type	20	1	ADF	6	1	2	7.095
115	NFB2450	zdIs13[tph-1p::GFP] IV	wild type	20	1	ADF	6	2	1	7.718
116	NFB2451	zdIs13[tph-1p::GFP] IV	wild type	20	1	ADF	6	2	2	8.218
117	NFB2452	zdIs13[tph-1p::GFP] IV	wild type	20	1	ADF	7	1	1	5.768
118	NFB2453	zdIs13[tph-1p::GFP] IV	wild type	20	1	ADF	7	2	2	5.592
119	NFB2454	zdIs13[tph-1p::GFP] IV	wild type	20	1	ADF	8	1	1	10.024
120	NFB2455	zdIs13[tph-1p::GFP] IV	wild type	20	1	ADF	8	1	2	11.167
121	NFB2456	zdIs13[tph-1p::GFP] IV	wild type	20	1	ADF	8	2	1	6.284
122	NFB2457	zdIs13[tph-1p::GFP] IV	wild type	20	1	ADF	8	2	2	6.1
123	NFB2458	zdIs13[tph-1p::GFP] IV	wild type	20	1	ADF	9	1	1	7.425
124	NFB2459	zdIs13[tph-1p::GFP] IV	wild type	20	1	ADF	9	1	2	7.417
125	NFB2460	zdIs13[tph-1p::GFP] IV	wild type	20	1	ADF	9	2	1	5.877
126	NFB2461	zdIs13[tph-1p::GFP] IV	wild type	20	1	ADF	9	2	2	6.244
127	NFB2462	zdIs13[tph-1p::GFP] IV	wild type	20	1	ADF	10	1	1	5.091
128	NFB2463	zdIs13[tph-1p::GFP] IV	wild type	20	1	ADF	10	1	2	5.59
129	NFB2464	zdIs13[tph-1p::GFP] IV	wild type	20	1	ADF	10	2	1	3.658
130	NFB2465	zdIs13[tph-1p::GFP] IV	wild type	20	1	ADF	10	2	2	4.431
131	NFB2466	zdIs13[tph-1p::GFP] IV	wild type	20	1	ADF	11	1	1	5.649
132	NFB2467	zdIs13[tph-1p::GFP] IV	wild type	20	1	ADF	11	1	2	4.745
133	NFB2468	zdIs13[tph-1p::GFP] IV	wild type	20	1	ADF	11	2	1	3.588
134	NFB2469	zdIs13[tph-1p::GFP] IV	wild type	20	1	ADF	11	2	2	5.493
135	NFB2470	zdIs13[tph-1p::GFP] IV	wild type	20	1	ADF	12	1	1	8.701
136	NFB2471	zdIs13[tph-1p::GFP] IV	wild type	20	1	ADF	12	1	2	5.07
137	NFB2472	zdIs13[tph-1p::GFP] IV	wild type	20	1	ADF	12	2	1	8.697
138	NFB2473	zdIs13[tph-1p::GFP] IV	wild type	20	1	ADF	12	2	2	8.707
139	NFB2474	zdIs13[tph-1p::GFP] IV	wild type	20	1	ADF	13	1	1	7.998
140	NFB2475	zdIs13[tph-1p::GFP] IV	wild type	20	1	ADF	13	1	2	6.118
141	NFB2476	zdIs13[tph-1p::GFP] IV	wild type	20	1	ADF	13	2	1	7.532
142	NFB2448	zdIs13[tph-1p::GFP] IV	wild type	20	1	ADF	13	2	2	6.688
143	NFB2449	zdIs13[tph-1p::GFP] IV	fkh-8(vlc43) II	20	1	ADF	17	1	1	4.434
144	NFB2449	zdIs13[tph-1p::GFP] IV	fkh-8(vlc43) II	20	1	ADF	17	1	2	4.14
145	NFB2449	zdIs13[tph-1p::GFP] IV	fkh-8(vlc43) II	20	1	ADF	16	1	1	6.186
146	NFB2449	zdIs13[tph-1p::GFP] IV	fkh-8(vlc43) II	20	1	ADF	16	1	2	9.466
147	NFB2449	zdIs13[tph-1p::GFP] IV	fkh-8(vlc43) II	20	1	ADF	15	1	1	6.302
148	NFB2449	zdIs13[tph-1p::GFP] IV	fkh-8(vlc43) II	20	1	ADF	15	1	2	6.064
149	NFB2449	zdIs13[tph-1p::GFP] IV	fkh-8(vlc43) II	20	1	ADF	14	1	1	3.788
150	NFB2449	zdIs13[tph-1p::GFP] IV	fkh-8(vlc43) II	20	1	ADF	14	1	2	4.189
151	NFB2449	zdIs13[tph-1p::GFP] IV	fkh-8(vlc43) II	20	1	ADF	14	2	1	4.001
152	NFB2449	zdIs13[tph-1p::GFP] IV	fkh-8(vlc43) II	20	1	ADF	14	2	2	3.949
153	NFB2449	zdIs13[tph-1p::GFP] IV	fkh-8(vlc43) II	20	1	ADF	13	1	1	4.434
154	NFB2449	zdIs13[tph-1p::GFP] IV	fkh-8(vlc43) II	20	1	ADF	13	1	2	4.276
155	NFB2449	zdIs13[tph-1p::GFP] IV	fkh-8(vlc43) II	20	1	ADF	13	1	1	4.141
156	NFB2449	zdIs13[tph-1p::GFP] IV	fkh-8(vlc43) II	20	1	ADF	13	2	2	4.173
157	NFB2449	zdIs13[tph-1p::GFP] IV	fkh-8(vlc43) II	20	1	ADF	11	2	1	6.529
158	NFB2449	zdIs13[tph-1p::GFP] IV	fkh-8(vlc43) II	20	1	ADF	11	2	2	6.019
159	NFB2449	zdIs13[tph-1p::GFP] IV	fkh-8(vlc43) II	20	1	ADF	11	1	1	6.526
160	NFB2449	zdIs13[tph-1p::GFP] IV	fkh-8(vlc43) II	20	1	ADF	11	1	2	6.38
161	NFB2449	zdIs13[tph-1p::GFP] IV	fkh-8(vlc43) II	20	1	ADF	8	1	1	5.274
162	NFB2449	zdIs13[tph-1p::GFP] IV	fkh-8(vlc43) II	20	1	ADF	8	1	2	5.202
163	NFB2449	zdIs13[tph-1p::GFP] IV	fkh-8(vlc43) II	20	1	ADF	8	2	1	4.064
164	NFB2449	zdIs13[tph-1p::GFP] IV	fkh-8(vlc43) II	20	1	ADF	8	2	2	4.773
165	NFB2449	zdIs13[tph-1p::GFP] IV	fkh-8(vlc43) II	20	1	ADF	6	1	1	3.923
166	NFB2449	zdIs13[tph-1p::GFP] IV	fkh-8(vlc43) II	20	1	ADF	6	1	2	3.929
167	NFB2449	zdIs13[tph-1p::GFP] IV	fkh-8(vlc43) II	20	1	ADF	6	2	1	5.88
168	NFB2449	zdIs13[tph-1p::GFP] IV	fkh-8(vlc43) II	20	1	ADF	6	2	2	4.051
169	NFB2449	zdIs13[tph-1p::GFP] IV	fkh-8(vlc43) II	20	1	ADF	5	1	1	5.659
170	NFB2449	zdIs13[tph-1p::GFP] IV	fkh-8(vlc43) II	20	1	ADF	5	1	2	6.94
171	NFB2449	zdIs13[tph-1p::GFP] IV	fkh-8(vlc43) II	20	1	ADF	5	2	1	6.265
172	NFB2449	zdIs13[tph-1p::GFP] IV	fkh-8(vlc43) II	20	1	ADF	5	2	2	7.021
173	NFB2629	kyIs104 [str-1p::GFP] X	wild type	20	1	AWB	25	1	1	10.784	Long
174	NFB2629	kyIs104 [str-1p::GFP] X	wild type	20	1	AWB	25	1	2	5.585	Short
175	NFB2629	kyIs104 [str-1p::GFP] X	wild type	20	1	AWB	24	1	1	6.069	Short
176	NFB2629	kyIs104 [str-1p::GFP] X	wild type	20	1	AWB	24	1	2	6.855	Long
177	NFB2629	kyIs104 [str-1p::GFP] X	wild type	20	1	AWB	24	2	1	11.626	Long
178	NFB2629	kyIs104 [str-1p::GFP] X	wild type	20	1	AWB	24	2	2	8.494	Short
179	NFB2629	kyIs104 [str-1p::GFP] X	wild type	20	1	AWB	23	1	1	4.3	Short
180	NFB2629	kyIs104 [str-1p::GFP] X	wild type	20	1	AWB	23	1	2	7.868	Long
181	NFB2629	kyIs104 [str-1p::GFP] X	wild type	20	1	AWB	22	1	1	6.982	Long
182	NFB2629	kyIs104 [str-1p::GFP] X	wild type	20	1	AWB	22	1	2	5.101	Short
183	NFB2629	kyIs104 [str-1p::GFP] X	wild type	20	1	AWB	22	2	1	8.367	Long
184	NFB2629	kyIs104 [str-1p::GFP] X	wild type	20	1	AWB	22	2	2	5.005	Short
185	NFB2629	kyIs104 [str-1p::GFP] X	wild type	20	1	AWB	21	1	1	9.213	Long
186	NFB2629	kyIs104 [str-1p::GFP] X	wild type	20	1	AWB	21	1	2	3.439	Short
187	NFB2629	kyIs104 [str-1p::GFP] X	wild type	20	1	AWB	20	1	1	8.914	Short
188	NFB2629	kyIs104 [str-1p::GFP] X	wild type	20	1	AWB	20	1	2	10.697	Long
189	NFB2629	kyIs104 [str-1p::GFP] X	wild type	20	1	AWB	19	1	1	7.18	Short
190	NFB2629	kyIs104 [str-1p::GFP] X	wild type	20	1	AWB	19	1	2	9.829	Long
191	NFB2629	kyIs104 [str-1p::GFP] X	wild type	20	1	AWB	19	2	1	8.493	Long
192	NFB2629	kyIs104 [str-1p::GFP] X	wild type	20	1	AWB	19	2	2	5.363	Short
193	NFB2629	kyIs104 [str-1p::GFP] X	wild type	20	1	AWB	18	1	1	5.236	Short
194	NFB2629	kyIs104 [str-1p::GFP] X	wild type	20	1	AWB	18	1	2	11.118	Long
195	NFB2629	kyIs104 [str-1p::GFP] X	wild type	20	1	AWB	18	2	1	9.961	Short
196	NFB2629	kyIs104 [str-1p::GFP] X	wild type	20	1	AWB	18	2	2	12.244	Long
197	NFB2629	kyIs104 [str-1p::GFP] X	wild type	20	1	AWB	17	1	1	10.455	Long
198	NFB2629	kyIs104 [str-1p::GFP] X	wild type	20	1	AWB	17	1	2	8.479	Short
199	NFB2629	kyIs104 [str-1p::GFP] X	wild type	20	1	AWB	15	1	1	9.408	Long
200	NFB2629	kyIs104 [str-1p::GFP] X	wild type	20	1	AWB	15	1	2	7.509	Short
201	NFB2629	kyIs104 [str-1p::GFP] X	wild type	20	1	AWB	15	2	1	7.144	Short
202	NFB2629	kyIs104 [str-1p::GFP] X	wild type	20	1	AWB	15	2	2	7.987	Long
203	NFB2629	kyIs104 [str-1p::GFP] X	wild type	20	1	AWB	14	1	1	6.673	Short
204	NFB2629	kyIs104 [str-1p::GFP] X	wild type	20	1	AWB	14	1	2	6.871	Long
205	NFB2629	kyIs104 [str-1p::GFP] X	wild type	20	1	AWB	14	2	1	5.291	Short
206	NFB2629	kyIs104 [str-1p::GFP] X	wild type	20	1	AWB	14	2	2	7.032	Long
207	NFB2629	kyIs104 [str-1p::GFP] X	wild type	20	1	AWB	12	2	1	12.305	Long
208	NFB2629	kyIs104 [str-1p::GFP] X	wild type	20	1	AWB	12	2	2	7.54	Short
209	NFB2629	kyIs104 [str-1p::GFP] X	wild type	20	1	AWB	11	1	1	5.426	Short
210	NFB2629	kyIs104 [str-1p::GFP] X	wild type	20	1	AWB	11	1	2	7.16	Long
211	NFB2629	kyIs104 [str-1p::GFP] X	wild type	20	1	AWB	11	2	1	10.131	Long
212	NFB2629	kyIs104 [str-1p::GFP] X	wild type	20	1	AWB	11	2	2	9.466	Short
213	NFB2629	kyIs104 [str-1p::GFP] X	wild type	20	1	AWB	10	1	1	6.833	Short
214	NFB2629	kyIs104 [str-1p::GFP] X	wild type	20	1	AWB	10	1	2	10.572	Long
215	NFB2629	kyIs104 [str-1p::GFP] X	wild type	20	1	AWB	10	2	1	6.755	Short
216	NFB2629	kyIs104 [str-1p::GFP] X	wild type	20	1	AWB	10	2	2	8.114	Long
217	NFB2629	kyIs104 [str-1p::GFP] X	wild type	20	1	AWB	9	1	1	7.284	Short
218	NFB2629	kyIs104 [str-1p::GFP] X	wild type	20	1	AWB	9	1	2	9.387	Long
219	NFB2629	kyIs104 [str-1p::GFP] X	wild type	20	1	AWB	6	1	1	8.541	Short
220	NFB2629	kyIs104 [str-1p::GFP] X	wild type	20	1	AWB	6	1	2	10.656	Long
221	NFB2629	kyIs104 [str-1p::GFP] X	wild type	20	1	AWB	4	2	1	7.764	Short
222	NFB2629	kyIs104 [str-1p::GFP] X	wild type	20	1	AWB	4	2	2	8.847	Long
223	NFB2629	kyIs104 [str-1p::GFP] X	wild type	20	1	AWB	2	1	1	8.471	Short
224	NFB2629	kyIs104 [str-1p::GFP] X	wild type	20	1	AWB	2	1	2	8.553	Long
225	NFB2629	kyIs104 [str-1p::GFP] X	wild type	20	1	AWB	1	1	1	11.07	Long
226	NFB2629	kyIs104 [str-1p::GFP] X	wild type	20	1	AWB	1	1	2	5.869	Short
227	NFB2630	kyIs104 [str-1p::GFP] X	fkh-8(vlc43) II	20	1	AWB	13	1	1	7.076	Short
228	NFB2630	kyIs104 [str-1p::GFP] X	fkh-8(vlc43) II	20	1	AWB	13	1	2	7.246	Long
229	NFB2630	kyIs104 [str-1p::GFP] X	fkh-8(vlc43) II	20	1	AWB	12	1	1	6.663	Long
230	NFB2630	kyIs104 [str-1p::GFP] X	fkh-8(vlc43) II	20	1	AWB	12	1	2	6.649	Short
231	NFB2630	kyIs104 [str-1p::GFP] X	fkh-8(vlc43) II	20	1	AWB	12	2	1	6.262	Short
232	NFB2630	kyIs104 [str-1p::GFP] X	fkh-8(vlc43) II	20	1	AWB	12	2	2	9.574	Long
233	NFB2630	kyIs104 [str-1p::GFP] X	fkh-8(vlc43) II	20	1	AWB	11	1	1	5.46	Short
234	NFB2630	kyIs104 [str-1p::GFP] X	fkh-8(vlc43) II	20	1	AWB	11	1	2	8.954	Long
235	NFB2630	kyIs104 [str-1p::GFP] X	fkh-8(vlc43) II	20	1	AWB	10	2	1	5.339	Long
236	NFB2630	kyIs104 [str-1p::GFP] X	fkh-8(vlc43) II	20	1	AWB	10	2	2	4.57	Short
237	NFB2630	kyIs104 [str-1p::GFP] X	fkh-8(vlc43) II	20	1	AWB	9	1	1	6.218	Short
238	NFB2630	kyIs104 [str-1p::GFP] X	fkh-8(vlc43) II	20	1	AWB	9	1	2	8.982	Long
239	NFB2630	kyIs104 [str-1p::GFP] X	fkh-8(vlc43) II	20	1	AWB	9	2	1	5.941	Short
240	NFB2630	kyIs104 [str-1p::GFP] X	fkh-8(vlc43) II	20	1	AWB	9	2	2	8.456	Long
241	NFB2630	kyIs104 [str-1p::GFP] X	fkh-8(vlc43) II	20	1	AWB	8	1	1	7.092	Short
242	NFB2630	kyIs104 [str-1p::GFP] X	fkh-8(vlc43) II	20	1	AWB	8	1	2	9.295	Long
243	NFB2630	kyIs104 [str-1p::GFP] X	fkh-8(vlc43) II	20	1	AWB	7	2	1	5.382	Short
244	NFB2630	kyIs104 [str-1p::GFP] X	fkh-8(vlc43) II	20	1	AWB	7	2	2	8.9	Long
245	NFB2630	kyIs104 [str-1p::GFP] X	fkh-8(vlc43) II	20	1	AWB	7	1	1	8.795	Short
246	NFB2630	kyIs104 [str-1p::GFP] X	fkh-8(vlc43) II	20	1	AWB	7	1	2	9.845	Long
247	NFB2630	kyIs104 [str-1p::GFP] X	fkh-8(vlc43) II	20	1	AWB	6	2	1	7.583	Long
248	NFB2630	kyIs104 [str-1p::GFP] X	fkh-8(vlc43) II	20	1	AWB	6	2	2	5.585	Short
249	NFB2630	kyIs104 [str-1p::GFP] X	fkh-8(vlc43) II	20	1	AWB	5	1	1	7.604	Short
250	NFB2630	kyIs104 [str-1p::GFP] X	fkh-8(vlc43) II	20	1	AWB	5	1	2	9.855	Long
251	NFB2630	kyIs104 [str-1p::GFP] X	fkh-8(vlc43) II	20	1	AWB	4	1	1	5.625	Long
252	NFB2630	kyIs104 [str-1p::GFP] X	fkh-8(vlc43) II	20	1	AWB	4	1	2	4.926	Short
253	NFB2630	kyIs104 [str-1p::GFP] X	fkh-8(vlc43) II	20	1	AWB	4	2	1	7.545	Long
254	NFB2630	kyIs104 [str-1p::GFP] X	fkh-8(vlc43) II	20	1	AWB	4	2	2	5.674	Short
255	NFB2630	kyIs104 [str-1p::GFP] X	fkh-8(vlc43) II	20	1	AWB	3	2	1	9.927	Long
256	NFB2630	kyIs104 [str-1p::GFP] X	fkh-8(vlc43) II	20	1	AWB	3	2	2	8.71	Short
257	NFB2630	kyIs104 [str-1p::GFP] X	fkh-8(vlc43) II	20	1	AWB	3	1	1	10.695	Long
258	NFB2630	kyIs104 [str-1p::GFP] X	fkh-8(vlc43) II	20	1	AWB	3	1	2	10.665	Short
259	NFB2630	kyIs104 [str-1p::GFP] X	fkh-8(vlc43) II	20	1	AWB	2	1	1	6.035	Short
260	NFB2630	kyIs104 [str-1p::GFP] X	fkh-8(vlc43) II	20	1	AWB	2	1	2	9.473	Long
261	NFB2630	kyIs104 [str-1p::GFP] X	fkh-8(vlc43) II	20	1	AWB	1	1	1	7.08	Short
262	NFB2630	kyIs104 [str-1p::GFP] X	fkh-8(vlc43) II	20	1	AWB	1	1	2	7.212	Long
263	NFB2630	kyIs104 [str-1p::GFP] X	fkh-8(vlc43) II	20	2	AWB	24	1	1	7.813	Long
264	NFB2630	kyIs104 [str-1p::GFP] X	fkh-8(vlc43) II	20	2	AWB	24	1	2	5.989	Short
265	NFB2630	kyIs104 [str-1p::GFP] X	fkh-8(vlc43) II	20	2	AWB	22	1	1	6.323	Short
266	NFB2630	kyIs104 [str-1p::GFP] X	fkh-8(vlc43) II	20	2	AWB	22	1	2	7.903	Long
267	NFB2630	kyIs104 [str-1p::GFP] X	fkh-8(vlc43) II	20	2	AWB	20	1	1	11.161	Long
268	NFB2630	kyIs104 [str-1p::GFP] X	fkh-8(vlc43) II	20	2	AWB	20	1	2	9.648	Short
269	NFB2630	kyIs104 [str-1p::GFP] X	fkh-8(vlc43) II	20	2	AWB	17	2	1	7.184	Short
270	NFB2630	kyIs104 [str-1p::GFP] X	fkh-8(vlc43) II	20	2	AWB	17	2	2	9.504	Long
271	NFB2630	kyIs104 [str-1p::GFP] X	fkh-8(vlc43) II	20	2	AWB	16	1	1	6.231	Short
272	NFB2630	kyIs104 [str-1p::GFP] X	fkh-8(vlc43) II	20	2	AWB	16	1	2	11.258	Long
273	NFB2630	kyIs104 [str-1p::GFP] X	fkh-8(vlc43) II	20	2	AWB	15	1	1	11.808	Long
274	NFB2630	kyIs104 [str-1p::GFP] X	fkh-8(vlc43) II	20	2	AWB	15	1	2	5.921	Short
275	NFB2630	kyIs104 [str-1p::GFP] X	fkh-8(vlc43) II	20	2	AWB	14	1	1	9.909	Long
276	NFB2630	kyIs104 [str-1p::GFP] X	fkh-8(vlc43) II	20	2	AWB	14	1	2	9.152	Short
277	NFB2630	kyIs104 [str-1p::GFP] X	fkh-8(vlc43) II	20	2	AWB	19	1	1	11.323	Long
278	NFB2630	kyIs104 [str-1p::GFP] X	fkh-8(vlc43) II	20	2	AWB	19	1	2	7.284	Short
279	NFB2630	kyIs104 [str-1p::GFP] X	fkh-8(vlc43) II	20	2	AWB	18	1	1	8.77	Short
280	NFB2630	kyIs104 [str-1p::GFP] X	fkh-8(vlc43) II	20	2	AWB	18	1	2	12.761	Long
281	NFB2452	pkIs583[gpa-6::GFP + dpy-20(+)]	wild type	20	1	PHB	3	1	1	14.393
282	NFB2452	pkIs583[gpa-6::GFP + dpy-20(+)]	wild type	20	1	PHB	3	2	1	13.261
283	NFB2452	pkIs583[gpa-6::GFP + dpy-20(+)]	wild type	20	1	PHB	4	1	1	13.242
284	NFB2452	pkIs583[gpa-6::GFP + dpy-20(+)]	wild type	20	1	PHB	4	2	1	11.667
285	NFB2452	pkIs583[gpa-6::GFP + dpy-20(+)]	wild type	20	1	PHB	5	1	1	13.812
286	NFB2452	pkIs583[gpa-6::GFP + dpy-20(+)]	wild type	20	1	PHB	5	2	1	11.904
287	NFB2452	pkIs583[gpa-6::GFP + dpy-20(+)]	wild type	20	1	PHB	6	1	1	10.391
288	NFB2452	pkIs583[gpa-6::GFP + dpy-20(+)]	wild type	20	1	PHB	6	2	1	9.712
289	NFB2452	pkIs583[gpa-6::GFP + dpy-20(+)]	wild type	20	1	PHB	7	1	1	14.228
290	NFB2452	pkIs583[gpa-6::GFP + dpy-20(+)]	wild type	20	1	PHB	7	2	1	9.771
291	NFB2452	pkIs583[gpa-6::GFP + dpy-20(+)]	wild type	20	1	PHB	8	1	1	10.667
292	NFB2452	pkIs583[gpa-6::GFP + dpy-20(+)]	wild type	20	1	PHB	8	2	1	11.022
293	NFB2452	pkIs583[gpa-6::GFP + dpy-20(+)]	wild type	20	1	PHB	9	1	1	10.18
294	NFB2452	pkIs583[gpa-6::GFP + dpy-20(+)]	wild type	20	1	PHB	9	2	1	13.069
295	NFB2452	pkIs583[gpa-6::GFP + dpy-20(+)]	wild type	20	1	PHB	10	1	1	9.955
296	NFB2452	pkIs583[gpa-6::GFP + dpy-20(+)]	wild type	20	1	PHB	10	2	1	9.139
297	NFB2452	pkIs583[gpa-6::GFP + dpy-20(+)]	wild type	20	1	PHB	11	1	1	12.045
298	NFB2452	pkIs583[gpa-6::GFP + dpy-20(+)]	wild type	20	1	PHB	11	2	1	11.886
299	NFB2452	pkIs583[gpa-6::GFP + dpy-20(+)]	wild type	20	1	PHB	12	1	1	7.454
300	NFB2452	pkIs583[gpa-6::GFP + dpy-20(+)]	wild type	20	1	PHB	12	2	1	6.637
301	NFB2452	pkIs583[gpa-6::GFP + dpy-20(+)]	wild type	20	1	PHB	13	1	1	7.654
302	NFB2452	pkIs583[gpa-6::GFP + dpy-20(+)]	wild type	20	1	PHB	13	2	1	8.032
303	NFB2452	pkIs583[gpa-6::GFP + dpy-20(+)]	wild type	20	1	PHB	14	1	1	13.99
304	NFB2452	pkIs583[gpa-6::GFP + dpy-20(+)]	wild type	20	1	PHB	14	2	1	14.88
305	NFB2452	pkIs583[gpa-6::GFP + dpy-20(+)]	wild type	20	1	PHB	15	1	1	8.329
306	NFB2452	pkIs583[gpa-6::GFP + dpy-20(+)]	wild type	20	1	PHB	15	2	1	7.82
307	NFB2452	pkIs583[gpa-6::GFP + dpy-20(+)]	wild type	20	1	PHB	16	1	1	14.42
308	NFB2452	pkIs583[gpa-6::GFP + dpy-20(+)]	wild type	20	1	PHB	16	2	1	13.674
309	NFB2453	pkIs583[gpa-6::GFP + dpy-20(+)]	fkh-8(vlc43) II	20	1	PHB	1	1	1	6.722
310	NFB2453	pkIs583[gpa-6::GFP + dpy-20(+)]	fkh-8(vlc43) II	20	1	PHB	1	2	1	7.059
311	NFB2453	pkIs583[gpa-6::GFP + dpy-20(+)]	fkh-8(vlc43) II	20	1	PHB	2	1	1	6.1
312	NFB2453	pkIs583[gpa-6::GFP + dpy-20(+)]	fkh-8(vlc43) II	20	1	PHB	2	2	1	5.794
313	NFB2453	pkIs583[gpa-6::GFP + dpy-20(+)]	fkh-8(vlc43) II	20	1	PHB	3	1	1	9.135
314	NFB2453	pkIs583[gpa-6::GFP + dpy-20(+)]	fkh-8(vlc43) II	20	1	PHB	3	2	1	9.649
315	NFB2453	pkIs583[gpa-6::GFP + dpy-20(+)]	fkh-8(vlc43) II	20	1	PHB	4	1	1	9.4
316	NFB2453	pkIs583[gpa-6::GFP + dpy-20(+)]	fkh-8(vlc43) II	20	1	PHB	4	2	1	9.392
317	NFB2453	pkIs583[gpa-6::GFP + dpy-20(+)]	fkh-8(vlc43) II	20	1	PHB	5	1	1	9.474
318	NFB2453	pkIs583[gpa-6::GFP + dpy-20(+)]	fkh-8(vlc43) II	20	1	PHB	5	2	1	8.871
319	NFB2453	pkIs583[gpa-6::GFP + dpy-20(+)]	fkh-8(vlc43) II	20	1	PHB	6	1	1	9.253
320	NFB2453	pkIs583[gpa-6::GFP + dpy-20(+)]	fkh-8(vlc43) II	20	1	PHB	6	2	1	7.815
321	NFB2453	pkIs583[gpa-6::GFP + dpy-20(+)]	fkh-8(vlc43) II	20	1	PHB	7	1	1	7.755
322	NFB2453	pkIs583[gpa-6::GFP + dpy-20(+)]	fkh-8(vlc43) II	20	1	PHB	7	2	1	7.18
323	NFB2453	pkIs583[gpa-6::GFP + dpy-20(+)]	fkh-8(vlc43) II	20	1	PHB	8	1	1	8.71
324	NFB2453	pkIs583[gpa-6::GFP + dpy-20(+)]	fkh-8(vlc43) II	20	1	PHB	8	2	1	8.705
325	NFB2453	pkIs583[gpa-6::GFP + dpy-20(+)]	fkh-8(vlc43) II	20	1	PHB	9	1	1	9.635
326	NFB2453	pkIs583[gpa-6::GFP + dpy-20(+)]	fkh-8(vlc43) II	20	1	PHB	9	2	1	9.321
327	NFB2453	pkIs583[gpa-6::GFP + dpy-20(+)]	fkh-8(vlc43) II	20	1	PHB	10	1	1	9.745
328	NFB2453	pkIs583[gpa-6::GFP + dpy-20(+)]	fkh-8(vlc43) II	20	1	PHB	10	2	1	8.679
329	NFB2453	pkIs583[gpa-6::GFP + dpy-20(+)]	fkh-8(vlc43) II	20	1	PHB	11	1	1	9.314
330	NFB2453	pkIs583[gpa-6::GFP + dpy-20(+)]	fkh-8(vlc43) II	20	1	PHB	11	2	1	9.436
331	NFB2453	pkIs583[gpa-6::GFP + dpy-20(+)]	fkh-8(vlc43) II	20	1	PHB	12	1	1	8.083
332	NFB2453	pkIs583[gpa-6::GFP + dpy-20(+)]	fkh-8(vlc43) II	20	1	PHB	12	2	1	8.798
333	NFB2453	pkIs583[gpa-6::GFP + dpy-20(+)]	fkh-8(vlc43) II	20	1	PHB	13	1	1	9.803
334	NFB2453	pkIs583[gpa-6::GFP + dpy-20(+)]	fkh-8(vlc43) II	20	1	PHB	13	2	1	9.805
335	NFB2453	pkIs583[gpa-6::GFP + dpy-20(+)]	fkh-8(vlc43) II	20	1	PHB	14	1	1	6.428
336	NFB2453	pkIs583[gpa-6::GFP + dpy-20(+)]	fkh-8(vlc43) II	20	1	PHB	14	2	1	7.591
337	NFB2453	pkIs583[gpa-6::GFP + dpy-20(+)]	fkh-8(vlc43) II	20	1	PHB	15	1	1	10.209
338	NFB2453	pkIs583[gpa-6::GFP + dpy-20(+)]	fkh-8(vlc43) II	20	1	PHB	15	2	1	9.957

## Sheet: F5 FS1 pval
Neuron	wild type MEAN	vlc43 MEAN	wild type SD	vlc43 SD	F (p-val)	t (p-val)
CEP	3.79546	3.23046	0.96699	1.23171	0.0817716	0.00936779
ADF	6.6208	5.26593	1.77268	1.34074	0.138463	0.00147438
AWB(short)	6.80341	6.89726	1.64999	1.5203	0.679451	0.828779
AWB(long)	9.35644	9.05959	1.68525	1.83524	0.666953	0.538574
PHB	11.1869	8.59393	2.48702	1.24291	0.000406784	1.3784e-05
