# Supplementary material for: Forkhead transcription factor FKH-8 cooperates with RFX in the direct regulation of sensory cilia in Caenorhabditis elegans
Source: eLife. 2023 Jul 14;12:e89702. doi: 10.7554/eLife.89702 (PMC10393296; doi:10.7554/eLife.89702)
Supplement: Figure 6—source data 1. [file elife-89702-fig6-data1.xlsx]

## Sheet: Fig 6 & F6SF1
Genotype	Stimulus	Replicate	Temp. (ºC)	N (worms)	Touches	Response YES	Response NO	Response Índex
wild type	Anterior Gentle	1	20	20	5	92	8	0.92
wild type	Anterior Gentle	2	20	20	5	91	9	0.91
wild type	Anterior Gentle	3	20	20	5	93	7	0.93
fkh-8(tm292)	Anterior Gentle	1	20	20	5	93	7	0.93
fkh-8(tm292)	Anterior Gentle	2	20	20	5	92	8	0.92
fkh-8(tm292)	Anterior Gentle	3	20	20	5	93	7	0.93
fkh-8(vlc43)	Anterior Gentle	1	20	20	5	92	8	0.92
fkh-8(vlc43)	Anterior Gentle	2	20	20	5	92	8	0.92
fkh-8(vlc43)	Anterior Gentle	3	20	20	5	93	7	0.93
wild type	Posterior Gentle	1	20	20	5	89	11	0.89
wild type	Posterior Gentle	2	20	20	5	94	6	0.94
wild type	Posterior Gentle	3	20	20	5	89	11	0.89
fkh-8(tm292)	Posterior Gentle	1	20	20	5	93	7	0.93
fkh-8(tm292)	Posterior Gentle	2	20	20	5	90	10	0.9
fkh-8(tm292)	Posterior Gentle	3	20	20	5	90	10	0.9
fkh-8(vlc43)	Posterior Gentle	1	20	20	5	91	9	0.91
fkh-8(vlc43)	Posterior Gentle	2	20	20	5	93	7	0.93
fkh-8(vlc43)	Posterior Gentle	3	20	20	5	94	6	0.94
wild type	Harsh Touch	1	20	30	5	150	0	1
wild type	Harsh Touch	2	20	30	5	149	1	0.993333
wild type	Harsh Touch	3	20	30	5	150	0	1
fkh-8(tm292)	Harsh Touch	1	20	30	5	148	2	0.986667
fkh-8(tm292)	Harsh Touch	2	20	30	5	150	0	1
fkh-8(tm292)	Harsh Touch	3	20	30	5	150	0	1
fkh-8(vlc43)	Harsh Touch	1	20	30	5	141	9	0.94
fkh-8(vlc43)	Harsh Touch	2	20	30	5	138	12	0.92
fkh-8(vlc43)	Harsh Touch	3	20	30	5	144	6	0.96
wild type	Nose Touch	1	20	20	5	100	0	1
wild type	Nose Touch	2	20	20	5	98	2	0.98
wild type	Nose Touch	3	20	20	5	98	2	0.98
fkh-8(tm292)	Nose Touch	1	20	20	5	83	17	0.83
fkh-8(tm292)	Nose Touch	2	20	20	5	81	19	0.81
fkh-8(tm292)	Nose Touch	3	20	20	5	79	21	0.79
fkh-8(vlc43)	Nose Touch	1	20	20	5	58	42	0.58
fkh-8(vlc43)	Nose Touch	2	20	20	5	44	56	0.44
fkh-8(vlc43)	Nose Touch	3	20	20	5	46	54	0.46

## Sheet: Fig 6 &  F6SF1p-val
F test
Background 1	Background 2	Ant.	Post.	Harsh	Nose
wild type	fkh-8(tm292)	0.5	0.529412	0.4	0.5
wild type	fkh-8(vlc43)	0.5	0.4375	0.0714286	0.0454545
fkh-8(tm292)	fkh-8(vlc43)	1	0.875	0.258065	0.130435
t test
Background 1	Background 2	Ant.	Post.	Harsh	Nose
wild type	fkh-8(tm292)	0.373901	0.872158	0.677869	0.000187488
wild type	fkh-8(vlc43)	0.64333	0.348641	0.0079662	0.0067429
fkh-8(tm292)	fkh-8(vlc43)	0.518519	0.27944	0.0109047	0.00218804
	Bonferroni	0.0166667	0.0166667	0.0166667	0.0166667

## Sheet: Fig 6B
Background	Agar (Bends/20s)	Food (Bends/20s)	Agar (Hz)	Food (Hz)
wild type	15	8	0.375	0.2		Background 1	Background 2	AGAR vs FOOD	AGAR vs AGAR	FOOD vs FOOD
wild type	14	7	0.35	0.175		wild type	wild type	3.26186e-10
wild type	16	8	0.4	0.2		fkh-8(vlc43)	fkh-8(vlc43)	2.03201e-12
wild type	18	9	0.45	0.225		wild type	fkh-8(vlc43)		0.686759	0.0100965
wild type	14	7	0.35	0.175			Bonferroni	0.0125	0.0125	0.0125
wild type	13	9	0.325	0.225
wild type	16	9	0.4	0.225
wild type	13	10	0.325	0.25
wild type	16	9	0.4	0.225
wild type	15	8	0.375	0.2
wild type	17	9	0.425	0.225
wild type	22	8	0.55	0.2
wild type	18	11	0.45	0.275
wild type	16	10	0.4	0.25
wild type	16	7	0.4	0.175
fkh-8(vlc43)	15	6	0.375	0.15
fkh-8(vlc43)	16	9	0.4	0.225
fkh-8(vlc43)	13	10	0.325	0.25
fkh-8(vlc43)	19	6	0.475	0.15
fkh-8(vlc43)	15	7	0.375	0.175
fkh-8(vlc43)	16	7	0.4	0.175
fkh-8(vlc43)	14	6	0.35	0.15
fkh-8(vlc43)	15	8	0.375	0.2
fkh-8(vlc43)	17	8	0.425	0.2
fkh-8(vlc43)	20	9	0.5	0.225
fkh-8(vlc43)	15	9	0.375	0.225
fkh-8(vlc43)	17	4	0.425	0.1
fkh-8(vlc43)	11	7	0.275	0.175
fkh-8(vlc43)	16	6	0.4	0.15
fkh-8(vlc43)	15	5	0.375	0.125

## Sheet: Fig 6C
Genotype	Treatment	Replicate	# Dauer	# No Dauer	Total worms	% Dauer
fkh-8(vlc43)	Control	1	26	565	591	4.39932
fkh-8(vlc43)	Control	2	43	297	340	12.6471
fkh-8(vlc43)	Control	3	51	371	422	12.0853
fkh-8(vlc43)	Control	4	49	749	798	6.14035
wild type	Control	1	5	604	609	0.821018
wild type	Control	2	5	290	295	1.69492
wild type	Control	3	20	431	451	4.43459
wild type	Control	4	7	386	393	1.78117
fkh-8(vlc43)	Pheromones	1	77	459	536	14.3657
fkh-8(vlc43)	Pheromones	2	94	279	373	25.2011
fkh-8(vlc43)	Pheromones	3	132	254	386	34.1969
fkh-8(vlc43)	Pheromones	4	205	554	759	27.0092
wild type	Pheromones	1	23	497	520	4.42308
wild type	Pheromones	2	39	259	298	13.0872
wild type	Pheromones	3	86	355	441	19.5011
wild type	Pheromones	4	100	632	732	13.6612

## Sheet: Fig 6C p-val
F test
Background 1	Background 2	C vs C	C vs P
wild type	wild type	NA	0.0483547
wild type	fkh-8(vlc43)	0.141601	NA
fkh-8(vlc43)	fkh-8(vlc43)	NA	0.295291
t test
Background 1	Background 2	C vs C	C vs P
wild type	wild type	NA	0.0393143
wild type	fkh-8(vlc43)	0.0245299	NA
fkh-8(vlc43)	fkh-8(vlc43)	NA	0.0119005

## Sheet: Fig 6D
Genotype	Reagent	Replicate	A (worms)	B (worms)	E (worms)	F (worms)	Center (worms)	Total (worms)	A+B	E+F	I-J	Avoidance Index
wild type	2-nonanone 1:10	1	2	3	16	31	7	59	5	47	-42	-0.711864
wild type	2-nonanone 1:10	2	3	1	18	82	24	128	4	100	-96	-0.75
wild type	2-nonanone 1:10	3	6	7	24	65	12	114	13	89	-76	-0.666667
wild type	2-nonanone 1:10	4	3	3	23	119	17	165	6	142	-136	-0.824242
fkh-8(tm292)	2-nonanone 1:10	1	5	3	15	47	6	76	8	62	-54	-0.710526
fkh-8(tm292)	2-nonanone 1:10	2	0	9	20	56	38	123	9	76	-67	-0.544715
fkh-8(tm292)	2-nonanone 1:10	3	0	8	26	55	40	129	8	81	-73	-0.565891
fkh-8(tm292)	2-nonanone 1:10	4	1	2	34	62	110	209	3	96	-93	-0.444976
fkh-8(vlc43)	2-nonanone 1:10	1	0	3	14	25	40	82	3	39	-36	-0.439024
fkh-8(vlc43)	2-nonanone 1:10	2	2	3	5	36	46	92	5	41	-36	-0.391304
fkh-8(vlc43)	2-nonanone 1:10	3	4	7	16	52	51	130	11	68	-57	-0.438462
fkh-8(vlc43)	2-nonanone 1:10	4	1	0	29	54	55	139	1	83	-82	-0.589928

## Sheet: Fig 6E
Genotype	Reagent	Replicate	A (worms)	B (worms)	CENTRE (worms)	TOTAL (worms)	A-B	Chemo Index
wild type	Heptanona 1:10	1	106	13	5	124	93	0.781513
wild type	Heptanona 1:10	2	97	21	11	129	76	0.644068
wild type	Heptanona 1:10	3	112	14	7	133	98	0.777778
fkh-8(tm292)	Heptanona 1:10	1	52	13	3	68	39	0.6
fkh-8(tm292)	Heptanona 1:10	2	70	11	13	94	59	0.728395
fkh-8(tm292)	Heptanona 1:10	3	75	17	10	102	58	0.630435
fkh-8(vlc43)	Heptanona 1:10	1	47	24	16	87	23	0.323944
fkh-8(vlc43)	Heptanona 1:10	2	46	29	8	83	17	0.226667
fkh-8(vlc43)	Heptanona 1:10	3	43	30	12	85	13	0.178082

## Sheet: Fig 6F
Genotype	Assay	Replicate	T1 (worms)	T2 (worms)	C1 (worms)	C2 (worms)	CENTRE (worms)	TOTAL (worms)	T1+T2 (worms)	C1+C2 (worms)	Ts-Cs (worms)	Chem Index
wild type	Diacetyl 0,5%	1	74	82	8	4	0	168	156	12	144	0.857143
wild type	Diacetyl 0,5%	2	37	25	3	4	0	69	62	7	55	0.797101
wild type	Diacetyl 0,5%	3	52	45	0	3	3	103	97	3	94	0.94
fkh-8(tm292)	Diacetyl 0,5%	1	20	31	1	3	2	57	51	4	47	0.854545
fkh-8(tm292)	Diacetyl 0,5%	2	29	33	5	9	9	85	62	14	48	0.631579
fkh-8(tm292)	Diacetyl 0,5%	3	44	48	12	6	0	110	92	18	74	0.672727
fkh-8(vlc43)	Diacetyl 0,5%	1	52	46	5	8	4	115	98	13	85	0.765766
fkh-8(vlc43)	Diacetyl 0,5%	2	30	26	15	21	15	107	56	36	20	0.217391
fkh-8(vlc43)	Diacetyl 0,5%	3	35	18	5	13	3	74	53	18	35	0.492958

## Sheet: Fig 6G
Genotype	Assay	Replicate	NaCl (worms)	H2O (worms)	CENTRE (worms)	TOTAL (worms)	NaCl-H2O (worms)	Chemo Index
wild type	NaCl 2,5 M	1	51	3	8	62	48	0.888889
wild type	NaCl 2,5 M	2	71	5	2	78	66	0.868421
wild type	NaCl 2,5 M	3	67	3	2	72	64	0.914286
fkh-8(tm292)	NaCl 2,5 M	1	87	5	13	105	82	0.891304
fkh-8(tm292)	NaCl 2,5 M	2	92	14	10	116	78	0.735849
fkh-8(tm292)	NaCl 2,5 M	3	89	8	9	106	81	0.835052
fkh-8(vlc43)	NaCl 2,5 M	1	92	5	14	111	87	0.896907
fkh-8(vlc43)	NaCl 2,5 M	2	39	10	3	52	29	0.591837
fkh-8(vlc43)	NaCl 2,5 M	3	62	5	11	78	57	0.850746

## Sheet: Fig 6D-G p-val
F test
Background 1	Background 2	2-nonanone	2-heptanone	Diacetyl	NaCl
wild type	fkh-8(tm292)	0.437116	0.846756	0.535567	0.157043
wild type	fkh-8(vlc43)	0.706849	0.947275	0.315439	0.038301
fkh-8(tm292)	fkh-8(vlc43)	0.706849	0.898663	0.315439	0.372828
t test
Background 1	Background 2	2-nonanone	2-heptanone	Diacetyl	NaCl
wild type	fkh-8(tm292)	0.036674	0.242783	0.144058	0.214395
wild type	fkh-8(vlc43)	0.00242879	0.00139606	0.0850008	0.363664
fkh-8(tm292)	fkh-8(vlc43)	0.19461	0.00208306	0.257493	0.717345
	Bonferroni	0.0166667	0.0166667	0.0166667	0.0166667

[truncated: 2 more sheets: Fig 6H-I, Fig 6H-I p-val]
