# Supplementary material for: Forkhead transcription factor FKH-8 cooperates with RFX in the direct regulation of sensory cilia in Caenorhabditis elegans
Source: eLife. 2023 Jul 14;12:e89702. doi: 10.7554/eLife.89702 (PMC10393296; doi:10.7554/eLife.89702)
Supplement: Figure 7—source data 1. [file elife-89702-fig7-data1.xlsx]

## Sheet: F7 C
Rescue	Array	Background	ift-20 Reporter (R)	T (ºC)	Worm	CEPV G	CEPV RG	CEPD G	CEPD RG	ADE G	ADE RG	PDE G	PDE RG
None	None	wild type	otIs395	25	1	2	2	2	2	2	2	2	2
None	None	wild type	otIs395	25	2	2	2	2	2	2	2	2	2
None	None	wild type	otIs395	25	3	2	2	2	1	2	1	2	2
None	None	wild type	otIs395	25	4	2	2	2	2	2	2	2	2
None	None	wild type	otIs395	25	5	2	2	2	2	2	2	2	2
None	None	wild type	otIs395	25	6	2	2	2	2	2	2	2	2
None	None	wild type	otIs395	25	7	2	2	2	2	2	2	2	2
None	None	wild type	otIs395	25	8	2	2	2	2	2	2	2	2
None	None	wild type	otIs395	25	9	2	2	2	2	2	1	2	2
None	None	wild type	otIs395	25	10	2	2	2	2	2	2	2	2
None	None	wild type	otIs395	25	11	2	2	2	2	2	2	2	0
None	None	wild type	otIs395	25	12	2	2	2	2	2	2	2	2
None	None	wild type	otIs395	25	13	2	2	2	2	2	1	2	2
None	None	wild type	otIs395	25	14	2	2	2	2	2	1	2	0
None	None	wild type	otIs395	25	15	2	2	2	2	2	1	1	1
None	None	wild type	otIs395	25	16	2	2	2	2	2	1	2	2
None	None	wild type	otIs395	25	17	2	2	2	2	2	2	2	2
None	None	wild type	otIs395	25	18	2	2	2	2	2	2	2	2
None	None	wild type	otIs395	25	19	2	2	2	2	2	2	2	2
None	None	wild type	otIs395	25	20	2	2	2	2	2	1	2	2
None	None	wild type	otIs395	25	21	2	2	2	2	2	2	2	2
None	None	wild type	otIs395	25	22	2	2	2	2	2	2	2	2
None	None	wild type	otIs395	25	23	2	2	2	2	2	2	2	2
None	None	wild type	otIs395	25	24	2	2	2	2	2	2	2	2
None	None	wild type	otIs395	25	25	2	2	1	1	2	2	2	2
None	None	wild type	otIs395	25	26	2	2	2	2	2	2	2	1
None	None	wild type	otIs395	25	27	2	2	1	1	2	1	2	2
None	None	wild type	otIs395	25	28	2	2	2	2	2	1	2	2
None	None	wild type	otIs395	25	29	2	2	2	1	2	2	2	2
None	None	wild type	otIs395	25	30	2	2	2	2	2	1	2	2
None	None	vlc43	otIs395	25	1	2	2	2	2	2	0	2	0
None	None	vlc43	otIs395	25	2	2	2	2	0	2	0	2	0
None	None	vlc43	otIs395	25	3	2	0	2	0	2	0	2	0
None	None	vlc43	otIs395	25	4	2	0	2	0	2	0	2	0
None	None	vlc43	otIs395	25	5	2	0	2	0	2	0	2	0
None	None	vlc43	otIs395	25	6	2	0	2	0	2	0	1	0
None	None	vlc43	otIs395	25	7	2	0	2	0	2	0	2	0
None	None	vlc43	otIs395	25	8	2	0	2	0	2	0	2	0
None	None	vlc43	otIs395	25	9	2	0	2	0	2	0	2	0
None	None	vlc43	otIs395	25	10	2	0	2	0	2	0	2	0
None	None	vlc43	otIs395	25	11	2	0	2	0	2	0	2	0
None	None	vlc43	otIs395	25	12	2	2	2	0	2	0	2	0
None	None	vlc43	otIs395	25	13	2	0	2	0	2	0	2	0
None	None	vlc43	otIs395	25	14	2	0	2	0	2	0	2	0
None	None	vlc43	otIs395	25	15	2	0	2	0	2	0	2	0
None	None	vlc43	otIs395	25	16	2	0	2	0	2	0	2	0
None	None	vlc43	otIs395	25	17	2	0	2	0	2	0	1	0
None	None	vlc43	otIs395	25	18	2	0	2	0	2	0	2	0
None	None	vlc43	otIs395	25	19	2	0	2	0	2	0	2	0
None	None	vlc43	otIs395	25	20	2	0	2	0	2	0	2	0
None	None	vlc43	otIs395	25	21	2	0	2	0	2	0	2	0
None	None	vlc43	otIs395	25	22	2	0	2	0	2	0	2	0
None	None	vlc43	otIs395	25	23	2	0	2	0	2	0	2	0
None	None	vlc43	otIs395	25	24	2	0	2	0	2	0	2	0
None	None	vlc43	otIs395	25	25	2	0	2	0	2	0	2	0
None	None	vlc43	otIs395	25	26	2	0	2	0	2	0	2	0
None	None	vlc43	otIs395	25	27	2	0	2	0	2	0	2	0
None	None	vlc43	otIs395	25	28	2	0	2	0	2	0	2	0
None	None	vlc43	otIs395	25	29	2	0	2	0	2	0	2	0
None	None	vlc43	otIs395	25	30	2	0	2	0	2	0	2	0
FKH-8	vlcEx1241	vlc43	otIs395	25	1	2	2	2	2	2	2	2	2
FKH-8	vlcEx1241	vlc43	otIs395	25	2	2	2	2	2	2	2	2	2
FKH-8	vlcEx1241	vlc43	otIs395	25	3	2	2	2	2	2	2	2	2
FKH-8	vlcEx1241	vlc43	otIs395	25	4	2	2	2	2	2	2	2	2
FKH-8	vlcEx1241	vlc43	otIs395	25	5	2	2	2	2	2	2	2	2
FKH-8	vlcEx1241	vlc43	otIs395	25	6	2	2	2	2	2	2	2	2
FKH-8	vlcEx1241	vlc43	otIs395	25	7	2	2	2	2	2	2	2	2
FKH-8	vlcEx1241	vlc43	otIs395	25	8	2	2	2	2	2	2	2	2
FKH-8	vlcEx1241	vlc43	otIs395	25	9	2	2	2	2	2	2	2	2
FKH-8	vlcEx1241	vlc43	otIs395	25	10	2	2	2	2	2	2	2	2
FKH-8	vlcEx1241	vlc43	otIs395	25	11	2	2	2	2	2	2	2	2
FKH-8	vlcEx1241	vlc43	otIs395	25	12	2	2	2	2	2	2	2	2
FKH-8	vlcEx1241	vlc43	otIs395	25	13	2	2	1	1	2	2	2	2
FKH-8	vlcEx1241	vlc43	otIs395	25	14	2	2	2	2	1	1	2	2
FKH-8	vlcEx1241	vlc43	otIs395	25	15	2	2	2	2	2	2	1	1
FKH-8	vlcEx1241	vlc43	otIs395	25	16	2	2	2	2	2	2	2	2
FKH-8	vlcEx1241	vlc43	otIs395	25	17	1	1	2	2	2	2	2	2
FKH-8	vlcEx1241	vlc43	otIs395	25	18	2	2	2	2	2	2	2	2
FKH-8	vlcEx1241	vlc43	otIs395	25	19	2	2	2	2	1	1	2	2
FKH-8	vlcEx1241	vlc43	otIs395	25	20	1	1	2	2	2	2	2	2
FKH-8	vlcEx1241	vlc43	otIs395	25	21	2	2	2	2	1	1	1	1
FKH-8	vlcEx1241	vlc43	otIs395	25	22	2	2	2	2	2	2	2	2
FKH-8	vlcEx1241	vlc43	otIs395	25	23	2	2	2	2	2	2	2	2
FKH-8	vlcEx1241	vlc43	otIs395	25	24	2	2	2	2	2	2	2	2
FKH-8	vlcEx1241	vlc43	otIs395	25	25	2	2	2	2	2	2	2	2
FKH-8	vlcEx1241	vlc43	otIs395	25	26	2	2	2	2	1	1	2	2
FKH-8	vlcEx1241	vlc43	otIs395	25	27	2	2	2	2	2	2	2	2
FKH-8	vlcEx1241	vlc43	otIs395	25	28	2	2	2	2	2	2	2	2
FKH-8	vlcEx1241	vlc43	otIs395	25	29	1	1	2	2	2	2	2	2
FKH-8	vlcEx1241	vlc43	otIs395	25	30	2	2	2	2	2	2	2	2
FKH-8	vlcEx1242	vlc43	otIs395	25	1	1	1	2	2	2	2	2	2
FKH-8	vlcEx1242	vlc43	otIs395	25	2	2	2	2	2	2	2	2	2
FKH-8	vlcEx1242	vlc43	otIs395	25	3	2	2	2	2	2	2	2	2
FKH-8	vlcEx1242	vlc43	otIs395	25	4	1	1	2	2	2	2	2	2
FKH-8	vlcEx1242	vlc43	otIs395	25	5	2	2	2	2	2	2	2	2
FKH-8	vlcEx1242	vlc43	otIs395	25	6	2	2	2	2	2	2	2	2
FKH-8	vlcEx1242	vlc43	otIs395	25	7	2	2	2	2	2	2	2	2
FKH-8	vlcEx1242	vlc43	otIs395	25	8	2	2	2	2	2	2	2	2
FKH-8	vlcEx1242	vlc43	otIs395	25	9	2	2	2	2	2	2	2	2
FKH-8	vlcEx1242	vlc43	otIs395	25	10	2	2	2	2	2	2	0	0
FKH-8	vlcEx1242	vlc43	otIs395	25	11	2	2	2	2	2	2	2	2
FKH-8	vlcEx1242	vlc43	otIs395	25	12	2	2	2	2	2	2	2	2
FKH-8	vlcEx1242	vlc43	otIs395	25	13	2	2	2	2	2	2	2	2
FKH-8	vlcEx1242	vlc43	otIs395	25	14	2	2	2	2	2	2	1	1
FKH-8	vlcEx1242	vlc43	otIs395	25	15	2	2	2	2	2	2	1	1
FKH-8	vlcEx1242	vlc43	otIs395	25	16	2	2	2	2	2	2	1	1
FKH-8	vlcEx1242	vlc43	otIs395	25	17	2	2	2	2	2	2	2	2
FKH-8	vlcEx1242	vlc43	otIs395	25	18	2	2	2	2	1	1	1	1
FKH-8	vlcEx1242	vlc43	otIs395	25	19	2	2	2	2	2	2	2	2
FKH-8	vlcEx1242	vlc43	otIs395	25	20	2	2	2	2	2	2	2	2
FKH-8	vlcEx1242	vlc43	otIs395	25	21	2	2	2	2	2	2	2	2
FKH-8	vlcEx1242	vlc43	otIs395	25	22	2	2	1	1	2	2	2	2
FKH-8	vlcEx1242	vlc43	otIs395	25	23	2	2	2	2	2	2	2	2
FKH-8	vlcEx1242	vlc43	otIs395	25	24	2	2	2	2	2	2	1	1
FKH-8	vlcEx1242	vlc43	otIs395	25	25	1	1	2	2	2	2	2	2
FKH-8	vlcEx1242	vlc43	otIs395	25	26	2	2	2	2	2	2	2	2
FKH-8	vlcEx1242	vlc43	otIs395	25	27	2	2	2	2	2	2	1	1
FKH-8	vlcEx1242	vlc43	otIs395	25	28	1	1	2	2	1	1	1	1
FKH-8	vlcEx1242	vlc43	otIs395	25	29	2	2	2	2	2	2	2	2
FKH-8	vlcEx1242	vlc43	otIs395	25	30	2	2	2	2	2	2	2	2
FKH-8	vlcEx1243	vlc43	otIs395	25	1	2	2	2	2	2	2	2	2
FKH-8	vlcEx1243	vlc43	otIs395	25	2	2	2	2	2	2	2	2	2
FKH-8	vlcEx1243	vlc43	otIs395	25	3	2	2	2	2	2	2	2	2
FKH-8	vlcEx1243	vlc43	otIs395	25	4	1	1	2	2	2	2	1	1
FKH-8	vlcEx1243	vlc43	otIs395	25	5	2	2	2	2	0	0	1	1
FKH-8	vlcEx1243	vlc43	otIs395	25	6	0	0	2	2	2	2	2	2
FKH-8	vlcEx1243	vlc43	otIs395	25	7	2	2	2	2	2	2	2	2
FKH-8	vlcEx1243	vlc43	otIs395	25	8	2	2	2	2	1	1	2	2
FKH-8	vlcEx1243	vlc43	otIs395	25	9	2	2	2	2	2	2	2	2
FKH-8	vlcEx1243	vlc43	otIs395	25	10	2	2	2	2	2	2	2	2
FKH-8	vlcEx1243	vlc43	otIs395	25	11	2	2	2	2	2	2	2	2
FKH-8	vlcEx1243	vlc43	otIs395	25	12	2	2	2	2	2	2	0	0
FKH-8	vlcEx1243	vlc43	otIs395	25	13	2	2	1	1	2	2	2	2
FKH-8	vlcEx1243	vlc43	otIs395	25	14	2	2	2	2	2	2	2	2
FKH-8	vlcEx1243	vlc43	otIs395	25	15	2	2	2	2	2	2	2	2
FKH-8	vlcEx1243	vlc43	otIs395	25	16	2	2	1	1	2	2	2	2
FKH-8	vlcEx1243	vlc43	otIs395	25	17	2	2	2	2	2	2	2	2
FKH-8	vlcEx1243	vlc43	otIs395	25	18	2	2	2	2	2	2	2	2
FKH-8	vlcEx1243	vlc43	otIs395	25	19	2	2	2	2	2	2	2	2
FKH-8	vlcEx1243	vlc43	otIs395	25	20	2	2	2	2	2	2	2	2
FKH-8	vlcEx1243	vlc43	otIs395	25	21	2	2	2	2	2	2	2	2
FKH-8	vlcEx1243	vlc43	otIs395	25	22	2	2	2	2	2	2	2	2
FKH-8	vlcEx1243	vlc43	otIs395	25	23	2	2	2	2	2	2	2	2
FKH-8	vlcEx1243	vlc43	otIs395	25	24	2	2	2	2	2	2	2	2
FKH-8	vlcEx1243	vlc43	otIs395	25	25	2	2	2	2	2	2	2	2
FKH-8	vlcEx1243	vlc43	otIs395	25	26	2	2	2	2	2	2	2	2
FKH-8	vlcEx1243	vlc43	otIs395	25	27	1	1	2	2	2	2	2	2
FKH-8	vlcEx1243	vlc43	otIs395	25	28	2	2	2	2	2	2	1	1
FKH-8	vlcEx1243	vlc43	otIs395	25	29	2	2	2	2	1	1	2	2
FKH-8	vlcEx1243	vlc43	otIs395	25	30	2	2	1	1	2	2	2	2
FOXJ1	vlcEx1247	vlc43	otIs395	25	1	2	2	2	2	0	0	0	0
FOXJ1	vlcEx1247	vlc43	otIs395	25	2	2	2	1	1	1	1	0	0
FOXJ1	vlcEx1247	vlc43	otIs395	25	3	2	2	2	2	2	2	2	1
FOXJ1	vlcEx1247	vlc43	otIs395	25	4	1	1	1	0	2	2	0	0
FOXJ1	vlcEx1247	vlc43	otIs395	25	5	2	2	2	2	1	1	0	0
FOXJ1	vlcEx1247	vlc43	otIs395	25	6	2	2	1	1	1	1	0	0
FOXJ1	vlcEx1247	vlc43	otIs395	25	7	2	2	1	1	2	2	0	0
FOXJ1	vlcEx1247	vlc43	otIs395	25	8	1	1	2	1	0	0	0	0
FOXJ1	vlcEx1247	vlc43	otIs395	25	9	2	2	1	1	1	1	1	1
FOXJ1	vlcEx1247	vlc43	otIs395	25	10	0	0	2	1	1	1	0	0
FOXJ1	vlcEx1247	vlc43	otIs395	25	11	2	2	2	2	1	1	0	0
FOXJ1	vlcEx1247	vlc43	otIs395	25	12	1	1	2	2	1	1	0	0
FOXJ1	vlcEx1247	vlc43	otIs395	25	13	2	2	1	0	2	2	1	1
FOXJ1	vlcEx1247	vlc43	otIs395	25	14	2	2	2	2	1	1	0	0
FOXJ1	vlcEx1247	vlc43	otIs395	25	15	2	2	2	2	1	1	0	0
FOXJ1	vlcEx1247	vlc43	otIs395	25	16	2	2	2	2	1	1	1	0
FOXJ1	vlcEx1247	vlc43	otIs395	25	17	2	2	2	1	1	1	2	1
FOXJ1	vlcEx1247	vlc43	otIs395	25	18	2	2	2	2	1	1	2	0
FOXJ1	vlcEx1247	vlc43	otIs395	25	19	1	1	1	1	1	1	0	0
FOXJ1	vlcEx1247	vlc43	otIs395	25	20	2	2	2	2	2	2	0	0
FOXJ1	vlcEx1247	vlc43	otIs395	25	21	1	1	1	1	2	2	0	0
FOXJ1	vlcEx1247	vlc43	otIs395	25	22	2	2	2	2	2	2	2	2
FOXJ1	vlcEx1247	vlc43	otIs395	25	23	1	1	2	2	1	1	1	0
FOXJ1	vlcEx1247	vlc43	otIs395	25	24	1	1	1	1	2	2	2	1
FOXJ1	vlcEx1247	vlc43	otIs395	25	25	2	2	2	2	2	2	2	0
FOXJ1	vlcEx1247	vlc43	otIs395	25	26	2	2	2	2	1	1	1	1
FOXJ1	vlcEx1247	vlc43	otIs395	25	27	2	2	2	2	1	1	1	1
FOXJ1	vlcEx1247	vlc43	otIs395	25	28	2	2	2	2	0	0	0	0
FOXJ1	vlcEx1247	vlc43	otIs395	25	29	1	1	2	2	0	0	0	0
FOXJ1	vlcEx1247	vlc43	otIs395	25	30	2	2	1	1	1	1	0	0
FOXJ1	vlcEx1248	vlc43	otIs395	25	1	2	2	2	2	0	0	0	0
FOXJ1	vlcEx1248	vlc43	otIs395	25	2	2	2	2	2	2	2	2	2
FOXJ1	vlcEx1248	vlc43	otIs395	25	3	2	2	2	1	0	0	0	0
FOXJ1	vlcEx1248	vlc43	otIs395	25	4	2	2	1	1	0	0	0	0
FOXJ1	vlcEx1248	vlc43	otIs395	25	5	2	2	1	1	1	0	1	0
FOXJ1	vlcEx1248	vlc43	otIs395	25	6	2	2	2	2	0	0	0	0
FOXJ1	vlcEx1248	vlc43	otIs395	25	7	0	0	1	1	0	0	0	0
FOXJ1	vlcEx1248	vlc43	otIs395	25	8	2	2	2	2	1	1	0	0
FOXJ1	vlcEx1248	vlc43	otIs395	25	9	2	2	2	2	1	1	1	1
FOXJ1	vlcEx1248	vlc43	otIs395	25	10	2	2	1	1	1	0	1	1
FOXJ1	vlcEx1248	vlc43	otIs395	25	11	2	2	1	0	1	1	0	0
FOXJ1	vlcEx1248	vlc43	otIs395	25	12	2	2	2	2	1	1	0	0
FOXJ1	vlcEx1248	vlc43	otIs395	25	13	2	2	1	1	1	1	1	1
FOXJ1	vlcEx1248	vlc43	otIs395	25	14	2	2	2	2	1	1	0	0
FOXJ1	vlcEx1248	vlc43	otIs395	25	15	1	1	2	2	0	0	1	1
FOXJ1	vlcEx1248	vlc43	otIs395	25	16	2	2	1	1	0	0	0	0
FOXJ1	vlcEx1248	vlc43	otIs395	25	17	2	2	2	2	1	1	0	0
FOXJ1	vlcEx1248	vlc43	otIs395	25	18	2	2	1	1	1	1	1	1
FOXJ1	vlcEx1248	vlc43	otIs395	25	19	2	2	2	2	1	1	0	0
FOXJ1	vlcEx1248	vlc43	otIs395	25	20	2	2	1	1	0	0	1	1
FOXJ1	vlcEx1248	vlc43	otIs395	25	21	1	1	2	2	0	0	1	0
FOXJ1	vlcEx1248	vlc43	otIs395	25	22	2	2	2	2	0	0	0	0
FOXJ1	vlcEx1248	vlc43	otIs395	25	23	2	2	2	2	2	2	1	1
FOXJ1	vlcEx1248	vlc43	otIs395	25	24	1	1	1	1	1	1	0	0
FOXJ1	vlcEx1248	vlc43	otIs395	25	25	2	2	2	2	2	1	1	1
FOXJ1	vlcEx1248	vlc43	otIs395	25	26	2	2	2	1	2	2	0	0
FOXJ1	vlcEx1248	vlc43	otIs395	25	27	2	2	1	1	1	1	0	0
FOXJ1	vlcEx1248	vlc43	otIs395	25	28	2	2	2	2	1	1	0	0
FOXJ1	vlcEx1248	vlc43	otIs395	25	29	2	2	2	2	0	0	0	0
FOXJ1	vlcEx1248	vlc43	otIs395	25	30	2	2	0	0	1	1	0	0
FOXJ1	vlcEx1249	vlc43	otIs395	25	1	2	2	2	2	2	2	1	1
FOXJ1	vlcEx1249	vlc43	otIs395	25	2	2	2	1	1	1	1	0	0
FOXJ1	vlcEx1249	vlc43	otIs395	25	3	1	1	1	1	0	0	0	0
FOXJ1	vlcEx1249	vlc43	otIs395	25	4	1	1	2	2	1	1	0	0
FOXJ1	vlcEx1249	vlc43	otIs395	25	5	2	2	1	1	1	1	0	0
FOXJ1	vlcEx1249	vlc43	otIs395	25	6	2	2	2	2	2	2	1	1
FOXJ1	vlcEx1249	vlc43	otIs395	25	7	1	1	1	1	0	0	1	1
FOXJ1	vlcEx1249	vlc43	otIs395	25	8	1	1	2	2	0	0	0	0
FOXJ1	vlcEx1249	vlc43	otIs395	25	9	2	2	1	1	1	1	0	0
FOXJ1	vlcEx1249	vlc43	otIs395	25	10	1	1	2	2	0	0	0	0
FOXJ1	vlcEx1249	vlc43	otIs395	25	11	1	1	2	2	1	1	0	0
FOXJ1	vlcEx1249	vlc43	otIs395	25	12	2	2	1	1	1	1	1	0
FOXJ1	vlcEx1249	vlc43	otIs395	25	13	1	1	1	1	0	0	0	0
FOXJ1	vlcEx1249	vlc43	otIs395	25	14	2	2	1	1	2	2	1	0
FOXJ1	vlcEx1249	vlc43	otIs395	25	15	2	2	2	2	1	1	0	0
FOXJ1	vlcEx1249	vlc43	otIs395	25	16	2	2	1	1	1	1	1	0
FOXJ1	vlcEx1249	vlc43	otIs395	25	17	1	1	2	2	0	0	1	1
FOXJ1	vlcEx1249	vlc43	otIs395	25	18	1	1	2	2	1	0	0	0
FOXJ1	vlcEx1249	vlc43	otIs395	25	19	1	1	2	2	1	1	0	0
FOXJ1	vlcEx1249	vlc43	otIs395	25	20	1	1	2	2	0	0	0	0
FOXJ1	vlcEx1249	vlc43	otIs395	25	21	2	2	2	2	1	1	0	0
FOXJ1	vlcEx1249	vlc43	otIs395	25	22	1	1	1	1	1	1	1	0
FOXJ1	vlcEx1249	vlc43	otIs395	25	23	2	2	1	1	1	1	0	0
FOXJ1	vlcEx1249	vlc43	otIs395	25	24	1	1	2	2	0	0	0	0
FOXJ1	vlcEx1249	vlc43	otIs395	25	25	2	2	1	0	0	0	0	0
FOXJ1	vlcEx1249	vlc43	otIs395	25	26	1	1	2	2	0	0	0	0
FOXJ1	vlcEx1249	vlc43	otIs395	25	27	1	1	2	2	0	0	0	0
FOXJ1	vlcEx1249	vlc43	otIs395	25	28	2	2	2	2	0	0	0	0
FOXJ1	vlcEx1249	vlc43	otIs395	25	29	2	2	1	1	0	0	0	0
FOXJ1	vlcEx1249	vlc43	otIs395	25	30	2	2	1	1	1	2	0	0
FOXN4	vlcEx1244	vlc43	otIs395	25	1	2	2	2	2	2	2	1	1
FOXN4	vlcEx1244	vlc43	otIs395	25	2	1	1	2	2	2	0	0	0
FOXN4	vlcEx1244	vlc43	otIs395	25	3	2	2	2	2	2	2	2	2
FOXN4	vlcEx1244	vlc43	otIs395	25	4	0	0	1	1	0	0	0	0
FOXN4	vlcEx1244	vlc43	otIs395	25	5	2	2	2	2	1	1	1	0
FOXN4	vlcEx1244	vlc43	otIs395	25	6	2	2	2	2	2	2	0	0
FOXN4	vlcEx1244	vlc43	otIs395	25	7	2	2	2	1	1	1	1	0
FOXN4	vlcEx1244	vlc43	otIs395	25	8	2	2	2	1	2	2	0	0
FOXN4	vlcEx1244	vlc43	otIs395	25	9	2	2	1	1	0	0	0	0
FOXN4	vlcEx1244	vlc43	otIs395	25	10	1	1	2	2	1	1	0	0
FOXN4	vlcEx1244	vlc43	otIs395	25	11	2	2	2	2	1	1	0	0
FOXN4	vlcEx1244	vlc43	otIs395	25	12	1	1	2	2	1	1	1	0
FOXN4	vlcEx1244	vlc43	otIs395	25	13	2	2	2	2	2	1	1	0
FOXN4	vlcEx1244	vlc43	otIs395	25	14	2	2	2	1	1	1	1	0
FOXN4	vlcEx1244	vlc43	otIs395	25	15	2	2	2	0	1	1	1	0
FOXN4	vlcEx1244	vlc43	otIs395	25	16	2	2	2	0	0	0	0	0
FOXN4	vlcEx1244	vlc43	otIs395	25	17	1	1	2	1	1	1	2	0
FOXN4	vlcEx1244	vlc43	otIs395	25	18	1	1	2	2	0	0	1	0
FOXN4	vlcEx1244	vlc43	otIs395	25	19	2	2	2	0	1	1	1	0
FOXN4	vlcEx1244	vlc43	otIs395	25	20	2	1	2	1	1	1	1	1
FOXN4	vlcEx1244	vlc43	otIs395	25	21	2	2	1	1	1	1	1	0
FOXN4	vlcEx1244	vlc43	otIs395	25	22	1	1	2	2	1	1	0	0
FOXN4	vlcEx1244	vlc43	otIs395	25	23	2	2	2	2	2	2	0	0
FOXN4	vlcEx1244	vlc43	otIs395	25	24	2	2	2	1	2	2	1	0
FOXN4	vlcEx1244	vlc43	otIs395	25	25	2	2	2	2	1	0	2	0
FOXN4	vlcEx1244	vlc43	otIs395	25	26	2	2	2	2	1	1	0	0
FOXN4	vlcEx1244	vlc43	otIs395	25	27	2	2	2	0	2	2	0	0
FOXN4	vlcEx1244	vlc43	otIs395	25	28	2	2	2	2	1	1	1	1
FOXN4	vlcEx1244	vlc43	otIs395	25	29	2	2	2	2	1	1	1	0
FOXN4	vlcEx1244	vlc43	otIs395	25	30	2	2	2	2	0	0	1	0
FOXN4	vlcEx1245	vlc43	otIs395	25	1	1	1	0	0	0	0	1	0
FOXN4	vlcEx1245	vlc43	otIs395	25	2	2	2	2	1	2	2	1	1
FOXN4	vlcEx1245	vlc43	otIs395	25	3	1	1	1	1	1	1	1	0
FOXN4	vlcEx1245	vlc43	otIs395	25	4	2	2	2	1	1	1	1	0
FOXN4	vlcEx1245	vlc43	otIs395	25	5	1	1	2	2	1	1	1	0
FOXN4	vlcEx1245	vlc43	otIs395	25	6	2	2	1	1	2	2	1	1
FOXN4	vlcEx1245	vlc43	otIs395	25	7	2	2	2	2	2	1	2	0
FOXN4	vlcEx1245	vlc43	otIs395	25	8	2	2	2	2	1	1	2	0
FOXN4	vlcEx1245	vlc43	otIs395	25	9	0	0	2	2	2	1	1	0
FOXN4	vlcEx1245	vlc43	otIs395	25	10	2	2	1	1	1	0	0	0
FOXN4	vlcEx1245	vlc43	otIs395	25	11	2	2	1	1	0	0	1	0
FOXN4	vlcEx1245	vlc43	otIs395	25	12	2	2	2	1	1	1	1	1
FOXN4	vlcEx1245	vlc43	otIs395	25	13	2	2	2	2	1	1	1	0
FOXN4	vlcEx1245	vlc43	otIs395	25	14	2	2	2	2	2	2	1	0
FOXN4	vlcEx1245	vlc43	otIs395	25	15	2	2	1	1	1	1	0	0
FOXN4	vlcEx1245	vlc43	otIs395	25	16	1	1	2	2	1	1	1	1
FOXN4	vlcEx1245	vlc43	otIs395	25	17	1	1	2	2	1	1	1	0
FOXN4	vlcEx1245	vlc43	otIs395	25	18	2	2	2	0	2	2	1	0
FOXN4	vlcEx1245	vlc43	otIs395	25	19	2	2	2	2	2	2	2	2
FOXN4	vlcEx1245	vlc43	otIs395	25	20	2	2	2	2	2	2	1	0
FOXN4	vlcEx1245	vlc43	otIs395	25	21	1	1	0	0	1	1	0	0
FOXN4	vlcEx1245	vlc43	otIs395	25	22	2	2	1	1	2	1	1	0
FOXN4	vlcEx1245	vlc43	otIs395	25	23	2	2	1	1	1	1	0	0
FOXN4	vlcEx1245	vlc43	otIs395	25	24	2	2	2	2	2	2	1	0
FOXN4	vlcEx1245	vlc43	otIs395	25	25	1	1	1	1	2	2	1	0
FOXN4	vlcEx1245	vlc43	otIs395	25	26	2	2	1	0	2	2	1	0
FOXN4	vlcEx1245	vlc43	otIs395	25	27	2	2	1	1	1	1	0	0
FOXN4	vlcEx1245	vlc43	otIs395	25	28	2	2	2	2	1	1	1	0
FOXN4	vlcEx1245	vlc43	otIs395	25	29	1	1	2	2	0	0	2	1
FOXN4	vlcEx1245	vlc43	otIs395	25	30	2	2	2	2	2	2	1	0
FOXN4	vlcEx1246	vlc43	otIs395	25	1	1	1	2	2	1	1	1	0
FOXN4	vlcEx1246	vlc43	otIs395	25	2	2	2	2	2	1	1	1	0
FOXN4	vlcEx1246	vlc43	otIs395	25	3	2	2	2	2	2	2	0	0
FOXN4	vlcEx1246	vlc43	otIs395	25	4	1	1	2	2	1	1	0	0
FOXN4	vlcEx1246	vlc43	otIs395	25	5	2	2	2	2	2	2	1	1
FOXN4	vlcEx1246	vlc43	otIs395	25	6	2	2	2	2	2	2	1	0
FOXN4	vlcEx1246	vlc43	otIs395	25	7	1	1	2	1	0	0	0	0
FOXN4	vlcEx1246	vlc43	otIs395	25	8	2	2	2	2	2	2	2	1
FOXN4	vlcEx1246	vlc43	otIs395	25	9	2	2	2	1	2	2	0	0
FOXN4	vlcEx1246	vlc43	otIs395	25	10	2	2	1	0	2	2	0	0
FOXN4	vlcEx1246	vlc43	otIs395	25	11	2	2	2	2	2	2	0	0
FOXN4	vlcEx1246	vlc43	otIs395	25	12	2	2	2	1	2	2	2	0
FOXN4	vlcEx1246	vlc43	otIs395	25	13	2	2	2	2	2	2	1	1
FOXN4	vlcEx1246	vlc43	otIs395	25	14	2	2	2	2	1	1	2	0
FOXN4	vlcEx1246	vlc43	otIs395	25	15	2	2	2	2	0	0	2	1
FOXN4	vlcEx1246	vlc43	otIs395	25	16	2	2	1	1	1	1	0	0
FOXN4	vlcEx1246	vlc43	otIs395	25	17	2	2	2	2	1	1	2	0
FOXN4	vlcEx1246	vlc43	otIs395	25	18	2	2	2	0	1	1	2	0
FOXN4	vlcEx1246	vlc43	otIs395	25	19	2	2	2	2	2	2	1	1
FOXN4	vlcEx1246	vlc43	otIs395	25	20	2	2	2	2	1	1	1	0
FOXN4	vlcEx1246	vlc43	otIs395	25	21	2	2	1	1	2	2	2	0
FOXN4	vlcEx1246	vlc43	otIs395	25	22	2	2	1	1	1	1	1	0
FOXN4	vlcEx1246	vlc43	otIs395	25	23	2	2	1	1	1	1	2	2
FOXN4	vlcEx1246	vlc43	otIs395	25	24	2	2	2	2	2	2	2	0
FOXN4	vlcEx1246	vlc43	otIs395	25	25	2	2	2	0	1	1	2	1
FOXN4	vlcEx1246	vlc43	otIs395	25	26	2	2	2	0	2	2	0	0
FOXN4	vlcEx1246	vlc43	otIs395	25	27	2	2	2	2	1	1	0	0
FOXN4	vlcEx1246	vlc43	otIs395	25	28	2	2	1	1	2	2	1	1
FOXN4	vlcEx1246	vlc43	otIs395	25	29	2	2	1	0	1	1	2	2
FOXN4	vlcEx1246	vlc43	otIs395	25	30	2	2	0	0	1	1	0	0
FOXI1	vlcEx1250	vlc43	otIs395	25	1	2	0	2	1	1	0	0	0
FOXI1	vlcEx1250	vlc43	otIs395	25	2	1	0	1	0	2	0	0	0
FOXI1	vlcEx1250	vlc43	otIs395	25	3	2	0	2	0	1	0	0	0
FOXI1	vlcEx1250	vlc43	otIs395	25	4	2	0	2	0	1	0	2	0
FOXI1	vlcEx1250	vlc43	otIs395	25	5	1	0	2	0	0	0	1	0
FOXI1	vlcEx1250	vlc43	otIs395	25	6	2	0	2	0	1	0	1	0
FOXI1	vlcEx1250	vlc43	otIs395	25	7	2	0	2	0	1	0	1	0
FOXI1	vlcEx1250	vlc43	otIs395	25	8	1	0	1	0	1	0	1	0
FOXI1	vlcEx1250	vlc43	otIs395	25	9	2	0	2	0	2	0	1	0
FOXI1	vlcEx1250	vlc43	otIs395	25	10	2	0	2	0	2	0	2	0
FOXI1	vlcEx1250	vlc43	otIs395	25	11	2	0	2	0	0	0	1	0
FOXI1	vlcEx1250	vlc43	otIs395	25	12	2	0	2	0	2	0	1	0
FOXI1	vlcEx1250	vlc43	otIs395	25	13	1	0	1	0	1	0	1	0
FOXI1	vlcEx1250	vlc43	otIs395	25	14	2	0	2	0	2	0	1	0
FOXI1	vlcEx1250	vlc43	otIs395	25	15	2	0	2	0	2	0	1	0
FOXI1	vlcEx1250	vlc43	otIs395	25	16	1	0	2	0	2	0	0	0
FOXI1	vlcEx1250	vlc43	otIs395	25	17	2	0	2	0	2	0	1	0
FOXI1	vlcEx1250	vlc43	otIs395	25	18	1	0	2	0	1	0	1	0
FOXI1	vlcEx1250	vlc43	otIs395	25	19	2	0	2	0	1	0	0	0
FOXI1	vlcEx1250	vlc43	otIs395	25	20	2	0	1	0	2	0	1	0
FOXI1	vlcEx1250	vlc43	otIs395	25	21	2	0	1	0	2	0	1	0
FOXI1	vlcEx1250	vlc43	otIs395	25	22	2	0	1	0	2	0	2	0
FOXI1	vlcEx1250	vlc43	otIs395	25	23	1	0	2	0	2	0	0	0
FOXI1	vlcEx1250	vlc43	otIs395	25	24	1	0	2	0	2	0	1	0
FOXI1	vlcEx1250	vlc43	otIs395	25	25	1	0	2	0	1	0	0	0
FOXI1	vlcEx1250	vlc43	otIs395	25	26	2	0	1	0	1	0	1	0
FOXI1	vlcEx1250	vlc43	otIs395	25	27	2	0	2	0	2	0	0	0
FOXI1	vlcEx1250	vlc43	otIs395	25	28	2	0	2	0	2	0	0	0
FOXI1	vlcEx1250	vlc43	otIs395	25	29	2	0	2	0	1	0	0	0
FOXI1	vlcEx1250	vlc43	otIs395	25	30	2	0	2	0	1	0	0	0
FOXI1	vlcEx1283	vlc43	otIs395	25	1	2	0	1	0	1	0	1	0
FOXI1	vlcEx1283	vlc43	otIs395	25	2	2	0	2	0	2	0	1	0
FOXI1	vlcEx1283	vlc43	otIs395	25	3	2	0	1	0	1	0	1	0
FOXI1	vlcEx1283	vlc43	otIs395	25	4	1	0	2	0	0	0	1	0
FOXI1	vlcEx1283	vlc43	otIs395	25	5	2	0	2	0	2	0	2	0
FOXI1	vlcEx1283	vlc43	otIs395	25	6	2	1	2	0	0	0	1	0
FOXI1	vlcEx1283	vlc43	otIs395	25	7	1	0	2	0	2	0	2	0
FOXI1	vlcEx1283	vlc43	otIs395	25	8	2	0	2	2	2	1	1	0
FOXI1	vlcEx1283	vlc43	otIs395	25	9	2	0	2	0	2	0	0	0
FOXI1	vlcEx1283	vlc43	otIs395	25	10	2	0	2	0	2	0	1	0
FOXI1	vlcEx1283	vlc43	otIs395	25	11	1	1	2	0	1	0	1	0
FOXI1	vlcEx1283	vlc43	otIs395	25	12	1	0	2	0	2	0	0	0
FOXI1	vlcEx1283	vlc43	otIs395	25	13	1	0	2	0	2	0	1	0
FOXI1	vlcEx1283	vlc43	otIs395	25	14	0	0	2	0	2	2	1	0
FOXI1	vlcEx1283	vlc43	otIs395	25	15	2	0	2	0	2	0	1	0
FOXI1	vlcEx1283	vlc43	otIs395	25	16	2	0	2	0	0	0	0	0
FOXI1	vlcEx1283	vlc43	otIs395	25	17	2	0	2	0	1	0	1	0
FOXI1	vlcEx1283	vlc43	otIs395	25	18	0	0	2	0	2	0	2	0
FOXI1	vlcEx1283	vlc43	otIs395	25	19	0	0	2	0	1	1	1	0
FOXI1	vlcEx1283	vlc43	otIs395	25	20	2	0	2	0	1	0	2	0
FOXI1	vlcEx1283	vlc43	otIs395	25	21	2	0	2	0	2	1	1	0
FOXI1	vlcEx1283	vlc43	otIs395	25	22	2	0	2	0	2	0	1	0
FOXI1	vlcEx1283	vlc43	otIs395	25	23	2	0	2	0	1	0	1	0
FOXI1	vlcEx1283	vlc43	otIs395	25	24	2	0	1	0	0	0	1	0
FOXI1	vlcEx1283	vlc43	otIs395	25	25	0	0	2	0	2	0	0	0
FOXI1	vlcEx1283	vlc43	otIs395	25	26	2	0	1	0	2	0	1	0
FOXI1	vlcEx1283	vlc43	otIs395	25	27	2	0	1	0	0	0	1	0
FOXI1	vlcEx1283	vlc43	otIs395	25	28	2	0	2	0	1	0	2	0
FOXI1	vlcEx1283	vlc43	otIs395	25	29	0	0	2	0	1	0	1	0
FOXI1	vlcEx1283	vlc43	otIs395	25	30	2	0	1	0	2	0	2	0
FOXI1	vlcEx1284	vlc43	otIs395	25	1	1	0	2	0	1	0	0	0
FOXI1	vlcEx1284	vlc43	otIs395	25	2	2	0	2	0	2	0	2	0
FOXI1	vlcEx1284	vlc43	otIs395	25	3	2	0	2	0	2	0	1	0
FOXI1	vlcEx1284	vlc43	otIs395	25	4	2	0	1	0	2	0	0	0
FOXI1	vlcEx1284	vlc43	otIs395	25	5	2	0	2	0	1	0	0	0
FOXI1	vlcEx1284	vlc43	otIs395	25	6	1	0	2	0	2	0	2	0
FOXI1	vlcEx1284	vlc43	otIs395	25	7	2	0	2	0	2	0	2	0
FOXI1	vlcEx1284	vlc43	otIs395	25	8	2	0	2	0	2	0	1	0
FOXI1	vlcEx1284	vlc43	otIs395	25	9	2	0	2	0	2	0	1	0
FOXI1	vlcEx1284	vlc43	otIs395	25	10	0	0	2	0	1	0	0	0
FOXI1	vlcEx1284	vlc43	otIs395	25	11	2	0	2	0	1	0	0	0
FOXI1	vlcEx1284	vlc43	otIs395	25	12	1	0	2	0	2	0	2	0
FOXI1	vlcEx1284	vlc43	otIs395	25	13	1	0	2	0	2	0	0	0
FOXI1	vlcEx1284	vlc43	otIs395	25	14	1	0	2	0	2	0	2	0
FOXI1	vlcEx1284	vlc43	otIs395	25	15	2	0	2	0	1	0	1	0
FOXI1	vlcEx1284	vlc43	otIs395	25	16	2	0	2	0	2	0	1	0
FOXI1	vlcEx1284	vlc43	otIs395	25	17	2	0	2	0	2	0	1	0
FOXI1	vlcEx1284	vlc43	otIs395	25	18	1	0	2	0	1	0	1	0
FOXI1	vlcEx1284	vlc43	otIs395	25	19	1	0	2	0	2	0	0	0
FOXI1	vlcEx1284	vlc43	otIs395	25	20	2	0	2	0	2	0	2	0
FOXI1	vlcEx1284	vlc43	otIs395	25	21	2	0	2	0	2	0	1	0
FOXI1	vlcEx1284	vlc43	otIs395	25	22	2	0	2	0	2	0	2	0
FOXI1	vlcEx1284	vlc43	otIs395	25	23	1	0	2	0	1	0	2	0
FOXI1	vlcEx1284	vlc43	otIs395	25	24	2	0	2	0	2	0	2	0
FOXI1	vlcEx1284	vlc43	otIs395	25	25	2	0	2	0	1	0	1	0
FOXI1	vlcEx1284	vlc43	otIs395	25	26	1	0	2	0	1	1	1	1
FOXI1	vlcEx1284	vlc43	otIs395	25	27	2	0	1	0	2	0	1	0
FOXI1	vlcEx1284	vlc43	otIs395	25	28	1	0	2	0	1	0	1	0
FOXI1	vlcEx1284	vlc43	otIs395	25	29	1	0	1	0	1	0	0	0
FOXI1	vlcEx1284	vlc43	otIs395	25	30	2	0	2	0	1	0	2	0

## Sheet: F7 C pval
ift-20 (+)
			CEPV				CEPD				ADE				PDE
Background	Rescue	Array	NO	YES	vs. WT	vs. vlc43	NO	YES	vs. WT	vs. vlc43	NO	YES	vs. WT	vs. vlc43	NO	YES	vs. WT	vs. vlc43
wild type	None	None	0	60		1.88084e-27	4	56		1.9134e-26	10	50		8.21208e-24	6	54		1.88084e-27
vlc43	None	None	54	6	1.88084e-27		58	2	1.9134e-26		60	0	8.21208e-24		60	0	1.88084e-27
vlc43	FKH-8	vlcEx1241	3	57	0.243697	4.13878e-23	1	59	0.364361	2.23632e-30	4	56	0.153257	1.31528e-29	2	58	0.272163	3.91451e-32
vlc43	FKH-8	vlcEx1242	4	56	0.118724	5.44065e-22	1	59	0.364361	2.23632e-30	2	58	0.0294813	3.91451e-32	9	51	0.582221	1.17315e-24
vlc43	FKH-8	vlcEx1243	4	56	0.118724	5.44065e-22	3	57	1	1.27696e-27	4	56	0.153257	1.31528e-29	5	55	1	1.70986e-28
vlc43	FOXJ1	vlcEx1247	10	50	0.00129913	1.0402e-16	15	45	0.010902	3.29046e-17	25	35	0.00454205	4.51823e-14	51	9	1.81193e-17	0.00282753
vlc43	FOXJ1	vlcEx1248	5	55	0.0573152	5.81082e-21	16	44	0.00597166	1.45853e-16	40	20	3.79912e-08	2.84557e-07	50	10	1.0402e-16	0.00129913
vlc43	FOXJ1	vlcEx1249	15	45	2.24897e-05	2.19059e-13	15	45	0.010902	3.29046e-17	40	20	3.79912e-08	2.84557e-07	56	4	5.44065e-22	0.118724
vlc43	FOXN4	vlcEx1244	9	51	0.00282753	1.81193e-17	17	43	0.00319832	6.16137e-16	30	30	0.0001905	1.39343e-11	55	5	5.81082e-21	0.0573152
vlc43	FOXN4	vlcEx1245	10	50	0.00129913	1.0402e-16	20	40	0.000431157	3.58822e-14	24	36	0.00792149	1.32889e-14	53	7	4.12731e-19	0.0129845
vlc43	FOXN4	vlcEx1246	3	57	0.243697	4.13878e-23	20	40	0.000431157	3.58822e-14	18	42	0.129975	4.40028e-18	49	11	5.50258e-16	0.000590515
vlc43	FOXI1	vlcEx1250	60	0	2.07007e-35	0.0274116	59	1	7.03672e-28	1	60	0	8.21208e-24	1	60	0	1.88084e-27	1
vlc43	FOXI1	vlcEx1283	58	2	3.91451e-32	0.272163	58	2	1.9134e-26	1	55	5	1.31198e-17	0.0573152	60	0	1.88084e-27	1
vlc43	FOXI1	vlcEx1284	60	0	2.07007e-35	0.0274116	60	0	1.31528e-29	0.495798	59	1	3.60158e-22	1	59	1	9.42132e-26	1
