# Supplementary material for: Forkhead transcription factor FKH-8 cooperates with RFX in the direct regulation of sensory cilia in Caenorhabditis elegans
Source: eLife. 2023 Jul 14;12:e89702. doi: 10.7554/eLife.89702 (PMC10393296; doi:10.7554/eLife.89702)
Supplement: Supplementary file 1. [file elife-89702-supp1.xlsx]

## Sheet: Strains
Figure	Strain	Genotype	Source
-	N2	wild type	CGC
-	JT204	daf-12(sa204) X	CGC
-	JT6924	daf-12(sa204) X; daf-19(m86) II	CGC
1	NFB1426	vlcEx827(che-11p::NLS::gfp, rol-6(su1006))	This work
1	NFB2113	vlcEx827(che-11p::NLS::gfp, rol-6(su1006)); daf-12(sa204)	This work
1	NFB2098	vlcEx827(che-11p::NLS::gfp, rol-6(su1006)); daf-12(sa204); daf-19(m86)	This work
1	NFB1411	vlcEx812(che-13p::NLS::gfp, rol-6(su1006))	This work
1	NFB2114	vlcEx812(che-13p::NLS::gfp, rol-6(su1006)); daf-12(sa204)	This work
1	NFB2099	vlcEx812(che-13p::NLS::gfp, rol-6(su1006)); daf-12(sa204); daf-19(m86)	This work
1	NFB2084	vlcEx1133(osm-5p::NLS::gfp, rol-6(su1006))	This work
1	NFB2120	vlcEx1133(osm-5p::NLS::gfp, rol-6(su1006)); daf-12(sa204)	This work
1	NFB2105	vlcEx1133(osm-5p::NLS::gfp, rol-6(su1006)); daf-12(sa204); daf-19(m86)	This work
1	-	otIs395(ift-20p::NLS::tagRFP + pha-1(+)); him-5(e1490) V	Hobert Lab
1	NFB2128	otIs395(ift-20p::NLS::tagRFP + pha-1(+)); daf-12(sa204)	This work
1	NFB2019	otIs395(ift-20p::NLS::tagRFP + pha-1(+)); daf-12(sa204); daf-19(m86)	This work
1	NFB1462	vlcEx835(peli-1p::NLS::gfp, rol-6(su1006))	This work
1	NFB2122	vlcEx835(peli-1p::NLS::gfp, rol-6(su1006)); daf-12(sa204)	This work
1	NFB2107	vlcEx835(peli-1p::NLS::gfp, rol-6(su1006)); daf-12(sa204); daf-19(m86)	This work
1	NFB1423	vlcEx824(peli-1p::NLS::gfp, rol-6(su1006)); otIs395(ift-20p::NLS::tagRFP + pha-1(+))	This work
1	NFB2123	vlcEx824(peli-1p::NLS::gfp, rol-6(su1006)); otIs395(ift-20p::NLS::tagRFP + pha-1(+)); daf-12(sa204)	This work
1	NFB2108	vlcEx824(peli-1p::NLS::gfp, rol-6(su1006)); otIs395(ift-20p::NLS::tagRFP + pha-1(+)); daf-12(sa204); daf-19(m86)	This work
1	NFB2091	vlcEx1137(xbx-1p::NLS::gfp, rol-6(su1006))	This work
1	NFB2126	vlcEx1137(xbx-1p::NLS::gfp, rol-6(su1006)); daf-12(sa204)	This work
1	NFB2111	vlcEx1137(xbx-1p::NLS::gfp, rol-6(su1006)); daf-12(sa204); daf-19(m86)	This work
1	NFB1421	vlcEx822(xbx-1p::NLS::gfp, rol-6(su1006))	This work
1	NFB2127	vlcEx822(xbx-1p::NLS::gfp, rol-6(su1006)); daf-12(sa204)	This work
1	NFB2112	vlcEx822(xbx-1p::NLS::gfp, rol-6(su1006)); daf-12(sa204); daf-19(m86)	This work
1	NFB2088	vlcEx1135(tmem-107p::NLS::gfp, rol-6(su1006))	This work
1	NFB2124	vlcEx1135(tmem-107p::NLS::gfp, rol-6(su1006)); daf-12(sa204)	This work
1	NFB2109	vlcEx1135(tmem-107p::NLS::gfp, rol-6(su1006)); daf-12(sa204); daf-19(m86)	This work
1	NFB1420	vlcEx821(tub-1p::NLS::gfp, rol-6(su1006))	This work
1	NFB2125	vlcEx821(tub-1p::NLS::gfp, rol-6(su1006)); daf-12(sa204)	This work
1	NFB2110	vlcEx821(tub-1p::NLS::gfp, rol-6(su1006)); daf-12(sa204); daf-19(m86)	This work
1	NFB2081	vlcEx1131(mks-1p::NLS::gfp, rol-6(su1006))	This work
1	NFB2115	vlcEx1131(mks-1p::NLS::gfp, rol-6(su1006)); daf-12(sa204)	This work
1	NFB2100	vlcEx1131(mks-1p::NLS::gfp, rol-6(su1006)); daf-12(sa204); daf-19(m86)	This work
1	NFB1414	vlcEx815(osm-1p::NLS::gfp, rol-6(su1006))	This work
1	NFB2119	vlcEx815(osm-1p::NLS::gfp, rol-6(su1006)); daf-12(sa204)	This work
1	NFB2104	vlcEx815(osm-1p::NLS::gfp, rol-6(su1006)); daf-12(sa204); daf-19(m86)	This work
2	OP652	wgIs652 (fkh-8::TY1::EGFP::3xFLAG + unc-119(+)); unc-119(tm4063) III	CGC
2	NFB2055	wgIs652 (fkh-8::TY1::EGFP::3xFLAG + unc-119(+)); otIs395(ift-20p::NLS::tagRFP + pha-1(+))	This work
S4	BC13336	sIs13113 (rCesY110A7A.20::GFP + pCeh361); dpy-5(e907) I	CGC
-	-	fkh-8(tm292) II	National BioResource Project
-	NFB2057	fkh-8(vlc43) II	This work
3	NFB1776	otIs395(ift-20p::NLS::tagRFP + pha-1(+)); fkh-8(tm292) II	This work
3	NFB2057	otIs395(ift-20p::NLS::tagRFP + pha-1(+)); fkh-8(vlc43) II	This work
3	NFB2132	vlcEx815(osm-1p::NLS::gfp, rol-6(su1006)); fkh-8(tm292) II	This work
3	NFB2235	vlcEx815(osm-1p::NLS::gfp, rol-6(su1006)); fkh-8(vlc43) II	This work
3	NFB2138	vlcEx821(tub-1p::NLS::gfp, rol-6(su1006)); fkh-8(tm292) II	This work
3	NFB2145	vlcEx821(tub-1p::NLS::gfp, rol-6(su1006)); fkh-8(vlc43) II	This work
3	NFB2140	vlcEx822(xbx-1p::NLS::gfp, rol-6(su1006)); fkh-8(tm292) II	This work
3	NFB2147	vlcEx822(xbx-1p::NLS::gfp, rol-6(su1006)); fkh-8(vlc43) II	This work
3	NFB2139	vlcEx1137(xbx-1p::NLS::gfp, rol-6(su1006)); fkh-8(tm292) II	This work
3	NFB2146	vlcEx1137(xbx-1p::NLS::gfp, rol-6(su1006)); fkh-8(vlc43) II	This work
3	NFB2136	vlcEx824(peli-1p::NLS::gfp, rol-6(su1006)); otIs395(ift-20p::NLS::tagRFP + pha-1(+)); fkh-8(tm292) II	This work
3	NFB2143	vlcEx824(peli-1p::NLS::gfp, rol-6(su1006)); otIs395(ift-20p::NLS::tagRFP + pha-1(+)); fkh-8(vlc43) II	This work
3	NFB2135	vlcEx835(peli-1p::NLS::gfp, rol-6(su1006)); fkh-8(tm292) II	This work
3	NFB2142	vlcEx835(peli-1p::NLS::gfp, rol-6(su1006)); fkh-8(vlc43) II	This work
3	NFB2133	vlcEx1133(osm-5p::NLS::gfp, rol-6(su1006)); fkh-8(tm292) II	This work
3	NFB2155	vlcEx1133(osm-5p::NLS::gfp, rol-6(su1006)); fkh-8(vlc43) II	This work
3	PHX6528	osm-5(syb6528[osm-5::SL2::GFP::H2B)] X	SunyBiotech
3	NFB2682	osm-5(syb6528[osm-5::SL2::GFP::H2B]) X; him-8(e1489)IV	This work
3	NFB2683	osm-5(syb6528[osm-5::SL2::GFP::H2B]) X; fkh-8(vlc43) II; him-8(e1489)IV	This work
S7	NFB2092	vlcEx1138(xbx-1p::NLS::gfp, rol-6(su1006))	This work
S7	NFB2093	vlcEx1139(xbx-1p::NLS::gfp, rol-6(su1006))	This work
S7	NFB2095	vlcEx1140(xbx-1p::NLS::gfp, rol-6(su1006))	This work
S7	NFB2096	vlcEx1141(xbx-1p::NLS::gfp, rol-6(su1006))	This work
S7	NFB2097	vlcEx1142(xbx-1p::NLS::gfp, rol-6(su1006))	This work
S7	NFB2410	vlcEx1262(ift-20p::NLS::gfp, rol-6(su1006))	This work
S7	NFB2411	vlcEx1263(ift-20p::NLS::gfp, rol-6(su1006))	This work
S7	NFB2459	vlcEx1285(ift-20p::NLS::gfp, rol-6(su1006))	This work
S7	NFB2444	vlcEx1280(ift-20p::NLS::gfp, rol-6(su1006))	This work
S7	NFB2445	vlcEx1281(ift-20p::NLS::gfp, rol-6(su1006))	This work
S7	NFB2446	vlcEx1282(ift-20p::NLS::gfp, rol-6(su1006))	This work
-	OH13645	otIs518 (eat-4(fosmid)::SL2::mCherry::H2B + pha-1(+)); pha-1(e2123) III; him-5(e1490) V	Hobert Lab
-	EO5	daf-19(of5) II	Swoboda Lab
4	NFB2237	wgIs652 (fkh-8::TY1::EGFP::3xFLAG + unc-119(+)); otIs518 (eat-4(fosmid)::SL2::mCherry::H2B + pha-1(+)); daf-12(sa204); daf-19(m86)	This work
4	NFB2456	wgIs652 (fkh-8::TY1::EGFP::3xFLAG + unc-119(+)); daf-19(of5) II	This work
-	OH7193	otIs181(dat-1::mCherry + ttx-3::mCherry)III; him-8(e1489)IV	Hobert Lab
4	NFB2476	wgIs652 (fkh-8::TY1::EGFP::3xFLAG + unc-119(+)); otIs181(dat-1::mCherry + ttx-3::mCherry)III; daf-12(sa204); daf-19(m86)	This work
4	NFB2150	otIs395(ift-20p::NLS::tagRFP + pha-1(+)); fkh-8(tm292) II; daf-12(sa204) X	This work
4	NFB2153	otIs395(ift-20p::NLS::tagRFP + pha-1(+)); fkh-8(tm292) II; daf-12(sa204) X; daf-19(m86) II	This work
4	NFB2154	otIs395(ift-20p::NLS::tagRFP + pha-1(+)); fkh-8(vlc39) II; daf-12(sa204) X; daf-19(m86) II; dpy-10(cn64) II	This work
text	NFB2239	vlcEx1137(xbx-1p::NLS::gfp, rol-6(su1006)); fkh-8(tm292) II; daf-12(sa204) X	This work
text	NFB2428	vlcEx1137(xbx-1p::NLS::gfp, rol-6(su1006)); fkh-8(tm292) II; daf-12(sa204) X; daf-19(m86) II	This work
S9	NFB2149	vlcEx822(xbx-1p::NLS::gfp, rol-6(su1006)); fkh-8(tm292) II; daf-12(sa204) X	This work
S9	NFB2152	vlcEx822(xbx-1p::NLS::gfp, rol-6(su1006)); fkh-8(tm292) II; daf-12(sa204) X; daf-19(m86) II	This work
text	NFB2238	vlcEx815(osm-1p::NLS::gfp, rol-6(su1006)); fkh-8(tm292) II; daf-12(sa204) X	This work
text	NFB2350	vlcEx815(osm-1p::NLS::gfp, rol-6(su1006)); fkh-8(tm292) II; daf-12(sa204) X; daf-19(m86) II	This work
S9	NFB2236	vlcEx835(peli-1p::NLS::gfp, rol-6(su1006)); fkh-8(tm292) II; daf-12(sa204) X	This work
S9	NFB2349	vlcEx835(peli-1p::NLS::gfp, rol-6(su1006)); fkh-8(tm292) II; daf-12(sa204) X; daf-19(m86) II	This work
text	NFB2192	vlcEx824(peli-1p::NLS::gfp, rol-6(su1006)); otIs395(ift-20p::NLS::tagRFP + pha-1(+)); fkh-8(tm292) II; daf-12(sa204) X	This work
text	NFB2191	vlcEx824(peli-1p::NLS::gfp, rol-6(su1006)); otIs395(ift-20p::NLS::tagRFP + pha-1(+)); fkh-8(tm292) II; daf-12(sa204) X; daf-19(m86) II	This work
4	NFB2720	vlcEx815(osm-1p::NLS::gfp, rol-6(su1006)); fkh-8(tm292) II; daf-12(sa204) X; otIs181(dat-1::mCherry + ttx-3::mCherry)III	This work
4	NFB2721	vlcEx815(osm-1p::NLS::gfp, rol-6(su1006)); daf-12(sa204) X; otIs181(dat-1::mCherry + ttx-3::mCherry)III	This work
4	NFB2722	vlcEx815(osm-1p::NLS::gfp, rol-6(su1006)); daf-19(m86) II; daf-12(sa204) X; otIs181(dat-1::mCherry + ttx-3::mCherry)III	This work
4	NFB2723	vlcEx815(osm-1p::NLS::gfp, rol-6(su1006)); daf-19(m86) II; fkh-8(tm292) II; daf-12(sa204) X; otIs181(dat-1::mCherry + ttx-3::mCherry)III	This work
4	NFB2728	vlcEx822(xbx-1p::NLS::gfp, rol-6(su1006)); daf-12(sa204) X; vlcEx1365(srh-211::tagRFP, elt-2::GFP)	This work
4	NFB2729	vlcEx822(xbx-1p::NLS::gfp, rol-6(su1006)); fkh-8(tm292) II; daf-12(sa204) X; vlcEx1365(srh-211::tagRFP, elt-2::GFP)	This work
4	NFB2730	vlcEx822(xbx-1p::NLS::gfp, rol-6(su1006)); daf-19(m86) II; daf-12(sa204) X; vlcEx1365(srh-211::tagRFP, elt-2::GFP)	This work
4	NFB2731	vlcEx822(xbx-1p::NLS::gfp, rol-6(su1006)); daf-19(m86) II; fkh-8(tm292) II; daf-12(sa204) X; vlcEx1365(srh-211::tagRFP, elt-2::GFP)	This work
-	NFB177	otIs259(dat-1p::gfp, rol-6(su1006))	Hobert Lab
-	SK4013	zdIs13 (tph-1p::GFP) IV	CGC
-	CX3553	kyIs104 (str-1p::GFP) X; lin-15B&lin-15A(n765)	CGC
-	NL1603	pkIs583 (gpa-6::GFP + dpy-20(+)); dpy-20(e1282) IV	CGC
5	NFB1756	otIs259(dat-1p::gfp, rol-6(su1006)); otIs395(ift-20p::NLS::tagRFP + pha-1(+))	This work
5	NFB2447	otIs259(dat-1p::gfp, rol-6(su1006)); otIs395(ift-20p::NLS::tagRFP + pha-1(+)); fkh-8(vlc43) II	This work
5	NFB2448	zdIs13 (tph-1p::GFP) IV; otIs395(ift-20p::NLS::tagRFP + pha-1(+))	This work
5	NFB2449	zdIs13 (tph-1p::GFP) IV; otIs395(ift-20p::NLS::tagRFP + pha-1(+)); fkh-8(vlc43) II	This work
5	NFB2450	kyIs104 (str-1p::GFP) X;; otIs395(ift-20p::NLS::tagRFP + pha-1(+))	This work
5	NFB2451	kyIs104 (str-1p::GFP) X;; otIs395(ift-20p::NLS::tagRFP + pha-1(+)); fkh-8(vlc43) II	This work
5	NFB2452	pkIs583 (gpa-6::GFP + dpy-20(+)); otIs395(ift-20p::NLS::tagRFP + pha-1(+))	This work
5	NFB2453	pkIs583 (gpa-6::GFP + dpy-20(+)); otIs395(ift-20p::NLS::tagRFP + pha-1(+)); fkh-8(vlc43) II	This work
7	NFB2363	vlcEx1241(dat-1p::fkh-8::T2A::gfp, rol-6(su1006)); otIs395(ift-20p::NLS::tagRFP + pha-1(+)); fkh-8(vlc43) II	This work
7	NFB2364	vlcEx1242(dat-1p::fkh-8::T2A::gfp, rol-6(su1006)); otIs395(ift-20p::NLS::tagRFP + pha-1(+)); fkh-8(vlc43) II	This work
7	NFB2365	vlcEx1243(dat-1p::fkh-8::T2A::gfp, rol-6(su1006)); otIs395(ift-20p::NLS::tagRFP + pha-1(+)); fkh-8(vlc43) II	This work
7	NFB2366	vlcEx1244(dat-1p::FoxN4::T2A::gfp, rol-6(su1006)); otIs395(ift-20p::NLS::tagRFP + pha-1(+)); fkh-8(vlc43) II	This work
7	NFB2367	vlcEx1245(dat-1p::FoxN4::T2A::gfp, rol-6(su1006)); otIs395(ift-20p::NLS::tagRFP + pha-1(+)); fkh-8(vlc43) II	This work
7	NFB2368	vlcEx1246(dat-1p::FoxN4::T2A::gfp, rol-6(su1006)); otIs395(ift-20p::NLS::tagRFP + pha-1(+)); fkh-8(vlc43) II	This work
7	NFB2369	vlcEx1247(dat-1p::FoxJ1::T2A::gfp, rol-6(su1006)); otIs395(ift-20p::NLS::tagRFP + pha-1(+)); fkh-8(vlc43) II	This work
7	NFB2370	vlcEx1248(dat-1p::FoxJ1::T2A::gfp, rol-6(su1006)); otIs395(ift-20p::NLS::tagRFP + pha-1(+)); fkh-8(vlc43) II	This work
7	NFB2371	vlcEx1249(dat-1p::FoxJ1::T2A::gfp, rol-6(su1006)); otIs395(ift-20p::NLS::tagRFP + pha-1(+)); fkh-8(vlc43) II	This work
7	NFB2372	vlcEx1250(dat-1p::FoxI1::T2A::gfp, rol-6(su1006)); otIs395(ift-20p::NLS::tagRFP + pha-1(+)); fkh-8(vlc43) II	This work
7	NFB2457	vlcEx1283(dat-1p::FoxI1::T2A::gfp, rol-6(su1006)); otIs395(ift-20p::NLS::tagRFP + pha-1(+)); fkh-8(vlc43) II	This work
7	NFB2458	vlcEx1284(dat-1p::FoxI1::T2A::gfp, rol-6(su1006)); otIs395(ift-20p::NLS::tagRFP + pha-1(+)); fkh-8(vlc43) II	This work
S8	NFB2267	vlcEx361(daf-19fos::GFP, rol-6(su1006)); otIs181(dat-1::mCherry + ttx-3::mCherry) III	This work
S8	NFB2475	vlcEx361(daf-19fos::GFP, rol-6(su1006)); otIs181(dat-1::mCherry + ttx-3::mCherry) III; fkh-8(vlc43) II	This work
9A	NFB2747	vlcEx1168(kap-1::NLS::GFP + rol(su1006))	This work
9A	NFB2623	vlcEx1168(kap-1::NLS::GFP + rol(su1006)); fkh-8(tm292) II	This work
9A	NFB2188	vlcEx1168(kap-1::NLS::GFP + rol(su1006)); daf-19(m86) II; daf-12(sa204) X	This work
9A	NFB2748	vlcEx1168(kap-1::NLS::GFP + rol(su1006)); fkh-8(tm292) II; daf-19(m86) II; daf-12(sa204) X	This work
9C	NFB2633	vlcEx1355(hsp-16.2::DAF-19D + rol-6(su1006) + elt-2::GFP); otIs395(ift-20::NLS::tagRFP) III	This work
9C	NFB2634	vlcEx1356(hsp-16.2::DAF-19D + rol-6(su1006) + elt-2::GFP); otIs395(ift-20::NLS::tagRFP) III	This work
9C	NFB2635	vlcEx1357(hsp-16.2::DAF-19D + rol-6(su1006) + elt-2::GFP); otIs395(ift-20::NLS::tagRFP) III	This work
9C	NFB2630	vlcEx1352(hsp::fkh-8::T2A::GFP; rol-6(su1006); elt-2::GFP); otIs395(ift-20::NLS::tagRFP) III	This work
9C	NFB2631	vlcEx1353(hsp::fkh-8::T2A::GFP; rol-6(su1006); elt-2::GFP); otIs395(ift-20::NLS::tagRFP) III	This work
9C	NFB2632	vlcEx1354(hsp::fkh-8::T2A::GFP; rol-6(su1006); elt-2::GFP); otIs395(ift-20::NLS::tagRFP) III	This work

## Sheet: Plasmids
Plasmid	Construct	Source
pNF84	pPD95.75	Fire Lab
pNF755	dat-1::fkh-8b::T2A::GFP_pPD9575	This work
pNF756	dat-1::FoxJ1::T2A::GFP_pPD9575	This work
pNF757	dat-1::FoxN4::T2A::GFP_pPD9575	This work
pNF758	dat-1::FoxI4::T2A::GFP_pPD9575	This work
pNF704	hsp-16.2::UNC-62	This work
pNF796	hsp-16.2::DAF-19D	This work
pNF797	hsp-16.2::fkh-8b::T2A::GFP_pPD9575	This work
pNF774	pcDNA3.1(-)HA::hFKH-8	This work
pNF776	pcDNA3.1(-)FLAG::hDAF-19	This work

## Sheet: Genotyping primers
Target	Design	Type	Name	Sequence	Product
daf-19(m86)	Flanking point mutation	FW	oMM176	cagtattcaaacaacatgcag	269 bp
		RV	oMM179	gaagatacaacatgtttcgg
daf-19(of5)	External to deletion	FW	oRR428	actaaatgcaacatcgtctgg	523 bp (wt)
		RV	oRR430	gtagttgttctacgaaacgca	511 bp (mut)
	Internal to deletion	FW	oRR429	gaaagtcatgaccaatgagga	456 bp (wt)
		RV	oRR430	gtagttgttctacgaaacgca	No band (mut)
daf-12(sa204)	Flanking point mutation	FW	oMM178	gatttggttatttctagcatc	505 bp
		RV	oMM179	aacatagcaaattatagggg
fkh-8(tm292)	External to deletion	FW	oRR422	ttgaagagtggctgaaagaacaga	753 bp (wt)
		RV	oRR423	gaggatggtgggtttgtgtaga	222 bp (mut)
fkh-8(vlc39) fkh-8(vlc43)	External to deletion	FW	oCC554	ctgcttgctgcattcctcgcttc	2470 bp (wt)
		RV	oCC555	tctattaacgtgtggagagacgc	606 bp (mut)
	Internal to deletion	FW	oCC554	ctgcttgctgcattcctcgcttc	609 bp (wt)
		RV	oCC556	ccagatgttgacctcagccac	No band (mut)

## Sheet: Ciliary Reporters primers
Target	Type	Name	Sequence
pPD95·75 and its derivatives	FW	C	agcttgcatgcctgcaggtcg
	RV	D	aagggcccgtacggccgacta
	RV*	D*	ggaaacagttatgtttggtata
SV40 NLS	FW	oRR265	atgaccgctccaaagaagaaac
che-11	FW	oRR121	ccgaatttatctagatgtttccccga
(-208 bp from ATG)	FW*	oRR122	tagatgtttccccgaaatt
	RV Fus. NLS	oRR271	gtttcttctttggagcggtcatttatgttaataattgaagaaatcgggaagtaagg
che-13	FW	oRR108	aagtactgcataataggaacatacgg
(-525 bp from ATG)	FW*	oRR109	aggaacatacggcgttat
	RV Fus. NLS	oRR272	gtttcttctttggagcggtcattgtaataatcagataataataatgaaagtgagct
mks-1	FW*	oRR383	tcttttgtattttcttcgaat
(-144 bp from ATG)	RV Fus. NLS	oRR384	gtttcttctttggagcggtcatattgatgttctactaggggt
osm-1	FW	oRR212	tgcccagttgtgaccagtatta
(-1770 bp from ATG)	FW*	oRR213	gtgaccagtattacaatccttccca
	RV Fus. NLS	oRR280	gtttcttctttggagcggtcatcctcatgaactgaataactgcaagaaa
osm-5	FW	oRR379	tgttacactctctctcttg
(-142 bp from ATG)	RV Fus. NLS	oRR380	gtttcttctttggagcggtcattaagaaaagtgttctcagaag
peli-1(short)	FW	oRR221	gctcatagatctctaagaatttcg
(-225 bp from ATG)	FW*	oRR222	tctaagaatttcgacacttttc
peli-1(long)	FW	oRR224	tgtgattctaatcttcatcaagat
(-1128 bp from ATG)	FW*	oRR225	agatctttacacctgagttc
peli-1	RV Fus. NLS	oRR333	gtttcttctttggagcggtcattaatctgaaactcaacatacaaat
tmem-107	FW	oRR381	aaaataaaatttttcatgtaaacc
(-143 bp from ATG)	RV Fus. NLS	oRR382	gtttcttctttggagcggtcatttcttaaagaagcttgcg
tub-1	FW	oRR105	atggatatttggatgtcatgctaaaaattataca
(-424 bp from ATG)	FW*	oRR106	gctaaaaattatacattcatttatgttg
	RV Fus. NLS	oRR282	gtttcttctttggagcggtcatgattacctggaaactttgaatagtttttgaac
xbx-1(short)	FW	oRR337	ctctcctcgtttcttgttgaacg
(-105 bp from ATG)	FW Mut. FKH	oRR370	ctctcctcgtttCTGTGGTCCcgcccgt
xbx-1(long)	FW	oRR94	catgaagagaacatttggttctaggaatattt
(-370 bp from ATG)	FW*	oRR95	gaatatttatttgaattaattcttgttttt
xbx-1	RV Fus. NLS	oRR283	gtttcttctttggagcggtcatactaataaattgagcaatattggagaaaaagga
ift-20	FW	oRR484	ctactgaacacccaatctcgctttaattcccgctcCAATCTTTCTCTCCGTCTCTCAATA
(-135 bp from ATG)	RV Int. Mut	oRR485	cttcacgttgctatagagacacgtaggcgaccattTATTGAGAGACGGAGAGAAAGATTG
	FW Int. Mut	oRR486	AATAaatggtcgcctacgtgtctctatagcaacgtgaagcaGGAGAGAGCTCTAGCCTTG
	RV Fus. NLS	oRR487	gtttcttctttggagcggtcattcttgtaatgcgaatgagtCAAGGCTAGAGCTCTCTCC
kap-1	FW	oRR247	CCGAACAAATAAAATAGAACACtggt
(-234 bp from ATG)	FW*	oRR248	tggtacaagcgtgtaagc
	RV Fus. NLS	oRR334	GTTTCTTCTTTGGAGCGGTCATTAATtgagctaaacacggaaaatca
RFP (from an otIs395 strain)	FW	oRR607	atggtgtctaagggcgaag
srh-211	FW	oRR601	AGTTTGGTAGTTTTTATCCGCTG
(-968 bp from ATG)	RV fus. RFP	oRR602	tcttcgcccttagacaccatTTGTTGCTCAATGTGAATGATC
(*) represents nested primers

## Sheet: CRISPR reagents
Oligo name	Oligo sequence	Oligo function		Component	Volume	Final concentration
fkh-8(vlc-39)II and fkh-8(vlc-43)II; full deletion of fkh-8				fkh-8 5’ crRNA	1	35 microM
fkh-8 5’ crRNA	gagaatcggtggatgaatgg	5’ crRNA		fkh-8 3’ crRNA	1	35 microM
fkh-8 3’ crRNA	tcatctgaatcattgttaac	3’ crRNA		dpy-10 crRNA	1	5 microM
oc547	cattccattttcacaaacctcatgcatttccaatctcaattattcctccataaattgttaatctaaaggttcaaaaactcacatatttttcacacagtgt	Repair template		Cas9 trarnRNA	1.5	48 microM
dpy-10(cn64)II; used for co-CRISPR				Cas9 nuclease	1.64	10 microM
dpy-10 crRNA	gctaccataggcaccacgag	5’ homology arm		oc547	1	175 ng
dpy-10 ssODN	cacttgaacttcaatacggcaagatgagaatgactggaaaccgtaccgcatgcggtgcctatggtagcggagcttcacatggcttcagaccaacagcct	Repair template		dpy-10 ssODN	1	3.3 microM
				nuclease-free water	1.86	( – )
				MIX	10 microL

## Sheet: Rescue primers
Target	Type	Name	Sequence
fkh-8	FW	oRR455	gagagaGGTACCatgtcagatctaagctcaagc
	RV Fus. T2A	oRR456	CAGACTTCCTCTGCCCTCtagcaatttatcccagtcatactc
FoxI1	FW	oRR440	gagagaGGTACCATGAGCTCCTTCGACCTC
	RV Fus. T2A	oRR441	CAGACTTCCTCTGCCCTCgacttcagtgccttccctg
FoxJ1	FW	oRR442	gagagaGGTACCatggcggagagctggctg
	RV Fus. T2A	oRR443	CAGACTTCCTCTGCCCTCcaagaaggcacccacactg
FoxN4	FW	oRR448	gagagaGGTACCatgatagaaagtggcatttgg
	RV Fus. T2A	oRR449	CAGACTTCCTCTGCCCTCaagcagagcaataggcttg
T2A	FW	oRR450	GAGGGCAGAGGAAGTCTGC
	RV	oRR451	TGGGCCAGGATTCTCCTC
	FW full sequence	oRR452	GAGGGCAGAGGAAGTCTGCTAACATGCGGTGACGTCGAGGAGAATCCTGGCCCA
	RV Fus. eGFP	oRR453	gaaaagttcttctcctttactcatTGGGCCAGGATTCTCCTC
eGFP	FW	oRR454	atgagtaaaggagaagaacttttc
	RV	D	aagggcccgtacggccgacta
