# Supplementary figures and images for: Forkhead transcription factor FKH-8 cooperates with RFX in the direct regulation of sensory cilia in Caenorhabditis elegans
Source: eLife journal article supplement (doi:10.7554/elife.89702), 2023-07-14

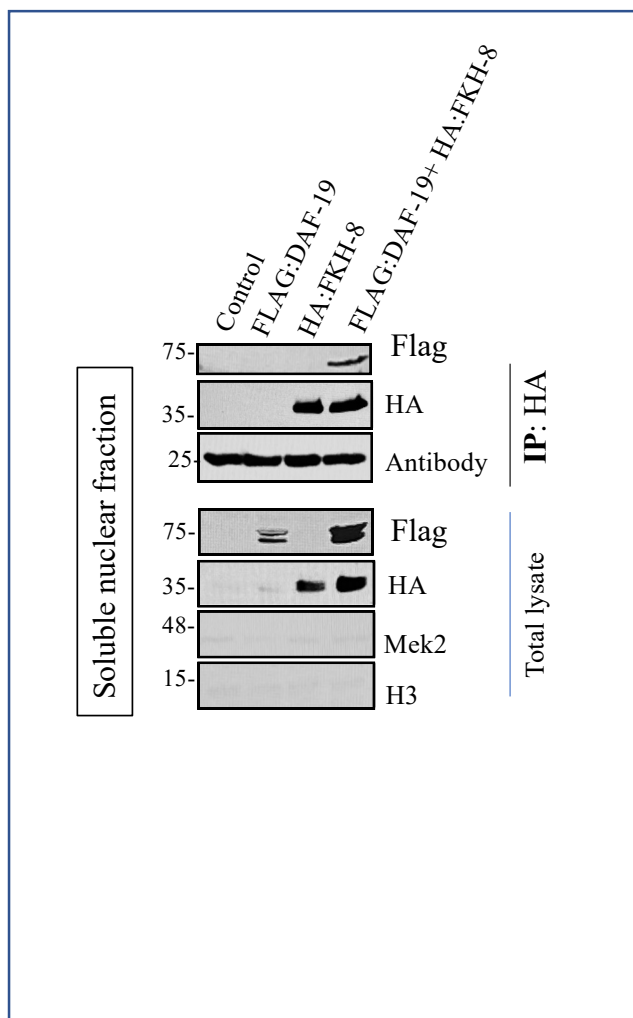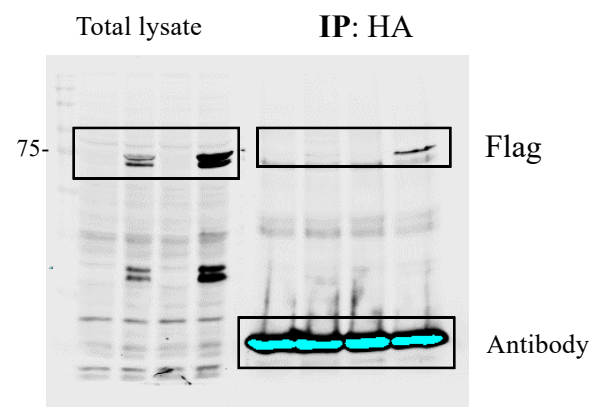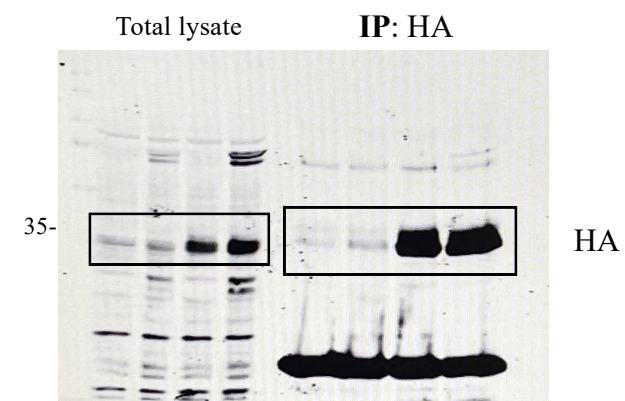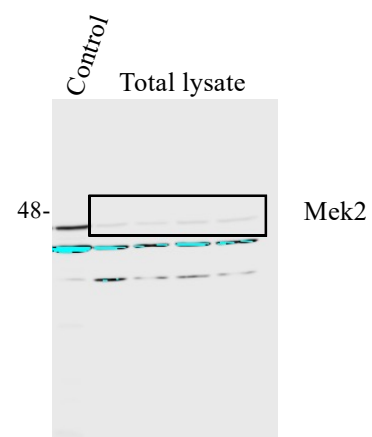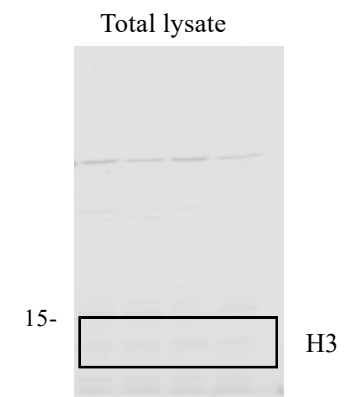

Supplement: fig2-data3 [file elife-89702-fig2-data3-v2.zip]

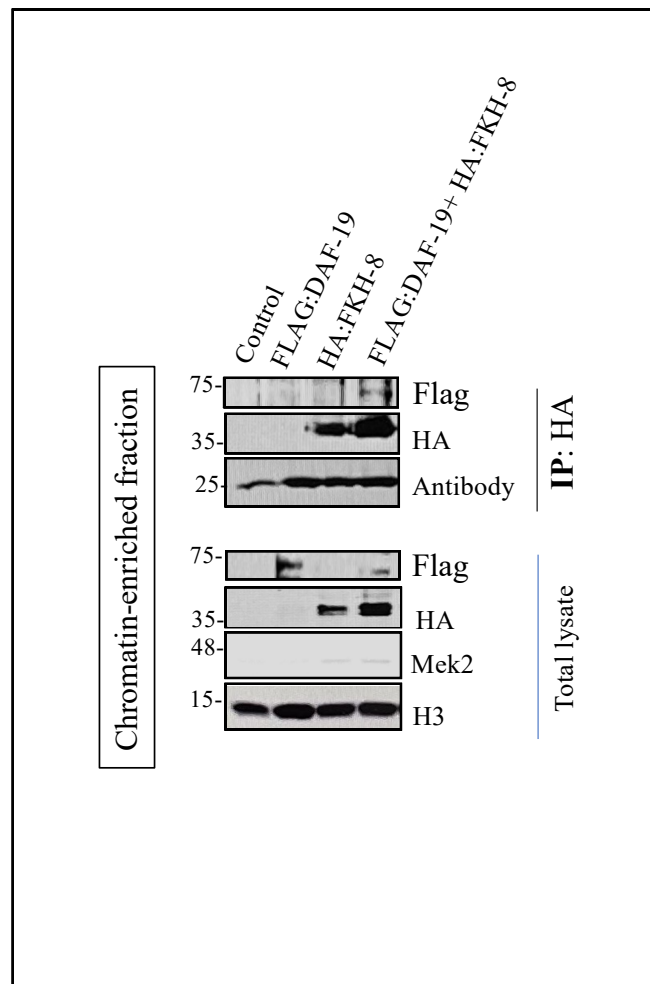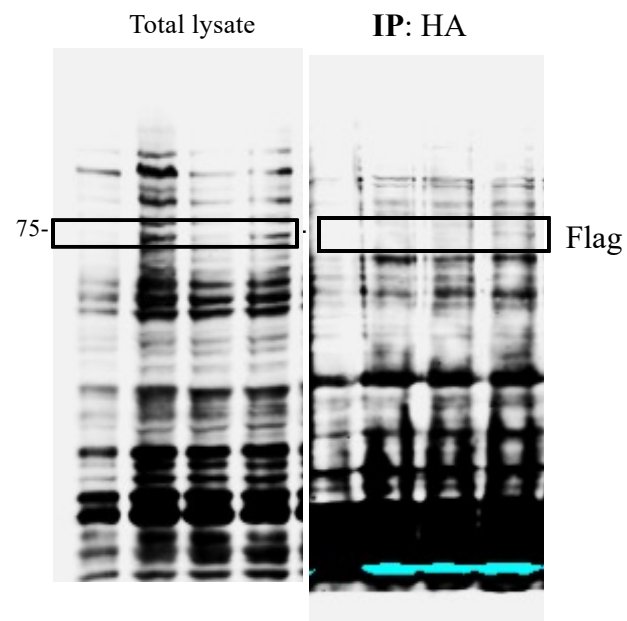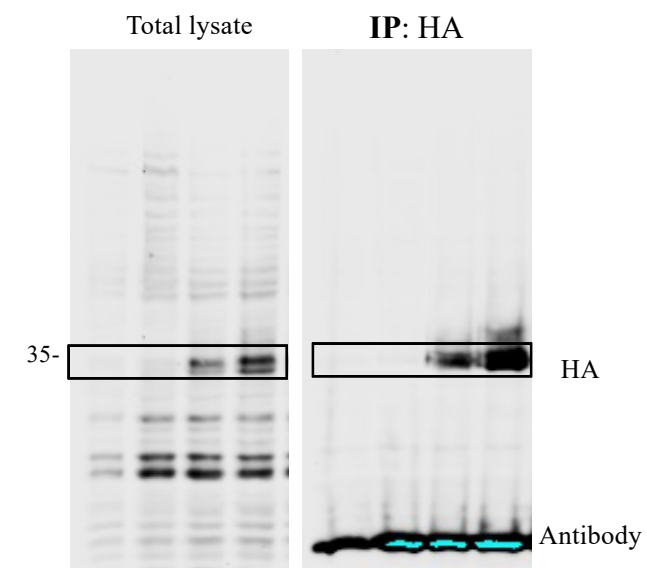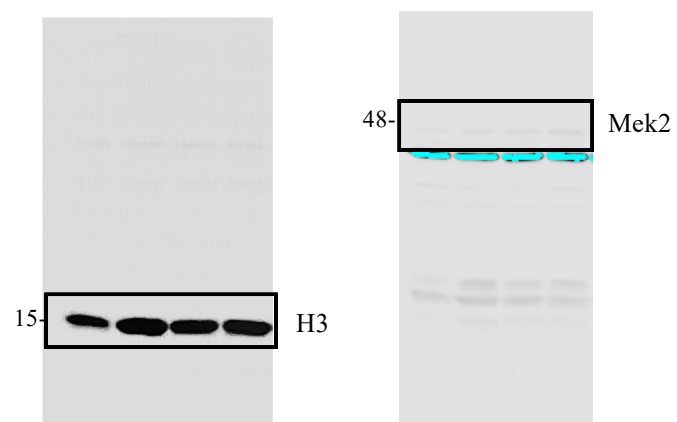

Supplement: fig2-figsupp2-data1 [file elife-89702-fig2-figsupp2-data1-v2.zip]
